# Supplementary material for: Computational molecular refinement to enhance enantioselectivity by reinforcing hydrogen bonding interactions in major reaction pathway
Source: Royal Society of Chemistry journal article supplement (doi:10.1039/d3sc01637d), 2023-01-01
Supplement: d3sc01637d1.pdf [file d3sc01637d1.pdf]

## Contents

|                                                                                     |             |
|-------------------------------------------------------------------------------------|-------------|
| 1. General Information                                                              | <b>S2</b>   |
| 2. Preparation of substrates                                                        | <b>S3</b>   |
| 3. Enantioselective Diels-Alder Reaction of 2-Vinylquinolines with Dienylcarbamates | <b>S8</b>   |
| 3-1. General Procedure                                                              | S8          |
| 3-2. Screening of reaction conditions                                               | S18         |
| 4. Computational study by DFT calculations                                          | <b>S19</b>  |
| 4-1. Method                                                                         | S19         |
| 4-2. Investigation of other transition state structures                             | S19         |
| 4-3. Investigation of other calculation methods                                     | S20         |
| 4-4. Energy profile                                                                 | S21         |
| 4-5. Distortion/Interaction analysis                                                | S22         |
| 4-6. NCI plot                                                                       | S23         |
| 4-7. Investigation of substituent effect                                            | S24         |
| 4-8. Coordination                                                                   | S26         |
| 5. Hammett plot                                                                     | <b>S69</b>  |
| 6. NMR experiment                                                                   | <b>S70</b>  |
| 7. Determination of relative and absolute configurations                            | <b>S71</b>  |
| 7-1. Relative configurations                                                        | S71         |
| 7-2. Absolute configurations                                                        | S72         |
| 8. Reference                                                                        | <b>S75</b>  |
| 9. NMR spectra                                                                      | <b>S77</b>  |
| 10. HPLC charts                                                                     | <b>S118</b> |

## 1. General Information

All reactions were carried out under nitrogen atmosphere in flame-dried glassware. Toluene (tol), dichloromethane (DCM) and tetrahydrofuran (THF) were supplied from KANTO Chemical Co., Inc. as “Dehydrated solvent system”. Other solvents and reagents were purchased from commercial suppliers (Wako Pure Chemical Industries, Ltd., Tokyo Chemical Industry Co., LTD., Aldrich Inc., and others) and used without further purification. Purification of reaction products was carried out by flash column chromatography using silica gel 60 N (Merck 40-63  $\mu\text{m}$ ). Analytical thin layer chromatography (TLC) was performed on Merck precoated TLC plates (silica gel 60 GF 254, 0.25 mm).  $^1\text{H}$  NMR spectra were recorded on a JEOL ECA-600 (600 MHz) spectrometer. Chemical shifts are reported in ppm from tetramethylsilane or solvent resonance as the internal standard ( $\text{CDCl}_3$ : 7.26 ppm, TMS: 0.00 ppm).  $^{13}\text{C}$  NMR spectra were recorded on a JEOL ECA-600 (150 MHz) spectrometer with complete proton decoupling. Chemical shifts are reported in ppm from the solvent resonance as the internal standard ( $\text{CDCl}_3$ : 77.2 ppm).  $^{19}\text{F}$  NMR spectra were recorded on JEOL ECA-600 (565 MHz) spectrometer with complete proton decoupling. Infrared spectra were recorded on a Jasco FT/IR-4100 spectrometer. Chiral stationary phase HPLC analysis was performed on a Jasco LC-2000 Plus Series system with DACIEL chiral analytical column (4.6 mm $\Phi$ \* 250 mm length). Optical rotations were measured on a Jasco P-1020 digital polarimeter with a sodium lamp and reported as follows;  $[\alpha]^{T^\circ\text{C}}_D$  ( $c = \text{g}/100 \text{ mL}$ , solvent, % ee). High resolution mass spectra analysis was performed on a Bruker Daltonics solariX 9.4T FT-ICR-MS spectrometer and a JEOL JMST100GCV Time-of-Flight Mass Spectrometer at the Research and Analytical Center for Giant Molecules, Graduate School of Science, Tohoku University.

## 2. Preparation of substrates

Procedures for preparation of novel 2-vinylquinolines **1**.

**1** was synthesized from corresponding 2-methylquinoline derivatives **S1**.

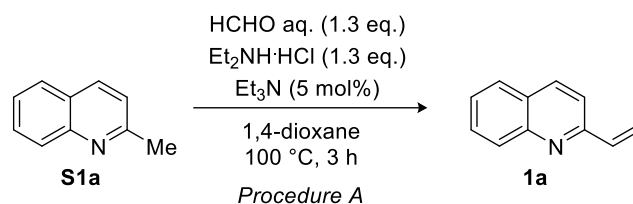

### [Procedure A]

The representative procedure for **1a** was shown below as *Procedure A*. This procedure was slightly modified from Feng's method.<sup>1</sup>

To a frame-dried 50 mL round-bottom flask with a magnetic stirrer bar, 2-methylquinoline (**S1a**) (716 mg, 5.0 mmol), HCHO (30% in H<sub>2</sub>O, 6.5 mmol, 1.3 eq.), Et<sub>2</sub>NH·HCl (713 mg, 6.5 mmol, 1.3 eq.), Et<sub>3</sub>N (35 uL, 0.25 mmol, 5 mol %) and 1,4-dioxane (10 mL) were added. This suspension was heated to 100 °C until the starting material **S1a** was fully consumed (checked by TLC). After cooling to room temperature, H<sub>2</sub>O (15 mL) was added, and extracted with DCM (10 mL \* 3 times). The combined organic layers were dried over MgSO<sub>4</sub>, and the solvent was removed under reduced pressure. The residue was purified by column chromatography using hexane/ethyl acetate (14/1) as the eluent yielding the 2-vinyl quinoline **1a** (590 mg, 3.8 mmol, 76% yield) as a colorless oil. **1a** was stored at -20 °C under Ar atmosphere.

2-vinylquinolines **1a**, **1c** and **1g** were known compounds and their data are identical with the reported literature.<sup>1</sup>

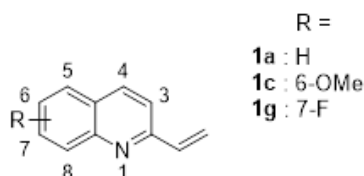

### 6-Chloro-2-vinylquinoline (**1b**)

64% yield [*Procedure A*]; white solid;  $R_f = 0.40$  (Hexane/EtOAc= 6/1); <sup>1</sup>H NMR (600 MHz, CDCl<sub>3</sub>)  $\delta$  8.02 (d,  $J = 8.4$  Hz, 1H), 7.99 (d,  $J = 8.4$  Hz, 1H), 7.76 (d,  $J = 2.4$  Hz, 1H), 7.65-7.58 (m, 2H), 7.01 (dd,  $J = 17.4, 10.8$  Hz, 1H), 6.29 (d,  $J = 17.4$  Hz, 1H), 5.69 (d,  $J = 10.6$  Hz, 1H); <sup>13</sup>C NMR (150 MHz, CDCl<sub>3</sub>)  $\delta$  156.4, 146.5, 137.7, 135.6, 132.1, 131.1, 130.7, 128.1, 126.3, 120.5, 119.5; IR (ATR) 3089, 3053, 3020, 2990, 1849, 1592, 1556, 1493, 1421, 1382, 1308, 1192, 1073, 993, 924, 903, 831, 726 cm<sup>-1</sup>; HRMS (FD<sup>+</sup>)  $m/z$ : [M+H]<sup>+</sup> Calcd for C<sub>11</sub>H<sub>8</sub>ClN 189.03453, found: 189.03450.

### 7-Chloro-2-vinylquinoline (**1h**)

60% yield [*Procedure A*]; white solid;  $R_f = 0.45$  (Hexane/EtOAc= 6/1); <sup>1</sup>H NMR (600 MHz, CDCl<sub>3</sub>)  $\delta$  8.09 (d,  $J = 8.4$  Hz, 1H), 8.06 (d,  $J = 1.8$  Hz, 1H), 7.71 (d,  $J = 9.0$  Hz, 1H), 7.58 (d,  $J = 9.0$  Hz, 1H), 7.45 (dd,  $J = 8.4, 1.8$  Hz, 1H), 7.01 (dd,  $J = 18.0, 10.8$  Hz, 1H), 6.31 (dd,  $J = 18.0, 0.6$  Hz, 1H), 5.69 (dd,  $J = 10.8, 0.6$  Hz, 1H); <sup>13</sup>C NMR (150 MHz, CDCl<sub>3</sub>)  $\delta$  157.1, 148.6, 137.7, 136.3, 135.6, 128.8, 128.5, 127.4, 125.9, 120.8, 118.9; IR (ATR) 3090, 3059, 3016, 2989, 1852, 1609, 1597, 1496, 1427, 1396,

1144, 1130, 1070, 993, 927, 873, 848, 777  $\text{cm}^{-1}$ ; HRMS (FD<sup>+</sup>)  $m/z$ :  $[M+H]^+$  Calcd for  $\text{C}_{11}\text{H}_8\text{ClN}$  189.03453, found: 189.03449.

**1d**, **1e**, and **1f** were synthesized from corresponding quinoline derivatives **SSS1**.

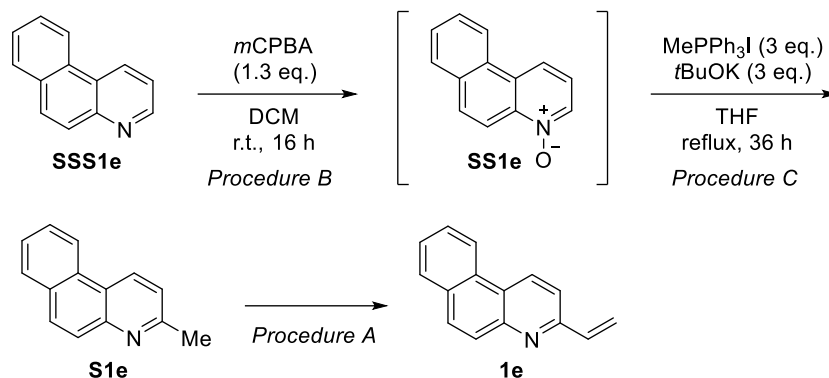

The representative procedure for **1e** was shown below as *Procedure B* and *Procedure C*. These procedures were slightly modified from Kim's method.<sup>2a</sup>

#### [Procedure B]

To a solution of **SSS1e** (1115 mg, 6.2 mmol) in dry-DCM (25 mL), *m*CPBA (60%, 1.8 g, 1.3 eq.) was added in three portions at room temperature under  $\text{N}_2$  atmosphere. After 16 h, 1*N* NaOH aq. (20 mL) was added. The organic layer was separated, and the aqueous layer was extracted with DCM (20 mL \* 2 times). The combined organic layers were dried over  $\text{MgSO}_4$ , and the solvent was removed under reduced pressure. This crude material including quinoline *n*-oxide **SS1e** was directly used for the next step without further purification.

#### [Procedure C]

To a corresponding crude material of **SS1e** in a flame-dried 100 mL round-bottom flask with a reflux condenser,  $\text{MePPh}_3\text{I}$  (7.54 g, 18.7 mmol, 3.0 eq.), *t*BuOK (2.1 g, 18.7 mmol, 3.0 eq.) and dry-THF (16 mL) were added. This mixture was heated to 85 °C (reflux) for 36 h under  $\text{N}_2$  atmosphere. After cooling to ambient temperature, this solution was filtered through Celite<sup>®</sup>, and the solvent removed under reduced pressure. The residue was purified by column chromatography using hexane/ethyl acetate (9/1 to 4/1) as the eluent yielding the 2-methyl quinoline derivative **S1e** (878 mg, 4.55 mmol, 76% yield) as a yellow solid.

2-methylquinoline derivative **S1d**<sup>2b</sup> and **S1e**<sup>2a</sup> were known compounds and their data are identical to the reported literature.

#### 5-Bromo-2-vinylquinoline (**1d**)

29% yield [3 steps, *Procedure B, C and A*]; colorless oil;  $R_f$  = 0.44 (Hexane/EtOAc= 6/1); <sup>1</sup>H NMR (600 MHz,  $\text{CDCl}_3$ )  $\delta$  8.49 (d,  $J$  = 8.4 Hz, 1H), 8.03 (d,  $J$  = 7.8 Hz, 1H), 7.77 (dd,  $J$  = 8.4, 1.2 Hz, 1H), 7.68 (d,  $J$  = 8.4 Hz, 1H), 7.55 (dd,  $J$  = 8.4, 7.8 Hz, 1H), 7.04 (dd,  $J$  = 17.4, 10.8 Hz, 1H), 6.34 (d,  $J$  = 17.4 Hz, 1H), 5.72 (d,  $J$  = 10.8 Hz, 1H); <sup>13</sup>C NMR (150 MHz,  $\text{CDCl}_3$ )  $\delta$  156.9, 148.9, 136.0, 137.4,



136.0, 130.1, 130.0, 129.4, 127.0, 121.9, 121.1, 119.8; IR (ATR) 3089, 3063, 3019, 2984, 2902, 1607, 1588, 1547, 1492, 1395 1305, 1125, 1089, 953, 927, 905, 835, 814, 771  $\text{cm}^{-1}$ ; HRMS (FD+)  $m/z$ :  $[M+H]^+$  Calcd for  $\text{C}_{11}\text{H}_8\text{BrN}$  232.98401, found: 232.98394.

### 3-Vinylbenzo[f]quinoline (1e)

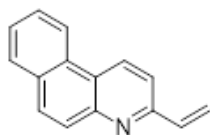

46% yield [3 steps, *Procedure B, C and A*]; pale yellow solid;  $R_f = 0.40$  (Hexane/EtOAc= 6/1);  $^1\text{H NMR}$  (600 MHz,  $\text{CDCl}_3$ )  $\delta$  8.87 (d,  $J = 9.0$  Hz, 1H), 8.57 (d,  $J = 7.8$  Hz, 1H), 7.96 (s, 2H), 7.91 (dd,  $J = 7.2, 1.2$  Hz, 1H), 7.70 (d,  $J = 7.8$  Hz, 1H), 7.67 (ddd,  $J = 7.8, 7.2, 1.2$  Hz, 1H), 7.62 (ddd,  $J = 7.8, 7.2, 1.2$  Hz, 1H), 7.07 (dd,  $J = 17.7, 10.8$  Hz, 1H), 6.35 (dd,  $J = 17.7, 0.6$  Hz, 1H), 5.66 (dd,  $J = 10.8, 0.6$  Hz, 1H);  $^{13}\text{C NMR}$  (150 MHz,  $\text{CDCl}_3$ )  $\delta$  155.7, 148.1, 137.7, 131.8, 131.2, 131.1, 129.7, 128.8, 128.4, 127.3, 127.2, 124.6, 122.7, 119.6, 118.8; IR (ATR) 3057, 3016, 2985, 2910, 2789, 1580, 1567, 1489, 1456, 1415, 1235, 1090, 925, 867, 832, 750  $\text{cm}^{-1}$ ; HRMS (FD+)  $m/z$ :  $[M+H]^+$  Calcd for  $\text{C}_{15}\text{H}_{11}\text{N}$  205.08915, found: 205.08911.

### 6-Bromo-4-chloro-2-methylquinoline (S1f)

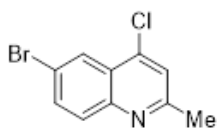

38% yield [2 steps, *Procedure B and C*]; pale orange solid;  $R_f = 0.28$  (Hexane/EtOAc= 6/1);  $^1\text{H NMR}$  (600 MHz,  $\text{CDCl}_3$ )  $\delta$  8.33 (d,  $J = 2.4$  Hz, 1H), 7.88 (d,  $J = 9.0$  Hz, 1H), 7.79 (dd,  $J = 9.0, 2.4$  Hz, 1H), 7.41 (s, 1H), 2.71 (s, 3H);  $^{13}\text{C NMR}$  (150 MHz,  $\text{CDCl}_3$ )  $\delta$  159.5, 147.4, 141.5, 134.0, 130.9, 126.4, 126.0, 122.8, 120.9, 25.3; IR (ATR) 3089, 3049, 3033, 2989, 2903, 1747, 1587, 1546, 1481, 1373, 1306, 1232, 1169, 1073, 979, 924, 837, 765, 657  $\text{cm}^{-1}$ ; HRMS (FD+)  $m/z$ :  $[M+H]^+$  Calcd for  $\text{C}_{10}\text{H}_7\text{BrClN}$  254.94504, found: 254.94495.

### 6-Bromo-4-chloro-2-vinylquinoline (1f)

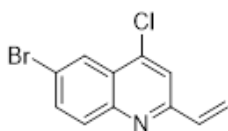

50% yield [*Procedure A*]; white pink solid;  $R_f = 0.46$  (Hexane/EtOAc= 6/1);  $^1\text{H NMR}$  (600 MHz,  $\text{CDCl}_3$ )  $\delta$  8.34 (d,  $J = 2.4$  Hz, 1H), 7.93 (d,  $J = 9.0$  Hz, 1H), 7.81 (dd,  $J = 9.0, 2.4$  Hz, 1H), 7.68 (s, 1H), 6.94 (dd,  $J = 18.0, 10.8$  Hz, 1H), 6.30 (d,  $J = 18.0$  Hz, 1H), 5.73 (d,  $J = 10.8$  Hz, 1H);  $^{13}\text{C NMR}$  (150 MHz,  $\text{CDCl}_3$ )  $\delta$  156.4, 147.5, 141.8, 136.8, 134.2, 131.5, 126.8, 126.5, 121.7, 121.5, 119.5; IR (ATR) 3088, 3065, 3054, 3027, 3010, 2986, 2887, 1748, 1583, 1541, 1480, 1415, 1373, 1317, 1170, 1067, 1025, 984, 931, 913, 876, 824, 780  $\text{cm}^{-1}$ ; HRMS (FD+)  $m/z$ :  $[M+H]^+$  Calcd for  $\text{C}_{11}\text{H}_7\text{BrClN}$  266.94504, found: 266.94499.

Procedures for preparation of novel dienylcarbamates **2**, **7b**, **8**, **9b**, **10b**.

Dienylcarbamates were prepared following literature *procedure D* from corresponding carboxylic acids.<sup>3a</sup>

#### [*Procedure D*]

To a solution of corresponding carboxylic acid (1.0 eq.) in dry-DMF (0.5 M) was added  $\text{NEt}_3$  (1.1 eq.) and diphenyl phosphoryl azido (1.1 eq.) dropwise at 0  $^\circ\text{C}$  and the reaction was allowed to stir for 1 h at the same temperature. Then corresponding benzyl alcohol (3.0 eq.) was added, and the reaction was heated to 85  $^\circ\text{C}$  for 4 h. The reaction was

quenched with water and extracted with hexane/AcOEt = 3/1. The combined organic layers were washed with water and brine, dried over Na<sub>2</sub>SO<sub>4</sub>, concentrated in vacuo, and purified by silica-gel chromatography (hexane/AcOEt = 40/1 to 20/1) to afford the dienylcarbamates in moderate yield.

Dienylcarbamates **2a**,<sup>3a</sup> **2b**,<sup>3a</sup> **2c**,<sup>3b</sup> and **2d**<sup>3a</sup> were known compounds and their data are identical with the reported literatures.

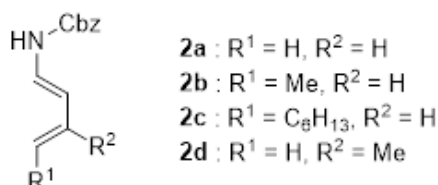

**In all cases, dienylcarbamates showed multiple resonance for the presence of different rotational isomers at 20 °C. Therefore, we conducted <sup>1</sup>H NMR measurements at 50 °C for characterization.**

#### 4-Bromobenzyl ((1E,3E)-penta-1,3-dien-1-yl)carbamate (**7b**)

51% yield [*Procedure D*]; white solid; R<sub>f</sub> = 0.14 (Hexane/EtOAc= 6/1); <sup>1</sup>H NMR (600 MHz, CDCl<sub>3</sub>, VT50) δ 7.49 (d, *J* = 7.8 Hz, 2H), 7.22 (d, *J* = 7.8 Hz, 2H), 6.56 (dd, *J* = 12.6, 12.6 Hz, 1H), 6.29 (brs, 1H), 5.95 (dd, *J* = 12.6, 12.6 Hz, 1H), 5.64 (dd, *J* = 12.6, 12.6 Hz, 1H), 5.51 (qd, *J* = 12.6, 6.6 Hz, 1H), 5.09 (s, 2H), 1.72 (d, *J* = 6.6 Hz, 3H); <sup>13</sup>C NMR (150 MHz, CDCl<sub>3</sub>) δ 153.3, 135.1, 131.9, 130.0, 128.5, 126.2, 124.1, 122.6, 112.4, 66.6, 18.3; IR (ATR) 3315, 3069, 3023, 2958, 2907, 2884, 1687, 1665, 1637, 1529, 1490, 1328, 1277, 1232, 1165, 1060, 1014, 974, 922, 811, 674 cm<sup>-1</sup>; HRMS (FD+) *m/z*: [M+H]<sup>+</sup> Calcd for C<sub>13</sub>H<sub>14</sub>BrNO<sub>4</sub> 295.02079, found: 295.02075.

#### 4-Nitrobenzyl ((1E,3E)-penta-1,3-dien-1-yl)carbamate (**8b**)

49% yield [*Procedure D*]; pale yellow solid; R<sub>f</sub> = 0.18 (Hexane/EtOAc= 3/1); Mp: 122.4-124.9 °C; <sup>1</sup>H NMR (600 MHz, CDCl<sub>3</sub>, VT50) δ 8.21 (d, *J* = 9.0 Hz, 2H), 7.50 (d, *J* = 9.0 Hz, 2H), 6.56 (dd, *J* = 12.0, 12.0 Hz, 1H), 6.38 (brs, 1H), 5.96 (dd, *J* = 12.0, 12.0 Hz, 1H), 5.68 (dd, *J* = 12.0, 10.8 Hz, 1H), 5.54 (qd, *J* = 12.0, 7.2 Hz, 1H), 5.24 (s, 2H), 1.73 (d, *J* = 7.2 Hz, 3H); <sup>13</sup>C NMR (150 MHz, CDCl<sub>3</sub>) δ 153.0, 147.9, 143.4, 128.4, 128.3, 126.6, 124.0, 123.8, 112.9, 65.8, 18.3; IR (ATR) 3297, 3158, 3118, 3018, 2911, 2880, 1703, 1664, 1637, 1606, 1500, 1354, 1323, 1270, 1232, 1164, 1064, 972, 922, 846, 738, 686 cm<sup>-1</sup>; HRMS (FD+) *m/z*: [M+H]<sup>+</sup> Calcd for C<sub>13</sub>H<sub>14</sub>N<sub>2</sub>O<sub>4</sub> 262.09536, found: 262.09525.

#### 4-Methylbenzyl ((1E,3E)-penta-1,3-dien-1-yl)carbamate (**9b**)

78% yield [*Procedure D*]; white solid; R<sub>f</sub> = 0.36 (Hexane/EtOAc= 6/1); <sup>1</sup>H NMR (600 MHz, CDCl<sub>3</sub>, VT50) δ 7.24 (d, *J* = 8.4 Hz, 2H), 7.15 (d, *J* = 8.4 Hz, 2H), 6.58 (t, *J* = 12.0 Hz, 1H), 6.28 (brs, 1H), 5.95 (t, *J* = 12.0 Hz, 1H), 5.61 (t, *J* = 12.0 Hz, 1H), 5.49 (qd, *J* = 12.0, 6.6 Hz, 1H), 5.10 (s, 2H), 2.34 (s, 3H), 1.72 (d, *J* = 6.6 Hz, 3H); <sup>13</sup>C NMR (150 MHz, CDCl<sub>3</sub>) δ 153.5, 138.4, 133.0, 130.2, 129.4, 128.6, 125.9, 124.3, 112.0, 67.4, 21.4, 18.3; IR (ATR)

3300, 3062, 3013, 2952, 2910, 2880, 2848, 1688, 1663, 1637, 1523, 1461, 1376, 1326, 1274, 1228, 1166, 1058, 974, 924, 811, 784, 690  $\text{cm}^{-1}$ ; HRMS (FD+)  $m/z$ :  $[M+H]^+$  Calcd for  $\text{C}_{14}\text{H}_{17}\text{NO}_2$  231.12593, found: 231.12584.

#### 4-Methoxybenzyl ((1E,3E)-penta-1,3-dien-1-yl)carbamate (10b)

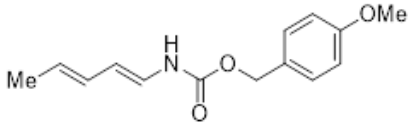 77% yield [Procedure D]; pale yellow solid;  $R_f = 0.18$  (Hexane/EtOAc=6/1);  $^1\text{H NMR}$  (600 MHz,  $\text{CDCl}_3$ , VT50)  $\delta$  7.28 (d,  $J = 8.4$  Hz, 2H), 6.88 (d,  $J = 8.4$  Hz, 2H), 6.58 (dd,  $J = 12.0, 12.0$  Hz, 1H), 6.26 (brs, 1H), 5.95 (dd,  $J = 12.0, 12.0$  Hz, 1H), 5.61 (dd,  $J = 12.0, 12.0$  Hz, 1H), 5.49 (qd,  $J = 12.0, 6.6$  Hz, 1H), 5.08 (s, 2H), 3.80 (s, 3H), 1.72 (d,  $J = 6.6$  Hz, 3H);  $^{13}\text{C NMR}$  (150 MHz,  $\text{CDCl}_3$ )  $\delta$  159.9, 153.5, 130.3, 128.6, 128.1, 125.9, 124.3, 114.1, 111.9, 67.3, 55.4, 18.3; IR (ATR) 3301, 3066, 3011, 2957, 2912, 2838, 1694, 1664, 1638, 1615, 1529, 1516, 1455, 1326, 1273, 1250, 1232, 1176, 1065, 1034, 972, 925, 813, 768  $\text{cm}^{-1}$ ; HRMS (FD+)  $m/z$ :  $[M+H]^+$  Calcd for  $\text{C}_{14}\text{H}_{17}\text{NO}_3$  247.12084, found: 247.12080.

#### 4-Nitrobenzyl (E)-buta-1,3-dien-1-ylcarbamate (8a)

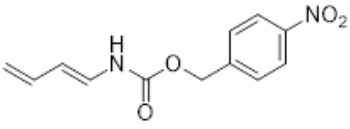 60% yield [Procedure D]; pale yellow solid;  $R_f = 0.12$  (Hexane/EtOAc=3/1); Mp: 111.3-113.8  $^{\circ}\text{C}$ ;  $^1\text{H NMR}$  (600 MHz,  $\text{CDCl}_3$ , VT50)  $\delta$  8.21 (d,  $J = 8.4$  Hz, 2H), 7.50 (d,  $J = 8.4$  Hz, 2H), 6.70 (dd,  $J = 12.0, 12.0$  Hz, 1H), 6.51 (brs, 1H), 6.29-6.23 (m, 1H), 5.74 (s, 1H), 5.25 (s, 2H), 5.06 (d,  $J = 16.8$  Hz, 1H), 4.94 (d,  $J = 12.0$  Hz, 1H);  $^{13}\text{C NMR}$  (150 MHz,  $\text{CDCl}_3$ )  $\delta$  153.0, 147.9, 143.3, 134.3, 134.3, 128.5, 126.6, 124.0, 114.3, 113.1, 65.9; IR (ATR) 3301, 3116, 3090, 3061, 2979, 2938, 2882, 1702, 1660, 1606, 1530, 1509, 1354, 1294, 1282, 1240, 1175, 1066, 997, 926, 898, 842, 737, 687  $\text{cm}^{-1}$ ; HRMS (FD+)  $m/z$ :  $[M+H]^+$  Calcd for  $\text{C}_{12}\text{H}_{12}\text{N}_2\text{O}_4$  248.07971, found: 248.07956.

#### 4-Nitrobenzyl ((1E,3E)-deca-1,3-dien-1-yl)carbamate (8c)

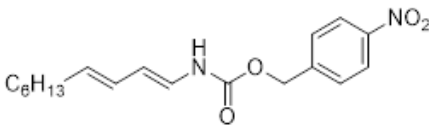 66% yield [Procedure D]; pale yellow solid;  $R_f = 0.20$  (Hexane/EtOAc=6/1);  $^1\text{H NMR}$  (600 MHz,  $\text{CDCl}_3$ , VT50)  $\delta$  8.21 (d,  $J = 7.8$  Hz, 2H), 7.50 (d,  $J = 7.8$  Hz, 2H), 6.57 (dd,  $J = 12.0, 12.0$  Hz, 1H), 6.37 (brs, 1H), 5.94 (dd,  $J = 15.6, 12.0$  Hz, 1H), 5.69 (dd,  $J = 12.0, 12.0$  Hz, 1H), 5.54 (td,  $J = 15.6, 7.2$  Hz, 1H), 5.24 (s, 2H), 2.05 (q,  $J = 7.2$  Hz, 2H), 1.39-1.34 (m, 2H), 1.31-1.23 (m, 6H), 0.88 (t,  $J = 6.6$  Hz, 3H);  $^{13}\text{C NMR}$  (150 MHz,  $\text{CDCl}_3$ )  $\delta$  153.0, 147.9, 143.4, 132.4, 128.4, 127.0, 124.0, 123.9, 113.0, 65.8, 32.9, 31.9, 29.5, 29.0, 22.8, 14.2; IR (ATR) 3330, 3066, 3019, 2957, 2925, 2853, 1698, 1661, 1633, 1610, 1522, 1457, 1347, 1277, 1229, 1054, 977, 848, 768, 738  $\text{cm}^{-1}$ ; HRMS (FD+)  $m/z$ :  $[M+H]^+$  Calcd for  $\text{C}_{18}\text{H}_{24}\text{N}_2\text{O}_4$  332.17361, found: 332.17353.

#### 4-Nitrobenzyl (E)-(3-methylbuta-1,3-dien-1-yl)carbamate (8d)

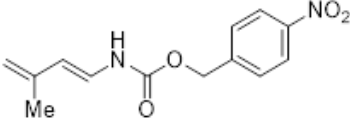 68% yield [Procedure D]; pale yellow solid;  $R_f = 0.32$  (Hexane/EtOAc=3/1);  $^1\text{H NMR}$  (600 MHz,  $\text{CDCl}_3$ , VT50)  $\delta$  8.21 (d,  $J = 7.8$  Hz, 2H), 7.51 (d,  $J = 7.8$  Hz, 2H), 6.67 (dd,  $J = 12.6, 12.6$  Hz, 1H), 6.50 (brs, 1H), 5.82 (d,  $J = 12.6$  Hz, 1H), 5.25 (s, 2H), 4.82 (s, 2H), 1.85 (s, 3H);  $^{13}\text{C NMR}$  (150 MHz,  $\text{CDCl}_3$ )  $\delta$  153.2, 147.9, 143.3, 140.1, 128.5, 124.0, 123.6, 115.2, 114.1, 65.9, 18.8; IR (ATR) 3312, 3083, 2976, 2948, 2891, 1712, 1656, 1608, 1521, 1348, 1281, 1227,

1069, 1015, 947, 854, 767  $\text{cm}^{-1}$ ; HRMS (FD+)  $m/z$ :  $[M+H]^+$  Calcd for  $\text{C}_{13}\text{H}_{14}\text{N}_2\text{O}_4$  262.09536, found: 262.09528.

### 3. Enantioselective Diels-Alder Reaction of 2-Vinyl Quinolines with Dienylcarbamates

#### 3-1. General Procedure

Representative procedure for the enantioselective Diels-Alder reaction of 2-vinyl quinolines **1a** with dienylcarbamate **2a** catalyzed by chiral phosphoric acid (*S*)-**6**.

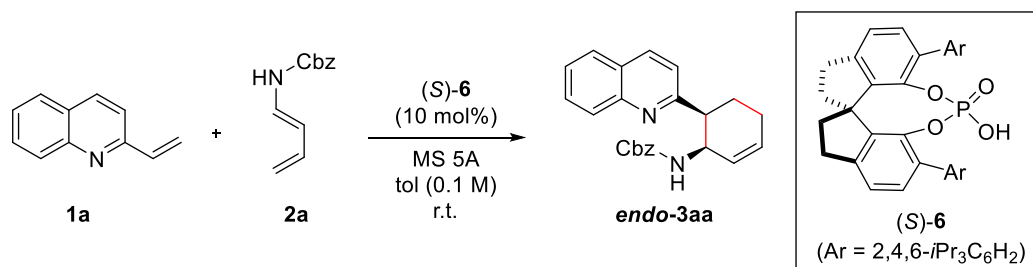

To a solution of **1a** (15.5 mg, 0.1 mmol), **2a** (24.4 mg, 0.12 mmol) and pre-activated MS 5A (50 mg) in dry toluene (1.0 ml), (*S*)-**6** (7.2 mg, 10 mol %) was added. The reaction mixture was stirred at room temperature for 5 days. This suspension was directly charged into column chromatography (Hexane/ EtOAc = 3/1) and purified to give **3aa** (32.6 mg, 0.091 mmol, 91%) as colorless oil. The enantiomeric and diastereomeric excess were determined by chiral stationary phase HPLC analysis.

**In all cases, Diels-Alder adducts show multiple resonance for the presence of different rotational isomers at 20 °C. Therefore, we conducted <sup>1</sup>H NMR measurements at 50 °C for product characterization.**

#### Benzyl (*1R,6S*)-6-(quinolin-2-yl)cyclohex-2-enylcarbamate (**3aa**)

91% yield (32.6 mg); colorless oil;  $[\alpha]_{\text{D}}^{23.0} = -112.4$  ( $c = 1.0$ ,  $\text{CHCl}_3$ , 92% ee);  $R_f = 0.15$  (Hexane/EtOAc = 6/1);  $^1\text{H NMR}$  (600 MHz,  $\text{CDCl}_3$ , VT50)  $\delta$  8.01 (t,  $J = 8.4$  Hz, 2H), 7.75 (d,  $J = 8.4$  Hz, 1H), 7.65 (t,  $J = 7.2$  Hz, 1H), 7.47 (t,  $J = 7.2$  Hz, 1H), 7.33 (d,  $J = 8.4$  Hz, 1H), 7.21-7.16 (m, 3H), 7.05 (brs, 2H), 5.94-5.85 (m, 2H), 5.59 (brs, 1H), 4.86-4.74 (m, 2H), 4.68 (brs, 1H), 3.44 (s, 1H), 2.22-2.03 (m, 4H);  $^{13}\text{C NMR}$  (150 MHz,  $\text{CDCl}_3$ )  $\delta$  162.2, 155.8, 147.6, 136.7, 136.1, 129.8, 129.4, 128.4, 127.9, 127.6, 127.0, 126.0, 121.4, 66.3, 48.8, 45.9, 24.7, 23.5; IR (ATR) 3418, 3323, 3060, 3028, 2934, 2836, 1714, 1601, 1504, 1455, 1330, 1220, 1120, 1058, 1002, 829, 771, 697  $\text{cm}^{-1}$ ; HRMS (FD+)  $m/z$ :  $[M+H]^+$  Calcd for  $\text{C}_{23}\text{H}_{22}\text{N}_2\text{O}_2$  358.16813, found: 358.16806.; HPLC analysis CHIRALCEL OD-3 (Hexane:*i*PrOH = 97/3, 1.0 mL/min, 40 °C, 254 nm) 14.2 min (major), 39.8 min (minor).

**Configuration Assignment:** The absolute configuration was assigned as (*1R, 6S*) by chiral HPLC charts comparison (see, section 6).

#### Benzyl (*1R,4R,6S*)-4-methyl-6-(quinolin-2-yl)cyclohex-2-en-1-ylcarbamate (**3ab**)

86% yield (32.0 mg); colorless oil;  $[\alpha]_{\text{D}}^{23.0} = -115.0$  ( $c = 1.0$ ,  $\text{CHCl}_3$ , 91% ee);  $R_f = 0.18$  (Hexane/EtOAc = 6/1);  $^1\text{H NMR}$  (600 MHz,  $\text{CDCl}_3$ , VT50)  $\delta$  8.03 (t,  $J = 7.8$  Hz, 1H), 7.99 (d,  $J = 8.4$  Hz, 1H), 7.75 (d,  $J = 8.4$  Hz, 1H), 7.65 (t,  $J = 7.8$  Hz, 1H), 7.48 (t,  $J = 7.2$  Hz, 1H), 7.32 (d,  $J = 7.2$  Hz, 1H), 7.19-7.14 (m, 3H), 6.98 (brs, 2H), 5.89 (brs, 1H),

5.78 (d,  $J = 8.4$  Hz, 1H), 5.17 (brs, 1H), 4.74-4.56 (m, 3H), 3.42-3.36 (m, 1H), 2.37 (brs, 1H), 2.12 (brs, 1H), 1.75 (q,  $J = 12.6$  Hz, 1H), 1.11 (d,  $J = 6.6$  Hz, 3H);  $^{13}\text{C}$  NMR (150 MHz,  $\text{CDCl}_3$ )  $\delta$  162.2, 155.6, 147.9, 136.9, 136.6, 136.0, 129.4, 129.3, 128.4, 127.9, 127.8, 127.7, 127.1, 126.3, 126.0, 121.6, 66.3, 48.5, 46.5, 31.9, 31.0, 21.5; IR (ATR) 3421, 3322, 3062, 3022, 2955, 2927, 2870, 1711, 1601, 1505, 1331, 1220, 1069, 828, 772, 697  $\text{cm}^{-1}$ ; HRMS (FD+)  $m/z$ :  $[\text{M}+\text{H}]^+$  Calcd for  $\text{C}_{24}\text{H}_{24}\text{N}_2\text{O}_2$  372.18378, found: 372.18359.; HPLC analysis CHIRALCEL OD-3 (Hexane:*i*PrOH = 97/3, 1.0 mL/min, 40 °C, 254 nm) 11.2 min (major), 33.4 min (minor).

**Configuration Assignment:** The absolute configuration was assigned as (*1R, 4R, 6S*) by analogy and NOESY experiment (see, section 6).

#### 4-Bromobenzyl ((*1R, 4R, 6S*)-4-methyl-6-(quinolin-2-yl)cyclohex-2-en-1-yl)carbamate (11ab)

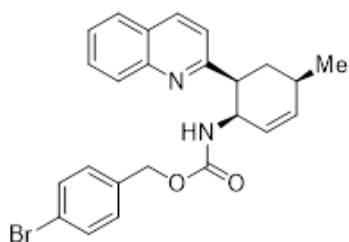

98% yield (44.3 mg); colorless oil;  $[\alpha]_{\text{D}}^{23.0} = -94.8$  ( $c = 1.0$ ,  $\text{CHCl}_3$ , 95% ee);  $R_f = 0.10$  (Hexane/EtOAc = 6/1);  $^1\text{H}$  NMR (600 MHz,  $\text{CDCl}_3$ , VT50)  $\delta$  8.01 (d,  $J = 8.4$  Hz, 1H), 7.97 (d,  $J = 8.4$  Hz, 1H), 7.75 (d,  $J = 8.4$  Hz, 1H), 7.66 (t,  $J = 7.2$  Hz, 1H), 7.50 (t,  $J = 7.2$  Hz, 1H), 7.30 (d,  $J = 7.2$  Hz, 1H), 7.20 (d,  $J = 8.4$  Hz, 2H), 6.79 (brs, 2H), 5.88 (brs, 1H), 5.78 (d,  $J = 10.2$  Hz, 1H), 5.20 (brs, 1H), 4.72-4.48 (m, 3H), 3.42-3.35 (m, 1H), 2.37 (brs, 1H), 2.11 (brs, 1H), 1.75 (q,  $J = 13.2$  Hz, 1H), 1.12 (d,  $J = 7.2$  Hz, 3H);  $^{13}\text{C}$  NMR (150 MHz,  $\text{CDCl}_3$ )  $\delta$  162.1, 155.4, 147.8, 137.0, 136.0, 135.7, 131.4, 129.4, 129.3, 127.7, 127.1, 126.2, 126.1, 121.8, 121.6, 65.3, 48.5, 46.4, 31.9, 30.9, 21.4, one carbon was not found probably due to overlapping; IR (ATR) 3421, 3322, 3019, 2955, 2925, 2870, 1713, 1601, 1505, 1332, 1235, 1071, 1011, 887, 828, 771  $\text{cm}^{-1}$ ; HRMS (FD+)  $m/z$ :  $[\text{M}+\text{H}]^+$  Calcd for  $\text{C}_{24}\text{H}_{23}\text{BrN}_2\text{O}_2$  450.09429, found: 450.09427.; HPLC analysis CHIRALCEL OD-3 (Hexane:*i*PrOH = 97/3, 1.0 mL/min, 40 °C, 254 nm) 11.5 min (major), 29.6 min (minor).

**Configuration Assignment:** The absolute configuration was assigned as (*1R, 4R, 6S*) by analogy.

#### 4-Nitrobenzyl ((*1R, 4R, 6S*)-4-methyl-6-(quinolin-2-yl)cyclohex-2-en-1-yl)carbamate (12ab)

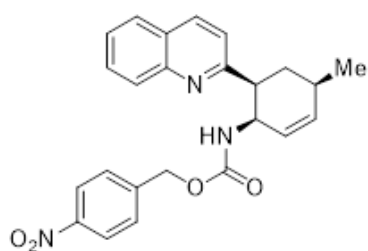

98% yield (40.9 mg); colorless oil;  $[\alpha]_{\text{D}}^{23.0} = -82.2$  ( $c = 1.0$ ,  $\text{CHCl}_3$ , 98% ee);  $R_f = 0.14$  (Hexane/EtOAc = 6/1);  $^1\text{H}$  NMR (600 MHz,  $\text{CDCl}_3$ , VT50)  $\delta$  8.07-8.00 (m, 1H), 7.99 (d,  $J = 8.4$  Hz, 1H), 7.85 (d,  $J = 8.4$  Hz, 2H), 7.74 (d,  $J = 7.2$  Hz, 1H), 7.66 (t,  $J = 7.2$  Hz, 1H), 7.50 (t,  $J = 7.2$  Hz, 1H), 7.33 (d,  $J = 7.2$  Hz, 1H), 7.03-6.93 (m, 2H), 5.92-5.86 (m, 1H), 5.81 (d,  $J = 10.2$  Hz, 1H), 5.33 (brs, 1H), 4.88 (d,  $J = 12.0$  Hz, 1H), 4.68 (d,  $J = 12.0$  Hz, 1H), 4.62 (brs, 1H), 3.42-3.37 (m, 1H), 2.38 (brs, 1H), 2.18-2.09 (m, 1H), 1.78 (q,  $J = 13.2$  Hz, 1H), 1.13 (d,  $J = 7.2$  Hz, 3H);  $^{13}\text{C}$  NMR (150 MHz,  $\text{CDCl}_3$ )  $\delta$  162.1, 155.1, 147.8, 147.3, 144.2, 137.3, 136.0, 129.4, 129.2, 127.7, 127.5, 127.0, 126.2, 126.0, 123.5, 121.8, 64.6, 48.6, 46.3, 31.9, 30.9, 21.4; IR (ATR) 3414, 3315, 3020, 2956, 2927, 2871, 1716, 1604, 1520, 1347, 1232, 1110, 1076, 1013, 829, 755  $\text{cm}^{-1}$ ; HRMS (FD+)  $m/z$ :  $[\text{M}+\text{H}]^+$  Calcd for  $\text{C}_{24}\text{H}_{23}\text{N}_3\text{O}_4$  417.16886, found: 417.16856.; HPLC analysis CHIRALCEL OD-3 (Hexane:*i*PrOH = 97/3, 1.0 mL/min, 40 °C, 254 nm) 24.0 min (major), 63.9 min (minor).

**Configuration Assignment:** The absolute configuration was assigned as (*1R, 4R, 6S*) by analogy.

#### 4-Methylbenzyl ((1*R*,4*R*,6*S*)-4-methyl-6-(quinolin-2-yl)cyclohex-2-en-1-yl)carbamate (13ab)

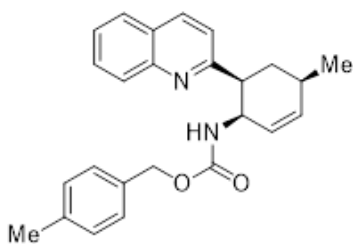

85% yield (33.2 mg); colorless oil;  $[\alpha]_{\text{D}}^{23.0} = -113.1$  ( $c = 1.0$ ,  $\text{CHCl}_3$ , 90% ee);  $R_f = 0.25$  (Hexane/EtOAc = 6/1);  $^1\text{H NMR}$  (600 MHz,  $\text{CDCl}_3$ , VT50)  $\delta$  8.03 (d,  $J = 7.8$  Hz, 1H), 7.99 (d,  $J = 8.4$  Hz, 1H), 7.74 (d,  $J = 8.4$  Hz, 1H), 7.65 (t,  $J = 6.6$  Hz, 1H), 7.47 (t,  $J = 6.6$  Hz, 1H), 7.32 (d,  $J = 7.8$  Hz, 1H), 6.95 (d,  $J = 7.2$  Hz, 2H), 6.88 (brs, 2H), 5.89 (brs, 1H), 5.77 (d,  $J = 10.2$  Hz, 1H), 5.13 (brs, 1H), 4.71-4.53 (m, 3H), 3.42-3.34 (m, 1H), 2.41-2.33 (m, 1H), 2.28 (s, 3H), 2.11 (brs, 1H), 1.74 (q,  $J = 13.2$  Hz, 1H), 1.11 (d,  $J = 7.2$  Hz, 3H);  $^{13}\text{C NMR}$  (150 MHz,  $\text{CDCl}_3$ )  $\delta$  162.2, 155.7, 147.8, 137.6, 136.8, 136.0, 133.6, 129.4, 129.2, 129.1, 128.0, 127.7, 127.1, 126.4, 125.9, 121.6, 66.2, 48.4, 46.5, 31.9, 31.0, 21.4, 21.3; IR (ATR) 3418, 3320, 3020, 2954, 2927, 2870, 1713, 1602, 1505, 1334, 1235, 1120, 1070, 1015, 829, 755  $\text{cm}^{-1}$ ; HRMS (FD+)  $m/z$ :  $[\text{M}+\text{H}]^+$  Calcd for  $\text{C}_{25}\text{H}_{26}\text{N}_2\text{O}_2$  386.19943, found: 386.19936.; HPLC analysis CHIRALCEL OD-3 (Hexane:*i*PrOH = 97/3, 1.0 mL/min, 40 °C, 254 nm) 10.2 min (major), 27.6 min (minor).

**Configuration Assignment:** The absolute configuration was assigned as (1*R*, 4*R*, 6*S*) by analogy.

#### 4-Methoxybenzyl ((1*R*,4*R*,6*S*)-4-methyl-6-(quinolin-2-yl)cyclohex-2-en-1-yl)carbamate (14ab)

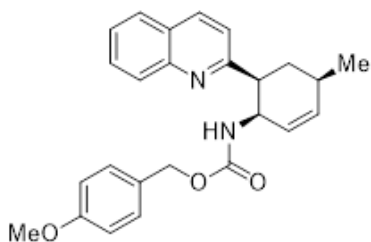

95% yield (38.3 mg); colorless oil;  $[\alpha]_{\text{D}}^{23.0} = -109.5$  ( $c = 1.0$ ,  $\text{CHCl}_3$ , 90% ee);  $R_f = 0.12$  (Hexane/EtOAc = 6/1);  $^1\text{H NMR}$  (600 MHz,  $\text{CDCl}_3$ , VT50)  $\delta$  8.03 (d,  $J = 7.8$  Hz, 1H), 7.99 (d,  $J = 7.8$  Hz, 1H), 7.75 (d,  $J = 7.8$  Hz, 1H), 7.66 (td,  $J = 7.8, 1.2$  Hz, 1H), 7.48 (td,  $J = 7.8, 1.2$  Hz, 1H), 7.32 (d,  $J = 7.8$  Hz, 1H), 6.91 (brs, 2H), 6.67 (d,  $J = 8.4$  Hz, 2H), 5.88 (brs, 1H), 5.77 (d,  $J = 10.2$  Hz, 1H), 5.11 (brs, 1H), 4.68-4.54 (m, 3H), 3.75 (s, 3H), 3.41-3.35 (m, 1H), 2.41-2.33 (m, 1H), 2.11 (brs, 1H), 1.73 (q,  $J = 14.4$  Hz, 1H), 1.11 (d,  $J = 7.2$  Hz, 3H);  $^{13}\text{C NMR}$  (150 MHz,  $\text{CDCl}_3$ )  $\delta$  162.2, 159.4, 155.7, 147.9, 136.8, 136.0, 129.6, 129.4, 129.2, 128.8, 127.7, 127.1, 126.4, 126.0, 121.6, 113.8, 66.1, 55.4, 48.4, 46.5, 31.9, 31.0, 21.5; IR (ATR) 3312, 3015, 2955, 2925, 2870, 1714, 1614, 1515, 1466, 1334, 1303, 1236, 1175, 1089, 888, 829, 771  $\text{cm}^{-1}$ ; HRMS (FD+)  $m/z$ :  $[\text{M}+\text{H}]^+$  Calcd for  $\text{C}_{25}\text{H}_{26}\text{N}_2\text{O}_3$  402.19434, found: 402.19427.; HPLC analysis CHIRALCEL OD-3 (Hexane:*i*PrOH = 96/4, 1.0 mL/min, 40 °C, 254 nm) 13.5 min (major), 33.8 min (minor).

**Configuration Assignment:** The absolute configuration was assigned as (1*R*, 4*R*, 6*S*) by analogy.

#### Benzyl ((1*R*,6*S*)-6-(6-chloroquinolin-2-yl)cyclohex-2-enyl)carbamate (3ba)

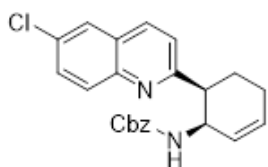

95% yield (37.3 mg); colorless oil;  $[\alpha]_{\text{D}}^{23.0} = -119.2$  ( $c = 1.0$ ,  $\text{CHCl}_3$ , 93% ee);  $R_f = 0.12$  (Hexane/EtOAc = 6/1);  $^1\text{H NMR}$  (600 MHz,  $\text{CDCl}_3$ , VT50)  $\delta$  7.93 (d,  $J = 8.4$  Hz, 1H), 7.89 (d,  $J = 8.4$  Hz, 1H), 7.71 (s, 1H), 7.56 (dd,  $J = 7.8, 1.8$  Hz, 1H), 7.34 (d,  $J = 7.8$  Hz, 1H), 7.23-7.15 (m, 3H), 7.04 (brs, 2H), 5.89 (s, 2H), 5.36 (brs, 1H), 4.81-4.73 (m, 2H), 4.67 (brs, 1H), 3.46-3.34 (m, 1H), 2.20-2.04 (m, 4H);  $^{13}\text{C NMR}$  (150 MHz,  $\text{CDCl}_3$ )  $\delta$  162.5, 156.7, 146.0, 136.6, 135.1, 131.6, 131.0, 130.1, 130.0, 128.4, 128.0, 127.9, 127.6, 127.5, 126.3, 122.3, 66.3, 48.7, 46.0, 24.8, 23.0; IR (ATR) 3421, 3332, 3029, 2937, 2836, 1719, 1599, 1493, 1455, 1335, 1307, 1234, 1058, 880, 834, 751, 697  $\text{cm}^{-1}$ ; HRMS (FD+)  $m/z$ :  $[\text{M}+\text{H}]^+$  Calcd for  $\text{C}_{23}\text{H}_{21}\text{ClN}_2\text{O}_2$  392.12915, found: 392.12919.; HPLC analysis CHIRALCEL OD-3 (Hexane:*i*PrOH = 97/3, 1.0 mL/min, 40 °C, 254 nm) 16.4 min (major), 29.6 min (minor).

**Configuration Assignment:** The absolute configuration was assigned as (*1R, 6S*) by analogy.

**Benzyl ((1*R,6S*)-6-(6-methoxyquinolin-2-yl)cyclohex-2-en-1-yl)carbamate (3ca)**

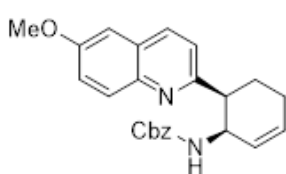

72% yield (28.0 mg); colorless oil;  $[\alpha]_D^{23.0} = -107.4$  ( $c = 1.0$ ,  $\text{CHCl}_3$ , 82% ee);  $R_f = 0.10$  (Hexane/EtOAc = 6/1);  $^1\text{H NMR}$  (600 MHz,  $\text{CDCl}_3$ , VT50)  $\delta$  7.91 (d,  $J = 9.0$  Hz, 2H), 7.32-7.26 (m, 2H), 7.22-7.16 (m, 3H), 7.07 (brs, 2H), 7.03 (d,  $J = 2.4$  Hz, 1H), 5.94-5.84 (m, 2H), 5.58 (brs, 1H), 4.87-4.73 (m, 2H), 4.64 (brs, 1H), 3.91 (s, 3H), 3.44-3.36 (m, 1H), 2.18-2.04 (m, 4H);  $^{13}\text{C NMR}$  (150 MHz,  $\text{CDCl}_3$ )  $\delta$  159.6, 157.5, 155.8, 143.7, 136.7, 135.0, 130.8, 129.8, 128.4, 128.0, 127.9, 127.8, 121.9, 121.7, 105.3, 66.3, 55.7, 48.9, 45.6, 24.8, 23.5, one carbon was not found probably due to overlapping); IR (ATR) 3414, 3331, 3028, 2938, 2907, 2836, 1715, 1625, 1602, 1500, 1456, 1382, 1331, 1231, 1162, 1114, 1058, 1029, 856, 834, 738, 698  $\text{cm}^{-1}$ ; HRMS (FD+)  $m/z$ :  $[\text{M}+\text{H}]^+$  Calcd for  $\text{C}_{24}\text{H}_{24}\text{N}_2\text{O}_3$  388.17869, found: 388.17867.; HPLC analysis CHIRALCEL OD-3 (Hexane:*i*PrOH = 97/3, 1.0 mL/min, 40 °C, 254 nm) 17.2 min (major), 28.2 min (minor).

**Configuration Assignment:** The absolute configuration was assigned as (*1R, 6S*) by analogy.

**Benzyl ((1*R,6S*)-6-(5-bromoquinolin-2-yl)cyclohex-2-en-1-yl)carbamate (3da)**

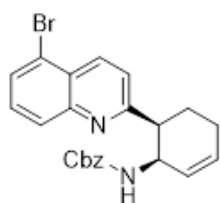

97% yield (42.4 mg); colorless oil;  $[\alpha]_D^{23.0} = -98.6$  ( $c = 1.0$ ,  $\text{CHCl}_3$ , 86% ee);  $R_f = 0.14$  (Hexane/EtOAc = 6/1);  $^1\text{H NMR}$  (600 MHz,  $\text{CDCl}_3$ , VT50)  $\delta$  8.39 (d,  $J = 8.4$  Hz, 1H), 7.98 (d,  $J = 8.4$  Hz, 1H), 7.75 (d,  $J = 7.2$  Hz, 1H), 7.48 (t,  $J = 8.4$  Hz, 1H), 7.43 (d,  $J = 8.4$  Hz, 1H), 7.21-7.16 (m, 3H), 7.04 (brs, 2H), 5.89 (s, 2H), 5.40 (brs, 1H), 4.86-4.75 (m, 2H), 4.70 (brs, 1H), 3.51-3.40 (m, 1H), 2.21-2.05 (m, 4H);  $^{13}\text{C NMR}$  (150 MHz,  $\text{CDCl}_3$ )  $\delta$  163.0, 155.7, 148.3, 136.6, 135.5, 130.0, 129.8, 129.5, 129.3, 128.4, 128.0, 127.9, 127.7, 126.5, 122.6, 121.9, 66.4, 48.6, 45.9, 24.8, 23.2; IR (ATR) 3418, 3325, 3062, 3027, 2927, 1719, 1593, 1552, 1496, 1455, 1394, 1332, 1235, 1120, 1057, 999, 951, 815, 759, 697  $\text{cm}^{-1}$ ; HRMS (FD+)  $m/z$ :  $[\text{M}+\text{H}]^+$  Calcd for  $\text{C}_{23}\text{H}_{21}\text{BrN}_2\text{O}_2$  436.07864, found: 436.07846.; HPLC analysis CHIRALCEL OD-3 (Hexane:*i*PrOH = 97/3, 1.0 mL/min, 40 °C, 254 nm) 11.1 min (major), 23.3 min (minor).

**Configuration Assignment:** The absolute configuration was assigned as (*1R, 6S*) by analogy.

**Benzyl ((1*R,6S*)-6-(benzo[*f*]quinolin-3-yl)cyclohex-2-en-1-yl)carbamate (3ea)**

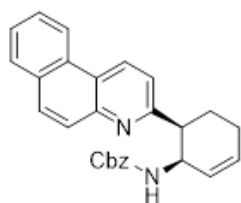

63% yield (25.7 mg); colorless oil;  $[\alpha]_D^{23.0} = -124.5$  ( $c = 1.0$ ,  $\text{CHCl}_3$ , 85% ee);  $R_f = 0.12$  (Hexane/EtOAc = 6/1);  $^1\text{H NMR}$  (600 MHz,  $\text{CDCl}_3$ , VT50)  $\delta$  8.79 (d,  $J = 8.4$  Hz, 1H), 8.56 (d,  $J = 7.8$  Hz, 1H), 7.96-7.89 (m, 3H), 7.67 (td,  $J = 7.2, 1.2$  Hz, 1H), 7.62 (td,  $J = 7.2, 1.2$  Hz, 1H), 7.48 (d,  $J = 7.8$  Hz, 1H), 7.14-7.06 (m, 3H), 7.02 (brs, 2H), 5.96-5.88 (m, 2H), 5.55 (brs, 1H), 4.84-4.73 (m, 2H), 4.70 (brs, 1H), 3.55-3.41 (m, 1H), 2.28-2.07 (m, 4H);  $^{13}\text{C NMR}$  (150 MHz,  $\text{CDCl}_3$ )  $\delta$  161.7, 155.8, 147.5, 136.7, 131.7, 130.9, 130.6, 129.9, 129.8, 128.7, 128.5, 128.3, 127.9, 127.0, 123.8, 122.7, 121.3, 66.3, 48.9, 45.6, 24.9, 23.4, three carbons were not found probably due to overlapping); IR (ATR) 3414, 3322, 3060, 3029, 2922, 2833, 1714, 1498, 1456, 1335, 1235, 1087, 1063, 874, 834, 752, 698  $\text{cm}^{-1}$ ; HRMS (FD+)  $m/z$ :  $[\text{M}+\text{H}]^+$  Calcd for  $\text{C}_{27}\text{H}_{24}\text{N}_2\text{O}_2$  408.18378, found: 408.18359.; HPLC analysis CHIRALCEL OD-3 (Hexane:*i*PrOH = 97/3, 1.0 mL/min, 40 °C, 254 nm) 17.7 min (major), 37.1 min (minor).

**Configuration Assignment:** The absolute configuration was assigned as (*1R, 6S*) by analogy.

**Benzyl ((1*R,6S*)-6-(6-bromo-4-chloroquinolin-2-yl)cyclohex-2-en-1-yl)carbamate (3fa)**

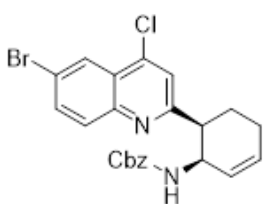

83% yield (39.2 mg); white solid;  $[\alpha]_{\text{D}}^{23.0} = -115.4$  ( $c = 1.0$ ,  $\text{CHCl}_3$ , 91% ee);  $R_f = 0.20$  (Hexane/EtOAc = 6/1); Mp: 253.2-255.4 °C;  $^1\text{H NMR}$  (600 MHz,  $\text{CDCl}_3$ , VT50)  $\delta$  8.31 (brs, 1H), 7.86 (d,  $J = 9.0$  Hz, 1H), 7.74 (dd,  $J = 9.0, 1.8$  Hz, 1H), 7.45 (s, 1H), 7.23-7.17 (m, 3H), 7.06 (brs, 2H), 5.92-5.84 (m, 2H), 5.25 (brs, 1H), 4.83-4.74 (m, 2H), 4.66 (brs, 1H), 3.42-3.31 (m, 1H), 2.21-1.98 (m, 4H);  $^{13}\text{C NMR}$  (150 MHz,  $\text{CDCl}_3$ )  $\delta$  162.8, 155.6, 147.0, 141.2, 136.4, 133.7, 131.4, 130.1, 128.5, 128.0, 127.4, 126.4, 122.1, 121.2, 66.3, 48.5, 46.2, 24.8, 23.0, two carbons were not found probably due to overlapping; IR (ATR) 3422, 3319, 3064, 3029, 2935, 2835, 1704, 1587, 1546, 1498, 1478, 1455, 1335, 1311, 1235, 1059, 988, 875, 828, 755, 698  $\text{cm}^{-1}$ ; HRMS (FD+)  $m/z$ :  $[\text{M}+\text{H}]^+$  Calcd for  $\text{C}_{23}\text{H}_{20}\text{BrClN}_2\text{O}_2$  470.03967, found: 470.03946.; HPLC analysis CHIRALCEL OD-3 (Hexane:*i*PrOH = 97/3, 1.0 mL/min, 40 °C, 254 nm) 10.1 min (major), 20.3 min (minor).

**Configuration Assignment:** The absolute configuration was assigned as (*1R, 6S*) by analogy.

**Benzyl ((1*R,6S*)-6-(7-fluoroquinolin-2-yl)cyclohex-2-en-1-yl)carbamate (3ga)**

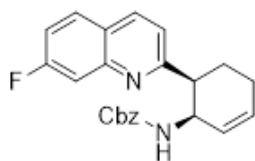

96% yield (36.1 mg); colorless oil;  $[\alpha]_{\text{D}}^{23.0} = -104.4$  ( $c = 1.0$ ,  $\text{CHCl}_3$ , 87% ee);  $R_f = 0.12$  (Hexane/EtOAc = 6/1);  $^1\text{H NMR}$  (600 MHz,  $\text{CDCl}_3$ , VT50)  $\delta$  7.98 (d,  $J = 8.4$  Hz, 1H), 7.72 (dd,  $J = 8.4, 6.0$  Hz, 1H), 7.64 (d,  $J = 8.4$  Hz, 1H), 7.30 (d,  $J = 8.4$  Hz, 1H), 7.26 (td,  $J = 8.4, 1.8$  Hz, 1H), 7.22-7.16 (m, 3H), 7.05 (brs, 2H), 5.89 (s, 2H), 5.42 (brs, 1H), 4.86-4.73 (m, 2H), 4.67 (brs, 1H), 3.48-3.35 (m, 1H), 2.23-2.01 (m, 4H);  $^{19}\text{F NMR}$  (565 MHz,  $\text{CDCl}_3$ , VT50)  $\delta$  -110.4 (s, 1F);  $^{13}\text{C NMR}$  (150 MHz,  $\text{CDCl}_3$ )  $\delta$  163.1 (d, C-F,  $J_{\text{C-F}} = 250.0$  Hz), 163.4, 155.7, 148.6 (d, C-F,  $J_{\text{C-F}} = 13.0$  Hz), 136.6, 135.9, 130.0, 129.6 (d, C-F,  $J_{\text{C-F}} = 8.8$  Hz), 128.4, 128.0, 127.9, 127.7, 123.9, 120.9, 116.4 (d, C-F,  $J_{\text{C-F}} = 24.6$  Hz), 113.1 (d, C-F,  $J_{\text{C-F}} = 20.2$  Hz), 66.4, 48.7, 46.0, 24.8, 23.2; IR (ATR) 3414, 3324, 3066, 3029, 2924, 2835, 1713, 1627, 1602, 1510, 1455, 1433, 1335, 1236, 1212, 1165, 1086, 1059, 968, 871, 847, 751, 698  $\text{cm}^{-1}$ ; HRMS (FD+)  $m/z$ :  $[\text{M}+\text{H}]^+$  Calcd for  $\text{C}_{23}\text{H}_{21}\text{FN}_2\text{O}_2$  376.15871, found: 376.15870.; HPLC analysis CHIRALCEL OD-3 (Hexane:*i*PrOH = 97/3, 1.0 mL/min, 40 °C, 254 nm) 12.6 min (major), 19.8 min (minor).

**Configuration Assignment:** The absolute configuration was assigned as (*1R, 6S*) by analogy.

**Benzyl ((1*R,6S*)-6-(7-chloroquinolin-2-yl)cyclohex-2-enyl)carbamate (3ha)**

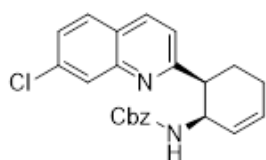

79% yield (31.0 mg); colorless oil;  $[\alpha]_{\text{D}}^{23.0} = -51.9$  ( $c = 1.0$ ,  $\text{CHCl}_3$ , 49% ee);  $R_f = 0.10$  (Hexane/EtOAc = 6/1);  $^1\text{H NMR}$  (600 MHz,  $\text{CDCl}_3$ , VT50)  $\delta$  8.02 (brs, 1H), 7.97 (d,  $J = 8.4$  Hz, 1H), 7.67 (d,  $J = 8.4$  Hz, 1H), 7.43 (d,  $J = 8.4$  Hz, 1H), 7.33 (d,  $J = 7.8$  Hz, 1H), 7.23-7.17 (m, 3H), 7.05 (brs, 2H), 5.89 (s, 2H), 5.39 (brs, 1H), 4.84-4.71 (m, 2H), 4.67 (brs, 1H), 3.48-3.34 (m, 1H), 2.28-2.00 (m, 4H);  $^{13}\text{C NMR}$  (150 MHz,  $\text{CDCl}_3$ )  $\delta$  163.3, 155.7, 148.0, 136.5, 135.8, 135.1, 130.0, 128.9, 128.4, 128.3, 128.0, 127.7, 127.0, 125.3, 121.8, 66.4, 48.7, 46.0, 24.8, 23.2; IR (ATR) 3421, 3322, 3029, 2937, 2836, 1719, 1614, 1497, 1337, 1236, 1060, 883, 848, 735, 697  $\text{cm}^{-1}$ ; HRMS (FD+)  $m/z$ :  $[\text{M}+\text{H}]^+$  Calcd for  $\text{C}_{23}\text{H}_{21}\text{ClN}_2\text{O}_2$  392.12915, found: 392.12900.; HPLC analysis CHIRALCEL OD-3 (Hexane:*i*PrOH = 97/3,



1.0 mL/min, 40 °C, 254 nm) 15.8 min (major), 26.0 min (minor).

**Configuration Assignment:** The absolute configuration was assigned as (*1R, 6S*) by analogy.

**Benzyl ((1*R,4R,6S*)-4-hexyl-6-(quinolin-2-yl)cyclohex-2-en-1-yl)carbamate (3ac)**

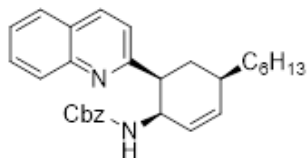

89% yield (39.3 mg); colorless oil;  $[\alpha]_{\text{D}}^{23.0} = -116.8$  ( $c = 1.0$ ,  $\text{CHCl}_3$ , 93% ee);  $R_f = 0.30$  (Hexane/EtOAc = 6/1);  $^1\text{H NMR}$  (600 MHz,  $\text{CDCl}_3$ , VT50)  $\delta$  8.04 (d,  $J = 8.4$  Hz, 1H), 7.99 (d,  $J = 8.4$  Hz, 1H), 7.75 (t,  $J = 7.2$  Hz, 1H), 7.65 (t,  $J = 7.2$  Hz, 1H), 7.48 (t,  $J = 7.2$  Hz, 1H), 7.32 (d,  $J = 7.8$  Hz, 1H), 7.21-7.09 (m, 3H), 6.98 (brs, 2H), 5.91 (brs, 1H), 5.83 (d,  $J = 9.6$  Hz, 1H), 5.27-5.09 (m, 1H), 4.80-4.64 (m, 2H), 4.60 (brs, 1H), 3.41-3.34 (m, 1H), 2.26 (brs, 1H), 2.19-2.04 (m, 1H), 1.76 (q,  $J = 13.8$  Hz, 1H), 1.51-1.36 (m, 4H), 1.35-1.25 (m, 6H), 0.89 (t,  $J = 7.2$  Hz, 3H);  $^{13}\text{C NMR}$  (150 MHz,  $\text{CDCl}_3$ )  $\delta$  162.4, 155.6, 147.9, 136.7, 136.0, 135.9, 129.4, 129.3, 128.4, 127.9, 127.8, 127.7, 127.1, 126.6, 126.0, 121.6, 66.3, 48.8, 46.5, 36.9, 36.0, 32.0, 29.6, 28.8, 26.8, 22.8, 14.2; IR (ATR) 3312, 3062, 3031, 2954, 2925, 2854, 1708, 1602, 1505, 1456, 1337, 1220, 1083, 828, 771, 697  $\text{cm}^{-1}$ ; HRMS (FD+)  $m/z$ :  $[\text{M}+\text{H}]^+$  Calcd for  $\text{C}_{29}\text{H}_{34}\text{N}_2\text{O}_2$  442.26203, found: 442.26177.; HPLC analysis CHIRALCEL OD-3 (Hexane:*i*PrOH = 98/2, 1.0 mL/min, 40 °C, 254 nm) 12.0 min (major), 28.4 min (minor).

**Configuration Assignment:** The absolute configuration was assigned as (*1R, 4R, 6S*) by analogy.

**Benzyl ((1*R,6S*)-3-methyl-6-(quinolin-2-yl)cyclohex-2-en-1-yl)carbamate (3ad)**

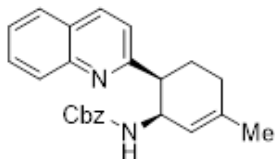

87% yield (32.5 mg); colorless oil;  $[\alpha]_{\text{D}}^{23.0} = -148.2$  ( $c = 1.0$ ,  $\text{CHCl}_3$ , 96% ee);  $R_f = 0.16$  (Hexane/EtOAc = 6/1);  $^1\text{H NMR}$  (600 MHz,  $\text{CDCl}_3$ , VT50)  $\delta$  8.02 (d,  $J = 8.4$  Hz, 1H), 7.99 (d,  $J = 8.4$  Hz, 1H), 7.74 (d,  $J = 7.8$  Hz, 1H), 7.64 (t,  $J = 7.2$  Hz, 1H), 7.47 (t,  $J = 7.2$  Hz, 1H), 7.33 (d,  $J = 7.8$  Hz, 1H), 7.21-7.13 (m, 3H), 7.03 (brs, 2H), 5.64 (s, 1H), 5.42 (brs, 1H), 4.90-4.69 (m, 2H), 4.64 (brs, 1H), 3.39-3.32 (m, 1H), 2.22-2.00 (m, 4H), 1.73 (s, 3H);  $^{13}\text{C NMR}$  (150 MHz,  $\text{CDCl}_3$ )  $\delta$  162.4, 155.8, 147.7, 137.8, 136.8, 136.0, 129.4, 129.3, 128.4, 127.9, 127.8, 127.7, 127.0, 126.0, 122.2, 121.5, 66.2, 49.2, 45.8, 30.0, 23.6, 23.4; IR (ATR) 3418, 3331, 3038, 2930, 2910, 2829, 1719, 1601, 1504, 1454, 1334, 1234, 1057, 1026, 968, 830, 752, 698  $\text{cm}^{-1}$ ; HRMS (FD+)  $m/z$ :  $[\text{M}+\text{H}]^+$  Calcd for  $\text{C}_{24}\text{H}_{24}\text{N}_2\text{O}_2$  372.18378, found: 372.18375.; HPLC analysis CHIRALCEL OD-3 (Hexane:*i*PrOH = 96/4, 1.0 mL/min, 40 °C, 254 nm) 11.6 min (major), 35.5 min (minor).

**Configuration Assignment:** The absolute configuration was assigned as (*1R, 6S*) by analogy.

#### 4-Nitrobenzyl ((*1R,6S*)-6-(quinolin-2-yl)cyclohex-2-en-1-yl)carbamate (**12aa**)

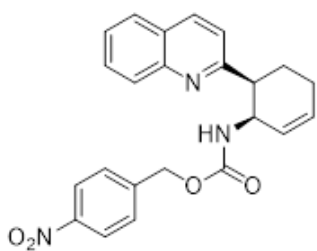

99% yield (40.0 mg); pale yellow oil;  $[\alpha]_{\text{D}}^{23.0} = -107.8$  ( $c = 1.0$ ,  $\text{CHCl}_3$ , 98% ee);  $R_f = 0.22$  (Hexane/EtOAc = 3/1);  $^1\text{H NMR}$  (600 MHz,  $\text{CDCl}_3$ , VT50)  $\delta$  8.01 (d,  $J = 8.4$  Hz, 2H), 7.90 (d,  $J = 8.4$  Hz, 2H), 7.75 (d,  $J = 7.2$  Hz, 1H), 7.66 (t,  $J = 7.2$  Hz, 1H), 7.50 (t,  $J = 7.2$  Hz, 1H), 7.34 (d,  $J = 7.2$  Hz, 1H), 7.07 (brs, 2H), 5.92 (s, 2H), 5.72 (brs, 1H), 4.93 (d,  $J = 12.6$  Hz, 1H), 4.78 (d,  $J = 12.6$  Hz, 1H), 4.68 (s, 1H), 3.48-3.40 (m, 1H), 2.32-1.96 (m, 4H);  $^{13}\text{C NMR}$  (150 MHz,  $\text{CDCl}_3$ )  $\delta$  162.2, 155.3, 147.8, 147.6, 144.3, 136.1, 130.1, 129.4, 127.8, 127.6, 127.1, 126.3, 123.6, 121.6, 64.8, 49.0, 45.8, 24.9, 23.4, two carbons were not found probably due to overlapping; IR (ATR) 3411, 3322, 3062, 3026, 2934, 2876, 2836, 1715, 1603, 1520, 1428, 1346, 1234, 1114, 1062, 1002, 829, 756  $\text{cm}^{-1}$ ; HRMS (FD+)  $m/z$ :  $[\text{M}+\text{H}]^+$  Calcd for  $\text{C}_{23}\text{H}_{21}\text{N}_3\text{O}_4$  403.15321, found: 403.15312.; HPLC analysis CHIRALCEL OD-3 (Hexane:*i*PrOH = 96/4, 1.0 mL/min, 40°C, 254 nm) 23.7 min (major), 46.8 min (minor).

**Configuration Assignment:** The absolute configuration was assigned as (*1R, 6S*) by analogy.

#### 4-Nitrobenzyl ((*1R,6S*)-6-(6-chloroquinolin-2-yl)cyclohex-2-en-1-yl)carbamate (**12ba**)

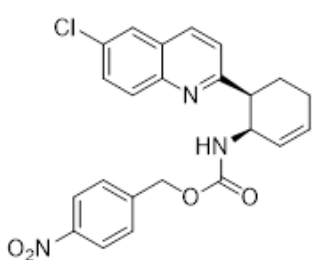

99% yield (43.4 mg); colorless oil;  $[\alpha]_{\text{D}}^{23.0} = -105.8$  ( $c = 1.0$ ,  $\text{CHCl}_3$ , 99% ee);  $R_f = 0.16$  (Hexane/EtOAc = 3/1);  $^1\text{H NMR}$  (600 MHz,  $\text{CDCl}_3$ , VT50)  $\delta$  7.99 (d,  $J = 8.4$  Hz, 2H), 7.93 (d,  $J = 8.4$  Hz, 2H), 7.74 (s, 1H), 7.59 (d,  $J = 8.4$  Hz, 1H), 7.37 (d,  $J = 8.4$  Hz, 1H), 7.14 (brs, 2H), 5.97-5.87 (m, 2H), 5.55 (brs, 1H), 4.89-4.77 (m, 2H), 4.66 (brs, 1H), 3.47-3.37 (m, 1H), 2.40-1.96 (m, 4H);  $^{13}\text{C NMR}$  (150 MHz,  $\text{CDCl}_3$ )  $\delta$  162.5, 155.2, 147.5, 146.0, 144.2, 135.2, 131.9, 130.9, 130.4, 130.3, 127.8, 127.5, 127.4, 126.3, 123.6, 122.5, 64.8, 48.9, 45.9, 24.9, 23.0; IR (ATR) 3240, 3026, 2937, 2877, 1719, 1600, 1521, 1492, 1346, 1238, 1176, 1062, 1009, 836, 752  $\text{cm}^{-1}$ ; HRMS (FD+)  $m/z$ :  $[\text{M}+\text{H}]^+$  Calcd for  $\text{C}_{23}\text{H}_{20}\text{ClN}_3\text{O}_4$  437.11423, found: 437.11427.; HPLC analysis CHIRALCEL OD-3 (Hexane:*i*PrOH = 96/4, 1.0 mL/min, 40 °C, 254 nm) 24.8 min (major), 36.2 min (minor).

**Configuration Assignment:** The absolute configuration was assigned as (*1R, 6S*) by analogy.

#### 4-Nitrobenzyl ((*1R,6S*)-6-(6-methoxyquinolin-2-yl)cyclohex-2-en-1-yl)carbamate (**12ca**)

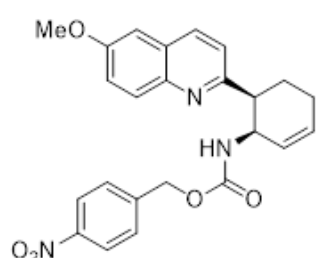

92% yield (39.7 mg); pale yellow oil;  $[\alpha]_{\text{D}}^{23.0} = -89.0$  ( $c = 1.0$ ,  $\text{CHCl}_3$ , 96% ee);  $R_f = 0.10$  (Hexane/EtOAc = 3/1);  $^1\text{H NMR}$  (600 MHz,  $\text{CDCl}_3$ , VT50)  $\delta$  7.90 (dd,  $J = 9.0$ , 9.0 Hz, 4H), 7.32 (d,  $J = 8.4$  Hz, 1H), 7.28 (d,  $J = 8.4$  Hz, 1H), 7.11-6.93 (m, 3H), 5.91 (s, 2H), 5.70 (brs, 1H), 4.97 (d,  $J = 12.6$  Hz, 1H), 4.78 (d,  $J = 12.6$  Hz, 1H), 4.64 (brs, 1H), 3.94 (s, 3H), 3.43-3.36 (m, 1H), 2.30-1.95 (m, 4H);  $^{13}\text{C NMR}$  (150 MHz,  $\text{CDCl}_3$ )  $\delta$  159.5, 157.6, 155.3, 147.3, 144.5, 143.7, 135.0, 130.7, 130.2, 127.9, 127.5, 123.5, 122.1, 121.8, 105.1, 64.6, 55.7, 48.9, 45.5, 25.0, 23.1, one carbon was not found probably due to overlapping; IR (ATR) 3414, 3331, 3026, 2939, 2907, 2837, 1716, 1625, 1603, 1520, 1502, 1347, 1232, 1113, 1063, 1029, 856, 836, 738  $\text{cm}^{-1}$ ; HRMS (FD+)  $m/z$ :  $[\text{M}+\text{H}]^+$  Calcd for  $\text{C}_{24}\text{H}_{23}\text{N}_3\text{O}_5$  433.16377, found: 433.16372; HPLC analysis CHIRALCEL OD-3 (Hexane:*i*PrOH = 96/4, 1.0 mL/min, 40 °C, 254 nm) 27.8 min (major), 44.5 min (minor).

**Configuration Assignment:** The absolute configuration was assigned as (*1R, 6S*) by analogy.

**4-Nitrobenzyl ((1*R, 6S*)-6-(5-bromoquinolin-2-yl)cyclohex-2-en-1-yl)carbamate (12da)**

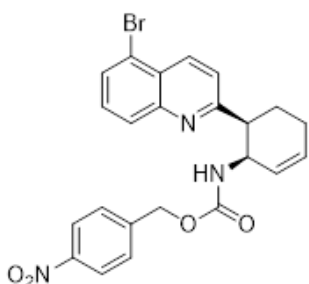

97% yield (46.7 mg); colorless oil;  $[\alpha]_{\text{D}}^{23.0} = -102.7$  ( $c = 1.0$ ,  $\text{CHCl}_3$ , 98% ee);  $R_f = 0.14$  (Hexane/EtOAc= 3/1);  $^1\text{H NMR}$  (600 MHz,  $\text{CDCl}_3$ , VT50)  $\delta$  8.38 (d,  $J = 7.8$  Hz, 1H), 8.01-7.90 (m, 3H), 7.77 (d,  $J = 7.8$  Hz, 1H), 7.49 (t,  $J = 7.8$  Hz, 1H), 7.44 (d,  $J = 7.8$  Hz, 1H), 7.10 (brs, 2H), 5.97-5.87 (m, 2H), 5.51 (brs, 1H), 4.93 (d,  $J = 13.2$  Hz, 1H), 4.78 (d,  $J = 13.2$  Hz, 1H), 4.70 (brs, 1H), 3.52-3.40 (m, 1H), 2.30-2.08 (m, 4H);  $^{13}\text{C NMR}$  (150 MHz,  $\text{CDCl}_3$ )  $\delta$  163.0, 155.2, 148.3, 147.4, 144.1, 135.4, 130.5, 129.9, 129.6, 129.2, 127.7, 127.3, 126.4, 123.6, 122.8, 122.0, 64.8, 48.8, 45.8, 24.9, 22.9; IR (ATR) 3414, 3325, 3026, 2922, 2833, 1720, 1608, 1553, 1521, 1394, 1347, 1235, 1087, 1063, 883, 858, 816, 761  $\text{cm}^{-1}$ ; HRMS (FD+)  $m/z$ :  $[\text{M}+\text{H}]^+$  Calcd for  $\text{C}_{23}\text{H}_{20}\text{BrN}_3\text{O}_4$  481.06372, found: 481.06361.; HPLC analysis CHIRALCEL OD-3 (Hexane:*i*PrOH = 96/4, 1.0 mL/min, 40 °C, 254 nm) 25.8 min (major), 57.5 min (minor).

**Configuration Assignment:** The absolute configuration was assigned as (*1R, 6S*) by analogy.

**4-Nitrobenzyl ((1*R, 6S*)-6-(benzo[*f*]quinolin-3-yl)cyclohex-2-en-1-yl)carbamate (12ea)**

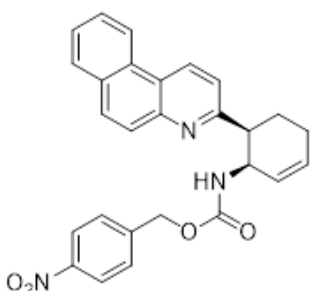

96% yield (43.6 mg); white solid;  $[\alpha]_{\text{D}}^{23.0} = -141.3$  ( $c = 1.0$ ,  $\text{CHCl}_3$ , 98% ee);  $R_f = 0.16$  (Hexane/EtOAc= 3/1); Mp: 160.7-162.5 °C;  $^1\text{H NMR}$  (600 MHz,  $\text{CDCl}_3$ , VT50)  $\delta$  8.79 (d,  $J = 7.8$  Hz, 1H), 8.54 (d,  $J = 7.8$  Hz, 1H), 7.96-7.86 (m, 3H), 7.84-7.73 (m, 2H), 7.68 (t,  $J = 7.8$  Hz, 1H), 7.64 (t,  $J = 7.8$  Hz, 1H), 7.48 (d,  $J = 7.2$  Hz, 1H), 7.03 (brs, 2H), 5.94 (s, 2H), 5.68 (brs, 1H), 4.91 (d,  $J = 11.4$  Hz, 1H), 4.74 (d,  $J = 11.4$  Hz, 1H), 4.69 (s, 1H), 3.54-3.42 (m, 1H), 2.32-2.04 (m, 4H);  $^{13}\text{C NMR}$  (150 MHz,  $\text{CDCl}_3$ )  $\delta$  161.6, 155.3, 147.5, 147.3, 144.2, 131.6, 130.9, 130.8, 130.3, 129.7, 128.8, 128.3, 127.6, 127.5, 127.3, 123.8, 123.5, 122.5, 121.5, 64.7, 49.0, 45.5, 25.0, 23.1, one carbon was not found probably due to overlapping; IR (ATR) 3411, 3326, 3060, 3027, 2922, 2836, 1719, 1606, 1520, 1346, 1235, 1087, 1063, 834, 752  $\text{cm}^{-1}$ ; HRMS (FD+)  $m/z$ :  $[\text{M}+\text{H}]^+$  Calcd for  $\text{C}_{27}\text{H}_{23}\text{N}_3\text{O}_4$  453.16886, found: 453.16875.; HPLC analysis CHIRALCEL OD-3 (Hexane:*i*PrOH = 96/4, 1.0 mL/min, 40 °C, 254 nm) 37.0 min (major), 72.6 min (minor).

**Configuration Assignment:** The absolute configuration was assigned as (*1R, 6S*) by analogy.

**4-Nitrobenzyl ((1*R, 6S*)-6-(6-bromo-4-chloroquinolin-2-yl)cyclohex-2-en-1-yl)carbamate (12fa)**

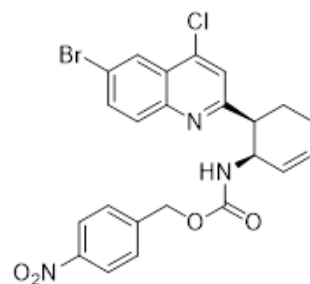

86% yield (44.3 mg); white solid;  $[\alpha]_{\text{D}}^{23.0} = -121.1$  ( $c = 1.0$ ,  $\text{CHCl}_3$ , 99% ee);  $R_f = 0.30$  (Hexane/EtOAc= 3/1); Mp: 131.6-133.9 °C;  $^1\text{H NMR}$  (600 MHz,  $\text{CDCl}_3$ , VT50)  $\delta$  8.31 (s, 1H), 8.01 (d,  $J = 8.4$  Hz, 2H), 7.87 (d,  $J = 8.4$  Hz, 1H), 7.76 (d,  $J = 8.4$  Hz, 1H), 7.46 (s, 1H), 7.18 (brs, 2H), 5.97-5.85 (m, 2H), 5.40 (brs, 1H), 4.99-4.77 (m, 2H), 4.66 (brs, 1H), 3.44-3.32 (m, 1H), 2.34-1.95 (m, 4H);  $^{13}\text{C NMR}$  (150 MHz,  $\text{CDCl}_3$ )  $\delta$  162.7, 155.1, 147.5, 146.9, 144.0, 141.2, 133.9, 131.3, 130.5, 127.9, 127.1, 126.4, 126.3, 123.6, 122.2, 121.3, 64.9, 48.7, 46.0, 24.8, 22.9; IR (ATR) 3418, 3322, 3080, 3027, 2940, 2836, 1720, 1606, 1587, 1520, 1477, 1346, 1234, 1063, 853, 829, 753  $\text{cm}^{-1}$ ; HRMS (FD+)  $m/z$ :

[M+H]<sup>+</sup> Calcd for C<sub>23</sub>H<sub>19</sub>BrClN<sub>3</sub>O<sub>4</sub> 515.02475, found: 515.02440.; HPLC analysis CHIRALCEL OD-3 (Hexane:*i*PrOH = 95/5, 1.0 mL/min, 40 °C, 254 nm) 18.0 min (major), 33.2 min (minor).

**Configuration Assignment:** The absolute configuration was assigned as (*1R, 6S*) by analogy.

#### 4-Nitrobenzyl ((*1R, 6S*)-6-(7-fluoroquinolin-2-yl)cyclohex-2-en-1-yl)carbamate (**12ga**)

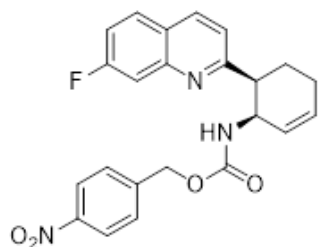

99% yield (41.5 mg); colorless oil; [ $\alpha$ ]<sub>D</sub><sup>23.0</sup> = -95.4 (*c* = 1.0, CHCl<sub>3</sub>, 98% ee); R<sub>f</sub> = 0.20 (Hexane/EtOAc = 3/1); <sup>1</sup>H NMR (600 MHz, CDCl<sub>3</sub>, VT50)  $\delta$  7.99 (d, *J* = 8.4 Hz, 1H), 7.96 (d, *J* = 8.4 Hz, 2H), 7.73 (t, *J* = 7.2 Hz, 1H), 7.62 (d, *J* = 8.4 Hz, 1H), 7.34-7.26 (m, 2H), 7.13 (d, *J* = 7.2 Hz, 2H), 5.95-5.86 (m, 2H), 5.58 (brs, 1H), 4.91 (d, *J* = 13.2 Hz, 1H), 4.80 (d, *J* = 13.2 Hz, 1H), 4.66 (brs, 1H), 3.45-3.38 (m, 1H), 2.24-1.96 (m, 4H); <sup>19</sup>F NMR (565 MHz, CDCl<sub>3</sub>, VT50)  $\delta$  -109.9 (s, 1F); <sup>13</sup>C NMR (150 MHz, CDCl<sub>3</sub>)  $\delta$  163.1 (d, C-F, *J*<sub>C-F</sub> = 247.0 Hz), 163.3, 155.2, 148.5 (d, C-F, *J*<sub>C-F</sub> = 12.9 Hz), 147.4, 144.2, 136.0, 130.3, 129.6 (d, C-F, *J*<sub>C-F</sub> = 8.6 Hz), 127.8, 127.4, 123.9, 123.6, 121.0, 116.6 (d, C-F, *J*<sub>C-F</sub> = 18.8 Hz), 112.9 (d, C-F, *J*<sub>C-F</sub> = 18.8 Hz), 64.7, 48.8, 45.9, 24.9, 23.0; IR (ATR) 3405, 3324, 3027, 2925, 1714, 1626, 1604, 1511, 1432, 1346, 1235, 1165, 1110, 1086, 1062, 846, 754 cm<sup>-1</sup>; HRMS (FD+) *m/z*: [M+H]<sup>+</sup> Calcd for C<sub>23</sub>H<sub>20</sub>FN<sub>3</sub>O<sub>4</sub> 421.14378, found: 421.14374; HPLC analysis CHIRALCEL OD-3 (Hexane:*i*PrOH = 96/4, 1.0 mL/min, 40 °C, 254 nm) 23.3 min (major), 37.1 min (minor).

**Configuration Assignment:** The absolute configuration was assigned as (*1R, 6S*) by analogy.

#### 4-Nitrobenzyl ((*1R, 6S*)-6-(7-chloroquinolin-2-yl)cyclohex-2-en-1-yl)carbamate (**12ha**)

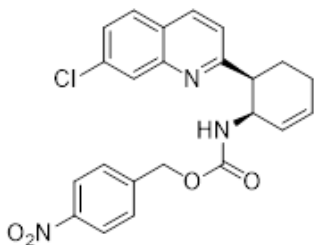

85% yield (37.1 mg); colorless oil; [ $\alpha$ ]<sub>D</sub><sup>23.0</sup> = -68.1 (*c* = 1.0, CHCl<sub>3</sub>, 92% ee); R<sub>f</sub> = 0.15 (Hexane/EtOAc = 3/1); <sup>1</sup>H NMR (600 MHz, CDCl<sub>3</sub>, VT50)  $\delta$  8.01 (brs, 1H), 7.99-7.94 (m, 3H), 7.67 (d, *J* = 8.4 Hz, 1H), 7.45 (d, *J* = 7.8 Hz, 1H), 7.34 (d, *J* = 7.8 Hz, 1H), 7.19-7.05 (m, 2H), 5.95-5.87 (m, 2H), 5.55 (brs, 1H), 4.90 (d, *J* = 12.6 Hz, 1H), 4.78 (d, *J* = 12.6 Hz, 1H), 4.66 (s, 1H), 3.44-3.39 (m, 1H), 2.19-2.00 (m, 4H); <sup>13</sup>C NMR (150 MHz, CDCl<sub>3</sub>)  $\delta$  163.3, 155.2, 147.9, 147.4, 144.1, 135.9, 135.3, 130.4, 128.9, 128.3, 127.9, 127.3, 127.2, 125.3, 123.6, 122.0, 64.8, 48.8, 45.9, 24.8, 23.0; IR (ATR) 3422, 3333, 3079, 3026, 2929, 2836, 1719, 1612, 1520, 1498, 1347, 1235, 1086, 1065, 881, 847, 768 cm<sup>-1</sup>; HRMS (FD+) *m/z*: [M+H]<sup>+</sup> Calcd for C<sub>23</sub>H<sub>20</sub>ClN<sub>3</sub>O<sub>4</sub> 437.11423, found: 437.11421.; HPLC analysis CHIRALCEL OD-3 (Hexane:*i*PrOH = 96/4, 1.0 mL/min, 40 °C, 254 nm) 27.7 min (major), 45.1 min (minor).

**Configuration Assignment:** The absolute configuration was assigned as (*1R, 6S*) by analogy.

#### 4-Nitrobenzyl ((*1R,4R,6S*)-4-hexyl-6-(quinolin-2-yl)cyclohex-2-en-1-yl)carbamate (**12ac**)

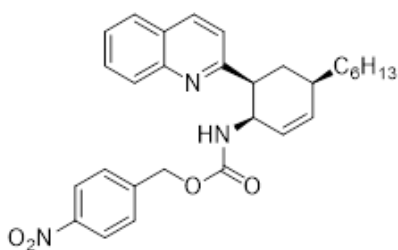

94% yield (45.6 mg); colorless oil;  $[\alpha]^{23.0}_D = -90.9$  ( $c = 1.0$ ,  $\text{CHCl}_3$ , 95% ee);  $R_f = 0.20$  (Hexane/EtOAc = 6/1);  $^1\text{H NMR}$  (600 MHz,  $\text{CDCl}_3$ , VT50)  $\delta$  8.07-8.00 (m, 1H), 7.99 (d,  $J = 8.4$  Hz, 1H), 7.85 (d,  $J = 8.4$  Hz, 2H), 7.74 (d,  $J = 7.2$  Hz, 1H), 7.66 (t,  $J = 7.2$  Hz, 1H), 7.50 (t,  $J = 7.2$  Hz, 1H), 7.33 (d,  $J = 7.2$  Hz, 1H), 6.99 (brs, 2H), 5.93-5.84 (m, 2H), 5.35 (brs, 1H), 4.88 (d,  $J = 12.6$  Hz, 1H), 4.68 (d,  $J = 12.6$  Hz, 1H), 4.61 (brs, 1H), 3.40-3.36 (m, 1H), 2.27 (brs, 1H), 2.18-2.09 (m, 1H), 1.78 (q,  $J = 12.6$  Hz, 1H), 1.49-1.38 (m, 4H), 1.35-1.25 (m, 6H), 0.89 (t,  $J = 7.2$  Hz, 3H);  $^{13}\text{C NMR}$  (150 MHz,  $\text{CDCl}_3$ )  $\delta$  162.2, 155.1, 147.8, 147.3, 144.2, 136.2, 136.0, 129.4, 129.2, 127.7, 127.5, 127.0, 126.2, 123.5, 123.4, 121.8, 64.6, 48.9, 46.3, 36.8, 36.0, 31.9, 29.6, 28.7, 26.8, 22.8, 14.2; IR (ATR) 3408, 3317, 3020, 2954, 2925, 2855, 1719, 1603, 1521, 1467, 1346, 1235, 1088, 887, 860, 830, 757  $\text{cm}^{-1}$ ; HRMS (FD+)  $m/z$ :  $[\text{M}+\text{H}]^+$  Calcd for  $\text{C}_{29}\text{H}_{33}\text{N}_3\text{O}_4$  487.24711, found: 487.24666.; HPLC analysis CHIRALCEL OD-3 (Hexane:*i*PrOH = 96/4, 1.0 mL/min, 40°C, 254 nm) 12.7 min (major), 21.1 min (minor).

**Configuration Assignment:** The absolute configuration was assigned as (*1R, 4R, 6S*) by analogy.

#### 4-Nitrobenzyl ((*1R,6S*)-3-methyl-6-(quinolin-2-yl)cyclohex-2-en-1-yl)carbamate (**12ad**)

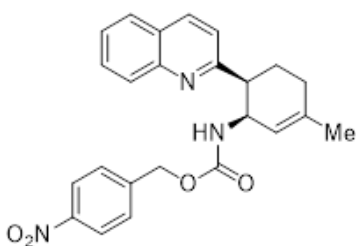

98% yield (40.9 mg); white solid;  $[\alpha]^{23.0}_D = -94.9$  ( $c = 1.0$ ,  $\text{CHCl}_3$ , 99% ee);  $R_f = 0.22$  (Hexane/EtOAc = 3/1); Mp: 59.2-63.1 °C;  $^1\text{H NMR}$  (600 MHz,  $\text{CDCl}_3$ , VT50)  $\delta$  8.03-7.97 (m, 2H), 7.88 (d,  $J = 8.4$  Hz, 2H), 7.74 (d,  $J = 7.2$  Hz, 1H), 7.65 (t,  $J = 7.2$  Hz, 1H), 7.50 (t,  $J = 7.2$  Hz, 1H), 7.33 (d,  $J = 7.2$  Hz, 1H), 7.05 (brs, 2H), 5.64 (s, 1H), 5.55 (brs, 1H), 4.92 (d,  $J = 12.0$  Hz, 1H), 4.74 (d,  $J = 12.0$  Hz, 1H), 4.64 (brs, 1H), 3.38-3.33 (m, 1H), 2.23-2.03 (m, 4H), 1.75 (s, 3H);  $^{13}\text{C NMR}$  (150 MHz,  $\text{CDCl}_3$ )  $\delta$  162.3, 155.2, 147.6, 147.3, 144.4, 138.3, 136.0, 129.4, 129.3, 127.7, 127.6, 127.0, 126.2, 123.5, 121.8, 64.6, 49.3, 45.7, 30.0, 23.6, 23.1, one carbon was not found probably due to overlapping; IR (ATR) 3410, 3333, 3044, 3013, 2934, 2909, 2832, 1720, 1603, 1520, 1429, 1347, 1227, 1106, 1061, 973, 831, 755  $\text{cm}^{-1}$ ; HRMS (FD+)  $m/z$ :  $[\text{M}+\text{H}]^+$  Calcd for  $\text{C}_{24}\text{H}_{23}\text{N}_3\text{O}_4$  417.16886, found: 417.16881.; HPLC analysis CHIRALCEL OD-3 (Hexane:*i*PrOH = 95/5, 1.0 mL/min, 40°C, 254 nm) 18.4 min (major), 38.0 min (minor).

**Configuration Assignment:** The absolute configuration was assigned as (*1R, 6S*) by analogy.

### 3-2. Screening of reaction conditions

**Table S1.** Screening of reaction conditions

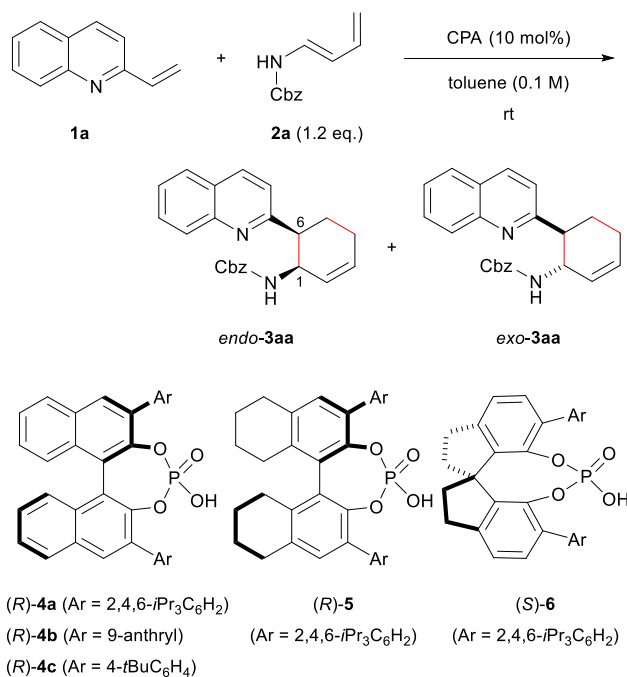

| Entry           | CPA                     | Time (h) | yield of <b>3aa</b><br>(%) <sup>b</sup> | <i>endo/exo</i> <sup>c</sup> | ee (%) <sup>c</sup>  |
|-----------------|-------------------------|----------|-----------------------------------------|------------------------------|----------------------|
| 1               | ( <i>R</i> )- <b>4a</b> | 12       | 95                                      | 81:19                        | 71 / 88              |
| 2               | ( <i>R</i> )- <b>4b</b> | 36       | 95                                      | 88:12                        | 5 / -12              |
| 3               | ( <i>R</i> )- <b>4c</b> | 36       | 67                                      | 87:13                        | 5 / -3               |
| 4               | ( <i>R</i> )- <b>5</b>  | 20       | 95                                      | 74:26                        | 71 / ND <sup>d</sup> |
| 5               | ( <i>S</i> )- <b>6</b>  | 74       | 62                                      | 99:1                         | 88 / ND <sup>d</sup> |
| 6 <sup>e</sup>  | ( <i>S</i> )- <b>6</b>  | 5 d      | 91                                      | 99:1                         | 92 / ND <sup>d</sup> |
| 7 <sup>f</sup>  | ( <i>S</i> )- <b>6</b>  | 5 d      | trace                                   | -                            | -                    |
| 8 <sup>g</sup>  | ( <i>R</i> )- <b>4a</b> | 12       | 90                                      | 76:24                        | 72 / 86              |
| 9 <sup>h</sup>  | ( <i>R</i> )- <b>4a</b> | 48       | 85                                      | 77:23                        | 73 / 83              |
| 10 <sup>i</sup> | ( <i>R</i> )- <b>4a</b> | 48       | 84                                      | 80:20                        | 72 / 82              |

<sup>a</sup> Unless otherwise noted, all reactions were carried out using 0.1 mmol of **1a**, 0.12 mmol of **2a**, and 0.010 mmol of CPA catalyst (10 mol %) in toluene (1 mL). <sup>b</sup> Isolated yield. <sup>c</sup> Diastereomeric and enantiomeric excess were determined by chiral stationary phase HPLC analysis. <sup>d</sup> ND: Not determined. <sup>e</sup> MS 5A (50 mg) was used as an additive. <sup>f</sup> conducted at 0°C. <sup>g</sup> C<sub>6</sub>H<sub>5</sub>Cl was used instead of toluene. <sup>h</sup> CH<sub>2</sub>Cl<sub>2</sub> was used instead of toluene. <sup>i</sup> C<sub>2</sub>H<sub>4</sub>Cl<sub>2</sub> was used instead of toluene.

## 4. Computational study by DFT calculations

### 4-1. Method

All calculations were performed with the Gaussian 16 package.<sup>4</sup> Molecular geometries and transition state structures were optimized and characterized using frequency calculations in the gas phase at the M06-2X/6-31G(d) level of theory,<sup>5</sup> unless otherwise noted. A manual conformational search has been performed on possible catalyst substrate orientations. Transition state structures were verified by the presence of a single imaginary vibrational frequency. NBO version 7.0.7 were employed to calculate the energy of the proposed hydrogen bonding interactions.<sup>6</sup> CYLview was used for generation of molecular structures.<sup>7</sup>

### 4-2. Investigation of other transition state structures

Table S2. Summary of TS search

| G=Trip-spinol                                                                          | m062x/6-31g(d) in gas-phase |              |                                      |
|----------------------------------------------------------------------------------------|-----------------------------|--------------|--------------------------------------|
| TS                                                                                     | Hartree                     | kcal/mol     | $\Delta\Delta G^\ddagger$ (kcal/mol) |
| R_exo                                                                                  | -3615.906268                | -2269017.342 | 8.92                                 |
| R_exo2                                                                                 | -3615.903415                | -2269015.552 | 10.71                                |
| S_exo                                                                                  | -3615.91317                 | -2269021.673 | 4.59                                 |
| S_exo2                                                                                 | -3615.909697                | -2269019.494 | 6.77                                 |
| R_endo [TS <sub>R</sub> (H)]                                                           | -3615.92049                 | -2269026.267 | <b>0.00</b>                          |
| S_endo                                                                                 | -3615.91178                 | -2269020.801 | 5.47                                 |
| S_endo2 [TS <sub>S</sub> (H)]                                                          | -3615.917654                | -2269024.487 | <b>1.78</b>                          |
| R_exo_t-t                                                                              | -3615.904635                | -2269016.318 | 9.95                                 |
| S_exo_t-t                                                                              | -3615.905438                | -2269016.821 | 9.45                                 |
| R_endo_t-c                                                                             | -3615.910534                | -2269020.019 | 6.25                                 |
| S_endo_t-c                                                                             | -3615.910506                | -2269020.002 | 6.27                                 |
| ↓ Rotational isomers of catalyst substituents [ <i>i</i> Pr groups (at para-position)] |                             |              |                                      |
| r-r_R_endo                                                                             | -3615.918406                | -2269024.959 | 1.31                                 |
| r-r_S_endo2                                                                            | -3615.914482                | -2269022.497 | 3.77                                 |
| r-l_R_endo                                                                             | -3615.916591                | -2269023.82  | 2.45                                 |
| r-l_S_endo2                                                                            | -3615.911926                | -2269020.893 | 5.37                                 |
| l-l_R_endo                                                                             | -3615.919252                | -2269025.49  | 0.78                                 |
| l-l_S_endo2                                                                            | -3615.915464                | -2269023.113 | 3.15                                 |

It is well known that the Diels-Alder reaction proceeds through a concerted fashion and hence the simultaneous formation of the two carbon-carbon bonds restricts the flexibility of the relative location between a dienophile and a diene. Therefore, structure searches were manually performed by primarily changing the conformation of the Cbz group, the orientation of the benzyl moiety and the geometry of the carbamate unit, i.e., *s-cis* and *s-trans*, and the initial structures were systematically generated by changing these parameters. In addition, several rotamers of the

catalyst were tested as the initial geometry in the optimizations. According to an exhaustive TS search, the predicted selectivity (95.4:4.6 er) at the m06-2x/6-31g(d) level of theory in gas phase was consistent with the observed selectivity (95.9:4.1 er), as shown in the next section 4-3.

### 4-3. Investigation of other calculation methods

**Table S3.** Summary of other calculation methods

| Conditions                                       | TS                       | Free Energy (Hartree) | $\Delta\Delta G^\ddagger$ (kcal mol <sup>-1</sup> ) | predicted e.r.  |
|--------------------------------------------------|--------------------------|-----------------------|-----------------------------------------------------|-----------------|
| B3LYP-D3/6-31g(d) in gas phase                   | <b>TS<sub>R</sub>(H)</b> | -3617.586897          | 0                                                   | 97.5:2.5        |
|                                                  | <b>TS<sub>S</sub>(H)</b> | -3617.583479          | 2.14                                                |                 |
| B3LYP-D3/6-31g(d)+cpcm(tol)//B3LYP-D3/6-31g(d)   | <b>TS<sub>R</sub>(H)</b> | -3617.598267          | 0                                                   | 97.3:2.7        |
|                                                  | <b>TS<sub>S</sub>(H)</b> | -3617.594915          | 2.10                                                |                 |
| B3LYP-D3/6-31g(d,p)+cpcm(tol)//B3LYP-D3/6-31g(d) | <b>TS<sub>R</sub>(H)</b> | -3618.442786          | 0                                                   | 97.5:2.5        |
|                                                  | <b>TS<sub>S</sub>(H)</b> | -3618.439397          | 2.13                                                |                 |
| M062-X/6-31g(d)+cpcm(tol)//B3LYP-D3/6-31g(d)     | <b>TS<sub>R</sub>(H)</b> | -3615.931635          | 0                                                   | 88.4:11.6       |
|                                                  | <b>TS<sub>S</sub>(H)</b> | -3615.929742          | 1.19                                                |                 |
| B3LYP/6-31g(d) in gas phase                      | <b>TS<sub>R</sub>(H)</b> | -3617.327413          | 0                                                   | 97.3:2.7        |
|                                                  | <b>TS<sub>S</sub>(H)</b> | -3617.324162          | 2.04                                                |                 |
| M06-2X/6-31g(d)+cpcm(tol)//B3LYP/6-31g(d)        | <b>TS<sub>R</sub>(H)</b> | -3615.924636          | 0                                                   | 99.8:0.2        |
|                                                  | <b>TS<sub>S</sub>(H)</b> | -3615.918823          | 3.65                                                |                 |
| <b>M06-2X/6-31g(d) in gas phase</b>              | <b>TS<sub>R</sub>(H)</b> | <b>-3615.92049</b>    | <b>0</b>                                            | <b>95.4:4.6</b> |
|                                                  | <b>TS<sub>S</sub>(H)</b> | <b>-3615.917654</b>   | <b>1.78</b>                                         |                 |
| M06-2X/6-31g(d)+cpcm(tol)//M06-2X/6-31g(d)       | <b>TS<sub>R</sub>(H)</b> | -3615.933642          | 0                                                   | 95.9:4.1        |
|                                                  | <b>TS<sub>S</sub>(H)</b> | -3615.930697          | 1.85                                                |                 |
| M06-2X/6-31g(d,p)//M06-2X/6-31g(d) in gas phase  | <b>TS<sub>R</sub>(H)</b> | -3616.104741          | 0                                                   | 99.3:0.7        |
|                                                  | <b>TS<sub>S</sub>(H)</b> | -3616.100081          | 2.92                                                |                 |

Calculations using the M06-2X/6-31g(d) level in the gas phase reproduced the experimental values well. In addition, calculations that took into account the solvent effect of toluene also reproduced the experimental values.

M06-2X/6-31g(d) level in the gas phase does not necessarily guarantee accurate relative energies in all TSs. However, the energy values at the M06-2X/6-31g(d) level in the gas phase are adopted in the following calculations to reduce the computational cost as much as possible.



#### 4-4. Energy profile

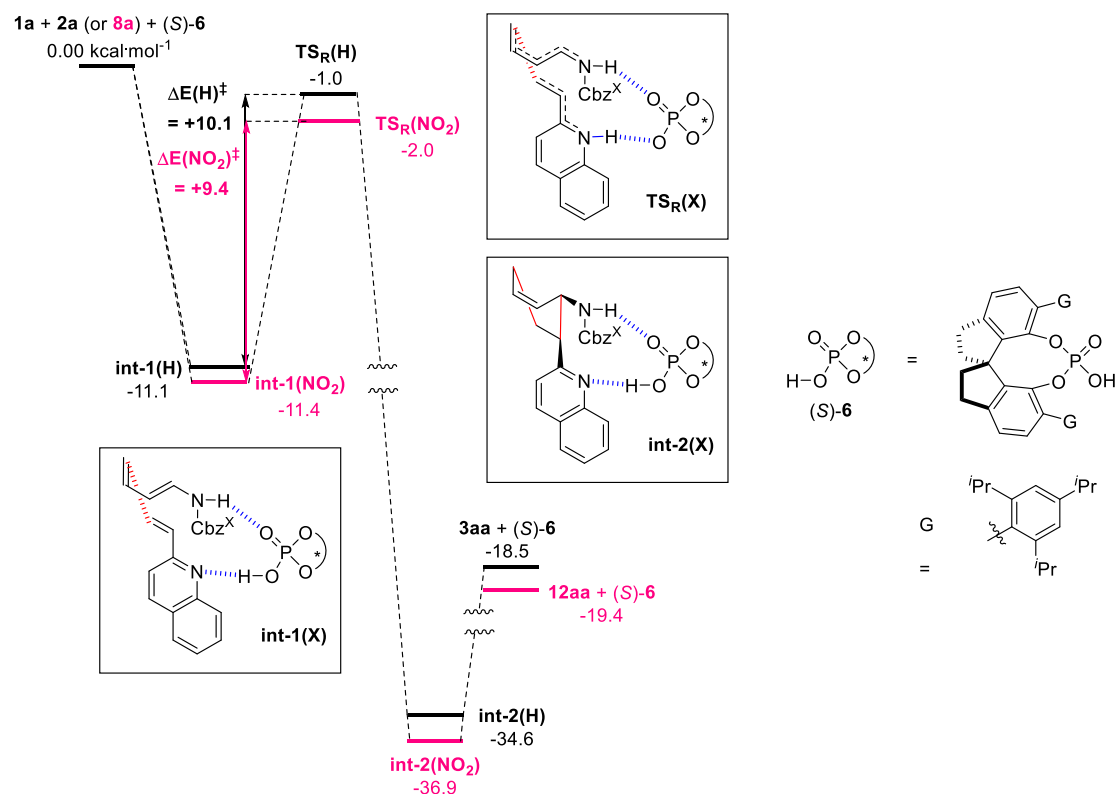

**Figure S1.** Energy profile of the Diels-Alder reaction

[Calculated at the m06-2x/6-31g(d) level of theory in gas phase.]

The activation free energies were calculated for the reactions using Cbz (**Figure S1, black-bars**) and Cbz-NO<sub>2</sub> groups (**Figure S1, pink-bars**). The results showed that the activation free energy was smaller when the Cbz-NO<sub>2</sub> group was used. This result indicates stabilization of TS in the rate-determining step and can be interpreted as a result of enhanced hydrogen bonding in the TS<sub>R</sub>(NO<sub>2</sub>).

#### 4-5. Distortion/Interaction analysis

Vinylquinoline (**1a**), dienylcarbamate (**2a**) and catalyst ((*S*)-**6**) were extracted from the transition state structures of R and S, respectively, and the free energies were calculated by single-point calculations.

Each was calculated as a neutral molecule at the m06-2x/6-31g(d) level of theory in gas phase. However, in the actual TS, the catalyst was present as a phosphate anion, and the dienophile was present as a vinylquinolinium cation. Therefore, the additional single-point calculations were performed at the m06-2x/6-31+g(d,p) level of theory in gas phase.

Comparing both calculation levels showed a marked difference in the catalyst distortion energy. However, it did not change the conclusion of distortion/interaction analysis that the difference in interaction energy was essential for enantioselectivity induction.

**Table S4.** Summary of distortion/interaction analysis

| Trip-spinol                                |                            | m06-2x/6-31g(d)//m06-2x/6-31g(d) in gas phase    |                 |                  |             |                |                                   |
|--------------------------------------------|----------------------------|--------------------------------------------------|-----------------|------------------|-------------|----------------|-----------------------------------|
| Origin of Enantioselectivity               |                            | distortion                                       |                 |                  |             |                |                                   |
|                                            | $\Delta \Delta G^\ddagger$ | phosphoric acid                                  | dienylcarbamate | vinylquinoline   |             | SUM            |                                   |
| <b>TS<sub>R</sub>(H)</b>                   | Hartree                    | -2466.948293                                     | -669.7857430    | -478.9673730     |             | -3615.70140900 |                                   |
|                                            | kcal/mol                   | -1548034.723                                     | -420297.2516    | -300556.8162     |             | -2268888.79    |                                   |
| <b>TS<sub>S</sub>(H)</b>                   | Hartree                    | -2466.957728                                     | -669.7871120    | -478.9672350     |             | -3615.71207500 |                                   |
|                                            | kcal/mol                   | -1548040.644                                     | -420298.1107    | -300556.73       |             | -2268895.48    |                                   |
| <b>TS<sub>S</sub>(H)-TS<sub>R</sub>(H)</b> | <b>1.78</b>                | kcal/mol                                         | <b>-5.92</b>    | <b>-0.86</b>     | <b>0.09</b> | <b>-6.69</b>   | <b>interaction</b><br><b>8.47</b> |
| Trip-spinol                                |                            | m06-2x/6-31+g(d,p)//m06-2x/6-31g(d) in gas phase |                 |                  |             |                |                                   |
| Origin of Enantioselectivity               |                            | distortion                                       |                 |                  |             |                |                                   |
|                                            | $\Delta \Delta G^\ddagger$ | phosphate                                        | dienylcarbamate | vinylquinolinium |             | SUM            |                                   |
| <b>TS<sub>R</sub>(H)</b>                   | Hartree                    | -2466.723484                                     | -669.8275130    | -479.3644710     |             | -3615.91546800 |                                   |
|                                            | kcal/mol                   | -1547893.653                                     | -420323.4627    | -300805.9992     |             | -2269023.12    |                                   |
| <b>TS<sub>S</sub>(H)</b>                   | Hartree                    | -2466.723958                                     | -669.8286210    | -479.3635520     |             | -3615.91613100 |                                   |
|                                            | kcal/mol                   | -1547893.951                                     | -420324.158     | -300805.42       |             | -2269023.53    |                                   |
| <b>TS<sub>S</sub>(H)-TS<sub>R</sub>(H)</b> | <b>2.92</b>                | kcal/mol                                         | <b>-0.30</b>    | <b>-0.70</b>     | <b>0.58</b> | <b>-0.42</b>   | <b>interaction</b><br><b>3.34</b> |

#### 4-6. NCI plot<sup>[8]</sup>

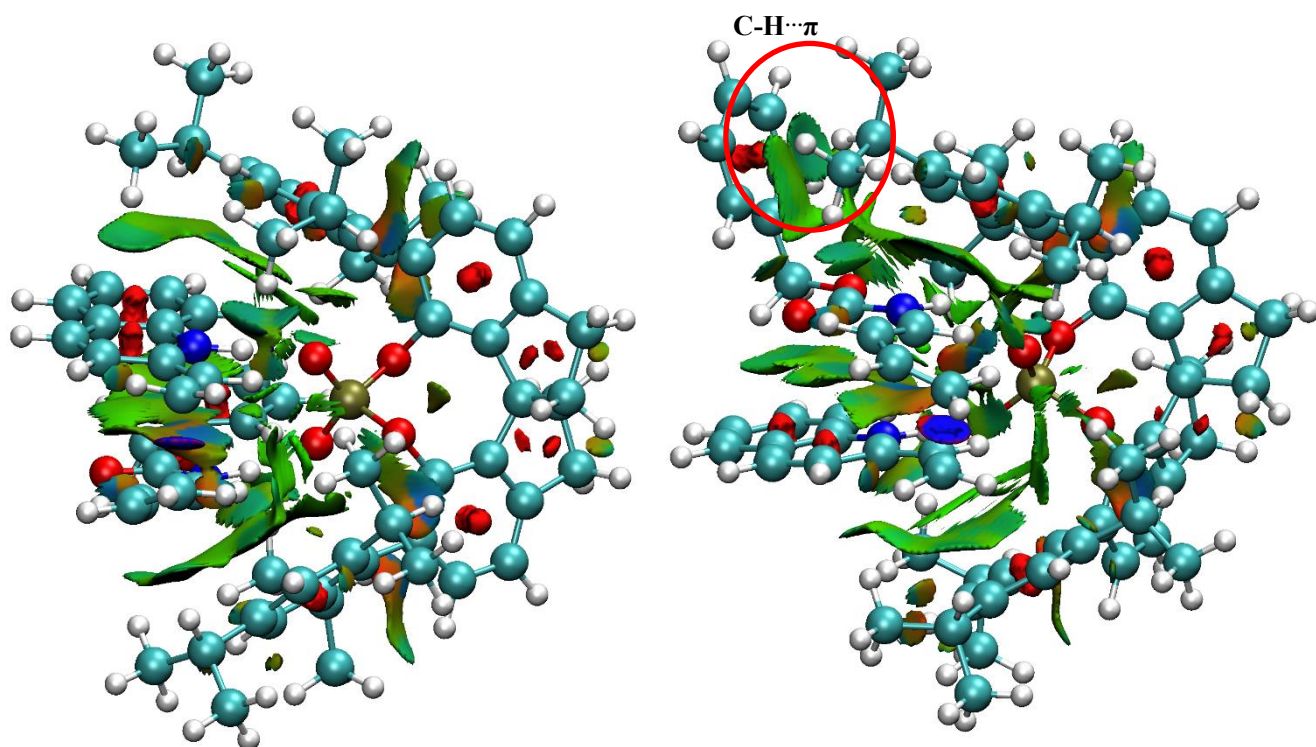

**Figure S2.** NCI analysis of  $TS_R(H)$  (left) and  $TS_S(H)$  (right) (The structure was fully optimized at the M06-2x/6-31G(d) level of theory in gas phase).

#### 4-7. Investigation of substituent effect

**Table S5.** Summary of substituent effect

| Trip-spinol                                     |              | M06-2X/6-31g(d) in gas phase |                           |               |
|-------------------------------------------------|--------------|------------------------------|---------------------------|---------------|
| TS                                              | Hartree      | kcal mol <sup>-1</sup>       | $\Delta\Delta G^\ddagger$ | Note          |
| TS <sub>R</sub> (H) [1a with 2a]                | -3615.920490 | -2269026.267                 | 0.00                      | Fig. 2 left   |
| TS <sub>S</sub> (H) [1a with 2a]                | -3615.917654 | -2269024.487                 | 1.78                      | Fig. 2 right  |
| TS <sub>R</sub> (Br) [1a with 7a]               | -6187.117688 | -3882478.220                 | 0.00                      | Fig. S3 left  |
| TS <sub>S</sub> (Br) [1a with 7a]               | -6187.114515 | -3882476.229                 | 1.99                      | Fig. S3 right |
| TS <sub>R</sub> (NO <sub>2</sub> ) [1a with 8a] | -3820.350334 | -2397308.038                 | 0.00                      | Fig. S4 left  |
| TS <sub>S</sub> (NO <sub>2</sub> ) [1a with 8a] | -3820.345497 | -2397305.003                 | 3.04                      | Fig. S4 right |

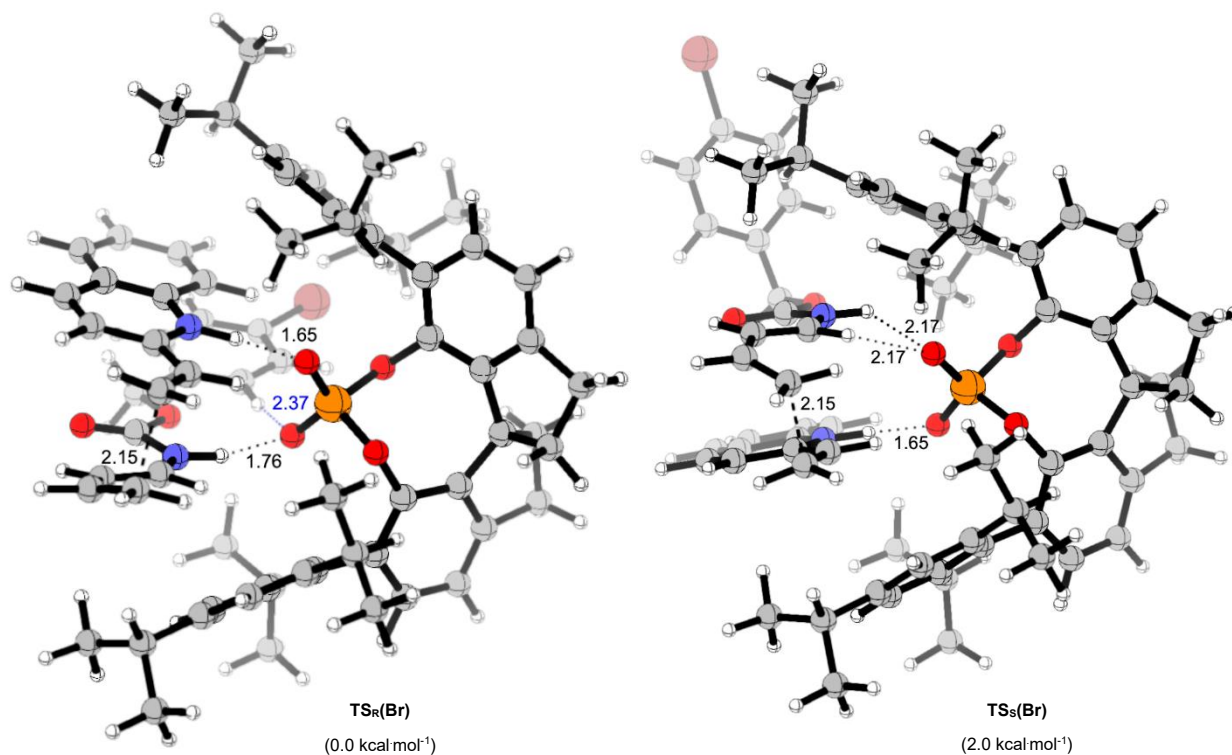

**Figure S3.** Optimized transition state structures for the Diels-Alder reaction of **1a** with **7a**.

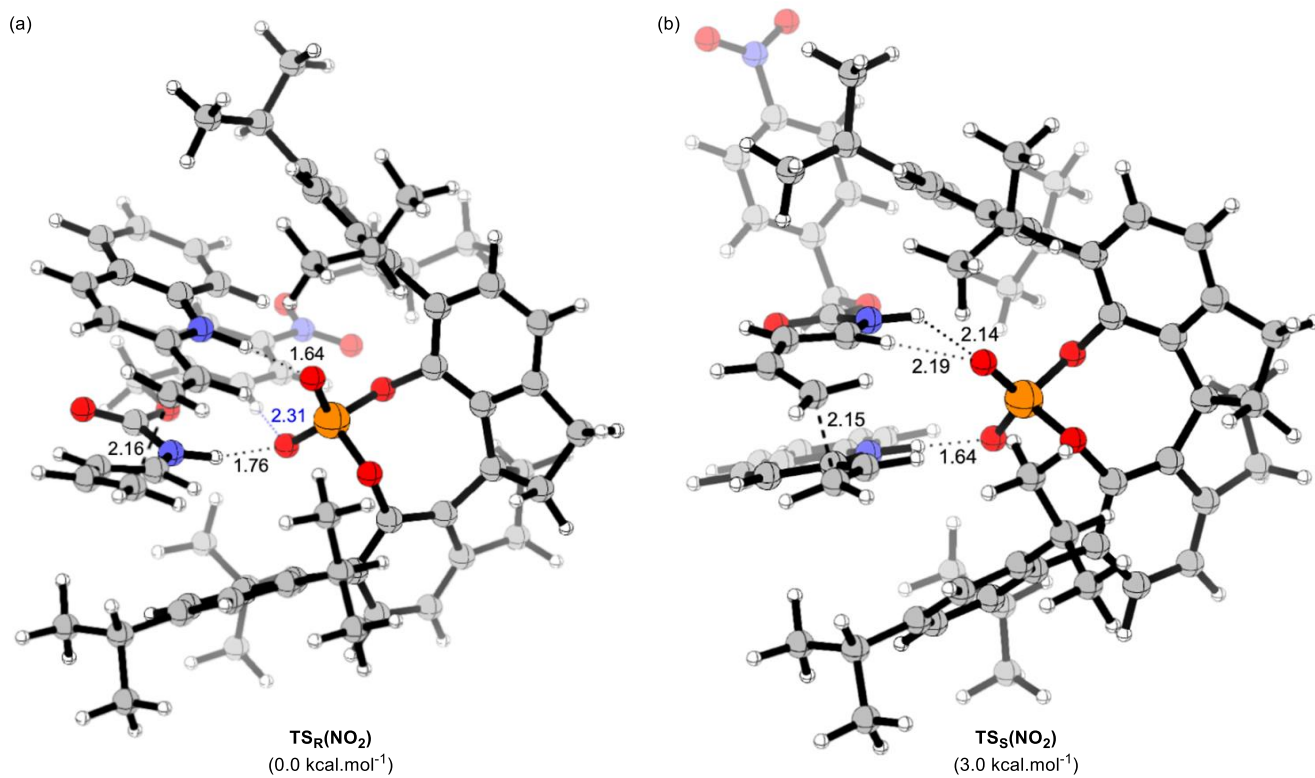

**Figure S4.** Optimized transition state structures for the Diels-Alder reaction of **1a** with **8a**.

## 4-8. Coordination

### 1a

M06-2X/6-31g(d) in gas phase

SCF Done: E(RM062X) = -479.121439 hartree

Sum of electronic and thermal Free Energies = -478.985687 hartree

The number of imaginary frequency = 0

| Center Number | Atomic Number | Atomic Type | Coordinates (Angstroms) |           |           |
|---------------|---------------|-------------|-------------------------|-----------|-----------|
|               |               |             | X                       | Y         | Z         |
| 1             | 6             | 0           | -3.276695               | 0.292449  | -0.000137 |
| 2             | 6             | 0           | -2.266453               | 1.220984  | 0.000059  |
| 3             | 6             | 0           | -0.912517               | 0.804693  | 0.000070  |
| 4             | 6             | 0           | -0.607427               | -0.582790 | -0.000123 |
| 5             | 6             | 0           | -1.672200               | -1.521204 | -0.000326 |
| 6             | 6             | 0           | -2.974620               | -1.091652 | -0.000333 |
| 7             | 1             | 0           | -0.008514               | 2.777670  | 0.000425  |
| 8             | 1             | 0           | -4.313024               | 0.615095  | -0.000145 |
| 9             | 1             | 0           | -2.488648               | 2.285038  | 0.000210  |
| 10            | 6             | 0           | 0.182568                | 1.707346  | 0.000267  |
| 11            | 1             | 0           | -1.412131               | -2.574570 | -0.000474 |
| 12            | 1             | 0           | -3.784850               | -1.814153 | -0.000489 |
| 13            | 6             | 0           | 1.664345                | -0.192089 | 0.000051  |
| 14            | 6             | 0           | 1.457400                | 1.220427  | 0.000262  |
| 15            | 1             | 0           | 2.306419                | 1.894590  | 0.000419  |
| 16            | 7             | 0           | 0.668889                | -1.055927 | -0.000129 |
| 17            | 6             | 0           | 3.015443                | -0.785991 | 0.000047  |
| 18            | 1             | 0           | 3.004577                | -1.872867 | -0.000095 |
| 19            | 6             | 0           | 4.172485                | -0.124171 | 0.000188  |
| 20            | 1             | 0           | 4.232471                | 0.960064  | 0.000325  |
| 21            | 1             | 0           | 5.116872                | -0.657443 | 0.000162  |

### 2a

M06-2X/6-31g(d) in gas phase

SCF Done: E(RM062X) = -670.002606 hartree

Sum of electronic and thermal Free Energies = -669.814822 hartree

The number of imaginary frequency = 0

| Center Number | Atomic Number | Atomic Type | Coordinates (Angstroms) |           |           |
|---------------|---------------|-------------|-------------------------|-----------|-----------|
|               |               |             | X                       | Y         | Z         |
| 1             | 6             | 0           | 6.247649                | -1.068550 | 0.517449  |
| 2             | 1             | 0           | 6.413947                | -0.728229 | 1.536110  |
| 3             | 1             | 0           | 7.064757                | -1.591124 | 0.033208  |
| 4             | 6             | 0           | 5.086847                | -0.850845 | -0.107043 |
| 5             | 1             | 0           | 4.953262                | -1.205518 | -1.128619 |
| 6             | 6             | 0           | 3.952491                | -0.157595 | 0.483261  |
| 7             | 1             | 0           | 4.060493                | 0.206547  | 1.504502  |
| 8             | 6             | 0           | 2.806846                | 0.038568  | -0.182829 |
| 9             | 1             | 0           | 2.655055                | -0.306338 | -1.200806 |
| 10            | 1             | 0           | 1.717459                | 1.054767  | 1.282136  |
| 11            | 7             | 0           | 1.698469                | 0.693372  | 0.338097  |
| 12            | 6             | 0           | 0.548330                | 0.873431  | -0.384325 |

|    |   |   |           |           |           |
|----|---|---|-----------|-----------|-----------|
| 13 | 8 | 0 | -0.348164 | 1.552443  | 0.356962  |
| 14 | 8 | 0 | 0.375486  | 0.490132  | -1.519336 |
| 15 | 6 | 0 | -1.635499 | 1.735732  | -0.260392 |
| 16 | 1 | 0 | -2.051730 | 2.608853  | 0.245417  |
| 17 | 1 | 0 | -1.489307 | 1.958410  | -1.319186 |
| 18 | 6 | 0 | -2.515438 | 0.527983  | -0.069644 |
| 19 | 6 | 0 | -2.596641 | -0.457632 | -1.055168 |
| 20 | 6 | 0 | -3.240728 | 0.375170  | 1.113465  |
| 21 | 6 | 0 | -3.398671 | -1.578643 | -0.859043 |
| 22 | 1 | 0 | -2.016018 | -0.344324 | -1.965603 |
| 23 | 6 | 0 | -4.039823 | -0.746060 | 1.312090  |
| 24 | 1 | 0 | -3.178156 | 1.142531  | 1.881510  |
| 25 | 6 | 0 | -4.120299 | -1.724198 | 0.323176  |
| 26 | 1 | 0 | -3.459380 | -2.340152 | -1.630379 |
| 27 | 1 | 0 | -4.602534 | -0.855258 | 2.234057  |
| 28 | 1 | 0 | -4.746096 | -2.598543 | 0.473992  |

### (S)-6

M06-2X/6-31g(d) in gas phase

SCF Done: E(RM062X) = -2468.005309 hartree

Sum of electronic and thermal Free Energies = -2467.118302 hartree

The number of imaginary frequency = 0

| Center Number | Atomic Number | Atomic Type | Coordinates (Angstroms) |           |           |
|---------------|---------------|-------------|-------------------------|-----------|-----------|
|               |               |             | X                       | Y         | Z         |
| 1             | 6             | 0           | -5.473353               | -0.586475 | 0.394417  |
| 2             | 1             | 0           | -5.687322               | -1.543254 | 0.893492  |
| 3             | 1             | 0           | -6.427644               | -0.057569 | 0.324066  |
| 4             | 6             | 0           | -4.888697               | -0.857732 | -0.965307 |
| 5             | 1             | 0           | -5.488696               | -0.696773 | -1.856354 |
| 6             | 6             | 0           | -3.634675               | -1.302945 | -1.048733 |
| 7             | 1             | 0           | -3.140246               | -1.513793 | -1.988462 |
| 8             | 6             | 0           | -2.890513               | -1.516433 | 0.242857  |
| 9             | 1             | 0           | -3.389564               | -2.337909 | 0.776575  |
| 10            | 1             | 0           | -1.067851               | -2.278672 | 0.926094  |
| 11            | 7             | 0           | -1.511672               | -1.957853 | 0.074187  |
| 12            | 6             | 0           | -0.632598               | -1.321748 | -0.763977 |
| 13            | 8             | 0           | 0.639596                | -1.589448 | -0.386047 |
| 14            | 8             | 0           | -0.914740               | -0.647886 | -1.729923 |
| 15            | 6             | 0           | 1.637527                | -0.973637 | -1.195941 |
| 16            | 1             | 0           | 1.644771                | -1.450166 | -2.183342 |
| 17            | 1             | 0           | 1.382088                | 0.082702  | -1.342219 |
| 18            | 6             | 0           | 2.979969                | -1.093550 | -0.523265 |
| 19            | 6             | 0           | 3.150775                | -1.726250 | 0.705454  |
| 20            | 6             | 0           | 4.082320                | -0.500716 | -1.143705 |
| 21            | 6             | 0           | 4.406594                | -1.756006 | 1.310680  |
| 22            | 1             | 0           | 2.295303                | -2.182205 | 1.191259  |
| 23            | 6             | 0           | 5.334838                | -0.531799 | -0.542061 |
| 24            | 1             | 0           | 3.950988                | 0.003721  | -2.098756 |
| 25            | 6             | 0           | 5.500455                | -1.158513 | 0.692674  |
| 26            | 1             | 0           | 4.527643                | -2.248492 | 2.270968  |
| 27            | 1             | 0           | 6.182499                | -0.064122 | -1.033887 |

|    |   |   |           |           |           |    |   |   |           |           |           |
|----|---|---|-----------|-----------|-----------|----|---|---|-----------|-----------|-----------|
| 28 | 1 | 0 | 6.476890  | -1.181780 | 1.166544  | 24 | 1 | 0 | 0.762027  | -5.829496 | 3.992801  |
| 29 | 6 | 0 | 2.377177  | 2.843925  | -0.236073 | 25 | 6 | 0 | 2.222087  | -3.098385 | 5.386870  |
| 30 | 6 | 0 | 1.128177  | 3.062372  | -0.763626 | 26 | 1 | 0 | 1.925482  | -1.073360 | 4.718290  |
| 31 | 6 | 0 | 0.003882  | 2.361353  | -0.258807 | 27 | 1 | 0 | 2.318302  | -5.208509 | 5.812663  |
| 32 | 6 | 0 | 0.183396  | 1.440903  | 0.807187  | 28 | 1 | 0 | 2.903353  | -2.822404 | 6.185908  |
| 33 | 6 | 0 | 1.479441  | 1.254177  | 1.351574  | 29 | 1 | 0 | 0.803199  | -0.688616 | -1.754755 |
| 34 | 6 | 0 | 2.553743  | 1.931485  | 0.833144  | 30 | 6 | 0 | 2.575562  | -4.222467 | 0.876513  |
| 35 | 1 | 0 | -1.481866 | 3.189568  | -1.604014 | 31 | 6 | 0 | 1.882967  | -4.787411 | -0.168265 |
| 36 | 1 | 0 | 3.237721  | 3.368591  | -0.639484 | 32 | 6 | 0 | 1.278415  | -3.960170 | -1.142515 |
| 37 | 1 | 0 | 0.985300  | 3.760247  | -1.584747 | 33 | 6 | 0 | 1.406001  | -2.558582 | -1.013006 |
| 38 | 6 | 0 | -1.304677 | 2.492994  | -0.788432 | 34 | 6 | 0 | 2.121481  | -1.983186 | 0.052191  |
| 39 | 1 | 0 | 1.590386  | 0.531775  | 2.153656  | 35 | 6 | 0 | 2.694734  | -2.817711 | 0.981484  |
| 40 | 1 | 0 | 3.550400  | 1.747345  | 1.223781  | 36 | 1 | 0 | 0.374307  | -5.526380 | -2.331305 |
| 41 | 6 | 0 | -2.024494 | 0.783362  | 0.743281  | 37 | 1 | 0 | 3.026063  | -4.850825 | 1.638227  |
| 42 | 6 | 0 | -2.312318 | 1.711698  | -0.298756 | 38 | 1 | 0 | 1.783297  | -5.865265 | -0.259927 |
| 43 | 1 | 0 | -3.305950 | 1.749126  | -0.730812 | 39 | 6 | 0 | 0.514630  | -4.453469 | -2.234089 |
| 44 | 7 | 0 | -0.834338 | 0.675796  | 1.293847  | 40 | 1 | 0 | 2.213570  | -0.902176 | 0.117773  |
| 45 | 6 | 0 | -3.024814 | -0.261698 | 1.186082  | 41 | 1 | 0 | 3.238626  | -2.388388 | 1.817160  |
| 46 | 1 | 0 | -2.683380 | -0.589067 | 2.173170  | 42 | 6 | 0 | 0.080556  | -2.200001 | -2.961186 |
| 47 | 6 | 0 | -4.491496 | 0.224338  | 1.268363  | 43 | 6 | 0 | -0.061043 | -3.600330 | -3.132514 |
| 48 | 1 | 0 | -4.545217 | 1.273049  | 0.962654  | 44 | 1 | 0 | -0.679764 | -3.971380 | -3.939547 |
| 49 | 1 | 0 | -4.826976 | 0.196110  | 2.309161  | 45 | 7 | 0 | 0.797121  | -1.751149 | -1.936569 |

-----

**Int-1(H)**

M06-2X/6-31g(d) in gas phase

SCF Done: E(RM062X) = -3617.205628 hartree

Sum of electronic and thermal Free Energies = -3615.936512 hartree

The number of imaginary frequency = 0

-----

| Center Number | Atomic Number | Atomic Type | Coordinates (Angstroms) |   |   |
|---------------|---------------|-------------|-------------------------|---|---|
|               |               |             | X                       | Y | Z |

|    |   |   |           |           |           |
|----|---|---|-----------|-----------|-----------|
| 1  | 6 | 0 | -4.065561 | -1.516879 | -4.018933 |
| 2  | 1 | 0 | -3.544184 | -0.622235 | -3.692667 |
| 3  | 1 | 0 | -4.711490 | -1.420558 | -4.885858 |
| 4  | 6 | 0 | -3.947530 | -2.684246 | -3.368031 |
| 5  | 1 | 0 | -4.498710 | -3.539321 | -3.758764 |
| 6  | 6 | 0 | -3.154177 | -2.965131 | -2.175262 |
| 7  | 1 | 0 | -3.052965 | -4.001283 | -1.876606 |
| 8  | 6 | 0 | -2.563272 | -2.010667 | -1.426793 |
| 9  | 1 | 0 | -2.684148 | -0.955052 | -1.664401 |
| 10 | 1 | 0 | -1.330886 | -1.351567 | 0.110255  |
| 11 | 7 | 0 | -1.754991 | -2.190010 | -0.314931 |
| 12 | 6 | 0 | -1.522110 | -3.375634 | 0.321066  |
| 13 | 8 | 0 | -0.611013 | -3.177690 | 1.300215  |
| 14 | 8 | 0 | -2.021756 | -4.454093 | 0.073996  |
| 15 | 6 | 0 | -0.504615 | -4.226837 | 2.253245  |
| 16 | 1 | 0 | -1.498271 | -4.425333 | 2.674534  |
| 17 | 1 | 0 | -0.168248 | -5.143757 | 1.756868  |
| 18 | 6 | 0 | 0.462645  | -3.804322 | 3.329426  |
| 19 | 6 | 0 | 0.800643  | -2.465036 | 3.533454  |
| 20 | 6 | 0 | 1.017044  | -4.784152 | 4.155265  |
| 21 | 6 | 0 | 1.673684  | -2.118262 | 4.563404  |
| 22 | 1 | 0 | 0.402532  | -1.700627 | 2.871297  |
| 23 | 6 | 0 | 1.892755  | -4.436087 | 5.179150  |

|    |   |   |           |           |           |
|----|---|---|-----------|-----------|-----------|
| 46 | 6 | 0 | -0.543579 | -1.186089 | -3.813083 |
| 47 | 1 | 0 | -0.483399 | -0.166313 | -3.437332 |
| 48 | 6 | 0 | -1.148068 | -1.453121 | -4.972980 |
| 49 | 1 | 0 | -1.226560 | -2.454064 | -5.385170 |
| 50 | 1 | 0 | -1.588447 | -0.654260 | -5.559211 |
| 51 | 6 | 0 | -0.621763 | 5.659651  | 2.999229  |
| 52 | 6 | 0 | -1.541258 | 4.582400  | 2.471094  |
| 53 | 6 | 0 | -1.016585 | 4.020537  | 1.303224  |
| 54 | 6 | 0 | 0.669523  | 5.401317  | 2.203064  |
| 55 | 1 | 0 | -1.024137 | 6.659919  | 2.794153  |
| 56 | 1 | 0 | -0.475740 | 5.588035  | 4.081214  |
| 57 | 1 | 0 | 1.263892  | 4.627502  | 2.702221  |
| 58 | 1 | 0 | 1.298070  | 6.288766  | 2.081986  |
| 59 | 6 | 0 | 0.174466  | 4.836356  | 0.841093  |
| 60 | 6 | 0 | -0.260465 | 6.011747  | -0.079075 |
| 61 | 6 | 0 | 1.327343  | 4.274358  | 0.034954  |
| 62 | 6 | 0 | 1.060658  | 6.544929  | -0.663604 |
| 63 | 1 | 0 | -0.840552 | 6.768297  | 0.457949  |
| 64 | 1 | 0 | -0.886521 | 5.608126  | -0.882866 |
| 65 | 6 | 0 | 1.913746  | 5.297426  | -0.717162 |
| 66 | 1 | 0 | 0.934880  | 7.003915  | -1.648828 |
| 67 | 1 | 0 | 1.509352  | 7.303787  | -0.010110 |
| 68 | 6 | 0 | -2.744882 | 4.132201  | 2.992511  |
| 69 | 6 | 0 | -3.403586 | 3.091910  | 2.345471  |
| 70 | 6 | 0 | -2.858626 | 2.444116  | 1.229475  |
| 71 | 6 | 0 | -1.641222 | 2.922396  | 0.723907  |
| 72 | 1 | 0 | -3.167732 | 4.579386  | 3.887693  |
| 73 | 1 | 0 | -4.358307 | 2.737442  | 2.723184  |
| 74 | 6 | 0 | 1.876085  | 2.999406  | 0.009951  |
| 75 | 6 | 0 | 3.087625  | 2.757164  | -0.654458 |
| 76 | 6 | 0 | 3.700796  | 3.826962  | -1.315848 |
| 77 | 6 | 0 | 3.109787  | 5.085654  | -1.386160 |
| 78 | 1 | 0 | 4.651192  | 3.647466  | -1.810142 |
| 79 | 1 | 0 | 3.580575  | 5.883167  | -1.953987 |
| 80 | 8 | 0 | -1.066521 | 2.327112  | -0.386963 |

|     |    |   |           |           |           |
|-----|----|---|-----------|-----------|-----------|
| 81  | 8  | 0 | -0.420994 | 0.077282  | 0.759677  |
| 82  | 8  | 0 | 0.555546  | 0.822513  | -1.536046 |
| 83  | 15 | 0 | 0.058453  | 1.162282  | -0.148757 |
| 84  | 8  | 0 | 1.231999  | 1.967728  | 0.670137  |
| 85  | 6  | 0 | 3.739524  | 1.413395  | -0.659519 |
| 86  | 6  | 0 | 3.956629  | 0.733836  | -1.878347 |
| 87  | 6  | 0 | 4.212715  | 0.851400  | 0.545758  |
| 88  | 6  | 0 | 4.622257  | -0.494470 | -1.860706 |
| 89  | 6  | 0 | 4.900129  | -0.361934 | 0.502287  |
| 90  | 6  | 0 | 5.100633  | -1.062917 | -0.683515 |
| 91  | 1  | 0 | 4.775333  | -1.016185 | -2.802548 |
| 92  | 1  | 0 | 5.273019  | -0.792590 | 1.431335  |
| 93  | 6  | 0 | -3.607857 | 1.296422  | 0.634304  |
| 94  | 6  | 0 | -3.891227 | 0.164518  | 1.426491  |
| 95  | 6  | 0 | -4.148343 | 1.390787  | -0.667365 |
| 96  | 6  | 0 | -4.720833 | -0.834146 | 0.910848  |
| 97  | 6  | 0 | -4.980015 | 0.370002  | -1.130781 |
| 98  | 6  | 0 | -5.288991 | -0.749081 | -0.355689 |
| 99  | 1  | 0 | -4.929580 | -1.703527 | 1.528570  |
| 100 | 1  | 0 | -5.412867 | 0.446226  | -2.128337 |
| 101 | 6  | 0 | -3.357799 | -0.022474 | 2.842054  |
| 102 | 1  | 0 | -2.682590 | 0.805196  | 3.071988  |
| 103 | 6  | 0 | -4.499637 | -0.014427 | 3.866924  |
| 104 | 1  | 0 | -5.171361 | -0.865435 | 3.707725  |
| 105 | 1  | 0 | -4.100050 | -0.089304 | 4.883768  |
| 106 | 1  | 0 | -5.102366 | 0.896809  | 3.801228  |
| 107 | 6  | 0 | -2.534691 | -1.307094 | 2.966197  |
| 108 | 1  | 0 | -2.171360 | -1.430279 | 3.993176  |
| 109 | 1  | 0 | -3.126751 | -2.195575 | 2.711512  |
| 110 | 1  | 0 | -1.672819 | -1.256644 | 2.301239  |
| 111 | 6  | 0 | -3.905332 | 2.592293  | -1.569836 |
| 112 | 1  | 0 | -3.273847 | 3.306793  | -1.037463 |
| 113 | 6  | 0 | -5.219185 | 3.309855  | -1.902832 |
| 114 | 1  | 0 | -5.895790 | 2.659586  | -2.467862 |
| 115 | 1  | 0 | -5.736465 | 3.621699  | -0.990422 |
| 116 | 1  | 0 | -5.025094 | 4.199949  | -2.510850 |
| 117 | 6  | 0 | -3.162355 | 2.188492  | -2.848012 |
| 118 | 1  | 0 | -2.909831 | 3.074305  | -3.440847 |
| 119 | 1  | 0 | -2.230849 | 1.665759  | -2.604973 |
| 120 | 1  | 0 | -3.788815 | 1.540038  | -3.471937 |
| 121 | 6  | 0 | -6.260154 | -1.789031 | -0.882016 |
| 122 | 1  | 0 | -6.057079 | -1.900076 | -1.954094 |
| 123 | 6  | 0 | -7.700065 | -1.278446 | -0.724252 |
| 124 | 1  | 0 | -8.415691 | -1.997874 | -1.137014 |
| 125 | 1  | 0 | -7.934838 | -1.131716 | 0.336026  |
| 126 | 1  | 0 | -7.840156 | -0.320380 | -1.234265 |
| 127 | 6  | 0 | -6.108488 | -3.161625 | -0.224782 |
| 128 | 1  | 0 | -6.457662 | -3.143126 | 0.814224  |
| 129 | 1  | 0 | -6.715996 | -3.900790 | -0.756910 |
| 130 | 1  | 0 | -5.067202 | -3.499546 | -0.231148 |
| 131 | 6  | 0 | 3.542548  | 1.302302  | -3.230527 |
| 132 | 1  | 0 | 2.933680  | 2.192854  | -3.058416 |
| 133 | 6  | 0 | 2.679655  | 0.332275  | -4.041388 |
| 134 | 1  | 0 | 2.433884  | 0.771514  | -5.014247 |
| 135 | 1  | 0 | 3.186442  | -0.621555 | -4.226251 |
| 136 | 1  | 0 | 1.747048  | 0.142288  | -3.511867 |
| 137 | 6  | 0 | 4.783554  | 1.704632  | -4.040164 |

|     |   |   |          |           |           |
|-----|---|---|----------|-----------|-----------|
| 138 | 1 | 0 | 4.490202 | 2.183496  | -4.980301 |
| 139 | 1 | 0 | 5.425527 | 2.397072  | -3.487443 |
| 140 | 1 | 0 | 5.386756 | 0.822746  | -4.284918 |
| 141 | 6 | 0 | 4.014770 | 1.508107  | 1.903996  |
| 142 | 1 | 0 | 3.461764 | 2.439900  | 1.767068  |
| 143 | 6 | 0 | 3.184769 | 0.608796  | 2.828649  |
| 144 | 1 | 0 | 2.976603 | 1.124723  | 3.773123  |
| 145 | 1 | 0 | 2.227645 | 0.344555  | 2.365646  |
| 146 | 1 | 0 | 3.727598 | -0.313662 | 3.070742  |
| 147 | 6 | 0 | 5.360279 | 1.866666  | 2.546479  |
| 148 | 1 | 0 | 5.960609 | 0.970839  | 2.739661  |
| 149 | 1 | 0 | 5.941513 | 2.527712  | 1.896474  |
| 150 | 1 | 0 | 5.202489 | 2.375536  | 3.503196  |
| 151 | 6 | 0 | 5.826024 | -2.394934 | -0.667591 |
| 152 | 1 | 0 | 5.718021 | -2.805050 | 0.346360  |
| 153 | 6 | 0 | 7.322265 | -2.192825 | -0.940151 |
| 154 | 1 | 0 | 7.861643 | -3.144833 | -0.891315 |
| 155 | 1 | 0 | 7.469128 | -1.767228 | -1.939172 |
| 156 | 1 | 0 | 7.765421 | -1.504746 | -0.214204 |
| 157 | 6 | 0 | 5.231007 | -3.411914 | -1.644735 |
| 158 | 1 | 0 | 5.684542 | -4.396213 | -1.489898 |
| 159 | 1 | 0 | 4.148394 | -3.505700 | -1.510503 |
| 160 | 1 | 0 | 5.423285 | -3.124018 | -2.683977 |

-----

**R\_endo [TS<sub>R</sub>(H)]**

B3LYP/6-31g(d) in gas phase

SCF Done: E(RB3LYP) = -3618.575510 hartree

Sum of electronic and thermal Free Energies = -3617.327413 hartree

The number of imaginary frequency = 1

Imaginary frequency = -356.54

-----

| Center Number | Atomic Number | Atomic Type | Coordinates (Angstroms) |           |           |
|---------------|---------------|-------------|-------------------------|-----------|-----------|
|               |               |             | X                       | Y         | Z         |
| 1             | 6             | 0           | -3.340122               | -2.419102 | -3.935136 |
| 2             | 1             | 0           | -3.414042               | -1.435040 | -3.484604 |
| 3             | 1             | 0           | -3.870860               | -2.523244 | -4.878301 |
| 4             | 6             | 0           | -3.190472               | -3.545869 | -3.134824 |
| 5             | 1             | 0           | -3.414158               | -4.510305 | -3.590317 |
| 6             | 6             | 0           | -2.601022               | -3.603491 | -1.852082 |
| 7             | 1             | 0           | -2.405253               | -4.576269 | -1.420814 |
| 8             | 6             | 0           | -2.176221               | -2.484509 | -1.160636 |
| 9             | 1             | 0           | -2.428559               | -1.490581 | -1.511454 |
| 10            | 1             | 0           | -1.193302               | -1.516289 | 0.379127  |
| 11            | 7             | 0           | -1.462462               | -2.449007 | -0.000032 |
| 12            | 6             | 0           | -0.989058               | -3.552483 | 0.699835  |
| 13            | 8             | 0           | -0.311327               | -3.117901 | 1.777740  |
| 14            | 8             | 0           | -1.147742               | -4.720918 | 0.402603  |
| 15            | 6             | 0           | 0.253294                | -4.135431 | 2.620346  |
| 16            | 1             | 0           | -0.531078               | -4.850296 | 2.891632  |
| 17            | 1             | 0           | 1.008906                | -4.683157 | 2.044501  |
| 18            | 6             | 0           | 0.857342                | -3.486056 | 3.843380  |
| 19            | 6             | 0           | 0.993234                | -2.099210 | 3.966044  |
| 20            | 6             | 0           | 1.309873                | -4.313911 | 4.879537  |
| 21            | 6             | 0           | 1.573847                | -1.554572 | 5.115163  |



|    |   |   |           |           |           |     |    |   |           |           |           |
|----|---|---|-----------|-----------|-----------|-----|----|---|-----------|-----------|-----------|
| 22 | 1 | 0 | 0.639239  | -1.448684 | 3.172841  | 79  | 1  | 0 | 2.935877  | 6.133028  | -2.110679 |
| 23 | 6 | 0 | 1.893553  | -3.767583 | 6.021133  | 80  | 8  | 0 | -1.411069 | 2.073202  | -0.464318 |
| 24 | 1 | 0 | 1.201357  | -5.393831 | 4.794137  | 81  | 8  | 0 | -0.558903 | 0.045730  | 0.951007  |
| 25 | 6 | 0 | 2.026767  | -2.382146 | 6.142374  | 82  | 8  | 0 | 0.323788  | 0.541489  | -1.453881 |
| 26 | 1 | 0 | 1.668485  | -0.475720 | 5.201803  | 83  | 15 | 0 | -0.163521 | 1.036939  | -0.110954 |
| 27 | 1 | 0 | 2.238070  | -4.422244 | 6.817546  | 84  | 8  | 0 | 0.961123  | 2.034608  | 0.589847  |
| 28 | 1 | 0 | 2.476825  | -1.952878 | 7.033680  | 85  | 6  | 0 | 3.667191  | 1.800717  | -0.623737 |
| 29 | 1 | 0 | 0.861465  | -1.096000 | -1.600062 | 86  | 6  | 0 | 4.078272  | 1.154879  | -1.818439 |
| 30 | 6 | 0 | 3.646438  | -4.415437 | 0.417547  | 87  | 6  | 0 | 4.216968  | 1.382888  | 0.614836  |
| 31 | 6 | 0 | 3.038949  | -4.964227 | -0.698276 | 88  | 6  | 0 | 5.020414  | 0.120495  | -1.745570 |
| 32 | 6 | 0 | 2.162581  | -4.190820 | -1.488301 | 89  | 6  | 0 | 5.148356  | 0.338763  | 0.626219  |
| 33 | 6 | 0 | 1.926384  | -2.837645 | -1.126976 | 90  | 6  | 0 | 5.578324  | -0.301712 | -0.538774 |
| 34 | 6 | 0 | 2.556488  | -2.279960 | 0.001250  | 91  | 1  | 0 | 5.330949  | -0.358891 | -2.669304 |
| 35 | 6 | 0 | 3.400162  | -3.070468 | 0.762526  | 92  | 1  | 0 | 5.578942  | 0.030731  | 1.577609  |
| 36 | 1 | 0 | 1.658211  | -5.724541 | -2.941912 | 93  | 6  | 0 | -4.031690 | 1.025826  | 0.434419  |
| 37 | 1 | 0 | 4.314227  | -5.016695 | 1.027178  | 94  | 6  | 0 | -4.348089 | -0.068770 | 1.280363  |
| 38 | 1 | 0 | 3.219237  | -5.999534 | -0.975987 | 95  | 6  | 0 | -4.476429 | 1.012053  | -0.913241 |
| 39 | 6 | 0 | 1.478602  | -4.696159 | -2.638657 | 96  | 6  | 0 | -5.090450 | -1.139198 | 0.762151  |
| 40 | 1 | 0 | 2.372263  | -1.244194 | 0.264848  | 97  | 6  | 0 | -5.206896 | -0.087844 | -1.375788 |
| 41 | 1 | 0 | 3.875009  | -2.641712 | 1.639249  | 98  | 6  | 0 | -5.538820 | -1.173071 | -0.558044 |
| 42 | 6 | 0 | 0.353786  | -2.560847 | -2.949325 | 99  | 1  | 0 | -5.328334 | -1.966606 | 1.423518  |
| 43 | 6 | 0 | 0.608227  | -3.917971 | -3.340668 | 100 | 1  | 0 | -5.564147 | -0.085751 | -2.404300 |
| 44 | 1 | 0 | 0.090671  | -4.314259 | -4.205148 | 101 | 6  | 0 | -3.952163 | -0.132763 | 2.759508  |
| 45 | 7 | 0 | 1.049644  | -2.088290 | -1.879869 | 102 | 1  | 0 | -3.355067 | 0.751080  | 2.991883  |
| 46 | 6 | 0 | -0.537687 | -1.673725 | -3.611808 | 103 | 6  | 0 | -5.196333 | -0.106875 | 3.671387  |
| 47 | 1 | 0 | -0.563545 | -0.657781 | -3.227520 | 104 | 1  | 0 | -5.817001 | -0.999746 | 3.528751  |
| 48 | 6 | 0 | -1.376844 | -2.016373 | -4.666761 | 105 | 1  | 0 | -4.895269 | -0.077660 | 4.725614  |
| 49 | 1 | 0 | -1.243698 | -2.949055 | -5.205411 | 106 | 1  | 0 | -5.829065 | 0.766270  | 3.475772  |
| 50 | 1 | 0 | -1.775234 | -1.209996 | -5.274899 | 107 | 6  | 0 | -3.069979 | -1.349926 | 3.088797  |
| 51 | 6 | 0 | -1.370144 | 5.665707  | 2.703589  | 108 | 1  | 0 | -2.837558 | -1.364420 | 4.160782  |
| 52 | 6 | 0 | -2.198699 | 4.510160  | 2.185739  | 109 | 1  | 0 | -3.567074 | -2.297577 | 2.847137  |
| 53 | 6 | 0 | -1.574430 | 3.901422  | 1.085582  | 110 | 1  | 0 | -2.126135 | -1.298757 | 2.544105  |
| 54 | 6 | 0 | -0.032598 | 5.474521  | 1.957966  | 111 | 6  | 0 | -4.268129 | 2.190238  | -1.866550 |
| 55 | 1 | 0 | -1.831105 | 6.633497  | 2.460503  | 112 | 1  | 0 | -3.697831 | 2.958147  | -1.340408 |
| 56 | 1 | 0 | -1.254928 | 5.639574  | 3.793613  | 113 | 6  | 0 | -5.614461 | 2.829794  | -2.262321 |
| 57 | 1 | 0 | 0.612744  | 4.789034  | 2.519203  | 114 | 1  | 0 | -6.244148 | 2.133434  | -2.828952 |
| 58 | 1 | 0 | 0.520716  | 6.406839  | 1.808263  | 115 | 1  | 0 | -6.178336 | 3.143558  | -1.376794 |
| 59 | 6 | 0 | -0.433590 | 4.790258  | 0.607982  | 116 | 1  | 0 | -5.448017 | 3.713751  | -2.890227 |
| 60 | 6 | 0 | -0.968762 | 5.879866  | -0.381838 | 117 | 6  | 0 | -3.451596 | 1.801181  | -3.112708 |
| 61 | 6 | 0 | 0.801044  | 4.318159  | -0.151712 | 118 | 1  | 0 | -3.291698 | 2.677727  | -3.752647 |
| 62 | 6 | 0 | 0.302594  | 6.523947  | -0.969429 | 119 | 1  | 0 | -2.470257 | 1.411353  | -2.825760 |
| 63 | 1 | 0 | -1.637368 | 6.596557  | 0.104869  | 120 | 1  | 0 | -3.972860 | 1.047374  | -3.717129 |
| 64 | 1 | 0 | -1.535220 | 5.381342  | -1.176878 | 121 | 6  | 0 | -6.422818 | -2.288161 | -1.108768 |
| 65 | 6 | 0 | 1.291769  | 5.380335  | -0.928605 | 122 | 1  | 0 | -6.136035 | -2.431875 | -2.160376 |
| 66 | 1 | 0 | 0.153036  | 6.910027  | -1.984669 | 123 | 6  | 0 | -7.904335 | -1.854989 | -1.091333 |
| 67 | 1 | 0 | 0.642618  | 7.372067  | -0.358345 | 124 | 1  | 0 | -8.541563 | -2.625000 | -1.543780 |
| 68 | 6 | 0 | -3.421812 | 4.045226  | 2.651450  | 125 | 1  | 0 | -8.246925 | -1.692917 | -0.062119 |
| 69 | 6 | 0 | -4.000104 | 2.945000  | 2.022761  | 126 | 1  | 0 | -8.054250 | -0.920395 | -1.642565 |
| 70 | 6 | 0 | -3.349265 | 2.236397  | 0.997615  | 127 | 6  | 0 | -6.252455 | -3.640024 | -0.400399 |
| 71 | 6 | 0 | -2.101046 | 2.723827  | 0.551669  | 128 | 1  | 0 | -6.617267 | -3.605160 | 0.633104  |
| 72 | 1 | 0 | -3.926660 | 4.531040  | 3.482938  | 129 | 1  | 0 | -6.830902 | -4.412601 | -0.920319 |
| 73 | 1 | 0 | -4.974511 | 2.594241  | 2.348467  | 130 | 1  | 0 | -5.204067 | -3.954510 | -0.380913 |
| 74 | 6 | 0 | 1.504451  | 3.111082  | -0.102447 | 131 | 6  | 0 | 3.567206  | 1.553315  | -3.206757 |
| 75 | 6 | 0 | 2.784224  | 3.011529  | -0.692806 | 132 | 1  | 0 | 2.828160  | 2.347576  | -3.083293 |
| 76 | 6 | 0 | 3.284961  | 4.137332  | -1.369888 | 133 | 6  | 0 | 2.845980  | 0.396515  | -3.920912 |
| 77 | 6 | 0 | 2.539892  | 5.302035  | -1.531959 | 134 | 1  | 0 | 2.510760  | 0.718070  | -4.914929 |
| 78 | 1 | 0 | 4.280062  | 4.073928  | -1.799464 | 135 | 1  | 0 | 3.497167  | -0.475485 | -4.057228 |

|     |   |   |          |           |           |    |   |   |           |           |           |
|-----|---|---|----------|-----------|-----------|----|---|---|-----------|-----------|-----------|
| 136 | 1 | 0 | 1.967155 | 0.094256  | -3.349044 | 20 | 6 | 0 | 1.807321  | -3.313889 | 4.850304  |
| 137 | 6 | 0 | 4.704010 | 2.108034  | -4.089185 | 21 | 6 | 0 | 1.784493  | -0.538085 | 4.670838  |
| 138 | 1 | 0 | 4.306808 | 2.451145  | -5.052349 | 22 | 1 | 0 | 0.461094  | -0.798890 | 2.990166  |
| 139 | 1 | 0 | 5.213476 | 2.953434  | -3.613497 | 23 | 6 | 0 | 2.567996  | -2.554934 | 5.739145  |
| 140 | 1 | 0 | 5.461739 | 1.342872  | -4.296705 | 24 | 1 | 0 | 1.817977  | -4.400246 | 4.920634  |
| 141 | 6 | 0 | 3.894159 | 2.075048  | 1.939535  | 25 | 6 | 0 | 2.555749  | -1.160403 | 5.653501  |
| 142 | 1 | 0 | 3.182446 | 2.878742  | 1.739668  | 26 | 1 | 0 | 1.773145  | 0.545138  | 4.591464  |
| 143 | 6 | 0 | 3.225086 | 1.119957  | 2.944611  | 27 | 1 | 0 | 3.168519  | -3.051292 | 6.497136  |
| 144 | 1 | 0 | 2.984040 | 1.654640  | 3.872194  | 28 | 1 | 0 | 3.145897  | -0.565045 | 6.345113  |
| 145 | 1 | 0 | 2.294552 | 0.716366  | 2.535017  | 29 | 1 | 0 | 0.723167  | -1.161500 | -1.390568 |
| 146 | 1 | 0 | 3.882641 | 0.282732  | 3.209317  | 30 | 6 | 0 | 3.309800  | -4.202325 | 1.204042  |
| 147 | 6 | 0 | 5.148862 | 2.734027  | 2.547296  | 31 | 6 | 0 | 2.664304  | -4.915895 | 0.208496  |
| 148 | 1 | 0 | 5.909374 | 1.990997  | 2.815320  | 32 | 6 | 0 | 1.832996  | -4.252628 | -0.718826 |
| 149 | 1 | 0 | 5.605393 | 3.439977  | 1.844417  | 33 | 6 | 0 | 1.679954  | -2.845359 | -0.611805 |
| 150 | 1 | 0 | 4.886906 | 3.284091  | 3.459482  | 34 | 6 | 0 | 2.340313  | -2.124142 | 0.398076  |
| 151 | 6 | 0 | 6.672188 | -1.361632 | -0.460408 | 35 | 6 | 0 | 3.143647  | -2.805350 | 1.293972  |
| 152 | 1 | 0 | 6.568958 | -1.855260 | 0.516775  | 36 | 1 | 0 | 1.230904  | -5.989876 | -1.874483 |
| 153 | 6 | 0 | 8.065479 | -0.698366 | -0.491422 | 37 | 1 | 0 | 3.943024  | -4.715984 | 1.921034  |
| 154 | 1 | 0 | 8.858376 | -1.447372 | -0.372755 | 38 | 1 | 0 | 2.784611  | -5.993049 | 0.128640  |
| 155 | 1 | 0 | 8.226340 | -0.182266 | -1.445717 | 39 | 6 | 0 | 1.123190  | -4.913273 | -1.770964 |
| 156 | 1 | 0 | 8.171327 | 0.041842  | 0.308939  | 40 | 1 | 0 | 2.216091  | -1.049409 | 0.463899  |
| 157 | 6 | 0 | 6.572779 | -2.452795 | -1.537562 | 41 | 1 | 0 | 3.644097  | -2.250191 | 2.079791  |
| 158 | 1 | 0 | 7.320184 | -3.233552 | -1.353351 | 42 | 6 | 0 | 0.140388  | -2.805432 | -2.480707 |
| 159 | 1 | 0 | 5.584139 | -2.922724 | -1.545176 | 43 | 6 | 0 | 0.313864  | -4.222233 | -2.622740 |
| 160 | 1 | 0 | 6.766755 | -2.051661 | -2.539409 | 44 | 1 | 0 | -0.233557 | -4.736257 | -3.402586 |

**R\_endo [TSr(H)]**

B3LYP-D/6-31g(d) in gas phase

SCF Done: E(RB3LYP) = -3618.847860 hartree

Sum of electronic and thermal Free Energies = -3617.586897 hartree

The number of imaginary frequency = 1

Imaginary frequency = -327.37

| Center Number | Atomic Number | Atomic Type | Coordinates (Angstroms) |           |           |
|---------------|---------------|-------------|-------------------------|-----------|-----------|
|               |               |             | X                       | Y         | Z         |
| 1             | 6             | 0           | -3.502506               | -2.722189 | -3.682142 |
| 2             | 1             | 0           | -3.567382               | -1.693959 | -3.343135 |
| 3             | 1             | 0           | -4.004655               | -2.919904 | -4.625782 |
| 4             | 6             | 0           | -3.384919               | -3.754449 | -2.758188 |
| 5             | 1             | 0           | -3.612554               | -4.762679 | -3.102521 |
| 6             | 6             | 0           | -2.810909               | -3.658287 | -1.475349 |
| 7             | 1             | 0           | -2.625376               | -4.568502 | -0.921322 |
| 8             | 6             | 0           | -2.373070               | -2.462209 | -0.936595 |
| 9             | 1             | 0           | -2.626690               | -1.517579 | -1.399710 |
| 10            | 1             | 0           | -1.362100               | -1.326888 | 0.463490  |
| 11            | 7             | 0           | -1.648559               | -2.291855 | 0.199896  |
| 12            | 6             | 0           | -1.142674               | -3.296041 | 1.012318  |
| 13            | 8             | 0           | -0.360100               | -2.715788 | 1.934677  |
| 14            | 8             | 0           | -1.347654               | -4.491098 | 0.917930  |
| 15            | 6             | 0           | 0.214013                | -3.558734 | 2.938723  |
| 16            | 1             | 0           | -0.593594               | -4.072129 | 3.475090  |
| 17            | 1             | 0           | 0.831031                | -4.323354 | 2.455489  |
| 18            | 6             | 0           | 1.031144                | -2.691072 | 3.865366  |
| 19            | 6             | 0           | 1.029546                | -1.294266 | 3.770581  |

|    |   |   |           |           |           |
|----|---|---|-----------|-----------|-----------|
| 45 | 7 | 0 | 0.848558  | -2.198165 | -1.495010 |
| 46 | 6 | 0 | -0.701738 | -1.992153 | -3.289899 |
| 47 | 1 | 0 | -0.722886 | -0.936654 | -3.037578 |
| 48 | 6 | 0 | -1.482897 | -2.437345 | -4.349820 |
| 49 | 1 | 0 | -1.340612 | -3.428212 | -4.769039 |
| 50 | 1 | 0 | -1.825089 | -1.697099 | -5.066529 |
| 51 | 6 | 0 | -1.134922 | 5.878394  | 2.357837  |
| 52 | 6 | 0 | -2.008921 | 4.726956  | 1.909734  |
| 53 | 6 | 0 | -1.413842 | 4.046168  | 0.838336  |
| 54 | 6 | 0 | 0.195590  | 5.586463  | 1.628093  |
| 55 | 1 | 0 | -1.555361 | 6.845464  | 2.048621  |
| 56 | 1 | 0 | -1.023076 | 5.917115  | 3.447430  |
| 57 | 1 | 0 | 0.806954  | 4.898855  | 2.223893  |
| 58 | 1 | 0 | 0.792928  | 6.481712  | 1.430162  |
| 59 | 6 | 0 | -0.237013 | 4.852567  | 0.316654  |
| 60 | 6 | 0 | -0.722052 | 5.902966  | -0.737589 |
| 61 | 6 | 0 | 0.960715  | 4.267005  | -0.418356 |
| 62 | 6 | 0 | 0.577904  | 6.437845  | -1.370446 |
| 63 | 1 | 0 | -1.349860 | 6.681679  | -0.294230 |
| 64 | 1 | 0 | -1.318616 | 5.380939  | -1.494828 |
| 65 | 6 | 0 | 1.490845  | 5.235515  | -1.285318 |
| 66 | 1 | 0 | 0.440754  | 6.786917  | -2.400234 |
| 67 | 1 | 0 | 0.979889  | 7.286081  | -0.798689 |
| 68 | 6 | 0 | -3.235702 | 4.311144  | 2.413592  |
| 69 | 6 | 0 | -3.837428 | 3.178412  | 1.866208  |
| 70 | 6 | 0 | -3.207805 | 2.400883  | 0.878964  |
| 71 | 6 | 0 | -1.976938 | 2.861277  | 0.373793  |
| 72 | 1 | 0 | -3.719455 | 4.852160  | 3.222981  |
| 73 | 1 | 0 | -4.802617 | 2.850129  | 2.238105  |
| 74 | 6 | 0 | 1.584870  | 3.023778  | -0.309742 |
| 75 | 6 | 0 | 2.802342  | 2.774432  | -0.973216 |
| 76 | 6 | 0 | 3.352026  | 3.806326  | -1.751931 |



|    |   |   |           |           |           |     |    |   |           |           |           |
|----|---|---|-----------|-----------|-----------|-----|----|---|-----------|-----------|-----------|
| 18 | 6 | 0 | 1.410169  | -2.729031 | 3.689835  | 75  | 6  | 0 | 2.586234  | 2.900566  | -1.004904 |
| 19 | 6 | 0 | 1.300853  | -1.338687 | 3.732406  | 76  | 6  | 0 | 3.058350  | 3.938402  | -1.818793 |
| 20 | 6 | 0 | 2.321114  | -3.377162 | 4.526840  | 77  | 6  | 0 | 2.350103  | 5.122067  | -1.993349 |
| 21 | 6 | 0 | 2.088952  | -0.613524 | 4.625956  | 78  | 1  | 0 | 3.999669  | 3.788480  | -2.339288 |
| 22 | 1 | 0 | 0.618963  | -0.824165 | 3.059731  | 79  | 1  | 0 | 2.716060  | 5.889781  | -2.669194 |
| 23 | 6 | 0 | 3.114108  | -2.647958 | 5.406176  | 80  | 8  | 0 | -1.422580 | 2.088888  | -0.560432 |
| 24 | 1 | 0 | 2.411703  | -4.460931 | 4.484846  | 81  | 8  | 0 | -0.664479 | 0.206287  | 1.045259  |
| 25 | 6 | 0 | 2.997317  | -1.259882 | 5.459421  | 82  | 8  | 0 | 0.288087  | 0.462679  | -1.367789 |
| 26 | 1 | 0 | 1.995007  | 0.467780  | 4.658986  | 83  | 15 | 0 | -0.220449 | 1.074084  | -0.090259 |
| 27 | 1 | 0 | 3.821654  | -3.161710 | 6.050075  | 84  | 8  | 0 | 0.888122  | 2.115272  | 0.527471  |
| 28 | 1 | 0 | 3.612484  | -0.686295 | 6.146015  | 85  | 6  | 0 | 3.388600  | 1.639862  | -0.932997 |
| 29 | 1 | 0 | 0.727610  | -1.130864 | -1.314429 | 86  | 6  | 0 | 3.533689  | 0.835927  | -2.080002 |
| 30 | 6 | 0 | 3.632945  | -4.086195 | 1.010813  | 87  | 6  | 0 | 4.101291  | 1.322707  | 0.245471  |
| 31 | 6 | 0 | 2.953741  | -4.811541 | 0.053469  | 88  | 6  | 0 | 4.381455  | -0.275860 | -2.024692 |
| 32 | 6 | 0 | 2.016215  | -4.176281 | -0.786507 | 89  | 6  | 0 | 4.947696  | 0.215957  | 0.241259  |
| 33 | 6 | 0 | 1.798696  | -2.790766 | -0.631345 | 90  | 6  | 0 | 5.099244  | -0.600398 | -0.880372 |
| 34 | 6 | 0 | 2.489835  | -2.051293 | 0.344513  | 91  | 1  | 0 | 4.484883  | -0.895274 | -2.911768 |
| 35 | 6 | 0 | 3.394458  | -2.703770 | 1.154965  | 92  | 1  | 0 | 5.508030  | -0.034381 | 1.139671  |
| 36 | 1 | 0 | 1.412823  | -5.920215 | -1.930461 | 93  | 6  | 0 | -3.871125 | 0.924811  | 0.518348  |
| 37 | 1 | 0 | 4.349588  | -4.577081 | 1.661507  | 94  | 6  | 0 | -4.076649 | -0.113167 | 1.453226  |
| 38 | 1 | 0 | 3.126596  | -5.877467 | -0.065795 | 95  | 6  | 0 | -4.332464 | 0.766796  | -0.808654 |
| 39 | 6 | 0 | 1.263898  | -4.851900 | -1.799431 | 96  | 6  | 0 | -4.766983 | -1.262592 | 1.054042  |
| 40 | 1 | 0 | 2.305903  | -0.982904 | 0.441613  | 97  | 6  | 0 | -5.026919 | -0.394660 | -1.149558 |
| 41 | 1 | 0 | 3.922142  | -2.139669 | 1.919374  | 98  | 6  | 0 | -5.268779 | -1.420004 | -0.233738 |
| 42 | 6 | 0 | 0.157980  | -2.778625 | -2.395999 | 99  | 1  | 0 | -4.916952 | -2.053150 | 1.784412  |
| 43 | 6 | 0 | 0.371477  | -4.185595 | -2.576730 | 100 | 1  | 0 | -5.410051 | -0.503739 | -2.164506 |
| 44 | 1 | 0 | -0.208694 | -4.705316 | -3.329281 | 101 | 6  | 0 | -3.616007 | -0.034834 | 2.905438  |
| 45 | 7 | 0 | 0.881175  | -2.165669 | -1.440728 | 102 | 1  | 0 | -3.050733 | 0.889888  | 3.039346  |
| 46 | 6 | 0 | -0.738343 | -1.975064 | -3.162504 | 103 | 6  | 0 | -4.822191 | -0.009948 | 3.854813  |
| 47 | 1 | 0 | -0.775218 | -0.922569 | -2.891877 | 104 | 1  | 0 | -5.373991 | -0.955706 | 3.807968  |
| 48 | 6 | 0 | -1.499435 | -2.428860 | -4.220288 | 105 | 1  | 0 | -4.490103 | 0.131712  | 4.888543  |
| 49 | 1 | 0 | -1.334960 | -3.411255 | -4.650519 | 106 | 1  | 0 | -5.524310 | 0.792103  | 3.606513  |
| 50 | 1 | 0 | -1.897783 | -1.693950 | -4.912604 | 107 | 6  | 0 | -2.669250 | -1.179661 | 3.279730  |
| 51 | 6 | 0 | -1.408857 | 5.819994  | 2.397651  | 108 | 1  | 0 | -2.426333 | -1.128406 | 4.347202  |
| 52 | 6 | 0 | -2.216399 | 4.611961  | 1.978151  | 109 | 1  | 0 | -3.116676 | -2.162652 | 3.087351  |
| 53 | 6 | 0 | -1.606586 | 3.972635  | 0.895627  | 110 | 1  | 0 | -1.738895 | -1.097571 | 2.717996  |
| 54 | 6 | 0 | -0.081292 | 5.603498  | 1.645679  | 111 | 6  | 0 | -4.142401 | 1.826169  | -1.885078 |
| 55 | 1 | 0 | -1.897031 | 6.752217  | 2.086403  | 112 | 1  | 0 | -3.638913 | 2.688120  | -1.442597 |
| 56 | 1 | 0 | -1.277596 | 5.873913  | 3.482578  | 113 | 6  | 0 | -5.488352 | 2.318829  | -2.430889 |
| 57 | 1 | 0 | 0.577502  | 4.954330  | 2.233162  | 114 | 1  | 0 | -6.036462 | 1.514633  | -2.933770 |
| 58 | 1 | 0 | 0.457496  | 6.531305  | 1.430368  | 115 | 1  | 0 | -6.120746 | 2.704334  | -1.625530 |
| 59 | 6 | 0 | -0.493826 | 4.844955  | 0.353192  | 116 | 1  | 0 | -5.331798 | 3.120752  | -3.159989 |
| 60 | 6 | 0 | -1.052327 | 5.860251  | -0.685111 | 117 | 6  | 0 | -3.248553 | 1.302130  | -3.016040 |
| 61 | 6 | 0 | 0.709901  | 4.315197  | -0.404428 | 118 | 1  | 0 | -3.056692 | 2.091597  | -3.750594 |
| 62 | 6 | 0 | 0.200728  | 6.455465  | -1.347580 | 119 | 1  | 0 | -2.284310 | 0.964834  | -2.621887 |
| 63 | 1 | 0 | -1.706664 | 6.607182  | -0.225680 | 120 | 1  | 0 | -3.736685 | 0.472677  | -3.544437 |
| 64 | 1 | 0 | -1.636387 | 5.306412  | -1.428907 | 121 | 6  | 0 | -6.094400 | -2.621539 | -0.658541 |
| 65 | 6 | 0 | 1.166481  | 5.294703  | -1.292331 | 122 | 1  | 0 | -5.765677 | -2.894932 | -1.670546 |
| 66 | 1 | 0 | 0.020756  | 6.798765  | -2.370753 | 123 | 6  | 0 | -7.578025 | -2.231754 | -0.732640 |
| 67 | 1 | 0 | 0.582066  | 7.314788  | -0.781265 | 124 | 1  | 0 | -8.184713 | -3.073780 | -1.082787 |
| 68 | 6 | 0 | -3.392914 | 4.112173  | 2.517375  | 125 | 1  | 0 | -7.939504 | -1.937292 | 0.258811  |
| 69 | 6 | 0 | -3.928908 | 2.943817  | 1.983525  | 126 | 1  | 0 | -7.735252 | -1.387354 | -1.410517 |
| 70 | 6 | 0 | -3.282083 | 2.221685  | 0.972425  | 127 | 6  | 0 | -5.912968 | -3.844625 | 0.239020  |
| 71 | 6 | 0 | -2.102027 | 2.758758  | 0.439381  | 128 | 1  | 0 | -6.340503 | -3.672191 | 1.233270  |
| 72 | 1 | 0 | -3.887854 | 4.616215  | 3.342642  | 129 | 1  | 0 | -6.429431 | -4.707310 | -0.193342 |
| 73 | 1 | 0 | -4.857832 | 2.545473  | 2.381300  | 130 | 1  | 0 | -4.855586 | -4.100283 | 0.359169  |
| 74 | 6 | 0 | 1.389769  | 3.104673  | -0.300850 | 131 | 6  | 0 | 2.858979  | 1.158965  | -3.407557 |

|     |   |   |          |           |           |    |   |   |           |           |           |
|-----|---|---|----------|-----------|-----------|----|---|---|-----------|-----------|-----------|
| 132 | 1 | 0 | 2.119517 | 1.945126  | -3.233305 | 17 | 1 | 0 | 1.310804  | -4.087821 | 2.063189  |
| 133 | 6 | 0 | 2.106278 | -0.036698 | -3.995515 | 18 | 6 | 0 | 1.580675  | -2.595517 | 3.597559  |
| 134 | 1 | 0 | 1.625604 | 0.250736  | -4.937122 | 19 | 6 | 0 | 1.449077  | -1.206470 | 3.616827  |
| 135 | 1 | 0 | 2.771474 | -0.880984 | -4.209489 | 20 | 6 | 0 | 2.567598  | -3.207979 | 4.373152  |
| 136 | 1 | 0 | 1.331143 | -0.361459 | -3.304404 | 21 | 6 | 0 | 2.302978  | -0.446054 | 4.415711  |
| 137 | 6 | 0 | 3.893499 | 1.666033  | -4.423103 | 22 | 1 | 0 | 0.696837  | -0.720893 | 2.999010  |
| 138 | 1 | 0 | 3.402835 | 1.949846  | -5.360278 | 23 | 6 | 0 | 3.422863  | -2.444046 | 5.160339  |
| 139 | 1 | 0 | 4.447406 | 2.532382  | -4.051301 | 24 | 1 | 0 | 2.672724  | -4.291214 | 4.350579  |
| 140 | 1 | 0 | 4.623637 | 0.880307  | -4.649411 | 25 | 6 | 0 | 3.292812  | -1.055914 | 5.181993  |
| 141 | 6 | 0 | 4.021520 | 2.215899  | 1.475942  | 26 | 1 | 0 | 2.194263  | 0.634595  | 4.427707  |
| 142 | 1 | 0 | 2.994996 | 2.585266  | 1.555874  | 27 | 1 | 0 | 4.189252  | -2.930347 | 5.756721  |
| 143 | 6 | 0 | 4.336471 | 1.479095  | 2.779197  | 28 | 1 | 0 | 3.958487  | -0.454385 | 5.793872  |
| 144 | 1 | 0 | 4.082316 | 2.112659  | 3.635432  | 29 | 1 | 0 | 0.762485  | -1.193938 | -0.963086 |
| 145 | 1 | 0 | 3.765157 | 0.549212  | 2.862308  | 30 | 6 | 0 | 4.083434  | -3.952058 | 1.018835  |
| 146 | 1 | 0 | 5.402078 | 1.237139  | 2.861811  | 31 | 6 | 0 | 3.397566  | -4.717206 | 0.105432  |
| 147 | 6 | 0 | 4.957844 | 3.422178  | 1.314680  | 32 | 6 | 0 | 2.345755  | -4.143814 | -0.650523 |
| 148 | 1 | 0 | 5.994999 | 3.081575  | 1.216607  | 33 | 6 | 0 | 2.050434  | -2.775423 | -0.452964 |
| 149 | 1 | 0 | 4.705324 | 4.009654  | 0.427462  | 34 | 6 | 0 | 2.780965  | -1.983453 | 0.453634  |
| 150 | 1 | 0 | 4.894870 | 4.077714  | 2.190067  | 35 | 6 | 0 | 3.773089  | -2.581596 | 1.192140  |
| 151 | 6 | 0 | 6.048714 | -1.782474 | -0.823811 | 36 | 1 | 0 | 1.758035  | -5.915822 | -1.742147 |
| 152 | 1 | 0 | 6.025529 | -2.162361 | 0.207269  | 37 | 1 | 0 | 4.871248  | -4.397531 | 1.617810  |
| 153 | 6 | 0 | 7.482737 | -1.325416 | -1.124339 | 38 | 1 | 0 | 3.633558  | -5.767900 | -0.035357 |
| 154 | 1 | 0 | 8.184942 | -2.162597 | -1.047160 | 39 | 6 | 0 | 1.537278  | -4.866863 | -1.564465 |
| 155 | 1 | 0 | 7.542574 | -0.920013 | -2.140479 | 40 | 1 | 0 | 2.533357  | -0.929860 | 0.567554  |
| 156 | 1 | 0 | 7.800885 | -0.540964 | -0.431176 | 41 | 1 | 0 | 4.314678  | -1.993779 | 1.928460  |
| 157 | 6 | 0 | 5.643812 | -2.929481 | -1.750372 | 42 | 6 | 0 | 0.150285  | -2.926972 | -1.880752 |
| 158 | 1 | 0 | 6.246507 | -3.818693 | -1.539334 | 43 | 6 | 0 | 0.454727  | -4.279071 | -2.162027 |
| 159 | 1 | 0 | 4.587957 | -3.189497 | -1.622702 | 44 | 1 | 0 | -0.220369 | -4.850579 | -2.785996 |
| 160 | 1 | 0 | 5.806543 | -2.665737 | -2.801361 | 45 | 7 | 0 | 0.981872  | -2.232570 | -1.111443 |

-----

**Int-2(H)**

M06-2X/6-31g(d) in gas phase

SCF Done: E(RM062X) = -3617.253292 hartree

Sum of electronic and thermal Free Energies = -3615.973905 hartree

The number of imaginary frequency = 0

-----

| Center Number | Atomic Number | Atomic Type | Coordinates (Angstroms) |           |           |
|---------------|---------------|-------------|-------------------------|-----------|-----------|
|               |               |             | X                       | Y         | Z         |
| 1             | 6             | 0           | -3.231904               | -3.064649 | -3.455909 |
| 2             | 1             | 0           | -3.846796               | -2.180488 | -3.228271 |
| 3             | 1             | 0           | -3.579588               | -3.453998 | -4.416302 |
| 4             | 6             | 0           | -3.385926               | -4.073361 | -2.350699 |
| 5             | 1             | 0           | -3.924708               | -5.000725 | -2.525583 |
| 6             | 6             | 0           | -2.844285               | -3.797003 | -1.163057 |
| 7             | 1             | 0           | -2.885886               | -4.474188 | -0.318312 |
| 8             | 6             | 0           | -2.140679               | -2.477247 | -1.004866 |
| 9             | 1             | 0           | -2.879681               | -1.675951 | -1.122218 |
| 10            | 1             | 0           | -1.464998               | -1.303751 | 0.647289  |
| 11            | 7             | 0           | -1.548804               | -2.263127 | 0.293118  |
| 12            | 6             | 0           | -0.775803               | -3.184858 | 0.920454  |
| 13            | 8             | 0           | -0.128712               | -2.611607 | 1.955222  |
| 14            | 8             | 0           | -0.641812               | -4.356196 | 0.612075  |
| 15            | 6             | 0           | 0.704313                | -3.461196 | 2.728782  |
| 16            | 1             | 0           | 0.080646                | -4.132022 | 3.332419  |

|    |   |   |           |           |           |
|----|---|---|-----------|-----------|-----------|
| 46 | 6 | 0 | -1.132351 | -2.232335 | -2.219376 |
| 47 | 1 | 0 | -0.929639 | -1.158313 | -2.197514 |
| 48 | 6 | 0 | -1.758484 | -2.622342 | -3.574726 |
| 49 | 1 | 0 | -1.193816 | -3.438272 | -4.036278 |
| 50 | 1 | 0 | -1.680289 | -1.771068 | -4.257938 |
| 51 | 6 | 0 | -1.580601 | 5.781742  | 2.381448  |
| 52 | 6 | 0 | -2.352907 | 4.551317  | 1.958076  |
| 53 | 6 | 0 | -1.703467 | 3.912603  | 0.899315  |
| 54 | 6 | 0 | -0.237667 | 5.599710  | 1.644956  |
| 55 | 1 | 0 | -2.089593 | 6.700539  | 2.063958  |
| 56 | 1 | 0 | -1.461994 | 5.840911  | 3.467575  |
| 57 | 1 | 0 | 0.436007  | 4.978913  | 2.245761  |
| 58 | 1 | 0 | 0.271589  | 6.542971  | 1.424142  |
| 59 | 6 | 0 | -0.614352 | 4.815485  | 0.358537  |
| 60 | 6 | 0 | -1.214925 | 5.798569  | -0.689566 |
| 61 | 6 | 0 | 0.597449  | 4.312049  | -0.404302 |
| 62 | 6 | 0 | 0.008753  | 6.414224  | -1.384479 |
| 63 | 1 | 0 | -1.882560 | 6.535099  | -0.232724 |
| 64 | 1 | 0 | -1.795491 | 5.216461  | -1.414324 |
| 65 | 6 | 0 | 0.997790  | 5.274024  | -1.336915 |
| 66 | 1 | 0 | -0.200006 | 6.744633  | -2.406361 |
| 67 | 1 | 0 | 0.384841  | 7.285488  | -0.832876 |
| 68 | 6 | 0 | -3.532631 | 4.031732  | 2.471341  |
| 69 | 6 | 0 | -4.034574 | 2.851194  | 1.930294  |
| 70 | 6 | 0 | -3.345443 | 2.128879  | 0.947047  |
| 71 | 6 | 0 | -2.155978 | 2.678940  | 0.451549  |
| 72 | 1 | 0 | -4.059436 | 4.532175  | 3.278888  |
| 73 | 1 | 0 | -4.970287 | 2.443607  | 2.301573  |

|     |    |   |           |           |           |
|-----|----|---|-----------|-----------|-----------|
| 74  | 6  | 0 | 1.313512  | 3.123437  | -0.282725 |
| 75  | 6  | 0 | 2.469002  | 2.911670  | -1.049751 |
| 76  | 6  | 0 | 2.880719  | 3.930633  | -1.919420 |
| 77  | 6  | 0 | 2.150922  | 5.101306  | -2.087069 |
| 78  | 1  | 0 | 3.796142  | 3.777256  | -2.483326 |
| 79  | 1  | 0 | 2.472672  | 5.856011  | -2.799051 |
| 80  | 8  | 0 | -1.411115 | 1.990300  | -0.489175 |
| 81  | 8  | 0 | -0.667650 | 0.290805  | 1.312130  |
| 82  | 8  | 0 | 0.350750  | 0.326492  | -1.086649 |
| 83  | 15 | 0 | -0.206298 | 1.050182  | 0.115449  |
| 84  | 8  | 0 | 0.881451  | 2.170189  | 0.623173  |
| 85  | 6  | 0 | 3.303709  | 1.669725  | -1.006362 |
| 86  | 6  | 0 | 3.353702  | 0.823716  | -2.131762 |
| 87  | 6  | 0 | 4.153753  | 1.431005  | 0.095839  |
| 88  | 6  | 0 | 4.266176  | -0.237063 | -2.139072 |
| 89  | 6  | 0 | 5.058475  | 0.373265  | 0.029349  |
| 90  | 6  | 0 | 5.134210  | -0.471254 | -1.078877 |
| 91  | 1  | 0 | 4.303034  | -0.884992 | -3.011028 |
| 92  | 1  | 0 | 5.727948  | 0.186589  | 0.866738  |
| 93  | 6  | 0 | -3.914905 | 0.829214  | 0.471878  |
| 94  | 6  | 0 | -4.167225 | -0.206853 | 1.396984  |
| 95  | 6  | 0 | -4.336682 | 0.677758  | -0.870632 |
| 96  | 6  | 0 | -4.876731 | -1.339966 | 0.978109  |
| 97  | 6  | 0 | -5.063785 | -0.457908 | -1.225788 |
| 98  | 6  | 0 | -5.367453 | -1.473182 | -0.316441 |
| 99  | 1  | 0 | -5.065513 | -2.125402 | 1.704895  |
| 100 | 1  | 0 | -5.421783 | -0.554796 | -2.250880 |
| 101 | 6  | 0 | -3.751209 | -0.134610 | 2.863287  |
| 102 | 1  | 0 | -3.179047 | 0.783337  | 3.014232  |
| 103 | 6  | 0 | -4.989177 | -0.093326 | 3.771316  |
| 104 | 1  | 0 | -5.542123 | -1.038210 | 3.718876  |
| 105 | 1  | 0 | -4.690713 | 0.060386  | 4.813508  |
| 106 | 1  | 0 | -5.680728 | 0.707144  | 3.490277  |
| 107 | 6  | 0 | -2.834194 | -1.291497 | 3.275252  |
| 108 | 1  | 0 | -2.669798 | -1.262840 | 4.358390  |
| 109 | 1  | 0 | -3.268844 | -2.267686 | 3.029354  |
| 110 | 1  | 0 | -1.864025 | -1.204362 | 2.785947  |
| 111 | 6  | 0 | -4.056593 | 1.705851  | -1.957715 |
| 112 | 1  | 0 | -3.569627 | 2.572637  | -1.505992 |
| 113 | 6  | 0 | -5.348217 | 2.206662  | -2.615879 |
| 114 | 1  | 0 | -5.865661 | 1.404878  | -3.153511 |
| 115 | 1  | 0 | -6.038125 | 2.611682  | -1.869492 |
| 116 | 1  | 0 | -5.121533 | 2.996352  | -3.339767 |
| 117 | 6  | 0 | -3.094180 | 1.126485  | -3.003658 |
| 118 | 1  | 0 | -2.870821 | 1.871310  | -3.775241 |
| 119 | 1  | 0 | -2.150186 | 0.828896  | -2.535898 |
| 120 | 1  | 0 | -3.540465 | 0.254769  | -3.500172 |
| 121 | 6  | 0 | -6.253155 | -2.624828 | -0.762224 |
| 122 | 1  | 0 | -5.886414 | -2.953590 | -1.744917 |
| 123 | 6  | 0 | -7.696166 | -2.128829 | -0.938213 |
| 124 | 1  | 0 | -8.342029 | -2.934141 | -1.304210 |
| 125 | 1  | 0 | -8.092854 | -1.780024 | 0.021587  |
| 126 | 1  | 0 | -7.749778 | -1.295433 | -1.644942 |
| 127 | 6  | 0 | -6.224411 | -3.829587 | 0.175292  |
| 128 | 1  | 0 | -6.678059 | -3.586164 | 1.142649  |
| 129 | 1  | 0 | -6.797083 | -4.655954 | -0.257113 |
| 130 | 1  | 0 | -5.202221 | -4.175090 | 0.353466  |

|     |   |   |          |           |           |
|-----|---|---|----------|-----------|-----------|
| 131 | 6 | 0 | 2.511348 | 1.061638  | -3.380685 |
| 132 | 1 | 0 | 1.751619 | 1.810716  | -3.141215 |
| 133 | 6 | 0 | 1.767941 | -0.190130 | -3.859686 |
| 134 | 1 | 0 | 1.208770 | 0.041402  | -4.773082 |
| 135 | 1 | 0 | 2.452047 | -1.013773 | -4.093826 |
| 136 | 1 | 0 | 1.058643 | -0.517233 | -3.100492 |
| 137 | 6 | 0 | 3.392430 | 1.594016  | -4.521014 |
| 138 | 1 | 0 | 2.783141 | 1.818735  | -5.402885 |
| 139 | 1 | 0 | 3.928509 | 2.503094  | -4.236620 |
| 140 | 1 | 0 | 4.139654 | 0.845241  | -4.808922 |
| 141 | 6 | 0 | 4.144993 | 2.353858  | 1.306764  |
| 142 | 1 | 0 | 3.112213 | 2.677954  | 1.469203  |
| 143 | 6 | 0 | 4.611872 | 1.666765  | 2.592162  |
| 144 | 1 | 0 | 4.403735 | 2.309419  | 3.453954  |
| 145 | 1 | 0 | 4.098588 | 0.712623  | 2.748218  |
| 146 | 1 | 0 | 5.691711 | 1.480164  | 2.582100  |
| 147 | 6 | 0 | 5.005888 | 3.596234  | 1.036084  |
| 148 | 1 | 0 | 6.044360 | 3.299018  | 0.849937  |
| 149 | 1 | 0 | 4.647407 | 4.151658  | 0.165100  |
| 150 | 1 | 0 | 4.993025 | 4.268358  | 1.900929  |
| 151 | 6 | 0 | 6.161366 | -1.588126 | -1.094414 |
| 152 | 1 | 0 | 6.243562 | -1.960952 | -0.063393 |
| 153 | 6 | 0 | 7.534739 | -1.039687 | -1.505488 |
| 154 | 1 | 0 | 8.294806 | -1.828018 | -1.479891 |
| 155 | 1 | 0 | 7.489426 | -0.639295 | -2.524259 |
| 156 | 1 | 0 | 7.852278 | -0.230520 | -0.841205 |
| 157 | 6 | 0 | 5.766155 | -2.766312 | -1.984380 |
| 158 | 1 | 0 | 6.443153 | -3.610709 | -1.820182 |
| 159 | 1 | 0 | 4.743896 | -3.097583 | -1.774648 |
| 160 | 1 | 0 | 5.826975 | -2.498855 | -3.045189 |

-----

**3aa**

M06-2X/6-31g(d) in gas phase

SCF Done: E(RM062X) = -1149.188720 hartree

Sum of electronic and thermal Free Energies = -1148.829908 hartree

The number of imaginary frequency = 0

-----

| Center Number | Atomic Number | Atomic Type | Coordinates (Angstroms) |           |           |
|---------------|---------------|-------------|-------------------------|-----------|-----------|
|               |               |             | X                       | Y         | Z         |
| 1             | 6             | 0           | -5.473353               | -0.586475 | 0.394417  |
| 2             | 1             | 0           | -5.687322               | -1.543254 | 0.893492  |
| 3             | 1             | 0           | -6.427644               | -0.057569 | 0.324066  |
| 4             | 6             | 0           | -4.888697               | -0.857732 | -0.965307 |
| 5             | 1             | 0           | -5.488696               | -0.696773 | -1.856354 |
| 6             | 6             | 0           | -3.634675               | -1.302945 | -1.048733 |
| 7             | 1             | 0           | -3.140246               | -1.513793 | -1.988462 |
| 8             | 6             | 0           | -2.890513               | -1.516433 | 0.242857  |
| 9             | 1             | 0           | -3.389564               | -2.337909 | 0.776575  |
| 10            | 1             | 0           | -1.067851               | -2.278672 | 0.926094  |
| 11            | 7             | 0           | -1.511672               | -1.957853 | 0.074187  |
| 12            | 6             | 0           | -0.632598               | -1.321748 | -0.763977 |
| 13            | 8             | 0           | 0.639596                | -1.589448 | -0.386047 |
| 14            | 8             | 0           | -0.914740               | -0.647886 | -1.729923 |
| 15            | 6             | 0           | 1.637527                | -0.973637 | -1.195941 |

|    |   |   |           |           |           |    |   |   |           |           |           |
|----|---|---|-----------|-----------|-----------|----|---|---|-----------|-----------|-----------|
| 16 | 1 | 0 | 1.644771  | -1.450166 | -2.183342 | 11 | 7 | 0 | 0.831566  | -2.068595 | -1.448861 |
| 17 | 1 | 0 | 1.382088  | 0.082702  | -1.342219 | 12 | 6 | 0 | 1.956576  | -2.598976 | -0.846820 |
| 18 | 6 | 0 | 2.979969  | -1.093550 | -0.523265 | 13 | 8 | 0 | 2.813404  | -1.625296 | -0.520012 |
| 19 | 6 | 0 | 3.150775  | -1.726250 | 0.705454  | 14 | 8 | 0 | 2.134063  | -3.780204 | -0.642736 |
| 20 | 6 | 0 | 4.082320  | -0.500716 | -1.143705 | 15 | 6 | 0 | 3.998693  | -2.068903 | 0.141350  |
| 21 | 6 | 0 | 4.406594  | -1.756006 | 1.310680  | 16 | 1 | 0 | 4.333759  | -1.195613 | 0.701743  |
| 22 | 1 | 0 | 2.295303  | -2.182205 | 1.191259  | 17 | 1 | 0 | 3.740809  | -2.867302 | 0.843804  |
| 23 | 6 | 0 | 5.334838  | -0.531799 | -0.542061 | 18 | 6 | 0 | 5.071126  | -2.537598 | -0.811056 |
| 24 | 1 | 0 | 3.950988  | 0.003721  | -2.098756 | 19 | 6 | 0 | 6.317592  | -2.882078 | -0.280596 |
| 25 | 6 | 0 | 5.500455  | -1.158513 | 0.692674  | 20 | 6 | 0 | 4.866353  | -2.642062 | -2.184088 |
| 26 | 1 | 0 | 4.527643  | -2.248492 | 2.270968  | 21 | 6 | 0 | 7.346262  | -3.312634 | -1.110646 |
| 27 | 1 | 0 | 6.182499  | -0.064122 | -1.033887 | 22 | 1 | 0 | 6.479920  | -2.806898 | 0.793708  |
| 28 | 1 | 0 | 6.476890  | -1.181780 | 1.166544  | 23 | 6 | 0 | 5.897680  | -3.072655 | -3.017710 |
| 29 | 6 | 0 | 2.377177  | 2.843925  | -0.236073 | 24 | 1 | 0 | 3.901776  | -2.382405 | -2.608194 |
| 30 | 6 | 0 | 1.128177  | 3.062372  | -0.763626 | 25 | 6 | 0 | 7.138553  | -3.407074 | -2.485959 |
| 31 | 6 | 0 | 0.003882  | 2.361353  | -0.258807 | 26 | 1 | 0 | 8.310418  | -3.574226 | -0.685358 |
| 32 | 6 | 0 | 0.183396  | 1.440903  | 0.807187  | 27 | 1 | 0 | 5.725719  | -3.147195 | -4.087139 |
| 33 | 6 | 0 | 1.479441  | 1.254177  | 1.351574  | 28 | 1 | 0 | 7.940232  | -3.741373 | -3.136962 |
| 34 | 6 | 0 | 2.553743  | 1.931485  | 0.833144  | 29 | 1 | 0 | -0.373509 | -1.506668 | 1.106376  |
| 35 | 1 | 0 | -1.481866 | 3.189568  | -1.604014 | 30 | 6 | 0 | 3.497650  | -2.301997 | 3.697492  |
| 36 | 1 | 0 | 3.237721  | 3.368591  | -0.639484 | 31 | 6 | 0 | 2.916601  | -3.519812 | 3.415703  |
| 37 | 1 | 0 | 0.985300  | 3.760247  | -1.584747 | 32 | 6 | 0 | 1.747020  | -3.584404 | 2.630558  |
| 38 | 6 | 0 | -1.304677 | 2.492994  | -0.788432 | 33 | 6 | 0 | 1.184275  | -2.382269 | 2.154750  |
| 39 | 1 | 0 | 1.590386  | 0.531775  | 2.153656  | 34 | 6 | 0 | 1.785717  | -1.138318 | 2.427606  |
| 40 | 1 | 0 | 3.550400  | 1.747345  | 1.223781  | 35 | 6 | 0 | 2.930052  | -1.112264 | 3.194647  |
| 41 | 6 | 0 | -2.024494 | 0.783362  | 0.743281  | 36 | 1 | 0 | 1.512035  | -5.743009 | 2.629058  |
| 42 | 6 | 0 | -2.312318 | 1.711698  | -0.298756 | 37 | 1 | 0 | 4.398318  | -2.254126 | 4.301270  |
| 43 | 1 | 0 | -3.305950 | 1.749126  | -0.730812 | 38 | 1 | 0 | 3.349957  | -4.443909 | 3.787952  |
| 44 | 7 | 0 | -0.834338 | 0.675796  | 1.293847  | 39 | 6 | 0 | 1.089864  | -4.805087 | 2.278738  |
| 45 | 6 | 0 | -3.024814 | -0.261698 | 1.186082  | 40 | 1 | 0 | 1.345366  | -0.233347 | 2.017479  |
| 46 | 1 | 0 | -2.683380 | -0.589067 | 2.173170  | 41 | 1 | 0 | 3.408206  | -0.158643 | 3.397059  |
| 47 | 6 | 0 | -4.491496 | 0.224338  | 1.268363  | 42 | 6 | 0 | -0.610510 | -3.566689 | 1.072244  |
| 48 | 1 | 0 | -4.545217 | 1.273049  | 0.962654  | 43 | 6 | 0 | -0.038976 | -4.801917 | 1.524461  |
| 49 | 1 | 0 | -4.826976 | 0.196110  | 2.309161  | 44 | 1 | 0 | -0.536376 | -5.729003 | 1.268466  |
|    |   |   |           |           |           | 45 | 7 | 0 | 0.036952  | -2.433751 | 1.401700  |
|    |   |   |           |           |           | 46 | 6 | 0 | -1.832890 | -3.444251 | 0.353874  |
|    |   |   |           |           |           | 47 | 1 | 0 | -2.201569 | -2.428449 | 0.217247  |
|    |   |   |           |           |           | 48 | 6 | 0 | -2.605113 | -4.496923 | -0.107284 |
|    |   |   |           |           |           | 49 | 1 | 0 | -2.351918 | -5.524187 | 0.141771  |
|    |   |   |           |           |           | 50 | 1 | 0 | -3.658282 | -4.312144 | -0.267845 |
|    |   |   |           |           |           | 51 | 6 | 0 | -3.301048 | 5.467352  | 1.784212  |
|    |   |   |           |           |           | 52 | 6 | 0 | -3.728686 | 4.046735  | 1.495755  |
|    |   |   |           |           |           | 53 | 6 | 0 | -2.906670 | 3.477586  | 0.519390  |
|    |   |   |           |           |           | 54 | 6 | 0 | -1.914285 | 5.528692  | 1.120370  |
|    |   |   |           |           |           | 55 | 1 | 0 | -3.993707 | 6.187400  | 1.329934  |
|    |   |   |           |           |           | 56 | 1 | 0 | -3.270139 | 5.683969  | 2.856323  |
|    |   |   |           |           |           | 57 | 1 | 0 | -1.155007 | 5.148429  | 1.813569  |
|    |   |   |           |           |           | 58 | 1 | 0 | -1.617879 | 6.534946  | 0.809294  |
|    |   |   |           |           |           | 59 | 6 | 0 | -2.017207 | 4.543920  | -0.080008 |
|    |   |   |           |           |           | 60 | 6 | 0 | -2.702601 | 5.255977  | -1.279247 |
|    |   |   |           |           |           | 61 | 6 | 0 | -0.649255 | 4.273865  | -0.667164 |
|    |   |   |           |           |           | 62 | 6 | 0 | -1.575767 | 6.089481  | -1.917772 |
|    |   |   |           |           |           | 63 | 1 | 0 | -3.568778 | 5.849940  | -0.971777 |
|    |   |   |           |           |           | 64 | 1 | 0 | -3.045533 | 4.490870  | -1.985010 |
|    |   |   |           |           |           | 65 | 6 | 0 | -0.347118 | 5.263761  | -1.607548 |
|    |   |   |           |           |           | 66 | 1 | 0 | -1.715013 | 6.237133  | -2.993026 |
|    |   |   |           |           |           | 67 | 1 | 0 | -1.508469 | 7.085904  | -1.462896 |

### R\_exo

M06-2X/6-31g(d) in gas phase

SCF Done: E(RM062X) = -3617.178724 hartree

Sum of electronic and thermal Free Energies = -3615.906268 hartree

The number of imaginary frequency = 1

Imaginary frequency = -386.92

| Center Number | Atomic Number | Atomic Type | Coordinates (Angstroms) |           |           |
|---------------|---------------|-------------|-------------------------|-----------|-----------|
|               |               |             | X                       | Y         | Z         |
| 1             | 6             | 0           | -2.309844               | -4.792850 | -2.215096 |
| 2             | 1             | 0           | -1.367793               | -5.293984 | -2.016860 |
| 3             | 1             | 0           | -3.132316               | -5.461528 | -2.450253 |
| 4             | 6             | 0           | -2.327938               | -3.499500 | -2.704248 |
| 5             | 1             | 0           | -3.254735               | -3.128807 | -3.139117 |
| 6             | 6             | 0           | -1.304301               | -2.552341 | -2.488140 |
| 7             | 1             | 0           | -1.458779               | -1.509989 | -2.748928 |
| 8             | 6             | 0           | -0.153921               | -2.916728 | -1.837758 |
| 9             | 1             | 0           | 0.086817                | -3.957126 | -1.647949 |
| 10            | 1             | 0           | 0.668390                | -1.037726 | -1.466043 |

|     |    |   |           |           |           |     |   |   |           |           |           |
|-----|----|---|-----------|-----------|-----------|-----|---|---|-----------|-----------|-----------|
| 68  | 6  | 0 | -4.769278 | 3.319257  | 2.053598  | 125 | 1 | 0 | 5.638152  | -0.813754 | 2.385762  |
| 69  | 6  | 0 | -4.964576 | 2.010302  | 1.628059  | 126 | 1 | 0 | 7.392870  | -0.560850 | 2.402844  |
| 70  | 6  | 0 | -4.104843 | 1.385018  | 0.714466  | 127 | 6 | 0 | 7.489060  | 1.609995  | 0.703208  |
| 71  | 6  | 0 | -3.048268 | 2.136866  | 0.182221  | 128 | 1 | 0 | 8.473428  | 1.176810  | 0.911077  |
| 72  | 1  | 0 | -5.425320 | 3.761065  | 2.798206  | 129 | 1 | 0 | 7.500414  | 2.029826  | -0.306677 |
| 73  | 1  | 0 | -5.795829 | 1.431820  | 2.021565  | 130 | 1 | 0 | 7.318964  | 2.432195  | 1.407550  |
| 74  | 6  | 0 | 0.302581  | 3.318510  | -0.334584 | 131 | 6 | 0 | -4.730386 | 0.680528  | -2.136609 |
| 75  | 6  | 0 | 1.620226  | 3.447501  | -0.794830 | 132 | 1 | 0 | -4.436956 | 1.649870  | -1.728433 |
| 76  | 6  | 0 | 1.916677  | 4.507368  | -1.659508 | 133 | 6 | 0 | -6.117480 | 0.863826  | -2.767405 |
| 77  | 6  | 0 | 0.938812  | 5.389350  | -2.109975 | 134 | 1 | 0 | -6.454108 | -0.045629 | -3.276691 |
| 78  | 1  | 0 | 2.943388  | 4.623095  | -1.992168 | 135 | 1 | 0 | -6.863535 | 1.122083  | -2.009647 |
| 79  | 1  | 0 | 1.186878  | 6.168962  | -2.824687 | 136 | 1 | 0 | -6.089277 | 1.666877  | -3.511142 |
| 80  | 8  | 0 | -2.177284 | 1.575934  | -0.730102 | 137 | 6 | 0 | -3.691835 | 0.296723  | -3.196116 |
| 81  | 8  | 0 | -0.989376 | -0.010747 | 0.923013  | 138 | 1 | 0 | -3.707453 | 1.015417  | -4.022602 |
| 82  | 8  | 0 | -0.014374 | 0.532449  | -1.443032 | 139 | 1 | 0 | -2.687254 | 0.297927  | -2.765322 |
| 83  | 15 | 0 | -0.749208 | 0.952271  | -0.208021 | 140 | 1 | 0 | -3.905731 | -0.695180 | -3.614847 |
| 84  | 8  | 0 | -0.041735 | 2.264307  | 0.493163  | 141 | 6 | 0 | -6.209332 | -3.868739 | -0.549668 |
| 85  | 6  | 0 | 2.726967  | 2.556022  | -0.337635 | 142 | 1 | 0 | -5.772539 | -4.633410 | 0.108786  |
| 86  | 6  | 0 | 3.464797  | 1.804292  | -1.276371 | 143 | 6 | 0 | -4.078583 | -0.783058 | 2.773284  |
| 87  | 6  | 0 | 3.124604  | 2.578364  | 1.015290  | 144 | 1 | 0 | -3.707392 | 0.240151  | 2.863354  |
| 88  | 6  | 0 | 4.608677  | 1.129522  | -0.847622 | 145 | 6 | 0 | -5.253757 | -0.954325 | 3.744416  |
| 89  | 6  | 0 | 4.271909  | 1.877021  | 1.396016  | 146 | 1 | 0 | -5.613500 | -1.989372 | 3.751208  |
| 90  | 6  | 0 | 5.045436  | 1.172371  | 0.476140  | 147 | 1 | 0 | -4.942896 | -0.704772 | 4.764162  |
| 91  | 1  | 0 | 5.194037  | 0.559142  | -1.569401 | 148 | 1 | 0 | -6.099361 | -0.312679 | 3.477685  |
| 92  | 1  | 0 | 4.594846  | 1.933152  | 2.434338  | 149 | 6 | 0 | -2.919351 | -1.705612 | 3.164512  |
| 93  | 6  | 0 | -4.409123 | -0.023429 | 0.325229  | 150 | 1 | 0 | -2.667902 | -1.567827 | 4.221914  |
| 94  | 6  | 0 | -4.508473 | -1.014743 | 1.328889  | 151 | 1 | 0 | -3.170093 | -2.761689 | 3.008946  |
| 95  | 6  | 0 | -4.769970 | -0.334804 | -1.001320 | 152 | 1 | 0 | -2.038813 | -1.458332 | 2.568957  |
| 96  | 6  | 0 | -5.041131 | -2.258751 | 0.994750  | 153 | 6 | 0 | -7.681556 | -3.704217 | -0.144784 |
| 97  | 6  | 0 | -5.275212 | -1.607995 | -1.287298 | 154 | 1 | 0 | -8.155295 | -2.933505 | -0.762537 |
| 98  | 6  | 0 | -5.467029 | -2.566746 | -0.297307 | 155 | 1 | 0 | -8.231591 | -4.641585 | -0.280934 |
| 99  | 1  | 0 | -5.145751 | -3.015841 | 1.772105  | 156 | 1 | 0 | -7.770085 | -3.397538 | 0.901401  |
| 100 | 1  | 0 | -5.579099 | -1.825643 | -2.308615 | 157 | 6 | 0 | -6.112238 | -4.369358 | -1.990566 |
| 101 | 6  | 0 | 3.090842  | 1.748612  | -2.752070 | 158 | 1 | 0 | -6.663848 | -3.714932 | -2.673908 |
| 102 | 1  | 0 | 2.111612  | 2.218730  | -2.873666 | 159 | 1 | 0 | -5.073316 | -4.412049 | -2.332174 |
| 103 | 6  | 0 | 4.118686  | 2.504419  | -3.606577 | 160 | 1 | 0 | -6.545606 | -5.370462 | -2.076382 |
| 104 | 1  | 0 | 5.100319  | 2.021303  | -3.538729 |     |   |   |           |           |           |
| 105 | 1  | 0 | 3.815766  | 2.502718  | -4.659041 |     |   |   |           |           |           |
| 106 | 1  | 0 | 4.241120  | 3.543411  | -3.288554 |     |   |   |           |           |           |
| 107 | 6  | 0 | 2.966605  | 0.313198  | -3.267011 |     |   |   |           |           |           |
| 108 | 1  | 0 | 2.632091  | 0.320043  | -4.309898 |     |   |   |           |           |           |
| 109 | 1  | 0 | 3.929655  | -0.207245 | -3.227897 |     |   |   |           |           |           |
| 110 | 1  | 0 | 2.241854  | -0.247290 | -2.675596 |     |   |   |           |           |           |
| 111 | 6  | 0 | 2.419788  | 3.423414  | 2.069530  |     |   |   |           |           |           |
| 112 | 1  | 0 | 1.590614  | 3.952432  | 1.595023  |     |   |   |           |           |           |
| 113 | 6  | 0 | 3.366649  | 4.491595  | 2.632950  |     |   |   |           |           |           |
| 114 | 1  | 0 | 4.204747  | 4.038957  | 3.174229  |     |   |   |           |           |           |
| 115 | 1  | 0 | 3.779419  | 5.110535  | 1.830457  |     |   |   |           |           |           |
| 116 | 1  | 0 | 2.832029  | 5.143685  | 3.331714  |     |   |   |           |           |           |
| 117 | 6  | 0 | 1.827405  | 2.568106  | 3.193243  |     |   |   |           |           |           |
| 118 | 1  | 0 | 1.328793  | 3.204841  | 3.932244  |     |   |   |           |           |           |
| 119 | 1  | 0 | 1.086875  | 1.867066  | 2.798455  |     |   |   |           |           |           |
| 120 | 1  | 0 | 2.609461  | 2.007304  | 3.719634  |     |   |   |           |           |           |
| 121 | 6  | 0 | 6.383337  | 0.553950  | 0.844452  |     |   |   |           |           |           |
| 122 | 1  | 0 | 6.586117  | -0.241025 | 0.114554  |     |   |   |           |           |           |
| 123 | 6  | 0 | 6.428066  | -0.068056 | 2.242132  |     |   |   |           |           |           |
| 124 | 1  | 0 | 6.318582  | 0.693076  | 3.022932  |     |   |   |           |           |           |

**R\_exo2**

M06-2X/6-31g(d) in gas phase

SCF Done: E(RM062X) = -3617.176596 hartree

Sum of electronic and thermal Free Energies = -3615.903415 hartree

The number of imaginary frequency = 1

Imaginary frequency = -349.67

| Center Number | Atomic Number | Atomic Type | Coordinates (Angstroms) |           |          |
|---------------|---------------|-------------|-------------------------|-----------|----------|
|               |               |             | X                       | Y         | Z        |
| 1             | 6             | 0           | 3.388170                | -2.286545 | 4.411989 |
| 2             | 1             | 0           | 3.013688                | -3.250908 | 4.080865 |
| 3             | 1             | 0           | 4.293070                | -2.326480 | 5.010713 |
| 4             | 6             | 0           | 2.543680                | -1.203715 | 4.525557 |
| 5             | 1             | 0           | 2.904201                | -0.332805 | 5.069275 |
| 6             | 6             | 0           | 1.341124                | -1.047536 | 3.802219 |
| 7             | 1             | 0           | 0.867119                | -0.071566 | 3.748601 |
| 8             | 6             | 0           | 0.828566                | -2.058264 | 3.029243 |



|    |   |   |           |           |           |     |    |   |           |           |           |
|----|---|---|-----------|-----------|-----------|-----|----|---|-----------|-----------|-----------|
| 9  | 1 | 0 | 1.159476  | -3.089568 | 3.114460  | 66  | 1  | 0 | -0.437904 | 6.716160  | 2.112373  |
| 10 | 1 | 0 | -0.487419 | -0.902065 | 1.952561  | 67  | 1  | 0 | -1.216423 | 7.142061  | 0.590387  |
| 11 | 7 | 0 | -0.208408 | -1.880374 | 2.169957  | 68  | 6  | 0 | 2.513032  | 4.107964  | -3.154030 |
| 12 | 6 | 0 | -0.854356 | -2.946046 | 1.592936  | 69  | 6  | 0 | 3.267085  | 3.059714  | -2.637919 |
| 13 | 8 | 0 | -1.872723 | -2.493741 | 0.837842  | 70  | 6  | 0 | 2.890192  | 2.369628  | -1.477436 |
| 14 | 8 | 0 | -0.555319 | -4.109090 | 1.755103  | 71  | 6  | 0 | 1.738343  | 2.795902  | -0.801909 |
| 15 | 6 | 0 | -2.811517 | -3.474203 | 0.394265  | 72  | 1  | 0 | 2.805779  | 4.593667  | -4.080575 |
| 16 | 1 | 0 | -2.333459 | -4.457416 | 0.414054  | 73  | 1  | 0 | 4.169296  | 2.737308  | -3.151144 |
| 17 | 1 | 0 | -3.641927 | -3.472245 | 1.112634  | 74  | 6  | 0 | -1.686508 | 2.841312  | 0.352674  |
| 18 | 6 | 0 | -3.297657 | -3.161756 | -0.997209 | 75  | 6  | 0 | -2.870707 | 2.617138  | 1.076143  |
| 19 | 6 | 0 | -3.932806 | -4.180517 | -1.712397 | 76  | 6  | 0 | -3.384410 | 3.670595  | 1.839498  |
| 20 | 6 | 0 | -3.089262 | -1.923433 | -1.602564 | 77  | 6  | 0 | -2.724112 | 4.891601  | 1.959285  |
| 21 | 6 | 0 | -4.327487 | -3.982731 | -3.031578 | 78  | 1  | 0 | -4.338789 | 3.523305  | 2.334873  |
| 22 | 1 | 0 | -4.091754 | -5.147282 | -1.238941 | 79  | 1  | 0 | -3.120556 | 5.672339  | 2.602366  |
| 23 | 6 | 0 | -3.462916 | -1.734642 | -2.933501 | 80  | 8  | 0 | 1.325515  | 2.166851  | 0.353663  |
| 24 | 1 | 0 | -2.607726 | -1.120763 | -1.047812 | 81  | 8  | 0 | 0.519230  | -0.086629 | -0.628182 |
| 25 | 6 | 0 | -4.076816 | -2.759190 | -3.651867 | 82  | 8  | 0 | -0.182883 | 0.756330  | 1.741520  |
| 26 | 1 | 0 | -4.814356 | -4.784772 | -3.578113 | 83  | 15 | 0 | 0.138016  | 1.029025  | 0.303830  |
| 27 | 1 | 0 | -3.265248 | -0.780655 | -3.410344 | 84  | 8  | 0 | -1.113893 | 1.830538  | -0.406110 |
| 28 | 1 | 0 | -4.362654 | -2.603257 | -4.687684 | 85  | 6  | 0 | -3.708772 | 1.391222  | 0.884246  |
| 29 | 1 | 0 | 1.293151  | -1.589382 | -0.231199 | 86  | 6  | 0 | -3.830294 | 0.392887  | 1.875346  |
| 30 | 6 | 0 | -0.342783 | -5.439134 | -2.436021 | 87  | 6  | 0 | -4.479335 | 1.312047  | -0.291828 |
| 31 | 6 | 0 | 0.643410  | -5.834585 | -1.559608 | 88  | 6  | 0 | -4.697348 | -0.674124 | 1.637410  |
| 32 | 6 | 0 | 1.313976  | -4.880866 | -0.768086 | 89  | 6  | 0 | -5.332358 | 0.221463  | -0.480681 |
| 33 | 6 | 0 | 0.954016  | -3.522290 | -0.888740 | 90  | 6  | 0 | -5.454365 | -0.785697 | 0.469840  |
| 34 | 6 | 0 | -0.066505 | -3.122354 | -1.767796 | 91  | 1  | 0 | -4.795805 | -1.453459 | 2.391321  |
| 35 | 6 | 0 | -0.694608 | -4.078221 | -2.537155 | 92  | 1  | 0 | -5.904320 | 0.161247  | -1.402988 |
| 36 | 1 | 0 | 2.625037  | -6.253659 | 0.281056  | 93  | 6  | 0 | 3.763170  | 1.251818  | -1.008756 |
| 37 | 1 | 0 | -0.859120 | -6.173523 | -3.045325 | 94  | 6  | 0 | 3.982237  | 0.136166  | -1.846763 |
| 38 | 1 | 0 | 0.917421  | -6.881305 | -1.461732 | 95  | 6  | 0 | 4.491232  | 1.369861  | 0.191889  |
| 39 | 6 | 0 | 2.339357  | -5.211375 | 0.166533  | 96  | 6  | 0 | 4.922649  | -0.819661 | -1.466044 |
| 40 | 1 | 0 | -0.348047 | -2.074008 | -1.809364 | 97  | 6  | 0 | 5.469823  | 0.416958  | 0.492243  |
| 41 | 1 | 0 | -1.488429 | -3.773954 | -3.213462 | 98  | 6  | 0 | 5.708965  | -0.685243 | -0.322017 |
| 42 | 6 | 0 | 2.577522  | -2.872667 | 0.761353  | 99  | 1  | 0 | 5.066453  | -1.690542 | -2.103677 |
| 43 | 6 | 0 | 2.950979  | -4.247957 | 0.904492  | 100 | 1  | 0 | 6.051895  | 0.548016  | 1.400881  |
| 44 | 1 | 0 | 3.728260  | -4.503620 | 1.613925  | 101 | 6  | 0 | -3.082040 | 0.472668  | 3.201451  |
| 45 | 7 | 0 | 1.603817  | -2.584047 | -0.120581 | 102 | 1  | 0 | -2.120483 | 0.959474  | 3.005864  |
| 46 | 6 | 0 | 3.163868  | -1.803582 | 1.494999  | 103 | 6  | 0 | -3.856655 | 1.297485  | 4.242722  |
| 47 | 1 | 0 | 2.805424  | -0.803630 | 1.255143  | 104 | 1  | 0 | -4.869167 | 0.895029  | 4.364353  |
| 48 | 6 | 0 | 4.183529  | -1.950377 | 2.413841  | 105 | 1  | 0 | -3.351371 | 1.240404  | 5.213327  |
| 49 | 1 | 0 | 4.753818  | -2.872514 | 2.485826  | 106 | 1  | 0 | -3.934026 | 2.350082  | 3.970822  |
| 50 | 1 | 0 | 4.724798  | -1.059392 | 2.706299  | 107 | 6  | 0 | -2.814511 | -0.908168 | 3.816949  |
| 51 | 6 | 0 | 0.411989  | 5.625640  | -2.789960 | 108 | 1  | 0 | -2.009055 | -0.842046 | 4.555812  |
| 52 | 6 | 0 | 1.390975  | 4.524519  | -2.452272 | 109 | 1  | 0 | -3.703433 | -1.287756 | 4.335016  |
| 53 | 6 | 0 | 1.037453  | 3.909565  | -1.248886 | 110 | 1  | 0 | -2.531445 | -1.642265 | 3.061758  |
| 54 | 6 | 0 | -0.747404 | 5.337126  | -1.820029 | 111 | 6  | 0 | -4.452463 | 2.396506  | -1.362074 |
| 55 | 1 | 0 | 0.851711  | 6.613991  | -2.604457 | 112 | 1  | 0 | -3.799955 | 3.205312  | -1.024217 |
| 56 | 1 | 0 | 0.104445  | 5.603012  | -3.839829 | 113 | 6  | 0 | -5.845568 | 3.002176  | -1.570950 |
| 57 | 1 | 0 | -1.422282 | 4.593195  | -2.259519 | 114 | 1  | 0 | -6.553513 | 2.257166  | -1.949873 |
| 58 | 1 | 0 | -1.337553 | 6.221769  | -1.562301 | 115 | 1  | 0 | -6.243789 | 3.398056  | -0.631609 |
| 59 | 6 | 0 | -0.063260 | 4.699151  | -0.576101 | 116 | 1  | 0 | -5.800327 | 3.819924  | -2.298094 |
| 60 | 6 | 0 | 0.513375  | 5.818891  | 0.333802  | 117 | 6  | 0 | -3.879634 | 1.867917  | -2.680358 |
| 61 | 6 | 0 | -1.103327 | 4.101784  | 0.348596  | 118 | 1  | 0 | -3.816233 | 2.672150  | -3.421904 |
| 62 | 6 | 0 | -0.705478 | 6.330579  | 1.123901  | 119 | 1  | 0 | -2.875898 | 1.457530  | -2.526574 |
| 63 | 1 | 0 | 1.024864  | 6.598599  | -0.239001 | 120 | 1  | 0 | -4.521730 | 1.081572  | -3.094163 |
| 64 | 1 | 0 | 1.239091  | 5.366489  | 1.019237  | 121 | 6  | 0 | -6.396086 | -1.967121 | 0.303299  |
| 65 | 6 | 0 | -1.579660 | 5.098892  | 1.206978  | 122 | 1  | 0 | -5.832865 | -2.871799 | 0.577132  |

|     |   |   |           |           |           |    |   |   |           |           |           |
|-----|---|---|-----------|-----------|-----------|----|---|---|-----------|-----------|-----------|
| 123 | 6 | 0 | -6.899624 | -2.154354 | -1.126039 | 7  | 1 | 0 | 2.764630  | -1.165890 | 1.366415  |
| 124 | 1 | 0 | -7.578772 | -1.342156 | -1.410643 | 8  | 6 | 0 | 1.514929  | -2.873153 | 1.265001  |
| 125 | 1 | 0 | -6.073038 | -2.180029 | -1.842101 | 9  | 1 | 0 | 1.239106  | -3.847400 | 1.658072  |
| 126 | 1 | 0 | -7.455949 | -3.093371 | -1.209559 | 10 | 1 | 0 | 0.991116  | -1.645237 | -0.359867 |
| 127 | 6 | 0 | -7.580366 | -1.841778 | 1.272256  | 11 | 7 | 0 | 0.909814  | -2.580180 | 0.089353  |
| 128 | 1 | 0 | -8.241972 | -2.711068 | 1.192726  | 12 | 6 | 0 | 0.020450  | -3.479190 | -0.467549 |
| 129 | 1 | 0 | -7.244405 | -1.758073 | 2.309969  | 13 | 8 | 0 | -0.489071 | -2.961190 | -1.585340 |
| 130 | 1 | 0 | -8.162962 | -0.944688 | 1.035536  | 14 | 8 | 0 | -0.256017 | -4.564936 | -0.007179 |
| 131 | 6 | 0 | 4.277404  | 2.504156  | 1.184172  | 15 | 6 | 0 | -1.375724 | -3.802125 | -2.316067 |
| 132 | 1 | 0 | 3.551461  | 3.204247  | 0.764969  | 16 | 1 | 0 | -0.809456 | -4.655402 | -2.708077 |
| 133 | 6 | 0 | 5.568381  | 3.291045  | 1.440330  | 17 | 1 | 0 | -2.142596 | -4.192655 | -1.638672 |
| 134 | 1 | 0 | 6.331806  | 2.670290  | 1.921808  | 18 | 6 | 0 | -1.988366 | -2.992547 | -3.428041 |
| 135 | 1 | 0 | 5.986718  | 3.674403  | 0.504791  | 19 | 6 | 0 | -2.977037 | -3.588492 | -4.214269 |
| 136 | 1 | 0 | 5.368594  | 4.140448  | 2.101846  | 20 | 6 | 0 | -1.612802 | -1.672096 | -3.674494 |
| 137 | 6 | 0 | 3.691520  | 1.964670  | 2.496383  | 21 | 6 | 0 | -3.585890 | -2.876669 | -5.241616 |
| 138 | 1 | 0 | 3.497772  | 2.785871  | 3.195214  | 22 | 1 | 0 | -3.275446 | -4.615765 | -4.013871 |
| 139 | 1 | 0 | 2.746040  | 1.441509  | 2.319287  | 23 | 6 | 0 | -2.219589 | -0.965182 | -4.712770 |
| 140 | 1 | 0 | 4.395838  | 1.275805  | 2.981475  | 24 | 1 | 0 | -0.864984 | -1.193123 | -3.046885 |
| 141 | 6 | 0 | 6.767306  | -1.736893 | -0.018698 | 25 | 6 | 0 | -3.205555 | -1.559425 | -5.494829 |
| 142 | 1 | 0 | 6.241812  | -2.699605 | 0.081602  | 26 | 1 | 0 | -4.355525 | -3.348661 | -5.844961 |
| 143 | 6 | 0 | 3.262686  | -0.060886 | -3.175538 | 27 | 1 | 0 | -1.919769 | 0.061133  | -4.901633 |
| 144 | 1 | 0 | 2.584238  | 0.780690  | -3.330587 | 28 | 1 | 0 | -3.676155 | -1.001067 | -6.298212 |
| 145 | 6 | 0 | 4.257339  | -0.089085 | -4.342864 | 29 | 1 | 0 | -1.083703 | -0.963652 | 1.420688  |
| 146 | 1 | 0 | 4.923705  | -0.956331 | -4.273986 | 30 | 6 | 0 | -4.564998 | -3.226181 | -0.902915 |
| 147 | 1 | 0 | 3.722931  | -0.154281 | -5.296358 | 31 | 6 | 0 | -4.185857 | -3.999717 | 0.174510  |
| 148 | 1 | 0 | 4.884435  | 0.808107  | -4.360991 | 32 | 6 | 0 | -3.164793 | -3.559271 | 1.041445  |
| 149 | 6 | 0 | 2.394856  | -1.320154 | -3.160164 | 33 | 6 | 0 | -2.552898 | -2.311629 | 0.791229  |
| 150 | 1 | 0 | 1.928295  | -1.478647 | -4.138777 | 34 | 6 | 0 | -2.938866 | -1.524364 | -0.307372 |
| 151 | 1 | 0 | 2.975275  | -2.218046 | -2.914616 | 35 | 6 | 0 | -3.933812 | -1.988165 | -1.141553 |
| 152 | 1 | 0 | 1.604836  | -1.193460 | -2.419993 | 36 | 1 | 0 | -3.158570 | -5.272774 | 2.374285  |
| 153 | 6 | 0 | 7.759512  | -1.860359 | -1.184764 | 37 | 1 | 0 | -5.343476 | -3.569011 | -1.576911 |
| 154 | 1 | 0 | 8.303170  | -0.918152 | -1.313309 | 38 | 1 | 0 | -4.660879 | -4.957346 | 0.368977  |
| 155 | 1 | 0 | 8.489285  | -2.652667 | -0.988052 | 39 | 6 | 0 | -2.700041 | -4.309718 | 2.166873  |
| 156 | 1 | 0 | 7.258219  | -2.087330 | -2.129003 | 40 | 1 | 0 | -2.450953 | -0.566918 | -0.480572 |
| 157 | 6 | 0 | 7.545832  | -1.486153 | 1.272482  | 41 | 1 | 0 | -4.222730 | -1.390843 | -2.002230 |
| 158 | 1 | 0 | 8.100227  | -0.542714 | 1.212836  | 42 | 6 | 0 | -1.091242 | -2.572635 | 2.689516  |
| 159 | 1 | 0 | 6.895759  | -1.440063 | 2.150698  | 43 | 6 | 0 | -1.703553 | -3.840744 | 2.960868  |
| 160 | 1 | 0 | 8.271909  | -2.288719 | 1.434077  | 44 | 1 | 0 | -1.356296 | -4.411794 | 3.813207  |

**S\_exo**

M06-2X/6-31g(d) in gas phase

SCF Done: E(RM062X) = -3617.184958 hartree

Sum of electronic and thermal Free Energies = -3615.913170 hartree

The number of imaginary frequency = 1

Imaginary frequency = -392.60

| Center Number | Atomic Number | Atomic Type | Coordinates (Angstroms) |           |          |
|---------------|---------------|-------------|-------------------------|-----------|----------|
|               |               |             | X                       | Y         | Z        |
| 1             | 6             | 0           | 2.434137                | -3.348288 | 3.994076 |
| 2             | 1             | 0           | 1.929971                | -4.215747 | 3.578288 |
| 3             | 1             | 0           | 2.904634                | -3.517481 | 4.957914 |
| 4             | 6             | 0           | 2.939380                | -2.366097 | 3.161300 |
| 5             | 1             | 0           | 3.653661                | -1.659197 | 3.578631 |
| 6             | 6             | 0           | 2.448834                | -2.075271 | 1.871951 |

|    |   |   |           |           |           |
|----|---|---|-----------|-----------|-----------|
| 45 | 7 | 0 | -1.547765 | -1.882975 | 1.623909  |
| 46 | 6 | 0 | -0.068296 | -1.970626 | 3.469207  |
| 47 | 1 | 0 | 0.242570  | -0.983516 | 3.139829  |
| 48 | 6 | 0 | 0.549088  | -2.522602 | 4.578533  |
| 49 | 1 | 0 | 0.185892  | -3.447062 | 5.020183  |
| 50 | 1 | 0 | 1.022319  | -1.847771 | 5.281576  |
| 51 | 6 | 0 | 2.425889  | 5.356792  | -2.518997 |
| 52 | 6 | 0 | 2.982104  | 3.993953  | -2.175269 |
| 53 | 6 | 0 | 2.341693  | 3.472823  | -1.045843 |
| 54 | 6 | 0 | 1.145933  | 5.409011  | -1.667629 |
| 55 | 1 | 0 | 3.127146  | 6.152049  | -2.235492 |
| 56 | 1 | 0 | 2.230032  | 5.468163  | -3.589723 |
| 57 | 1 | 0 | 0.321861  | 4.927662  | -2.206542 |
| 58 | 1 | 0 | 0.833141  | 6.423501  | -1.402464 |
| 59 | 6 | 0 | 1.480823  | 4.547352  | -0.416740 |
| 60 | 6 | 0 | 2.290797  | 5.399787  | 0.600366  |
| 61 | 6 | 0 | 0.233514  | 4.269481  | 0.392297  |
| 62 | 6 | 0 | 1.222362  | 6.232389  | 1.332728  |
| 63 | 1 | 0 | 3.063582  | 6.004065  | 0.115490  |

|     |    |   |           |           |           |     |   |   |           |           |           |
|-----|----|---|-----------|-----------|-----------|-----|---|---|-----------|-----------|-----------|
| 64  | 1  | 0 | 2.781464  | 4.720046  | 1.306481  | 121 | 6 | 0 | 5.946277  | -3.648861 | 0.390293  |
| 65  | 6  | 0 | 0.017886  | 5.319092  | 1.289381  | 122 | 1 | 0 | 5.757115  | -4.354969 | -0.428571 |
| 66  | 1  | 0 | 1.511979  | 6.489354  | 2.356204  | 123 | 6 | 0 | 7.463928  | -3.472137 | 0.514710  |
| 67  | 1  | 0 | 1.022451  | 7.175818  | 0.809010  | 124 | 1 | 0 | 7.711948  | -2.798388 | 1.342256  |
| 68  | 6  | 0 | 3.979840  | 3.277935  | -2.817281 | 125 | 1 | 0 | 7.949337  | -4.433892 | 0.710961  |
| 69  | 6  | 0 | 4.324763  | 2.027035  | -2.315655 | 126 | 1 | 0 | 7.888007  | -3.049332 | -0.400568 |
| 70  | 6  | 0 | 3.644963  | 1.444783  | -1.240020 | 127 | 6 | 0 | 5.365023  | -4.252915 | 1.671901  |
| 71  | 6  | 0 | 2.618524  | 2.177372  | -0.624490 | 128 | 1 | 0 | 5.858141  | -5.202104 | 1.908294  |
| 72  | 1  | 0 | 4.490839  | 3.685145  | -3.685124 | 129 | 1 | 0 | 5.509034  | -3.575655 | 2.521796  |
| 73  | 1  | 0 | 5.133891  | 1.464463  | -2.771767 | 130 | 1 | 0 | 4.290479  | -4.431038 | 1.572456  |
| 74  | 6  | 0 | -0.693875 | 3.240552  | 0.285626  | 131 | 6 | 0 | -2.907700 | 1.834074  | 3.360729  |
| 75  | 6  | 0 | -1.920243 | 3.324578  | 0.961373  | 132 | 1 | 0 | -2.050352 | 2.506496  | 3.288655  |
| 76  | 6  | 0 | -2.146852 | 4.440068  | 1.778480  | 133 | 6 | 0 | -2.377280 | 0.517668  | 3.931085  |
| 77  | 6  | 0 | -1.178733 | 5.417544  | 1.983554  | 134 | 1 | 0 | -1.561150 | 0.164011  | 3.302401  |
| 78  | 1  | 0 | -3.106140 | 4.514689  | 2.283345  | 135 | 1 | 0 | -1.990393 | 0.667338  | 4.945223  |
| 79  | 1  | 0 | -1.364539 | 6.242935  | 2.664982  | 136 | 1 | 0 | -3.152537 | -0.256605 | 3.976751  |
| 80  | 8  | 0 | 1.901872  | 1.636060  | 0.431414  | 137 | 6 | 0 | -3.934878 | 2.466472  | 4.308507  |
| 81  | 8  | 0 | 0.638932  | -0.056510 | -1.064056 | 138 | 1 | 0 | -3.480926 | 2.665055  | 5.285107  |
| 82  | 8  | 0 | -0.114265 | 0.451173  | 1.374130  | 139 | 1 | 0 | -4.325409 | 3.409642  | 3.913242  |
| 83  | 15 | 0 | 0.464290  | 0.912633  | 0.065123  | 140 | 1 | 0 | -4.788166 | 1.797368  | 4.466406  |
| 84  | 8  | 0 | -0.415437 | 2.164539  | -0.537278 | 141 | 6 | 0 | -3.179214 | 2.782537  | -1.708167 |
| 85  | 6  | 0 | -3.003667 | 2.307045  | 0.823486  | 142 | 1 | 0 | -2.340908 | 3.444148  | -1.479444 |
| 86  | 6  | 0 | -3.494090 | 1.643072  | 1.967073  | 143 | 6 | 0 | -2.692284 | 1.753863  | -2.734506 |
| 87  | 6  | 0 | -3.628420 | 2.096973  | -0.425991 | 144 | 1 | 0 | -2.346136 | 2.259261  | -3.643834 |
| 88  | 6  | 0 | -4.588473 | 0.783147  | 1.838542  | 145 | 1 | 0 | -1.860539 | 1.164100  | -2.335331 |
| 89  | 6  | 0 | -4.731532 | 1.246993  | -0.493765 | 146 | 1 | 0 | -3.500753 | 1.070685  | -3.023022 |
| 90  | 6  | 0 | -5.229617 | 0.577760  | 0.622047  | 147 | 6 | 0 | -4.298128 | 3.655005  | -2.291106 |
| 91  | 1  | 0 | -4.950005 | 0.269242  | 2.725787  | 148 | 1 | 0 | -5.161551 | 3.051160  | -2.590737 |
| 92  | 1  | 0 | -5.222153 | 1.092040  | -1.454783 | 149 | 1 | 0 | -4.641083 | 4.393984  | -1.560525 |
| 93  | 6  | 0 | 4.102550  | 0.106421  | -0.758019 | 150 | 1 | 0 | -3.940872 | 4.187821  | -3.178648 |
| 94  | 6  | 0 | 3.950842  | -1.033322 | -1.572553 | 151 | 6 | 0 | -6.449049 | -0.313709 | 0.483869  |
| 95  | 6  | 0 | 4.831566  | 0.019301  | 0.448347  | 152 | 1 | 0 | -6.396691 | -0.776213 | -0.511740 |
| 96  | 6  | 0 | 4.523865  | -2.237598 | -1.152488 | 153 | 6 | 0 | -6.495559 | -1.438518 | 1.518250  |
| 97  | 6  | 0 | 5.405509  | -1.200623 | 0.808539  | 154 | 1 | 0 | -6.721581 | -1.048150 | 2.516878  |
| 98  | 6  | 0 | 5.269449  | -2.342093 | 0.017829  | 155 | 1 | 0 | -7.280270 | -2.157788 | 1.262684  |
| 99  | 1  | 0 | 4.420807  | -3.118328 | -1.783893 | 156 | 1 | 0 | -5.540637 | -1.971743 | 1.567316  |
| 100 | 1  | 0 | 5.984403  | -1.257994 | 1.729942  | 157 | 6 | 0 | -7.730337 | 0.529245  | 0.543487  |
| 101 | 6  | 0 | 5.058509  | 1.225963  | 1.348817  | 158 | 1 | 0 | -8.618006 | -0.097755 | 0.406397  |
| 102 | 1  | 0 | 4.551572  | 2.087808  | 0.908308  | 159 | 1 | 0 | -7.808137 | 1.026197  | 1.516812  |
| 103 | 6  | 0 | 6.549899  | 1.571253  | 1.436232  | 160 | 1 | 0 | -7.730167 | 1.303795  | -0.229269 |
| 104 | 1  | 0 | 6.701280  | 2.467049  | 2.047781  |     |   |   |           |           |           |
| 105 | 1  | 0 | 7.120836  | 0.753974  | 1.890750  |     |   |   |           |           |           |
| 106 | 1  | 0 | 6.964997  | 1.758688  | 0.441186  |     |   |   |           |           |           |
| 107 | 6  | 0 | 4.458756  | 1.011845  | 2.742172  |     |   |   |           |           |           |
| 108 | 1  | 0 | 3.389398  | 0.785329  | 2.675517  |     |   |   |           |           |           |
| 109 | 1  | 0 | 4.965915  | 0.191891  | 3.265371  |     |   |   |           |           |           |
| 110 | 1  | 0 | 4.578262  | 1.914012  | 3.351683  |     |   |   |           |           |           |
| 111 | 6  | 0 | 3.291407  | -0.978464 | -2.945503 |     |   |   |           |           |           |
| 112 | 1  | 0 | 2.809851  | -0.002935 | -3.053125 |     |   |   |           |           |           |
| 113 | 6  | 0 | 4.355956  | -1.128408 | -4.042861 |     |   |   |           |           |           |
| 114 | 1  | 0 | 4.811021  | -2.124860 | -4.002847 |     |   |   |           |           |           |
| 115 | 1  | 0 | 3.903338  | -1.005014 | -5.032324 |     |   |   |           |           |           |
| 116 | 1  | 0 | 5.160929  | -0.394882 | -3.939994 |     |   |   |           |           |           |
| 117 | 6  | 0 | 2.199811  | -2.033567 | -3.133449 |     |   |   |           |           |           |
| 118 | 1  | 0 | 1.367441  | -1.839892 | -2.459819 |     |   |   |           |           |           |
| 119 | 1  | 0 | 1.815424  | -1.993361 | -4.159046 |     |   |   |           |           |           |
| 120 | 1  | 0 | 2.572993  | -3.050079 | -2.960764 |     |   |   |           |           |           |

  

|                                                            |        |        |                         |           |          |  |  |  |  |  |  |
|------------------------------------------------------------|--------|--------|-------------------------|-----------|----------|--|--|--|--|--|--|
| -----                                                      |        |        |                         |           |          |  |  |  |  |  |  |
| <b>S_exo2</b>                                              |        |        |                         |           |          |  |  |  |  |  |  |
| M06-2X/6-31g(d) in gas phase                               |        |        |                         |           |          |  |  |  |  |  |  |
| SCF Done: E(RM062X) = -3617.182891 hartree                 |        |        |                         |           |          |  |  |  |  |  |  |
| Sum of electronic and thermal Free Energies = -3615.909697 |        |        |                         |           |          |  |  |  |  |  |  |
| hartree                                                    |        |        |                         |           |          |  |  |  |  |  |  |
| The number of imaginary frequency = 1                      |        |        |                         |           |          |  |  |  |  |  |  |
| Imaginary frequency = -424.53                              |        |        |                         |           |          |  |  |  |  |  |  |
| -----                                                      |        |        |                         |           |          |  |  |  |  |  |  |
| Center                                                     | Atomic | Atomic | Coordinates (Angstroms) |           |          |  |  |  |  |  |  |
| Number                                                     | Number | Type   | X                       | Y         | Z        |  |  |  |  |  |  |
| -----                                                      |        |        |                         |           |          |  |  |  |  |  |  |
| 1                                                          | 6      | 0      | 2.117482                | -0.366116 | 5.201706 |  |  |  |  |  |  |
| 2                                                          | 1      | 0      | 2.746862                | -1.177214 | 4.847874 |  |  |  |  |  |  |
| 3                                                          | 1      | 0      | 2.161175                | -0.200603 | 6.273953 |  |  |  |  |  |  |
| 4                                                          | 6      | 0      | 1.834692                | 0.707261  | 4.370448 |  |  |  |  |  |  |

|    |   |   |           |           |           |     |    |   |           |           |           |
|----|---|---|-----------|-----------|-----------|-----|----|---|-----------|-----------|-----------|
| 5  | 1 | 0 | 1.450582  | 1.617774  | 4.826213  | 62  | 6  | 0 | -4.920872 | 4.467483  | 1.428158  |
| 6  | 6 | 0 | 1.796713  | 0.639420  | 2.964049  | 63  | 1  | 0 | -3.397668 | 5.995678  | 0.907510  |
| 7  | 1 | 0 | 1.370744  | 1.454165  | 2.385556  | 64  | 1  | 0 | -2.805404 | 4.656828  | 1.910499  |
| 8  | 6 | 0 | 2.222815  | -0.481019 | 2.296351  | 65  | 6  | 0 | -4.934209 | 3.031281  | 0.948079  |
| 9  | 1 | 0 | 2.752491  | -1.281657 | 2.803339  | 66  | 1  | 0 | -5.146603 | 4.543704  | 2.496202  |
| 10 | 1 | 0 | 1.566940  | -0.059579 | 0.341741  | 67  | 1  | 0 | -5.666206 | 5.075030  | 0.900085  |
| 11 | 7 | 0 | 2.132457  | -0.671147 | 0.960415  | 68  | 6  | 0 | -0.257855 | 5.588009  | -1.979574 |
| 12 | 6 | 0 | 2.737510  | -1.776580 | 0.392841  | 69  | 6  | 0 | 0.847827  | 4.845319  | -1.582421 |
| 13 | 8 | 0 | 2.601444  | -1.749638 | -0.931116 | 70  | 6  | 0 | 0.730628  | 3.743173  | -0.728785 |
| 14 | 8 | 0 | 3.310322  | -2.640571 | 1.025857  | 71  | 6  | 0 | -0.532028 | 3.441725  | -0.189429 |
| 15 | 6 | 0 | 3.314918  | -2.772187 | -1.651817 | 72  | 1  | 0 | -0.149436 | 6.413850  | -2.676947 |
| 16 | 1 | 0 | 3.185199  | -3.723562 | -1.131013 | 73  | 1  | 0 | 1.837048  | 5.101364  | -1.950516 |
| 17 | 1 | 0 | 2.808126  | -2.811028 | -2.618128 | 74  | 6  | 0 | -3.501903 | 1.463938  | -0.188093 |
| 18 | 6 | 0 | 4.771859  | -2.409920 | -1.806099 | 75  | 6  | 0 | -4.427594 | 0.431884  | 0.021687  |
| 19 | 6 | 0 | 5.192248  | -1.653398 | -2.902842 | 76  | 6  | 0 | -5.632569 | 0.759940  | 0.655182  |
| 20 | 6 | 0 | 5.711727  | -2.793393 | -0.844673 | 77  | 6  | 0 | -5.876114 | 2.034999  | 1.162732  |
| 21 | 6 | 0 | 6.523152  | -1.264545 | -3.029430 | 78  | 1  | 0 | -6.369853 | -0.025493 | 0.796256  |
| 22 | 1 | 0 | 4.468862  | -1.366567 | -3.662410 | 79  | 1  | 0 | -6.787535 | 2.238155  | 1.718010  |
| 23 | 6 | 0 | 7.044596  | -2.409892 | -0.972973 | 80  | 8  | 0 | -0.679104 | 2.426991  | 0.743347  |
| 24 | 1 | 0 | 5.386496  | -3.375673 | 0.011240  | 81  | 8  | 0 | 0.079196  | 0.364547  | -0.629772 |
| 25 | 6 | 0 | 7.451568  | -1.640847 | -2.061109 | 82  | 8  | 0 | -1.453449 | 0.119804  | 1.436397  |
| 26 | 1 | 0 | 6.834701  | -0.671275 | -3.883404 | 83  | 15 | 0 | -1.022564 | 0.901473  | 0.227636  |
| 27 | 1 | 0 | 7.766041  | -2.710088 | -0.218934 | 84  | 8  | 0 | -2.286925 | 1.179990  | -0.779297 |
| 28 | 1 | 0 | 8.489895  | -1.338030 | -2.156599 | 85  | 6  | 0 | -4.130604 | -0.977878 | -0.374842 |
| 29 | 1 | 0 | -0.719887 | -1.455149 | 1.325243  | 86  | 6  | 0 | -4.166816 | -2.001991 | 0.597453  |
| 30 | 6 | 0 | 0.423129  | -4.929206 | -1.721577 | 87  | 6  | 0 | -3.843078 | -1.309642 | -1.719405 |
| 31 | 6 | 0 | 0.865319  | -5.285434 | -0.464277 | 88  | 6  | 0 | -3.921977 | -3.322074 | 0.208427  |
| 32 | 6 | 0 | 0.649718  | -4.428897 | 0.634020  | 89  | 6  | 0 | -3.621429 | -2.645288 | -2.053491 |
| 33 | 6 | 0 | -0.036126 | -3.213180 | 0.423463  | 90  | 6  | 0 | -3.650753 | -3.669131 | -1.110143 |
| 34 | 6 | 0 | -0.487650 | -2.848914 | -0.857513 | 91  | 1  | 0 | -3.947130 | -4.098690 | 0.968727  |
| 35 | 6 | 0 | -0.249762 | -3.705094 | -1.911909 | 92  | 1  | 0 | -3.407623 | -2.901370 | -3.091127 |
| 36 | 1 | 0 | 1.618832  | -5.650759 | 2.145858  | 93  | 6  | 0 | 1.958808  | 2.937632  | -0.445030 |
| 37 | 1 | 0 | 0.592497  | -5.589362 | -2.566134 | 94  | 6  | 0 | 2.405224  | 1.993395  | -1.397281 |
| 38 | 1 | 0 | 1.386397  | -6.225030 | -0.301693 | 95  | 6  | 0 | 2.720678  | 3.203129  | 0.705797  |
| 39 | 6 | 0 | 1.098133  | -4.714526 | 1.963852  | 96  | 6  | 0 | 3.590604  | 1.306977  | -1.141606 |
| 40 | 1 | 0 | -0.992465 | -1.897224 | -1.000031 | 97  | 6  | 0 | 3.885684  | 2.462459  | 0.933147  |
| 41 | 1 | 0 | -0.595531 | -3.425024 | -2.902973 | 98  | 6  | 0 | 4.334133  | 1.508381  | 0.022348  |
| 42 | 6 | 0 | 0.221918  | -2.590802 | 2.739240  | 99  | 1  | 0 | 3.952783  | 0.578937  | -1.863666 |
| 43 | 6 | 0 | 0.899977  | -3.833824 | 2.976857  | 100 | 1  | 0 | 4.471232  | 2.663134  | 1.829871  |
| 44 | 1 | 0 | 1.249381  | -4.049505 | 3.979285  | 101 | 6  | 0 | 2.382605  | 4.368129  | 1.630547  |
| 45 | 7 | 0 | -0.227037 | -2.365577 | 1.487218  | 102 | 1  | 0 | 1.463362  | 4.834488  | 1.264650  |
| 46 | 6 | 0 | -0.031279 | -1.589694 | 3.710949  | 103 | 6  | 0 | 3.493774  | 5.424325  | 1.547645  |
| 47 | 1 | 0 | -0.603189 | -0.737912 | 3.353318  | 104 | 1  | 0 | 3.226871  | 6.310896  | 2.132561  |
| 48 | 6 | 0 | 0.402060  | -1.584300 | 5.028850  | 105 | 1  | 0 | 4.439196  | 5.032597  | 1.939158  |
| 49 | 1 | 0 | 0.866087  | -2.465385 | 5.465555  | 106 | 1  | 0 | 3.662769  | 5.731468  | 0.510943  |
| 50 | 1 | 0 | -0.153451 | -0.979485 | 5.735957  | 107 | 6  | 0 | 2.135176  | 3.960605  | 3.086204  |
| 51 | 6 | 0 | -2.848730 | 5.804760  | -1.862076 | 108 | 1  | 0 | 1.199977  | 3.400207  | 3.180681  |
| 52 | 6 | 0 | -1.503934 | 5.227589  | -1.492573 | 109 | 1  | 0 | 2.951190  | 3.342437  | 3.478406  |
| 53 | 6 | 0 | -1.648732 | 4.184680  | -0.569007 | 110 | 1  | 0 | 2.053976  | 4.852211  | 3.717328  |
| 54 | 6 | 0 | -3.797015 | 4.686386  | -1.411721 | 111 | 6  | 0 | 1.684436  | 1.781520  | -2.724155 |
| 55 | 1 | 0 | -3.043840 | 6.737169  | -1.316544 | 112 | 1  | 0 | 0.644184  | 2.096649  | -2.594600 |
| 56 | 1 | 0 | -2.927733 | 6.031227  | -2.929447 | 113 | 6  | 0 | 2.335055  | 2.648673  | -3.813346 |
| 57 | 1 | 0 | -3.847352 | 3.913617  | -2.187189 | 114 | 1  | 0 | 3.383102  | 2.356788  | -3.950775 |
| 58 | 1 | 0 | -4.816192 | 5.024254  | -1.203077 | 115 | 1  | 0 | 1.817069  | 2.514082  | -4.769260 |
| 59 | 6 | 0 | -3.107567 | 4.074037  | -0.154306 | 116 | 1  | 0 | 2.313615  | 3.711822  | -3.562714 |
| 60 | 6 | 0 | -3.483091 | 4.920172  | 1.091336  | 117 | 6  | 0 | 1.658594  | 0.324790  | -3.198424 |
| 61 | 6 | 0 | -3.787845 | 2.765897  | 0.194444  | 118 | 1  | 0 | 1.232315  | -0.328414 | -2.436811 |

|     |   |   |           |           |           |    |   |   |           |           |           |
|-----|---|---|-----------|-----------|-----------|----|---|---|-----------|-----------|-----------|
| 119 | 1 | 0 | 1.051358  | 0.254684  | -4.108241 | 3  | 1 | 0 | -0.362994 | -3.634044 | -5.445401 |
| 120 | 1 | 0 | 2.665189  | -0.029018 | -3.453697 | 4  | 6 | 0 | -0.027751 | -4.307029 | -3.450755 |
| 121 | 6 | 0 | 5.633290  | 0.751657  | 0.230468  | 5  | 1 | 0 | -0.444638 | -5.286913 | -3.677710 |
| 122 | 1 | 0 | 5.713476  | 0.018696  | -0.581575 | 6  | 6 | 0 | 0.341897  | -4.079186 | -2.106489 |
| 123 | 6 | 0 | 6.834100  | 1.698643  | 0.118884  | 7  | 1 | 0 | 0.201331  | -4.865109 | -1.375634 |
| 124 | 1 | 0 | 6.823834  | 2.438821  | 0.927444  | 8  | 6 | 0 | 0.748921  | -2.831239 | -1.693224 |
| 125 | 1 | 0 | 7.773017  | 1.137506  | 0.183712  | 9  | 1 | 0 | 0.974925  | -2.053265 | -2.410425 |
| 126 | 1 | 0 | 6.818459  | 2.239080  | -0.832327 | 10 | 1 | 0 | 1.288544  | -1.418801 | -0.367710 |
| 127 | 6 | 0 | 5.672390  | -0.015873 | 1.555357  | 11 | 7 | 0 | 0.972389  | -2.390110 | -0.426595 |
| 128 | 1 | 0 | 6.652299  | -0.488234 | 1.688842  | 12 | 6 | 0 | 0.703454  | -3.064789 | 0.740985  |
| 129 | 1 | 0 | 5.500751  | 0.651508  | 2.408146  | 13 | 8 | 0 | 0.952337  | -2.257150 | 1.782275  |
| 130 | 1 | 0 | 4.919459  | -0.809217 | 1.582515  | 14 | 8 | 0 | 0.290982  | -4.202124 | 0.819055  |
| 131 | 6 | 0 | -4.478827 | -1.756420 | 2.069428  | 15 | 6 | 0 | 0.777595  | -2.823038 | 3.079805  |
| 132 | 1 | 0 | -4.550784 | -0.680403 | 2.236937  | 16 | 1 | 0 | -0.027138 | -3.563560 | 3.042666  |
| 133 | 6 | 0 | -3.356383 | -2.255219 | 2.981450  | 17 | 1 | 0 | 1.704652  | -3.342322 | 3.355310  |
| 134 | 1 | 0 | -2.444030 | -1.704166 | 2.757239  | 18 | 6 | 0 | 0.460192  | -1.721334 | 4.060696  |
| 135 | 1 | 0 | -3.613987 | -2.079000 | 4.031740  | 19 | 6 | 0 | 0.311538  | -2.056335 | 5.408340  |
| 136 | 1 | 0 | -3.162982 | -3.327223 | 2.859180  | 20 | 6 | 0 | 0.296100  | -0.394959 | 3.658578  |
| 137 | 6 | 0 | -5.817731 | -2.398690 | 2.455334  | 21 | 6 | 0 | -0.012467 | -1.080953 | 6.345818  |
| 138 | 1 | 0 | -6.069999 | -2.164507 | 3.495066  | 22 | 1 | 0 | 0.445106  | -3.089155 | 5.724374  |
| 139 | 1 | 0 | -6.635401 | -2.050639 | 1.816041  | 23 | 6 | 0 | -0.031039 | 0.579155  | 4.601279  |
| 140 | 1 | 0 | -5.768365 | -3.489325 | 2.359359  | 24 | 1 | 0 | 0.405660  | -0.121282 | 2.612004  |
| 141 | 6 | 0 | -3.786513 | -0.288513 | -2.847578 | 25 | 6 | 0 | -0.188336 | 0.242004  | 5.942565  |
| 142 | 1 | 0 | -3.979833 | 0.704145  | -2.435932 | 26 | 1 | 0 | -0.127368 | -1.353161 | 7.390720  |
| 143 | 6 | 0 | -2.397187 | -0.260981 | -3.499712 | 27 | 1 | 0 | -0.164330 | 1.605902  | 4.273163  |
| 144 | 1 | 0 | -2.347748 | 0.532270  | -4.253910 | 28 | 1 | 0 | -0.443746 | 1.004104  | 6.672392  |
| 145 | 1 | 0 | -1.615584 | -0.075462 | -2.756558 | 29 | 1 | 0 | -1.591941 | -0.994956 | -0.101293 |
| 146 | 1 | 0 | -2.184803 | -1.210205 | -4.007424 | 30 | 6 | 0 | -3.217144 | -3.945122 | 3.193129  |
| 147 | 6 | 0 | -4.877002 | -0.564479 | -3.891134 | 31 | 6 | 0 | -3.402446 | -4.540531 | 1.963162  |
| 148 | 1 | 0 | -4.729986 | -1.536907 | -4.373834 | 32 | 6 | 0 | -3.003589 | -3.881298 | 0.784028  |
| 149 | 1 | 0 | -5.870462 | -0.563845 | -3.432212 | 33 | 6 | 0 | -2.413415 | -2.604925 | 0.889966  |
| 150 | 1 | 0 | -4.857690 | 0.202155  | -4.673018 | 34 | 6 | 0 | -2.205275 | -2.009723 | 2.141826  |
| 151 | 6 | 0 | -3.418325 | -5.103529 | -1.544804 | 35 | 6 | 0 | -2.615620 | -2.673914 | 3.278622  |
| 152 | 1 | 0 | -2.716569 | -5.071743 | -2.390059 | 36 | 1 | 0 | -3.640931 | -5.395424 | -0.637106 |
| 153 | 6 | 0 | -2.791599 | -5.971632 | -0.453218 | 37 | 1 | 0 | -3.529858 | -4.456539 | 4.097393  |
| 154 | 1 | 0 | -3.510061 | -6.181390 | 0.347084  | 38 | 1 | 0 | -3.857906 | -5.523595 | 1.883860  |
| 155 | 1 | 0 | -2.473971 | -6.933662 | -0.868143 | 39 | 6 | 0 | -3.176450 | -4.419039 | -0.527722 |
| 156 | 1 | 0 | -1.918851 | -5.481918 | -0.009358 | 40 | 1 | 0 | -1.711246 | -1.046223 | 2.179210  |
| 157 | 6 | 0 | -4.729567 | -5.724941 | -2.044681 | 41 | 1 | 0 | -2.449928 | -2.209505 | 4.247197  |
| 158 | 1 | 0 | -4.567965 | -6.749009 | -2.398428 | 42 | 6 | 0 | -2.133055 | -2.443383 | -1.489436 |
| 159 | 1 | 0 | -5.464755 | -5.754434 | -1.232832 | 43 | 6 | 0 | -2.765760 | -3.727150 | -1.621461 |
| 160 | 1 | 0 | -5.157486 | -5.138344 | -2.863145 | 44 | 1 | 0 | -2.881162 | -4.143970 | -2.613903 |

**S\_endo**

M06-2X/6-31g(d) in gas phase

SCF Done: E(RM062X) = -3617.188305 hartree

Sum of electronic and thermal Free Energies = -3615.911780 hartree

The number of imaginary frequency = 1

Imaginary frequency = -376.87

| Center Number | Atomic Number | Atomic Type | Coordinates (Angstroms) |           |           |
|---------------|---------------|-------------|-------------------------|-----------|-----------|
|               |               |             | X                       | Y         | Z         |
| 1             | 6             | 0           | -0.079575               | -3.339823 | -4.439106 |
| 2             | 1             | 0           | 0.566866                | -2.469780 | -4.387225 |

|    |   |   |           |           |           |
|----|---|---|-----------|-----------|-----------|
| 45 | 7 | 0 | -2.017922 | -1.938742 | -0.246849 |
| 46 | 6 | 0 | -1.622068 | -1.698710 | -2.588946 |
| 47 | 1 | 0 | -1.095505 | -0.774728 | -2.358485 |
| 48 | 6 | 0 | -1.740954 | -2.120597 | -3.902922 |
| 49 | 1 | 0 | -2.483375 | -2.859661 | -4.184815 |
| 50 | 1 | 0 | -1.506436 | -1.403789 | -4.684008 |
| 51 | 6 | 0 | 0.461302  | 6.182116  | 1.802597  |
| 52 | 6 | 0 | -0.619723 | 5.378004  | 1.113691  |
| 53 | 6 | 0 | -0.048688 | 4.392798  | 0.300763  |
| 54 | 6 | 0 | 1.721324  | 5.335916  | 1.530944  |
| 55 | 1 | 0 | 0.553153  | 7.187080  | 1.372321  |
| 56 | 1 | 0 | 0.259347  | 6.309689  | 2.870496  |
| 57 | 1 | 0 | 1.814864  | 4.549749  | 2.288244  |
| 58 | 1 | 0 | 2.647348  | 5.918606  | 1.528189  |
| 59 | 6 | 0 | 1.435009  | 4.668133  | 0.157568  |

|     |    |   |           |           |           |     |   |   |           |           |           |
|-----|----|---|-----------|-----------|-----------|-----|---|---|-----------|-----------|-----------|
| 60  | 6  | 0 | 1.673374  | 5.714710  | -0.970398 | 117 | 6 | 0 | -1.469900 | 1.832699  | -3.871671 |
| 61  | 6  | 0 | 2.474422  | 3.623769  | -0.222186 | 118 | 1 | 0 | -0.977677 | 2.447338  | -4.633187 |
| 62  | 6  | 0 | 3.193421  | 5.699625  | -1.182587 | 119 | 1 | 0 | -0.695958 | 1.377808  | -3.246193 |
| 63  | 1  | 0 | 1.270306  | 6.699436  | -0.717079 | 120 | 1 | 0 | -2.017441 | 1.039765  | -4.396114 |
| 64  | 1  | 0 | 1.169880  | 5.363370  | -1.877934 | 121 | 6 | 0 | -5.360565 | -1.162297 | -1.816827 |
| 65  | 6  | 0 | 3.525491  | 4.254364  | -0.899134 | 122 | 1 | 0 | -4.688857 | -1.758354 | -2.453628 |
| 66  | 1  | 0 | 3.488959  | 6.001972  | -2.191655 | 123 | 6 | 0 | -6.542220 | -0.707066 | -2.685629 |
| 67  | 1  | 0 | 3.702191  | 6.372886  | -0.480846 | 124 | 1 | 0 | -7.098886 | -1.568940 | -3.069411 |
| 68  | 6  | 0 | -1.998066 | 5.503520  | 1.204777  | 125 | 1 | 0 | -7.227637 | -0.092503 | -2.091902 |
| 69  | 6  | 0 | -2.799429 | 4.569092  | 0.552230  | 126 | 1 | 0 | -6.206479 | -0.106801 | -3.536126 |
| 70  | 6  | 0 | -2.253623 | 3.475735  | -0.129770 | 127 | 6 | 0 | -5.859751 | -2.056603 | -0.684009 |
| 71  | 6  | 0 | -0.856838 | 3.424232  | -0.277368 | 128 | 1 | 0 | -6.646936 | -1.554942 | -0.109610 |
| 72  | 1  | 0 | -2.448765 | 6.298698  | 1.792031  | 129 | 1 | 0 | -6.283832 | -2.981360 | -1.088511 |
| 73  | 1  | 0 | -3.881615 | 4.641204  | 0.625079  | 130 | 1 | 0 | -5.056790 | -2.323028 | 0.009775  |
| 74  | 6  | 0 | 2.520906  | 2.245813  | -0.008134 | 131 | 6 | 0 | 3.725089  | -0.089752 | -2.932616 |
| 75  | 6  | 0 | 3.636226  | 1.502908  | -0.429103 | 132 | 1 | 0 | 3.451313  | 0.960153  | -2.808402 |
| 76  | 6  | 0 | 4.708951  | 2.189481  | -1.012668 | 133 | 6 | 0 | 2.656732  | -0.713499 | -3.838334 |
| 77  | 6  | 0 | 4.662548  | 3.553333  | -1.268320 | 134 | 1 | 0 | 2.728779  | -0.285179 | -4.844354 |
| 78  | 1  | 0 | 5.582827  | 1.612762  | -1.302040 | 135 | 1 | 0 | 2.788846  | -1.798869 | -3.934144 |
| 79  | 1  | 0 | 5.485974  | 4.050676  | -1.772951 | 136 | 1 | 0 | 1.661899  | -0.492476 | -3.442488 |
| 80  | 8  | 0 | -0.282560 | 2.427277  | -1.037070 | 137 | 6 | 0 | 5.092412  | -0.160659 | -3.629881 |
| 81  | 8  | 0 | -0.773602 | 0.443909  | 0.585860  | 138 | 1 | 0 | 5.065425  | 0.378114  | -4.582940 |
| 82  | 8  | 0 | 0.808765  | 0.218078  | -1.457911 | 139 | 1 | 0 | 5.888591  | 0.269040  | -3.015395 |
| 83  | 15 | 0 | 0.246695  | 1.042340  | -0.341499 | 140 | 1 | 0 | 5.364929  | -1.201533 | -3.839381 |
| 84  | 8  | 0 | 1.456437  | 1.616458  | 0.616538  | 141 | 6 | 0 | 3.955391  | 0.166716  | 2.189498  |
| 85  | 6  | 0 | 3.742463  | 0.011542  | -0.349012 | 142 | 1 | 0 | 3.137115  | 0.895217  | 2.160843  |
| 86  | 6  | 0 | 3.810618  | -0.733606 | -1.550508 | 143 | 6 | 0 | 3.769255  | -0.687837 | 3.443849  |
| 87  | 6  | 0 | 3.908298  | -0.634084 | 0.892670  | 144 | 1 | 0 | 3.602532  | -0.044759 | 4.313426  |
| 88  | 6  | 0 | 4.052569  | -2.106062 | -1.477439 | 145 | 1 | 0 | 2.908524  | -1.351447 | 3.351015  |
| 89  | 6  | 0 | 4.135502  | -2.013977 | 0.907787  | 146 | 1 | 0 | 4.658044  | -1.297127 | 3.645805  |
| 90  | 6  | 0 | 4.226485  | -2.764781 | -0.260999 | 147 | 6 | 0 | 5.287566  | 0.925406  | 2.305894  |
| 91  | 1  | 0 | 4.122237  | -2.676812 | -2.402718 | 148 | 1 | 0 | 6.120553  | 0.213020  | 2.312035  |
| 92  | 1  | 0 | 4.275406  | -2.521370 | 1.858601  | 149 | 1 | 0 | 5.440196  | 1.623826  | 1.480410  |
| 93  | 6  | 0 | -3.104818 | 2.335188  | -0.577415 | 150 | 1 | 0 | 5.318847  | 1.491608  | 3.243125  |
| 94  | 6  | 0 | -3.865389 | 1.627508  | 0.378345  | 151 | 6 | 0 | 4.544791  | -4.247627 | -0.210514 |
| 95  | 6  | 0 | -3.101992 | 1.909845  | -1.923481 | 152 | 1 | 0 | 4.668216  | -4.518441 | 0.846319  |
| 96  | 6  | 0 | -4.571993 | 0.489460  | -0.024841 | 153 | 6 | 0 | 3.407062  | -5.097017 | -0.785150 |
| 97  | 6  | 0 | -3.827914 | 0.773988  | -2.272346 | 154 | 1 | 0 | 3.215373  | -4.836177 | -1.832313 |
| 98  | 6  | 0 | -4.564921 | 0.041459  | -1.341936 | 155 | 1 | 0 | 3.664226  | -6.161247 | -0.744903 |
| 99  | 1  | 0 | -5.140532 | -0.057058 | 0.723694  | 156 | 1 | 0 | 2.476879  | -4.949290 | -0.227921 |
| 100 | 1  | 0 | -3.826574 | 0.443073  | -3.310405 | 157 | 6 | 0 | 5.864489  | -4.550871 | -0.929874 |
| 101 | 6  | 0 | -3.983327 | 2.040800  | 1.842905  | 158 | 1 | 0 | 6.122505  | -5.610686 | -0.832912 |
| 102 | 1  | 0 | -3.375762 | 2.928835  | 2.010119  | 159 | 1 | 0 | 5.785467  | -4.322241 | -1.998461 |
| 103 | 6  | 0 | -3.436656 | 0.977985  | 2.795811  | 160 | 1 | 0 | 6.684209  | -3.954409 | -0.518946 |
| 104 | 1  | 0 | -3.539571 | 1.310936  | 3.835106  |     |   |   |           |           |           |
| 105 | 1  | 0 | -3.966799 | 0.024743  | 2.694085  |     |   |   |           |           |           |
| 106 | 1  | 0 | -2.375938 | 0.814779  | 2.587663  |     |   |   |           |           |           |
| 107 | 6  | 0 | -5.433679 | 2.402924  | 2.186686  |     |   |   |           |           |           |
| 108 | 1  | 0 | -5.503462 | 2.763658  | 3.218461  |     |   |   |           |           |           |
| 109 | 1  | 0 | -5.818416 | 3.183147  | 1.521336  |     |   |   |           |           |           |
| 110 | 1  | 0 | -6.093066 | 1.533096  | 2.091577  |     |   |   |           |           |           |
| 111 | 6  | 0 | -2.420590 | 2.695843  | -3.035362 |     |   |   |           |           |           |
| 112 | 1  | 0 | -1.829612 | 3.496775  | -2.585017 |     |   |   |           |           |           |
| 113 | 6  | 0 | -3.482658 | 3.355061  | -3.926653 |     |   |   |           |           |           |
| 114 | 1  | 0 | -3.008819 | 3.964191  | -4.703941 |     |   |   |           |           |           |
| 115 | 1  | 0 | -4.102661 | 2.598353  | -4.420903 |     |   |   |           |           |           |
| 116 | 1  | 0 | -4.144279 | 3.998596  | -3.338530 |     |   |   |           |           |           |

-----  
**S\_endo2 [TSs(H)]**

B3LYP/6-31g(d) in gas phase

SCF Done: E(RB3LYP) = -3618.572093 hartree

Sum of electronic and thermal Free Energies = -3617.324162 hartree

The number of imaginary frequency = 1

Imaginary frequency = -355.84

-----  
Center    Atomic    Atomic            Coordinates (Angstroms)  
Number    Number    Type            X       Y       Z  
-----

|    |   |   |           |           |           |     |    |   |           |           |           |
|----|---|---|-----------|-----------|-----------|-----|----|---|-----------|-----------|-----------|
| 1  | 6 | 0 | 0.071298  | -2.489566 | 4.440860  | 58  | 1  | 0 | 1.819647  | 5.840492  | -2.816150 |
| 2  | 1 | 0 | 0.235909  | -1.443423 | 4.204004  | 59  | 6  | 0 | 2.275423  | 4.268689  | -1.307139 |
| 3  | 1 | 0 | 0.563759  | -2.827782 | 5.348919  | 60  | 6  | 0 | 3.162314  | 5.302578  | -0.527081 |
| 4  | 6 | 0 | -1.099820 | -3.122996 | 4.046204  | 61  | 6  | 0 | 0.996519  | 4.341395  | -0.479279 |
| 5  | 1 | 0 | -1.358399 | -4.054510 | 4.549000  | 62  | 6  | 0 | 2.177007  | 6.394791  | -0.071892 |
| 6  | 6 | 0 | -1.895589 | -2.785287 | 2.927147  | 63  | 1  | 0 | 3.991767  | 5.683390  | -1.130396 |
| 7  | 1 | 0 | -2.694828 | -3.454189 | 2.637308  | 64  | 1  | 0 | 3.590400  | 4.802750  | 0.349555  |
| 8  | 6 | 0 | -1.613518 | -1.692948 | 2.135674  | 65  | 6  | 0 | 0.903179  | 5.605690  | 0.125732  |
| 9  | 1 | 0 | -0.878951 | -0.952072 | 2.422729  | 66  | 1  | 0 | 2.499917  | 6.906517  | 0.842271  |
| 10 | 1 | 0 | -1.865907 | -0.477314 | 0.538059  | 67  | 1  | 0 | 2.055258  | 7.170806  | -0.841247 |
| 11 | 7 | 0 | -2.191389 | -1.352709 | 0.942201  | 68  | 6  | 0 | 4.940718  | 2.366428  | -3.002530 |
| 12 | 6 | 0 | -3.061922 | -2.130166 | 0.193966  | 69  | 6  | 0 | 5.185364  | 1.287889  | -2.154106 |
| 13 | 8 | 0 | -3.301444 | -1.530975 | -0.986818 | 70  | 6  | 0 | 4.328619  | 0.961837  | -1.087815 |
| 14 | 8 | 0 | -3.518711 | -3.202516 | 0.548289  | 71  | 6  | 0 | 3.242961  | 1.829492  | -0.832025 |
| 15 | 6 | 0 | -4.122962 | -2.275526 | -1.934292 | 72  | 1  | 0 | 5.581689  | 2.543996  | -3.862831 |
| 16 | 1 | 0 | -3.728111 | -1.972334 | -2.904713 | 73  | 1  | 0 | 6.044301  | 0.649423  | -2.336932 |
| 17 | 1 | 0 | -3.933465 | -3.339226 | -1.781877 | 74  | 6  | 0 | -0.028820 | 3.409860  | -0.296827 |
| 18 | 6 | 0 | -5.592471 | -1.953410 | -1.821771 | 75  | 6  | 0 | -1.192395 | 3.760931  | 0.422815  |
| 19 | 6 | 0 | -6.170757 | -0.998339 | -2.667712 | 76  | 6  | 0 | -1.284422 | 5.069105  | 0.927955  |
| 20 | 6 | 0 | -6.404655 | -2.617498 | -0.891174 | 77  | 6  | 0 | -0.243896 | 5.986388  | 0.809555  |
| 21 | 6 | 0 | -7.531933 | -0.701284 | -2.582179 | 78  | 1  | 0 | -2.191273 | 5.350338  | 1.455325  |
| 22 | 1 | 0 | -5.551394 | -0.488235 | -3.401880 | 79  | 1  | 0 | -0.327234 | 6.974487  | 1.255638  |
| 23 | 6 | 0 | -7.765298 | -2.321800 | -0.804991 | 80  | 8  | 0 | 2.354472  | 1.541282  | 0.193397  |
| 24 | 1 | 0 | -5.959749 | -3.357676 | -0.233396 | 81  | 8  | 0 | 0.935893  | -0.192234 | -1.167135 |
| 25 | 6 | 0 | -8.331560 | -1.362838 | -1.648684 | 82  | 8  | 0 | 0.238242  | 0.608839  | 1.211398  |
| 26 | 1 | 0 | -7.966840 | 0.041403  | -3.245578 | 83  | 15 | 0 | 0.855644  | 0.902773  | -0.125170 |
| 27 | 1 | 0 | -8.385594 | -2.843786 | -0.081187 | 84  | 8  | 0 | 0.088546  | 2.159289  | -0.886440 |
| 28 | 1 | 0 | -9.392212 | -1.135696 | -1.581616 | 85  | 6  | 0 | -2.336215 | 2.831511  | 0.701766  |
| 29 | 1 | 0 | 0.555347  | -1.747027 | -0.629925 | 86  | 6  | 0 | -2.642899 | 2.483516  | 2.044620  |
| 30 | 6 | 0 | -1.392882 | -4.680849 | -3.799033 | 87  | 6  | 0 | -3.190578 | 2.402636  | -0.341039 |
| 31 | 6 | 0 | -1.190483 | -5.386797 | -2.626785 | 88  | 6  | 0 | -3.794985 | 1.733525  | 2.303375  |
| 32 | 6 | 0 | -0.623811 | -4.754532 | -1.499243 | 89  | 6  | 0 | -4.325052 | 1.643671  | -0.023050 |
| 33 | 6 | 0 | -0.271634 | -3.383168 | -1.589535 | 90  | 6  | 0 | -4.658520 | 1.308274  | 1.290475  |
| 34 | 6 | 0 | -0.483247 | -2.663876 | -2.783959 | 91  | 1  | 0 | -4.029847 | 1.485675  | 3.335475  |
| 35 | 6 | 0 | -1.034433 | -3.318501 | -3.872126 | 92  | 1  | 0 | -4.987375 | 1.323274  | -0.823875 |
| 36 | 1 | 0 | -0.626238 | -6.469978 | -0.164904 | 93  | 6  | 0 | 4.613731  | -0.272166 | -0.283349 |
| 37 | 1 | 0 | -1.824375 | -5.174145 | -4.664878 | 94  | 6  | 0 | 4.698196  | -1.536620 | -0.927897 |
| 38 | 1 | 0 | -1.460963 | -6.437390 | -2.558373 | 95  | 6  | 0 | 4.893243  | -0.187527 | 1.104725  |
| 39 | 6 | 0 | -0.366590 | -5.418495 | -0.258354 | 96  | 6  | 0 | 5.048896  | -2.664421 | -0.177491 |
| 40 | 1 | 0 | -0.200811 | -1.616380 | -2.822447 | 97  | 6  | 0 | 5.227353  | -1.353407 | 1.804901  |
| 41 | 1 | 0 | -1.189811 | -2.771733 | -4.798049 | 98  | 6  | 0 | 5.318405  | -2.602186 | 1.190412  |
| 42 | 6 | 0 | 0.543408  | -3.367806 | 0.690916  | 99  | 1  | 0 | 5.117369  | -3.622772 | -0.686139 |
| 43 | 6 | 0 | 0.194908  | -4.756883 | 0.792167  | 100 | 1  | 0 | 5.452038  | -1.279694 | 2.867284  |
| 44 | 1 | 0 | 0.385094  | -5.271204 | 1.725646  | 101 | 6  | 0 | 4.431003  | -1.744208 | -2.422008 |
| 45 | 7 | 0 | 0.285633  | -2.757103 | -0.496206 | 102 | 1  | 0 | 4.135627  | -0.787143 | -2.855116 |
| 46 | 6 | 0 | 1.165876  | -2.610061 | 1.720334  | 103 | 6  | 0 | 3.257648  | -2.707259 | -2.668104 |
| 47 | 1 | 0 | 1.378751  | -1.570456 | 1.492390  | 104 | 1  | 0 | 3.077193  | -2.820932 | -3.744249 |
| 48 | 6 | 0 | 1.516358  | -3.089152 | 2.978755  | 105 | 1  | 0 | 3.446349  | -3.705871 | -2.255678 |
| 49 | 1 | 0 | 1.496859  | -4.151911 | 3.197308  | 106 | 1  | 0 | 2.350208  | -2.308547 | -2.211836 |
| 50 | 1 | 0 | 2.274366  | -2.537800 | 3.525822  | 107 | 6  | 0 | 5.694192  | -2.221026 | -3.166177 |
| 51 | 6 | 0 | 3.402962  | 4.432069  | -3.478525 | 108 | 1  | 0 | 5.496097  | -2.303469 | -4.241958 |
| 52 | 6 | 0 | 3.877695  | 3.213442  | -2.714277 | 109 | 1  | 0 | 6.532685  | -1.528886 | -3.028709 |
| 53 | 6 | 0 | 3.089367  | 3.004822  | -1.571536 | 110 | 1  | 0 | 6.021979  | -3.206233 | -2.813131 |
| 54 | 6 | 0 | 2.072290  | 4.776321  | -2.771177 | 111 | 6  | 0 | 4.922979  | 1.132965  | 1.875713  |
| 55 | 1 | 0 | 4.121562  | 5.260642  | -3.409753 | 112 | 1  | 0 | 4.637146  | 1.936140  | 1.194330  |
| 56 | 1 | 0 | 3.270630  | 4.222716  | -4.546764 | 113 | 6  | 0 | 6.349293  | 1.455364  | 2.366572  |
| 57 | 1 | 0 | 1.247958  | 4.215995  | -3.226754 | 114 | 1  | 0 | 6.370038  | 2.433085  | 2.863654  |

|     |   |   |           |           |           | Number | Number | Type | X         | Y         | Z         |
|-----|---|---|-----------|-----------|-----------|--------|--------|------|-----------|-----------|-----------|
| 115 | 1 | 0 | 6.709743  | 0.709792  | 3.085383  |        |        |      |           |           |           |
| 116 | 1 | 0 | 7.058858  | 1.483570  | 1.531840  |        |        |      |           |           |           |
| 117 | 6 | 0 | 3.917006  | 1.149848  | 3.042229  | 1      | 6      | 0    | -0.137308 | -2.322200 | 4.403660  |
| 118 | 1 | 0 | 3.933559  | 2.126194  | 3.542273  | 2      | 1      | 0    | 0.095648  | -1.285940 | 4.179807  |
| 119 | 1 | 0 | 2.899865  | 0.970811  | 2.682657  | 3      | 1      | 0    | 0.308714  | -2.695845 | 5.321724  |
| 120 | 1 | 0 | 4.162847  | 0.392197  | 3.797353  | 4      | 6      | 0    | -1.325725 | -2.889496 | 3.959391  |
| 121 | 6 | 0 | 5.755503  | -3.827858 | 1.982931  | 5      | 1      | 0    | -1.651100 | -3.812041 | 4.438988  |
| 122 | 1 | 0 | 5.709311  | -3.555739 | 3.046926  | 6      | 6      | 0    | -2.045369 | -2.500748 | 2.808615  |
| 123 | 6 | 0 | 7.218514  | -4.198666 | 1.667416  | 7      | 1      | 0    | -2.853027 | -3.129005 | 2.459007  |
| 124 | 1 | 0 | 7.548337  | -5.047312 | 2.279638  | 8      | 6      | 0    | -1.655230 | -1.415509 | 2.052513  |
| 125 | 1 | 0 | 7.331991  | -4.479178 | 0.613314  | 9      | 1      | 0    | -0.917200 | -0.715085 | 2.411015  |
| 126 | 1 | 0 | 7.889910  | -3.355173 | 1.861142  | 10     | 1      | 0    | -1.727608 | -0.153397 | 0.485263  |
| 127 | 6 | 0 | 4.830400  | -5.040214 | 1.777377  | 11     | 7      | 0    | -2.121825 | -1.027675 | 0.830960  |
| 128 | 1 | 0 | 4.875231  | -5.410564 | 0.746470  | 12     | 6      | 0    | -2.953358 | -1.754519 | 0.002936  |
| 129 | 1 | 0 | 5.126313  | -5.866307 | 2.435385  | 13     | 8      | 0    | -3.122496 | -1.100009 | -1.159165 |
| 130 | 1 | 0 | 3.787759  | -4.783135 | 1.992770  | 14     | 8      | 0    | -3.442026 | -2.837456 | 0.277810  |
| 131 | 6 | 0 | -1.786401 | 2.914284  | 3.239839  | 15     | 6      | 0    | -4.023865 | -1.723537 | -2.117952 |
| 132 | 1 | 0 | -0.927079 | 3.471145  | 2.860617  | 16     | 1      | 0    | -3.676882 | -1.340096 | -3.077542 |
| 133 | 6 | 0 | -1.216117 | 1.712940  | 4.017545  | 17     | 1      | 0    | -3.870366 | -2.803325 | -2.087783 |
| 134 | 1 | 0 | -0.631513 | 2.065375  | 4.876934  | 18     | 6      | 0    | -5.458661 | -1.345085 | -1.854238 |
| 135 | 1 | 0 | -2.008821 | 1.059647  | 4.402938  | 19     | 6      | 0    | -6.015165 | -0.217562 | -2.471152 |
| 136 | 1 | 0 | -0.557357 | 1.133647  | 3.365891  | 20     | 6      | 0    | -6.243307 | -2.093724 | -0.966909 |
| 137 | 6 | 0 | -2.564990 | 3.854058  | 4.182581  | 21     | 6      | 0    | -7.326719 | 0.169873  | -2.194302 |
| 138 | 1 | 0 | -1.915744 | 4.204091  | 4.994497  | 22     | 1      | 0    | -5.413936 | 0.364703  | -3.165570 |
| 139 | 1 | 0 | -2.947824 | 4.733695  | 3.652836  | 23     | 6      | 0    | -7.556644 | -1.710335 | -0.692894 |
| 140 | 1 | 0 | -3.422724 | 3.346326  | 4.639926  | 24     | 1      | 0    | -5.807179 | -2.957729 | -0.477062 |
| 141 | 6 | 0 | -2.964292 | 2.802621  | -1.799290 | 25     | 6      | 0    | -8.099360 | -0.576007 | -1.301371 |
| 142 | 1 | 0 | -2.055387 | 3.406589  | -1.847712 | 26     | 1      | 0    | -7.743228 | 1.051898  | -2.672931 |
| 143 | 6 | 0 | -2.742963 | 1.583890  | -2.713319 | 27     | 1      | 0    | -8.154492 | -2.293843 | 0.002021  |
| 144 | 1 | 0 | -2.550201 | 1.912227  | -3.742556 | 28     | 1      | 0    | -9.119809 | -0.274428 | -1.081103 |
| 145 | 1 | 0 | -1.884864 | 0.994906  | -2.377193 | 29     | 1      | 0    | 0.467989  | -1.630931 | -0.668436 |
| 146 | 1 | 0 | -3.623921 | 0.931502  | -2.729154 | 30     | 6      | 0    | -1.891001 | -4.361369 | -3.730714 |
| 147 | 6 | 0 | -4.115055 | 3.686355  | -2.321044 | 31     | 6      | 0    | -1.728985 | -5.072329 | -2.554901 |
| 148 | 1 | 0 | -5.068648 | 3.145027  | -2.332635 | 32     | 6      | 0    | -1.064149 | -4.492255 | -1.453886 |
| 149 | 1 | 0 | -4.245271 | 4.576260  | -1.695024 | 33     | 6      | 0    | -0.570139 | -3.168818 | -1.575018 |
| 150 | 1 | 0 | -3.908239 | 4.019260  | -3.345810 | 34     | 6      | 0    | -0.755946 | -2.437624 | -2.766024 |
| 151 | 6 | 0 | -5.960988 | 0.577795  | 1.597375  | 35     | 6      | 0    | -1.400355 | -3.042660 | -3.830270 |
| 152 | 1 | 0 | -6.344732 | 0.185261  | 0.646887  | 36     | 1      | 0    | -1.229537 | -6.175064 | -0.089794 |
| 153 | 6 | 0 | -5.789216 | -0.617533 | 2.550962  | 37     | 1      | 0    | -2.399111 | -4.814963 | -4.576416 |
| 154 | 1 | 0 | -5.426896 | -0.301635 | 3.536374  | 38     | 1      | 0    | -2.110255 | -6.085917 | -2.462123 |
| 155 | 1 | 0 | -6.751494 | -1.121352 | 2.702774  | 39     | 6      | 0    | -0.854315 | -5.161849 | -0.207456 |
| 156 | 1 | 0 | -5.084502 | -1.355699 | 2.155215  | 40     | 1      | 0    | -0.393282 | -1.416702 | -2.819169 |
| 157 | 6 | 0 | -7.014552 | 1.561354  | 2.147476  | 41     | 1      | 0    | -1.537098 | -2.486503 | -4.753382 |
| 158 | 1 | 0 | -7.974388 | 1.054815  | 2.308615  | 42     | 6      | 0    | 0.288186  | -3.206499 | 0.687203  |
| 159 | 1 | 0 | -6.692448 | 1.986118  | 3.106109  | 43     | 6      | 0    | -0.210162 | -4.546155 | 0.822564  |
| 160 | 1 | 0 | -7.178833 | 2.393133  | 1.453682  | 44     | 1      | 0    | -0.073571 | -5.053962 | 1.768532  |
|     |   |   |           |           |           | 45     | 7      | 0    | 0.082436  | -2.595504 | -0.507934 |
|     |   |   |           |           |           | 46     | 6      | 0    | 0.989597  | -2.497719 | 1.697944  |
|     |   |   |           |           |           | 47     | 1      | 0    | 1.301233  | -1.488399 | 1.455818  |
|     |   |   |           |           |           | 48     | 6      | 0    | 1.307517  | -2.997177 | 2.955238  |
|     |   |   |           |           |           | 49     | 1      | 0    | 1.220242  | -4.055967 | 3.174582  |
|     |   |   |           |           |           | 50     | 1      | 0    | 2.097517  | -2.492025 | 3.500479  |
|     |   |   |           |           |           | 51     | 6      | 0    | 4.119711  | 4.301912  | -3.164119 |
|     |   |   |           |           |           | 52     | 6      | 0    | 4.379742  | 2.995657  | -2.442947 |
|     |   |   |           |           |           | 53     | 6      | 0    | 3.492227  | 2.844633  | -1.367114 |
|     |   |   |           |           |           | 54     | 6      | 0    | 2.776248  | 4.761519  | -2.549734 |
|     |   |   |           |           |           | 55     | 1      | 0    | 4.916770  | 5.034114  | -2.974790 |

-----

**S\_endo2 [TSs(H)]**  
B3LYP-D/6-31g(d) in gas phase  
SCF Done: E(RB3LYP) = -3618.847049 hartree  
Sum of electronic and thermal Free Energies = -3617.583479 hartree  
The number of imaginary frequency = 1  
Imaginary frequency = -317.10

-----

| Center | Atomic | Atomic | Coordinates (Angstroms) |
|--------|--------|--------|-------------------------|
|--------|--------|--------|-------------------------|



|     |    |   |           |           |           |     |   |   |           |           |           |
|-----|----|---|-----------|-----------|-----------|-----|---|---|-----------|-----------|-----------|
| 56  | 1  | 0 | 4.065763  | 4.169902  | -4.250906 | 113 | 6 | 0 | 6.047353  | 0.381765  | 2.729866  |
| 57  | 1  | 0 | 1.938899  | 4.310421  | -3.094252 | 114 | 1 | 0 | 6.204203  | 1.286196  | 3.330368  |
| 58  | 1  | 0 | 2.640259  | 5.847466  | -2.560475 | 115 | 1 | 0 | 6.145879  | -0.482511 | 3.397593  |
| 59  | 6  | 0 | 2.799739  | 4.174725  | -1.102921 | 116 | 1 | 0 | 6.849320  | 0.321464  | 1.985408  |
| 60  | 6  | 0 | 3.707754  | 5.072358  | -0.192116 | 117 | 6 | 0 | 3.535515  | 0.551603  | 3.091670  |
| 61  | 6  | 0 | 1.470064  | 4.328265  | -0.376645 | 118 | 1 | 0 | 3.665411  | 1.468221  | 3.679947  |
| 62  | 6  | 0 | 2.790742  | 6.232505  | 0.240952  | 119 | 1 | 0 | 2.558091  | 0.596672  | 2.604227  |
| 63  | 1  | 0 | 4.620913  | 5.396958  | -0.699576 | 120 | 1 | 0 | 3.542278  | -0.291395 | 3.795279  |
| 64  | 1  | 0 | 4.002745  | 4.485456  | 0.685669  | 121 | 6 | 0 | 4.317103  | -4.575443 | 1.763663  |
| 65  | 6  | 0 | 1.442635  | 5.552766  | 0.309074  | 122 | 1 | 0 | 3.916586  | -4.399942 | 2.772849  |
| 66  | 1  | 0 | 3.085503  | 6.678354  | 1.197637  | 123 | 6 | 0 | 5.770896  | -5.063692 | 1.921617  |
| 67  | 1  | 0 | 2.795726  | 7.041838  | -0.502939 | 124 | 1 | 0 | 5.813461  | -5.999442 | 2.492969  |
| 68  | 6  | 0 | 5.325287  | 2.015056  | -2.721145 | 125 | 1 | 0 | 6.221198  | -5.243184 | 0.937830  |
| 69  | 6  | 0 | 5.342289  | 0.854866  | -1.945339 | 126 | 1 | 0 | 6.383361  | -4.315971 | 2.437024  |
| 70  | 6  | 0 | 4.373673  | 0.609083  | -0.958125 | 127 | 6 | 0 | 3.449974  | -5.660081 | 1.107711  |
| 71  | 6  | 0 | 3.438303  | 1.628064  | -0.691348 | 128 | 1 | 0 | 3.865378  | -5.978812 | 0.144547  |
| 72  | 1  | 0 | 6.039618  | 2.143306  | -3.530661 | 129 | 1 | 0 | 3.401072  | -6.548209 | 1.748755  |
| 73  | 1  | 0 | 6.089077  | 0.090169  | -2.136869 | 130 | 1 | 0 | 2.430419  | -5.303948 | 0.928863  |
| 74  | 6  | 0 | 0.365933  | 3.480185  | -0.309530 | 131 | 6 | 0 | -1.403291 | 2.905308  | 3.182273  |
| 75  | 6  | 0 | -0.785153 | 3.850513  | 0.414015  | 132 | 1 | 0 | -0.518253 | 3.437911  | 2.828454  |
| 76  | 6  | 0 | -0.810671 | 5.127157  | 0.998824  | 133 | 6 | 0 | -0.886868 | 1.668651  | 3.942707  |
| 77  | 6  | 0 | 0.294888  | 5.975125  | 0.968306  | 134 | 1 | 0 | -0.329949 | 1.981563  | 4.834836  |
| 78  | 1  | 0 | -1.708741 | 5.428069  | 1.529754  | 135 | 1 | 0 | -1.704556 | 1.016987  | 4.274428  |
| 79  | 1  | 0 | 0.266757  | 6.935070  | 1.477774  | 136 | 1 | 0 | -0.215007 | 1.099573  | 3.297088  |
| 80  | 8  | 0 | 2.464328  | 1.416747  | 0.270914  | 137 | 6 | 0 | -2.166499 | 3.848512  | 4.132539  |
| 81  | 8  | 0 | 1.014828  | -0.157642 | -1.247715 | 138 | 1 | 0 | -1.522188 | 4.163302  | 4.962519  |
| 82  | 8  | 0 | 0.206713  | 0.676704  | 1.082985  | 139 | 1 | 0 | -2.515375 | 4.747520  | 3.612532  |
| 83  | 15 | 0 | 0.955954  | 0.923637  | -0.192882 | 140 | 1 | 0 | -3.046433 | 3.354090  | 4.561382  |
| 84  | 8  | 0 | 0.407590  | 2.266615  | -0.980953 | 141 | 6 | 0 | -2.508358 | 2.925267  | -1.871715 |
| 85  | 6  | 0 | -1.947151 | 2.936599  | 0.644121  | 142 | 1 | 0 | -1.609215 | 3.544762  | -1.898973 |
| 86  | 6  | 0 | -2.263065 | 2.537527  | 1.970307  | 143 | 6 | 0 | -2.240338 | 1.694503  | -2.757147 |
| 87  | 6  | 0 | -2.778486 | 2.531135  | -0.421994 | 144 | 1 | 0 | -2.000655 | 2.008655  | -3.780719 |
| 88  | 6  | 0 | -3.423474 | 1.791335  | 2.193711  | 145 | 1 | 0 | -1.401018 | 1.109632  | -2.372714 |
| 89  | 6  | 0 | -3.924327 | 1.777002  | -0.140142 | 146 | 1 | 0 | -3.120087 | 1.043310  | -2.800036 |
| 90  | 6  | 0 | -4.278481 | 1.409109  | 1.156890  | 147 | 6 | 0 | -3.658602 | 3.776424  | -2.442533 |
| 91  | 1  | 0 | -3.669374 | 1.503970  | 3.212530  | 148 | 1 | 0 | -4.597076 | 3.210134  | -2.482480 |
| 92  | 1  | 0 | -4.571894 | 1.475828  | -0.956941 | 149 | 1 | 0 | -3.832846 | 4.666290  | -1.827245 |
| 93  | 6  | 0 | 4.324361  | -0.712085 | -0.258059 | 150 | 1 | 0 | -3.423506 | 4.105136  | -3.462382 |
| 94  | 6  | 0 | 4.166057  | -1.902807 | -1.010596 | 151 | 6 | 0 | -5.589198 | 0.681637  | 1.417440  |
| 95  | 6  | 0 | 4.461684  | -0.797183 | 1.150836  | 152 | 1 | 0 | -5.964210 | 0.328437  | 0.451122  |
| 96  | 6  | 0 | 4.147176  | -3.135355 | -0.345478 | 153 | 6 | 0 | -5.446879 | -0.546486 | 2.331354  |
| 97  | 6  | 0 | 4.447938  | -2.055329 | 1.757594  | 154 | 1 | 0 | -5.075575 | -0.271755 | 3.325578  |
| 98  | 6  | 0 | 4.286337  | -3.239039 | 1.036495  | 155 | 1 | 0 | -6.422353 | -1.029598 | 2.464425  |
| 99  | 1  | 0 | 4.017557  | -4.037168 | -0.935656 | 156 | 1 | 0 | -4.764367 | -1.289003 | 1.910558  |
| 100 | 1  | 0 | 4.567219  | -2.118743 | 2.837477  | 157 | 6 | 0 | -6.634347 | 1.661824  | 1.984789  |
| 101 | 6  | 0 | 4.019236  | -1.925859 | -2.532696 | 158 | 1 | 0 | -7.604872 | 1.165830  | 2.110855  |
| 102 | 1  | 0 | 3.986369  | -0.897066 | -2.894630 | 159 | 1 | 0 | -6.318083 | 2.046043  | 2.962480  |
| 103 | 6  | 0 | 2.697344  | -2.572450 | -2.973572 | 160 | 1 | 0 | -6.770306 | 2.519407  | 1.316633  |
| 104 | 1  | 0 | 2.620766  | -2.578257 | -4.067928 |     |   |   |           |           |           |
| 105 | 1  | 0 | 2.600784  | -3.608851 | -2.628582 |     |   |   |           |           |           |
| 106 | 1  | 0 | 1.867093  | -1.992009 | -2.575164 |     |   |   |           |           |           |
| 107 | 6  | 0 | 5.226581  | -2.616184 | -3.194787 |     |   |   |           |           |           |
| 108 | 1  | 0 | 5.142340  | -2.572428 | -4.287525 |     |   |   |           |           |           |
| 109 | 1  | 0 | 6.171105  | -2.141017 | -2.905896 |     |   |   |           |           |           |
| 110 | 1  | 0 | 5.289206  | -3.672492 | -2.906538 |     |   |   |           |           |           |
| 111 | 6  | 0 | 4.664609  | 0.419859  | 2.051095  |     |   |   |           |           |           |
| 112 | 1  | 0 | 4.641582  | 1.319397  | 1.433454  |     |   |   |           |           |           |

-----

**S\_endo2 [TSs(H)]**

M06-2X/6-31g(d) in gas phase

SCF Done: E(RM062X) = -3617.193091 hartree

Sum of electronic and thermal Free Energies = -3615.917654 hartree

The number of imaginary frequency = 1

Imaginary frequency = -344.52

| Center Number | Atomic Number | Atomic Type | Coordinates (Angstroms) |           |           |
|---------------|---------------|-------------|-------------------------|-----------|-----------|
|               |               |             | X                       | Y         | Z         |
| 1             | 6             | 0           | -0.147675               | -2.258249 | 4.355129  |
| 2             | 1             | 0           | 0.144454                | -1.246844 | 4.088176  |
| 3             | 1             | 0           | 0.302325                | -2.639732 | 5.266875  |
| 4             | 6             | 0           | -1.347618               | -2.787935 | 3.928028  |
| 5             | 1             | 0           | -1.701965               | -3.692057 | 4.420447  |
| 6             | 6             | 0           | -2.059430               | -2.380039 | 2.774994  |
| 7             | 1             | 0           | -2.881906               | -2.987324 | 2.422399  |
| 8             | 6             | 0           | -1.635592               | -1.300411 | 2.038902  |
| 9             | 1             | 0           | -0.879861               | -0.621797 | 2.413165  |
| 10            | 1             | 0           | -1.698255               | 0.000297  | 0.490954  |
| 11            | 7             | 0           | -2.087607               | -0.885390 | 0.820539  |
| 12            | 6             | 0           | -2.897033               | -1.615648 | -0.016282 |
| 13            | 8             | 0           | -3.088448               | -0.959899 | -1.167371 |
| 14            | 8             | 0           | -3.353820               | -2.711263 | 0.241451  |
| 15            | 6             | 0           | -3.991251               | -1.591080 | -2.095424 |
| 16            | 1             | 0           | -3.688936               | -1.199332 | -3.068514 |
| 17            | 1             | 0           | -3.822704               | -2.670591 | -2.071383 |
| 18            | 6             | 0           | -5.423789               | -1.236672 | -1.787238 |
| 19            | 6             | 0           | -6.013868               | -0.124946 | -2.393654 |
| 20            | 6             | 0           | -6.168260               | -1.991005 | -0.876098 |
| 21            | 6             | 0           | -7.319193               | 0.244825  | -2.081088 |
| 22            | 1             | 0           | -5.441646               | 0.458433  | -3.112590 |
| 23            | 6             | 0           | -7.475822               | -1.624890 | -0.565830 |
| 24            | 1             | 0           | -5.708248               | -2.852344 | -0.401765 |
| 25            | 6             | 0           | -8.051184               | -0.504852 | -1.162522 |
| 26            | 1             | 0           | -7.763848               | 1.115072  | -2.553734 |
| 27            | 1             | 0           | -8.045493               | -2.214320 | 0.146341  |
| 28            | 1             | 0           | -9.068901               | -0.218436 | -0.915475 |
| 29            | 1             | 0           | 0.391451                | -1.615413 | -0.694780 |
| 30            | 6             | 0           | -2.028774               | -4.271945 | -3.771384 |
| 31            | 6             | 0           | -1.920634               | -4.975659 | -2.590912 |
| 32            | 6             | 0           | -1.254695               | -4.412550 | -1.483771 |
| 33            | 6             | 0           | -0.710508               | -3.118871 | -1.606382 |
| 34            | 6             | 0           | -0.842662               | -2.387963 | -2.803651 |
| 35            | 6             | 0           | -1.485842               | -2.974879 | -3.872489 |
| 36            | 1             | 0           | -1.513697               | -6.074479 | -0.108691 |
| 37            | 1             | 0           | -2.534803               | -4.712659 | -4.623839 |
| 38            | 1             | 0           | -2.341480               | -5.972824 | -2.497048 |
| 39            | 6             | 0           | -1.089781               | -5.081294 | -0.228892 |
| 40            | 1             | 0           | -0.430458               | -1.383425 | -2.853571 |
| 41            | 1             | 0           | -1.581193               | -2.424547 | -4.803452 |
| 42            | 6             | 0           | 0.140302                | -3.179154 | 0.644898  |
| 43            | 6             | 0           | -0.427290               | -4.490433 | 0.797452  |
| 44            | 1             | 0           | -0.318261               | -4.992577 | 1.751105  |
| 45            | 7             | 0           | -0.040395               | -2.567301 | -0.540455 |
| 46            | 6             | 0           | 0.902937                | -2.504582 | 1.639709  |
| 47            | 1             | 0           | 1.285200                | -1.520547 | 1.376904  |
| 48            | 6             | 0           | 1.214533                | -3.031268 | 2.877830  |
| 49            | 1             | 0           | 1.049981                | -4.080255 | 3.103477  |
| 50            | 1             | 0           | 2.033765                | -2.573301 | 3.423952  |
| 51            | 6             | 0           | 4.216871                | 4.162876  | -3.187896 |
| 52            | 6             | 0           | 4.429405                | 2.848254  | -2.468896 |
| 53            | 6             | 0           | 3.552133                | 2.741547  | -1.385465 |
| 54            | 6             | 0           | 2.895300                | 4.667098  | -2.572497 |
| 55            | 1             | 0           | 5.040234                | 4.862248  | -2.996120 |
| 56            | 1             | 0           | 4.155085                | 4.032111  | -4.272567 |
| 57            | 1             | 0           | 2.043981                | 4.236734  | -3.111066 |
| 58            | 1             | 0           | 2.794512                | 5.756732  | -2.586977 |
| 59            | 6             | 0           | 2.908517                | 4.092670  | -1.129908 |
| 60            | 6             | 0           | 3.841962                | 4.968277  | -0.240849 |
| 61            | 6             | 0           | 1.592775                | 4.280085  | -0.394425 |
| 62            | 6             | 0           | 2.960975                | 6.151430  | 0.190407  |
| 63            | 1             | 0           | 4.756432                | 5.264518  | -0.763202 |
| 64            | 1             | 0           | 4.127761                | 4.382636  | 0.640253  |
| 65            | 6             | 0           | 1.600830                | 5.501871  | 0.286787  |
| 66            | 1             | 0           | 3.278613                | 6.598288  | 1.137171  |
| 67            | 1             | 0           | 2.968571                | 6.949444  | -0.563244 |
| 68            | 6             | 0           | 5.320496                | 1.824213  | -2.757617 |
| 69            | 6             | 0           | 5.292430                | 0.669688  | -1.978543 |
| 70            | 6             | 0           | 4.337655                | 0.480268  | -0.972280 |
| 71            | 6             | 0           | 3.458921                | 1.538690  | -0.697236 |
| 72            | 1             | 0           | 6.026443                | 1.914582  | -3.578453 |
| 73            | 1             | 0           | 5.994599                | -0.135071 | -2.179705 |
| 74            | 6             | 0           | 0.474858                | 3.457218  | -0.314053 |
| 75            | 6             | 0           | -0.654333               | 3.850712  | 0.421224  |
| 76            | 6             | 0           | -0.642927               | 5.119298  | 1.013309  |
| 77            | 6             | 0           | 0.475921                | 5.944520  | 0.966612  |
| 78            | 1             | 0           | -1.528346               | 5.435963  | 1.557768  |
| 79            | 1             | 0           | 0.475256                | 6.903121  | 1.477718  |
| 80            | 8             | 0           | 2.503512                | 1.383846  | 0.284665  |
| 81            | 8             | 0           | 1.035113                | -0.182325 | -1.185016 |
| 82            | 8             | 0           | 0.238179                | 0.734285  | 1.111908  |
| 83            | 15            | 0           | 0.994493                | 0.921460  | -0.161452 |
| 84            | 8             | 0           | 0.485181                | 2.247173  | -0.980097 |
| 85            | 6             | 0           | -1.840498               | 2.967681  | 0.639058  |
| 86            | 6             | 0           | -2.184431               | 2.580802  | 1.957651  |
| 87            | 6             | 0           | -2.661197               | 2.582121  | -0.435919 |
| 88            | 6             | 0           | -3.361862               | 1.863504  | 2.165467  |
| 89            | 6             | 0           | -3.827776               | 1.857657  | -0.172082 |
| 90            | 6             | 0           | -4.206844               | 1.499286  | 1.116348  |
| 91            | 1             | 0           | -3.629052               | 1.582393  | 3.182917  |
| 92            | 1             | 0           | -4.470784               | 1.567655  | -1.000125 |
| 93            | 6             | 0           | 4.247177                | -0.823423 | -0.246871 |
| 94            | 6             | 0           | 4.043535                | -2.017426 | -0.972853 |
| 95            | 6             | 0           | 4.401727                | -0.884919 | 1.156741  |
| 96            | 6             | 0           | 3.999735                | -3.235318 | -0.287931 |
| 97            | 6             | 0           | 4.369729                | -2.128578 | 1.786145  |
| 98            | 6             | 0           | 4.163905                | -3.316426 | 1.090051  |
| 99            | 1             | 0           | 3.833112                | -4.144971 | -0.860114 |
| 100           | 1             | 0           | 4.508121                | -2.176557 | 2.866375  |
| 101           | 6             | 0           | 3.868709                | -2.063260 | -2.486316 |
| 102           | 1             | 0           | 3.867868                | -1.041656 | -2.869973 |
| 103           | 6             | 0           | 2.517162                | -2.665515 | -2.875272 |
| 104           | 1             | 0           | 2.413870                | -2.704308 | -3.965539 |
| 105           | 1             | 0           | 2.387618                | -3.683800 | -2.489526 |
| 106           | 1             | 0           | 1.725589                | -2.032339 | -2.475575 |
| 107           | 6             | 0           | 5.024113                | -2.822867 | -3.150027 |
| 108           | 1             | 0           | 4.922648                | -2.797080 | -4.240164 |
| 109           | 1             | 0           | 5.995589                | -2.393235 | -2.884592 |
| 110           | 1             | 0           | 5.033391                | -3.873810 | -2.839690 |

|     |   |   |           |           |           |
|-----|---|---|-----------|-----------|-----------|
| 111 | 6 | 0 | 4.634977  | 0.336640  | 2.034631  |
| 112 | 1 | 0 | 4.630331  | 1.229380  | 1.406264  |
| 113 | 6 | 0 | 6.008235  | 0.269716  | 2.715470  |
| 114 | 1 | 0 | 6.183446  | 1.173615  | 3.308497  |
| 115 | 1 | 0 | 6.077629  | -0.590613 | 3.390280  |
| 116 | 1 | 0 | 6.809917  | 0.182132  | 1.975773  |
| 117 | 6 | 0 | 3.514437  | 0.490732  | 3.072071  |
| 118 | 1 | 0 | 3.646233  | 1.418025  | 3.640071  |
| 119 | 1 | 0 | 2.533334  | 0.523282  | 2.587885  |
| 120 | 1 | 0 | 3.531247  | -0.338701 | 3.790654  |
| 121 | 6 | 0 | 4.165435  | -4.637785 | 1.835018  |
| 122 | 1 | 0 | 3.817540  | -4.430227 | 2.857065  |
| 123 | 6 | 0 | 5.594175  | -5.189900 | 1.931218  |
| 124 | 1 | 0 | 5.616898  | -6.124331 | 2.502466  |
| 125 | 1 | 0 | 5.986675  | -5.390970 | 0.928242  |
| 126 | 1 | 0 | 6.261974  | -4.470633 | 2.414400  |
| 127 | 6 | 0 | 3.227993  | -5.680608 | 1.223836  |
| 128 | 1 | 0 | 3.607739  | -6.040190 | 0.261412  |
| 129 | 1 | 0 | 3.142269  | -6.549652 | 1.884334  |
| 130 | 1 | 0 | 2.227992  | -5.267139 | 1.055169  |
| 131 | 6 | 0 | -1.339731 | 2.932326  | 3.178722  |
| 132 | 1 | 0 | -0.436804 | 3.445424  | 2.840421  |
| 133 | 6 | 0 | -0.872029 | 1.688714  | 3.946535  |
| 134 | 1 | 0 | -0.351622 | 1.989356  | 4.862924  |
| 135 | 1 | 0 | -1.712032 | 1.045292  | 4.236280  |
| 136 | 1 | 0 | -0.178926 | 1.118294  | 3.323737  |
| 137 | 6 | 0 | -2.105569 | 3.879438  | 4.112884  |
| 138 | 1 | 0 | -1.470347 | 4.189879  | 4.949204  |
| 139 | 1 | 0 | -2.445946 | 4.777691  | 3.588229  |
| 140 | 1 | 0 | -2.990860 | 3.386136  | 4.529857  |
| 141 | 6 | 0 | -2.363520 | 2.960975  | -1.878984 |
| 142 | 1 | 0 | -1.440815 | 3.545441  | -1.903200 |
| 143 | 6 | 0 | -2.146954 | 1.716177  | -2.746672 |
| 144 | 1 | 0 | -1.874446 | 2.007714  | -3.767067 |
| 145 | 1 | 0 | -1.348793 | 1.087937  | -2.339581 |
| 146 | 1 | 0 | -3.064731 | 1.117849  | -2.797261 |
| 147 | 6 | 0 | -3.478784 | 3.840414  | -2.458336 |
| 148 | 1 | 0 | -4.430999 | 3.298643  | -2.496739 |
| 149 | 1 | 0 | -3.628104 | 4.737990  | -1.850492 |
| 150 | 1 | 0 | -3.229259 | 4.151812  | -3.478370 |
| 151 | 6 | 0 | -5.522262 | 0.783954  | 1.357379  |
| 152 | 1 | 0 | -5.904031 | 0.471062  | 0.378444  |
| 153 | 6 | 0 | -5.380074 | -0.468274 | 2.227094  |
| 154 | 1 | 0 | -4.979621 | -0.225400 | 3.217933  |
| 155 | 1 | 0 | -6.359840 | -0.938204 | 2.369317  |
| 156 | 1 | 0 | -4.719704 | -1.210406 | 1.769056  |
| 157 | 6 | 0 | -6.547394 | 1.747548  | 1.968393  |
| 158 | 1 | 0 | -7.521079 | 1.256421  | 2.075270  |
| 159 | 1 | 0 | -6.222068 | 2.080756  | 2.960802  |
| 160 | 1 | 0 | -6.673619 | 2.634550  | 1.340395  |

**R\_exo\_t-t**

M06-2X/6-31g(d) in gas phase

SCF Done: E(RM062X) = -3617.175954 hartree

Sum of electronic and thermal Free Energies = -3615.904635 hartree

The number of imaginary frequency = 1  
Imaginary frequency = -369.23

| Center Number | Atomic Number | Atomic Type | Coordinates (Angstroms) |           |           |
|---------------|---------------|-------------|-------------------------|-----------|-----------|
|               |               |             | X                       | Y         | Z         |
| 1             | 6             | 0           | -1.197034               | -4.625063 | -2.653573 |
| 2             | 1             | 0           | -0.237319               | -5.015098 | -2.328185 |
| 3             | 1             | 0           | -1.877086               | -5.371140 | -3.053750 |
| 4             | 6             | 0           | -1.324299               | -3.309091 | -3.052847 |
| 5             | 1             | 0           | -2.224274               | -3.027896 | -3.597207 |
| 6             | 6             | 0           | -0.489219               | -2.254574 | -2.624388 |
| 7             | 1             | 0           | -0.771614               | -1.223237 | -2.815479 |
| 8             | 6             | 0           | 0.612918                | -2.499443 | -1.843667 |
| 9             | 1             | 0           | 0.999734                | -3.503242 | -1.710172 |
| 10            | 1             | 0           | 0.953790                | -0.555674 | -1.224505 |
| 11            | 7             | 0           | 1.340541                | -1.527239 | -1.235128 |
| 12            | 6             | 0           | 2.472206                | -1.749600 | -0.486090 |
| 13            | 8             | 0           | 2.893413                | -3.035191 | -0.576463 |
| 14            | 8             | 0           | 3.017907                | -0.904206 | 0.176461  |
| 15            | 6             | 0           | 4.169136                | -3.278178 | 0.011619  |
| 16            | 1             | 0           | 4.191014                | -2.859869 | 1.023203  |
| 17            | 1             | 0           | 4.236180                | -4.368067 | 0.078718  |
| 18            | 6             | 0           | 5.306509                | -2.709484 | -0.806919 |
| 19            | 6             | 0           | 6.599983                | -2.769834 | -0.285205 |
| 20            | 6             | 0           | 5.102008                | -2.118030 | -2.051888 |
| 21            | 6             | 0           | 7.673047                | -2.234362 | -0.989499 |
| 22            | 1             | 0           | 6.764125                | -3.222841 | 0.690454  |
| 23            | 6             | 0           | 6.175939                | -1.576880 | -2.757045 |
| 24            | 1             | 0           | 4.102171                | -2.069116 | -2.474058 |
| 25            | 6             | 0           | 7.462136                | -1.629771 | -2.227942 |
| 26            | 1             | 0           | 8.672473                | -2.278713 | -0.567437 |
| 27            | 1             | 0           | 6.000938                | -1.107784 | -3.720905 |
| 28            | 1             | 0           | 8.295988                | -1.201286 | -2.774843 |
| 29            | 1             | 0           | -0.116114               | -1.499267 | 1.187624  |
| 30            | 6             | 0           | 3.571151                | -2.218858 | 4.068869  |
| 31            | 6             | 0           | 3.172068                | -3.440854 | 3.575579  |
| 32            | 6             | 0           | 2.084429                | -3.522602 | 2.680261  |
| 33            | 6             | 0           | 1.415027                | -2.336195 | 2.316126  |
| 34            | 6             | 0           | 1.826953                | -1.086323 | 2.815673  |
| 35            | 6             | 0           | 2.895164                | -1.041763 | 3.681933  |
| 36            | 1             | 0           | 2.139230                | -5.667812 | 2.351447  |
| 37            | 1             | 0           | 4.413457                | -2.154486 | 4.749682  |
| 38            | 1             | 0           | 3.687746                | -4.354134 | 3.860068  |
| 39            | 6             | 0           | 1.631176                | -4.742739 | 2.090304  |
| 40            | 1             | 0           | 1.316502                | -0.188470 | 2.479995  |
| 41            | 1             | 0           | 3.234658                | -0.082141 | 4.058327  |
| 42            | 6             | 0           | -0.104997               | -3.545667 | 0.891702  |
| 43            | 6             | 0           | 0.582465                | -4.758509 | 1.225986  |
| 44            | 1             | 0           | 0.236156                | -5.688856 | 0.793341  |
| 45            | 7             | 0           | 0.364553                | -2.405508 | 1.433628  |
| 46            | 6             | 0           | -1.257914               | -3.465729 | 0.062758  |
| 47            | 1             | 0           | -1.724788               | -2.484351 | -0.010724 |
| 48            | 6             | 0           | -1.843385               | -4.535453 | -0.589173 |
| 49            | 1             | 0           | -1.520814               | -5.555342 | -0.397700 |
| 50            | 1             | 0           | -2.876195               | -4.431203 | -0.889036 |
| 51            | 6             | 0           | -3.976218               | 4.940662  | 2.186434  |

|     |    |   |           |           |           |     |   |   |           |           |           |
|-----|----|---|-----------|-----------|-----------|-----|---|---|-----------|-----------|-----------|
| 52  | 6  | 0 | -4.225775 | 3.504511  | 1.784074  | 109 | 1 | 0 | 3.304064  | 0.284618  | -3.405308 |
| 53  | 6  | 0 | -3.342947 | 3.121427  | 0.770342  | 110 | 1 | 0 | 1.562335  | 0.364166  | -3.043768 |
| 54  | 6  | 0 | -2.619673 | 5.235851  | 1.520390  | 111 | 6 | 0 | 2.109402  | 3.579921  | 2.066855  |
| 55  | 1  | 0 | -4.763122 | 5.601305  | 1.800723  | 112 | 1 | 0 | 1.248344  | 4.132518  | 1.683236  |
| 56  | 1  | 0 | -3.953564 | 5.069332  | 3.272869  | 113 | 6 | 0 | 3.081115  | 4.615039  | 2.649631  |
| 57  | 1  | 0 | -1.804480 | 4.906677  | 2.174967  | 114 | 1 | 0 | 3.955814  | 4.131501  | 3.098227  |
| 58  | 1  | 0 | -2.464643 | 6.293842  | 1.287980  | 115 | 1 | 0 | 3.437610  | 5.297478  | 1.872124  |
| 59  | 6  | 0 | -2.615198 | 4.343862  | 0.247252  | 116 | 1 | 0 | 2.588484  | 5.206146  | 3.429257  |
| 60  | 6  | 0 | -3.429208 | 5.042187  | -0.879782 | 117 | 6 | 0 | 1.595074  | 2.638883  | 3.160643  |
| 61  | 6  | 0 | -1.245812 | 4.302706  | -0.395589 | 118 | 1 | 0 | 1.144638  | 3.212722  | 3.978289  |
| 62  | 6  | 0 | -2.443702 | 6.055647  | -1.490714 | 119 | 1 | 0 | 0.835516  | 1.963019  | 2.758928  |
| 63  | 1  | 0 | -4.352927 | 5.495683  | -0.507329 | 120 | 1 | 0 | 2.415904  | 2.048408  | 3.585785  |
| 64  | 1  | 0 | -3.696948 | 4.288727  | -1.629364 | 121 | 6 | 0 | 5.907058  | 0.673544  | 0.455416  |
| 65  | 6  | 0 | -1.112816 | 5.365025  | -1.294922 | 122 | 1 | 0 | 6.024038  | -0.041112 | -0.368113 |
| 66  | 1  | 0 | -2.652393 | 6.268279  | -2.543565 | 123 | 6 | 0 | 5.844774  | -0.130464 | 1.754426  |
| 67  | 1  | 0 | -2.475429 | 7.013844  | -0.956330 | 124 | 1 | 0 | 5.816166  | 0.525096  | 2.633516  |
| 68  | 6  | 0 | -5.167167 | 2.612112  | 2.276512  | 125 | 1 | 0 | 4.951013  | -0.762030 | 1.767006  |
| 69  | 6  | 0 | -5.203966 | 1.325283  | 1.749706  | 126 | 1 | 0 | 6.734005  | -0.763934 | 1.849167  |
| 70  | 6  | 0 | -4.271679 | 0.883224  | 0.801593  | 127 | 6 | 0 | 7.126944  | 1.602581  | 0.445760  |
| 71  | 6  | 0 | -3.313866 | 1.798647  | 0.342719  | 128 | 1 | 0 | 8.051656  | 1.030293  | 0.583636  |
| 72  | 1  | 0 | -5.870291 | 2.911438  | 3.048640  | 129 | 1 | 0 | 7.196633  | 2.148297  | -0.500332 |
| 73  | 1  | 0 | -5.958566 | 0.621524  | 2.090932  | 130 | 1 | 0 | 7.055224  | 2.339478  | 1.254332  |
| 74  | 6  | 0 | -0.173110 | 3.454173  | -0.165852 | 131 | 6 | 0 | -4.712159 | 0.324452  | -2.125645 |
| 75  | 6  | 0 | 1.085817  | 3.724890  | -0.721685 | 132 | 1 | 0 | -4.556079 | 1.291552  | -1.644429 |
| 76  | 6  | 0 | 1.206759  | 4.844363  | -1.552323 | 133 | 6 | 0 | -6.099867 | 0.370124  | -2.779360 |
| 77  | 6  | 0 | 0.114820  | 5.646867  | -1.874871 | 134 | 1 | 0 | -6.310761 | -0.544557 | -3.343992 |
| 78  | 1  | 0 | 2.184697  | 5.068204  | -1.968956 | 135 | 1 | 0 | -6.885433 | 0.490396  | -2.027033 |
| 79  | 1  | 0 | 0.228545  | 6.478949  | -2.564088 | 136 | 1 | 0 | -6.159954 | 1.211307  | -3.477806 |
| 80  | 8  | 0 | -2.377074 | 1.403163  | -0.588307 | 137 | 6 | 0 | -3.612870 | 0.151452  | -3.180080 |
| 81  | 8  | 0 | -0.927728 | -0.074504 | 0.974513  | 138 | 1 | 0 | -3.673674 | 0.949997  | -3.927248 |
| 82  | 8  | 0 | -0.111657 | 0.732660  | -1.374085 | 139 | 1 | 0 | -2.624144 | 0.194805  | -2.715689 |
| 83  | 15 | 0 | -0.868204 | 0.973817  | -0.103479 | 140 | 1 | 0 | -3.723179 | -0.804822 | -3.706916 |
| 84  | 8  | 0 | -0.353649 | 2.342911  | 0.640595  | 141 | 6 | 0 | -5.433315 | -4.528201 | -0.985266 |
| 85  | 6  | 0 | 2.283112  | 2.890425  | -0.410608 | 142 | 1 | 0 | -4.882417 | -5.251445 | -0.366787 |
| 86  | 6  | 0 | 2.990016  | 2.237806  | -1.443971 | 143 | 6 | 0 | -3.996365 | -1.429586 | 2.683091  |
| 87  | 6  | 0 | 2.759767  | 2.822871  | 0.914719  | 144 | 1 | 0 | -3.805931 | -0.371948 | 2.876769  |
| 88  | 6  | 0 | 4.158341  | 1.548807  | -1.124050 | 145 | 6 | 0 | -5.146287 | -1.881163 | 3.591672  |
| 89  | 6  | 0 | 3.921584  | 2.096388  | 1.183251  | 146 | 1 | 0 | -5.331641 | -2.956541 | 3.492309  |
| 90  | 6  | 0 | 4.636915  | 1.453309  | 0.179282  | 147 | 1 | 0 | -4.902861 | -1.681909 | 4.640432  |
| 91  | 1  | 0 | 4.710340  | 1.037278  | -1.912196 | 148 | 1 | 0 | -6.079399 | -1.361528 | 3.351598  |
| 92  | 1  | 0 | 4.279797  | 2.046100  | 2.209986  | 149 | 6 | 0 | -2.703102 | -2.175363 | 3.027943  |
| 93  | 6  | 0 | -4.375028 | -0.517698 | 0.294795  | 150 | 1 | 0 | -2.489519 | -2.090387 | 4.099179  |
| 94  | 6  | 0 | -4.347205 | -1.596130 | 1.209084  | 151 | 1 | 0 | -2.768920 | -3.240824 | 2.776588  |
| 95  | 6  | 0 | -4.637778 | -0.768973 | -1.067991 | 152 | 1 | 0 | -1.872741 | -1.731219 | 2.476002  |
| 96  | 6  | 0 | -4.651009 | -2.877552 | 0.751205  | 153 | 6 | 0 | -6.925555 | -4.689086 | -0.661818 |
| 97  | 6  | 0 | -4.915805 | -2.076997 | -1.477992 | 154 | 1 | 0 | -7.513858 | -3.969264 | -1.241225 |
| 98  | 6  | 0 | -4.969971 | -3.138457 | -0.580900 | 155 | 1 | 0 | -7.273618 | -5.697634 | -0.909644 |
| 99  | 1  | 0 | -4.646219 | -3.707389 | 1.457898  | 156 | 1 | 0 | -7.119499 | -4.504808 | 0.398744  |
| 100 | 1  | 0 | -5.138480 | -2.252133 | -2.527753 | 157 | 6 | 0 | -5.173668 | -4.863484 | -2.455201 |
| 101 | 6  | 0 | 2.559295  | 2.283365  | -2.905457 | 158 | 1 | 0 | -5.817495 | -4.270792 | -3.113630 |
| 102 | 1  | 0 | 1.581933  | 2.769154  | -2.964005 | 159 | 1 | 0 | -4.134132 | -4.666810 | -2.740731 |
| 103 | 6  | 0 | 3.563261  | 3.099857  | -3.731889 | 160 | 1 | 0 | -5.391309 | -5.918260 | -2.649013 |
| 104 | 1  | 0 | 4.540994  | 2.604291  | -3.748642 |     |   |   |           |           |           |
| 105 | 1  | 0 | 3.219464  | 3.201661  | -4.766902 |     |   |   |           |           |           |
| 106 | 1  | 0 | 3.712306  | 4.102256  | -3.318717 |     |   |   |           |           |           |
| 107 | 6  | 0 | 2.394318  | 0.887147  | -3.516665 |     |   |   |           |           |           |
| 108 | 1  | 0 | 2.179553  | 0.970823  | -4.587947 |     |   |   |           |           |           |

-----  
**S\_exo\_t-t**

M06-2X/6-31g(d) in gas phase

SCF Done: E(RM062X) = -3617.177845 hartree

Sum of electronic and thermal Free Energies = -3615.905438  
hartree  
The number of imaginary frequency = 1  
Imaginary frequency = -440.09

| Center<br>Number | Atomic<br>Number | Atomic<br>Type | Coordinates (Angstroms) |           |           |
|------------------|------------------|----------------|-------------------------|-----------|-----------|
|                  |                  |                | X                       | Y         | Z         |
| 1                | 6                | 0              | 2.474309                | -0.475079 | 4.865976  |
| 2                | 1                | 0              | 3.102396                | -1.251553 | 4.438246  |
| 3                | 1                | 0              | 2.618442                | -0.322950 | 5.931504  |
| 4                | 6                | 0              | 2.075949                | 0.602194  | 4.086062  |
| 5                | 1                | 0              | 1.690946                | 1.483374  | 4.594996  |
| 6                | 6                | 0              | 1.912670                | 0.557719  | 2.688865  |
| 7                | 1                | 0              | 1.390476                | 1.357220  | 2.170672  |
| 8                | 6                | 0              | 2.357826                | -0.516378 | 1.955808  |
| 9                | 1                | 0              | 2.991301                | -1.272542 | 2.405943  |
| 10               | 1                | 0              | 1.419849                | -0.133829 | 0.118354  |
| 11               | 7                | 0              | 2.129001                | -0.698700 | 0.636139  |
| 12               | 6                | 0              | 2.757325                | -1.657144 | -0.135894 |
| 13               | 8                | 0              | 3.699822                | -2.329998 | 0.555648  |
| 14               | 8                | 0              | 2.481742                | -1.863524 | -1.292117 |
| 15               | 6                | 0              | 4.493378                | -3.232099 | -0.239000 |
| 16               | 1                | 0              | 4.902659                | -3.938336 | 0.486257  |
| 17               | 1                | 0              | 3.834771                | -3.754159 | -0.937303 |
| 18               | 6                | 0              | 5.591225                | -2.484289 | -0.951165 |
| 19               | 6                | 0              | 5.391126                | -1.970901 | -2.236141 |
| 20               | 6                | 0              | 6.804388                | -2.248243 | -0.302006 |
| 21               | 6                | 0              | 6.391490                | -1.224443 | -2.854633 |
| 22               | 1                | 0              | 4.442127                | -2.142669 | -2.734710 |
| 23               | 6                | 0              | 7.804259                | -1.501533 | -0.919001 |
| 24               | 1                | 0              | 6.960954                | -2.643450 | 0.699223  |
| 25               | 6                | 0              | 7.596590                | -0.986077 | -2.196877 |
| 26               | 1                | 0              | 6.226264                | -0.824237 | -3.850263 |
| 27               | 1                | 0              | 8.742412                | -1.320149 | -0.403075 |
| 28               | 1                | 0              | 8.372605                | -0.398984 | -2.678432 |
| 29               | 1                | 0              | -0.729290               | -1.534007 | 1.275013  |
| 30               | 6                | 0              | 0.473738                | -4.635750 | -2.114760 |
| 31               | 6                | 0              | 1.092238                | -5.012161 | -0.941707 |
| 32               | 6                | 0              | 0.879679                | -4.274331 | 0.240179  |
| 33               | 6                | 0              | 0.019021                | -3.155837 | 0.198993  |
| 34               | 6                | 0              | -0.617686               | -2.778059 | -0.994104 |
| 35               | 6                | 0              | -0.380318               | -3.515601 | -2.133642 |
| 36               | 1                | 0              | 2.164490                | -5.441289 | 1.545506  |
| 37               | 1                | 0              | 0.643443                | -5.199975 | -3.025689 |
| 38               | 1                | 0              | 1.749177                | -5.877671 | -0.908997 |
| 39               | 6                | 0              | 1.507035                | -4.576698 | 1.490854  |
| 40               | 1                | 0              | -1.268009               | -1.908223 | -1.006606 |
| 41               | 1                | 0              | -0.863947               | -3.219086 | -3.059757 |
| 42               | 6                | 0              | 0.456500                | -2.646433 | 2.516833  |
| 43               | 6                | 0              | 1.304539                | -3.802667 | 2.588750  |
| 44               | 1                | 0              | 1.789170                | -4.032380 | 3.530322  |
| 45               | 7                | 0              | -0.156708               | -2.409428 | 1.338426  |
| 46               | 6                | 0              | 0.229152                | -1.727187 | 3.569125  |
| 47               | 1                | 0              | -0.424648               | -0.896158 | 3.318077  |
| 48               | 6                | 0              | 0.809952                | -1.747744 | 4.830494  |
| 49               | 1                | 0              | 1.353172                | -2.624356 | 5.175326  |

|     |    |   |           |           |           |
|-----|----|---|-----------|-----------|-----------|
| 50  | 1  | 0 | 0.302411  | -1.205667 | 5.620160  |
| 51  | 6  | 0 | -3.238698 | 5.644661  | -1.785766 |
| 52  | 6  | 0 | -1.853739 | 5.128539  | -1.478359 |
| 53  | 6  | 0 | -1.909199 | 4.093383  | -0.537365 |
| 54  | 6  | 0 | -4.117678 | 4.498574  | -1.267341 |
| 55  | 1  | 0 | -3.442063 | 6.578941  | -1.246457 |
| 56  | 1  | 0 | -3.382844 | 5.847710  | -2.851059 |
| 57  | 1  | 0 | -4.182294 | 3.712900  | -2.028712 |
| 58  | 1  | 0 | -5.135612 | 4.802093  | -1.005974 |
| 59  | 6  | 0 | -3.337036 | 3.930634  | -0.043309 |
| 60  | 6  | 0 | -3.672838 | 4.778055  | 1.212757  |
| 61  | 6  | 0 | -3.942958 | 2.601451  | 0.358433  |
| 62  | 6  | 0 | -5.067029 | 4.271559  | 1.642429  |
| 63  | 1  | 0 | -3.643759 | 5.853434  | 1.011267  |
| 64  | 1  | 0 | -2.936231 | 4.554575  | 1.992034  |
| 65  | 6  | 0 | -5.050125 | 2.829710  | 1.179914  |
| 66  | 1  | 0 | -5.230733 | 4.353980  | 2.721276  |
| 67  | 1  | 0 | -5.867735 | 4.840152  | 1.153358  |
| 68  | 6  | 0 | -0.647259 | 5.534369  | -2.025725 |
| 69  | 6  | 0 | 0.507880  | 4.850549  | -1.664155 |
| 70  | 6  | 0 | 0.479382  | 3.756996  | -0.791877 |
| 71  | 6  | 0 | -0.746442 | 3.403260  | -0.201879 |
| 72  | 1  | 0 | -0.605531 | 6.353720  | -2.737799 |
| 73  | 1  | 0 | 1.467847  | 5.151049  | -2.072929 |
| 74  | 6  | 0 | -3.632840 | 1.308446  | -0.035639 |
| 75  | 6  | 0 | -4.508743 | 0.246120  | 0.230350  |
| 76  | 6  | 0 | -5.679579 | 0.531862  | 0.942808  |
| 77  | 6  | 0 | -5.936530 | 1.799845  | 1.461620  |
| 78  | 1  | 0 | -6.378473 | -0.278410 | 1.130747  |
| 79  | 1  | 0 | -6.817540 | 1.972746  | 2.073370  |
| 80  | 8  | 0 | -0.815681 | 2.388620  | 0.740960  |
| 81  | 8  | 0 | -0.035247 | 0.388882  | -0.702237 |
| 82  | 8  | 0 | -1.431419 | 0.040158  | 1.451208  |
| 83  | 15 | 0 | -1.111203 | 0.852750  | 0.228103  |
| 84  | 8  | 0 | -2.447381 | 1.065670  | -0.701205 |
| 85  | 6  | 0 | -4.198867 | -1.147675 | -0.210325 |
| 86  | 6  | 0 | -4.117147 | -2.188357 | 0.741363  |
| 87  | 6  | 0 | -4.020964 | -1.446516 | -1.581048 |
| 88  | 6  | 0 | -3.849862 | -3.490171 | 0.307730  |
| 89  | 6  | 0 | -3.780740 | -2.767166 | -1.959384 |
| 90  | 6  | 0 | -3.677163 | -3.804019 | -1.036075 |
| 91  | 1  | 0 | -3.778297 | -4.279909 | 1.051700  |
| 92  | 1  | 0 | -3.650166 | -2.998141 | -3.016393 |
| 93  | 6  | 0 | 1.760713  | 3.033446  | -0.521086 |
| 94  | 6  | 0 | 2.272318  | 2.124622  | -1.475410 |
| 95  | 6  | 0 | 2.500080  | 3.344834  | 0.632490  |
| 96  | 6  | 0 | 3.495535  | 1.507978  | -1.212591 |
| 97  | 6  | 0 | 3.716960  | 2.693018  | 0.854316  |
| 98  | 6  | 0 | 4.225537  | 1.764298  | -0.050233 |
| 99  | 1  | 0 | 3.899774  | 0.795994  | -1.930687 |
| 100 | 1  | 0 | 4.287041  | 2.933802  | 1.750848  |
| 101 | 6  | 0 | 2.060053  | 4.444428  | 1.592154  |
| 102 | 1  | 0 | 1.118392  | 4.860881  | 1.223548  |
| 103 | 6  | 0 | 3.090874  | 5.581134  | 1.596749  |
| 104 | 1  | 0 | 2.743385  | 6.412620  | 2.219093  |
| 105 | 1  | 0 | 4.053182  | 5.241241  | 1.995411  |
| 106 | 1  | 0 | 3.261732  | 5.955803  | 0.582857  |

|     |   |   |           |           |           |
|-----|---|---|-----------|-----------|-----------|
| 107 | 6 | 0 | 1.806093  | 3.937744  | 3.014955  |
| 108 | 1 | 0 | 0.944181  | 3.263036  | 3.039357  |
| 109 | 1 | 0 | 2.679517  | 3.404977  | 3.409692  |
| 110 | 1 | 0 | 1.593657  | 4.778556  | 3.684229  |
| 111 | 6 | 0 | 1.579132  | 1.886411  | -2.811900 |
| 112 | 1 | 0 | 0.527688  | 2.167678  | -2.696868 |
| 113 | 6 | 0 | 2.217638  | 2.779997  | -3.887487 |
| 114 | 1 | 0 | 3.272742  | 2.512582  | -4.020025 |
| 115 | 1 | 0 | 1.710123  | 2.642075  | -4.848430 |
| 116 | 1 | 0 | 2.172510  | 3.840591  | -3.628207 |
| 117 | 6 | 0 | 1.609710  | 0.432151  | -3.289248 |
| 118 | 1 | 0 | 1.177280  | -0.239151 | -2.548359 |
| 119 | 1 | 0 | 1.035237  | 0.351142  | -4.219413 |
| 120 | 1 | 0 | 2.630701  | 0.097292  | -3.510108 |
| 121 | 6 | 0 | 5.575797  | 1.103730  | 0.162540  |
| 122 | 1 | 0 | 5.680398  | 0.325150  | -0.602920 |
| 123 | 6 | 0 | 6.707093  | 2.116877  | -0.049621 |
| 124 | 1 | 0 | 6.666558  | 2.908623  | 0.707586  |
| 125 | 1 | 0 | 7.683164  | 1.623626  | 0.022722  |
| 126 | 1 | 0 | 6.629362  | 2.588353  | -1.033938 |
| 127 | 6 | 0 | 5.704634  | 0.428626  | 1.530700  |
| 128 | 1 | 0 | 6.721027  | 0.041680  | 1.666246  |
| 129 | 1 | 0 | 5.497160  | 1.127581  | 2.348761  |
| 130 | 1 | 0 | 5.012982  | -0.414842 | 1.614725  |
| 131 | 6 | 0 | -4.339598 | -1.978237 | 2.234720  |
| 132 | 1 | 0 | -4.430896 | -0.907543 | 2.426548  |
| 133 | 6 | 0 | -3.154420 | -2.463582 | 3.071165  |
| 134 | 1 | 0 | -2.270466 | -1.881561 | 2.814283  |
| 135 | 1 | 0 | -3.359653 | -2.319620 | 4.137701  |
| 136 | 1 | 0 | -2.937174 | -3.525974 | 2.912656  |
| 137 | 6 | 0 | -5.635157 | -2.666031 | 2.686022  |
| 138 | 1 | 0 | -5.834136 | -2.455611 | 3.742268  |
| 139 | 1 | 0 | -6.497976 | -2.333783 | 2.100059  |
| 140 | 1 | 0 | -5.558448 | -3.752989 | 2.568124  |
| 141 | 6 | 0 | -4.096866 | -0.404055 | -2.688131 |
| 142 | 1 | 0 | -4.281372 | 0.574353  | -2.239847 |
| 143 | 6 | 0 | -2.773995 | -0.321371 | -3.461992 |
| 144 | 1 | 0 | -2.812780 | 0.493512  | -4.193074 |
| 145 | 1 | 0 | -1.931725 | -0.136163 | -2.788299 |
| 146 | 1 | 0 | -2.587059 | -1.249656 | -4.015917 |
| 147 | 6 | 0 | -5.268958 | -0.695403 | -3.634240 |
| 148 | 1 | 0 | -5.138783 | -1.655727 | -4.145204 |
| 149 | 1 | 0 | -6.216618 | -0.730862 | -3.088077 |
| 150 | 1 | 0 | -5.341549 | 0.083152  | -4.401068 |
| 151 | 6 | 0 | -3.407182 | -5.218133 | -1.513644 |
| 152 | 1 | 0 | -2.842132 | -5.135028 | -2.452621 |
| 153 | 6 | 0 | -2.561143 | -6.034658 | -0.535344 |
| 154 | 1 | 0 | -3.126745 | -6.278967 | 0.370665  |
| 155 | 1 | 0 | -2.257276 | -6.980476 | -0.995463 |
| 156 | 1 | 0 | -1.659338 | -5.488972 | -0.239763 |
| 157 | 6 | 0 | -4.728187 | -5.936852 | -1.818908 |
| 158 | 1 | 0 | -4.545550 | -6.946144 | -2.203509 |
| 159 | 1 | 0 | -5.329808 | -6.021311 | -0.906973 |
| 160 | 1 | 0 | -5.315957 | -5.384533 | -2.558199 |

M06-2X/6-31g(d) in gas phase  
SCF Done: E(RM062X) = -3617.184342 hartree  
Sum of electronic and thermal Free Energies = -3615.910534 hartree  
The number of imaginary frequency = 1  
Imaginary frequency = -411.53

| -----  |        |        |                         |           |           |
|--------|--------|--------|-------------------------|-----------|-----------|
| Center | Atomic | Atomic | Coordinates (Angstroms) |           |           |
| Number | Number | Type   | X                       | Y         | Z         |
| -----  |        |        |                         |           |           |
| 1      | 6      | 0      | -2.815435               | -2.034686 | 3.675663  |
| 2      | 1      | 0      | -1.836065               | -2.299139 | 3.291309  |
| 3      | 1      | 0      | -3.036872               | -2.418327 | 4.667735  |
| 4      | 6      | 0      | -3.865272               | -1.792788 | 2.807321  |
| 5      | 1      | 0      | -4.869083               | -1.778965 | 3.230043  |
| 6      | 6      | 0      | -3.752398               | -1.353636 | 1.475019  |
| 7      | 1      | 0      | -4.651239               | -1.006184 | 0.985930  |
| 8      | 6      | 0      | -2.548340               | -1.246819 | 0.811053  |
| 9      | 1      | 0      | -1.639510               | -1.665439 | 1.238591  |
| 10     | 1      | 0      | -1.311962               | -0.546386 | -0.661518 |
| 11     | 7      | 0      | -2.310929               | -0.644145 | -0.384335 |
| 12     | 6      | 0      | -3.211439               | -0.090402 | -1.278935 |
| 13     | 8      | 0      | -4.442123               | -0.630903 | -1.155173 |
| 14     | 8      | 0      | -2.908880               | 0.734527  | -2.104863 |
| 15     | 6      | 0      | -5.458594               | -0.047976 | -1.979659 |
| 16     | 1      | 0      | -5.026684               | 0.235636  | -2.940813 |
| 17     | 1      | 0      | -6.181517               | -0.854177 | -2.125139 |
| 18     | 6      | 0      | -6.099710               | 1.131612  | -1.294030 |
| 19     | 6      | 0      | -6.774002               | 0.948127  | -0.082599 |
| 20     | 6      | 0      | -6.045533               | 2.404117  | -1.857165 |
| 21     | 6      | 0      | -7.394095               | 2.019247  | 0.550838  |
| 22     | 1      | 0      | -6.821860               | -0.046981 | 0.354491  |
| 23     | 6      | 0      | -6.682814               | 3.477527  | -1.233851 |
| 24     | 1      | 0      | -5.494774               | 2.553466  | -2.782228 |
| 25     | 6      | 0      | -7.355952               | 3.287935  | -0.030384 |
| 26     | 1      | 0      | -7.920386               | 1.865790  | 1.487973  |
| 27     | 1      | 0      | -6.649394               | 4.463582  | -1.688425 |
| 28     | 1      | 0      | -7.852287               | 4.123381  | 0.453690  |
| 29     | 1      | 0      | -0.203141               | 1.267335  | 1.086054  |
| 30     | 6      | 0      | -2.150753               | 4.150880  | -2.136904 |
| 31     | 6      | 0      | -3.088687               | 3.898413  | -1.158926 |
| 32     | 6      | 0      | -2.775264               | 3.053756  | -0.076659 |
| 33     | 6      | 0      | -1.478204               | 2.508104  | 0.000727  |
| 34     | 6      | 0      | -0.520985               | 2.765456  | -0.991778 |
| 35     | 6      | 0      | -0.870263               | 3.572056  | -2.053039 |
| 36     | 1      | 0      | -4.727617               | 3.057474  | 0.877947  |
| 37     | 1      | 0      | -2.396119               | 4.795655  | -2.974572 |
| 38     | 1      | 0      | -4.080395               | 4.336937  | -1.206451 |
| 39     | 6      | 0      | -3.710344               | 2.676285  | 0.940132  |
| 40     | 1      | 0      | 0.472673                | 2.332140  | -0.907739 |
| 41     | 1      | 0      | -0.135529               | 3.768693  | -2.828009 |
| 42     | 6      | 0      | -2.020436               | 1.312251  | 2.024835  |
| 43     | 6      | 0      | -3.352004               | 1.842659  | 1.954235  |
| 44     | 1      | 0      | -4.071655               | 1.541401  | 2.706492  |
| 45     | 7      | 0      | -1.164380               | 1.685939  | 1.055500  |
| 46     | 6      | 0      | -1.522844               | 0.418049  | 3.013890  |
| 47     | 1      | 0      | -0.488569               | 0.107175  | 2.880735  |

R\_endo\_t-c

|     |    |   |           |           |           |     |   |   |           |           |           |
|-----|----|---|-----------|-----------|-----------|-----|---|---|-----------|-----------|-----------|
| 48  | 6  | 0 | -2.228113 | -0.074279 | 4.099656  | 105 | 1 | 0 | -0.858423 | -4.218676 | -4.815722 |
| 49  | 1  | 0 | -3.193531 | 0.342938  | 4.369871  | 106 | 1 | 0 | -0.586082 | -5.384874 | -3.505980 |
| 50  | 1  | 0 | -1.654924 | -0.446641 | 4.943401  | 107 | 6 | 0 | -1.495887 | -2.032228 | -3.258415 |
| 51  | 6  | 0 | 5.567744  | -3.311043 | -2.282261 | 108 | 1 | 0 | -1.393946 | -1.869319 | -4.337034 |
| 52  | 6  | 0 | 4.143286  | -3.617438 | -1.879458 | 109 | 1 | 0 | -2.567933 | -2.120322 | -3.040702 |
| 53  | 6  | 0 | 3.735489  | -2.766820 | -0.847804 | 110 | 1 | 0 | -1.096338 | -1.154164 | -2.748808 |
| 54  | 6  | 0 | 5.800875  | -1.938920 | -1.625042 | 111 | 6 | 0 | 0.889073  | -4.412043 | 1.916740  |
| 55  | 1  | 0 | 6.261202  | -4.065093 | -1.888275 | 112 | 1 | 0 | 1.859809  | -4.211996 | 1.459554  |
| 56  | 1  | 0 | 5.698235  | -3.290404 | -3.368383 | 113 | 6 | 0 | 0.910462  | -5.865371 | 2.406383  |
| 57  | 1  | 0 | 5.424042  | -1.145883 | -2.280966 | 114 | 1 | 0 | -0.028340 | -6.131899 | 2.904389  |
| 58  | 1  | 0 | 6.851852  | -1.728614 | -1.404510 | 115 | 1 | 0 | 1.056171  | -6.557018 | 1.571092  |
| 59  | 6  | 0 | 4.921661  | -1.971664 | -0.341955 | 116 | 1 | 0 | 1.724223  | -6.014976 | 3.123932  |
| 60  | 6  | 0 | 5.680856  | -2.720829 | 0.788888  | 117 | 6 | 0 | 0.728728  | -3.439886 | 3.090339  |
| 61  | 6  | 0 | 4.805429  | -0.593581 | 0.276146  | 118 | 1 | 0 | 1.577453  | -3.525856 | 3.777158  |
| 62  | 6  | 0 | 6.644452  | -1.665094 | 1.362878  | 119 | 1 | 0 | 0.686204  | -2.404318 | 2.734226  |
| 63  | 1  | 0 | 6.182625  | -3.623523 | 0.426876  | 120 | 1 | 0 | -0.179856 | -3.666376 | 3.661804  |
| 64  | 1  | 0 | 4.955368  | -3.016675 | 1.555173  | 121 | 6 | 0 | -3.977761 | -4.714790 | 0.752466  |
| 65  | 6  | 0 | 5.876043  | -0.379899 | 1.149961  | 122 | 1 | 0 | -4.125201 | -4.285382 | 1.752937  |
| 66  | 1  | 0 | 6.883071  | -1.836755 | 2.416851  | 123 | 6 | 0 | -4.098875 | -6.241003 | 0.872661  |
| 67  | 1  | 0 | 7.595553  | -1.653603 | 0.815437  | 124 | 1 | 0 | -5.094200 | -6.526162 | 1.230434  |
| 68  | 6  | 0 | 3.274430  | -4.565749 | -2.398628 | 125 | 1 | 0 | -3.938478 | -6.709405 | -0.104644 |
| 69  | 6  | 0 | 1.979879  | -4.632531 | -1.892545 | 126 | 1 | 0 | -3.354140 | -6.646480 | 1.564070  |
| 70  | 6  | 0 | 1.514349  | -3.735293 | -0.923753 | 127 | 6 | 0 | -5.073749 | -4.169152 | -0.162700 |
| 71  | 6  | 0 | 2.416632  | -2.791950 | -0.412396 | 128 | 1 | 0 | -5.058655 | -4.673486 | -1.135822 |
| 72  | 1  | 0 | 3.592502  | -5.242005 | -3.187064 | 129 | 1 | 0 | -6.058150 | -4.348014 | 0.281894  |
| 73  | 1  | 0 | 1.288426  | -5.379664 | -2.271442 | 130 | 1 | 0 | -4.955263 | -3.094450 | -0.335223 |
| 74  | 6  | 0 | 3.887883  | 0.422904  | 0.047999  | 131 | 6 | 0 | 2.584135  | 3.018282  | 2.799443  |
| 75  | 6  | 0 | 4.095712  | 1.704186  | 0.578721  | 132 | 1 | 0 | 3.098457  | 2.054059  | 2.817938  |
| 76  | 6  | 0 | 5.228510  | 1.910965  | 1.373173  | 133 | 6 | 0 | 1.220399  | 2.805317  | 3.462165  |
| 77  | 6  | 0 | 6.101602  | 0.874867  | 1.695659  | 134 | 1 | 0 | 1.357732  | 2.467752  | 4.495325  |
| 78  | 1  | 0 | 5.406034  | 2.908528  | 1.763551  | 135 | 1 | 0 | 0.626588  | 3.725635  | 3.492262  |
| 79  | 1  | 0 | 6.942706  | 1.051665  | 2.360139  | 136 | 1 | 0 | 0.659337  | 2.039872  | 2.927838  |
| 80  | 8  | 0 | 2.007485  | -1.895592 | 0.557114  | 137 | 6 | 0 | 3.399343  | 4.034168  | 3.612925  |
| 81  | 8  | 0 | 0.383050  | -0.575012 | -0.979023 | 138 | 1 | 0 | 3.537320  | 3.681468  | 4.640651  |
| 82  | 8  | 0 | 1.191509  | 0.347535  | 1.314059  | 139 | 1 | 0 | 4.386188  | 4.214850  | 3.177255  |
| 83  | 15 | 0 | 1.454837  | -0.432149 | 0.055641  | 140 | 1 | 0 | 2.877656  | 4.997480  | 3.654242  |
| 84  | 8  | 0 | 2.769442  | 0.170420  | -0.725860 | 141 | 6 | 0 | 3.750572  | 2.711243  | -2.215071 |
| 85  | 6  | 0 | 3.169088  | 2.841038  | 0.295333  | 142 | 1 | 0 | 4.335583  | 1.856060  | -1.868628 |
| 86  | 6  | 0 | 2.470975  | 3.469897  | 1.348502  | 143 | 6 | 0 | 2.729529  | 2.190084  | -3.234352 |
| 87  | 6  | 0 | 3.051689  | 3.341870  | -1.019130 | 144 | 1 | 0 | 3.240112  | 1.674387  | -4.054912 |
| 88  | 6  | 0 | 1.672556  | 4.580470  | 1.063716  | 145 | 1 | 0 | 2.033119  | 1.485674  | -2.769186 |
| 89  | 6  | 0 | 2.262671  | 4.470130  | -1.243011 | 146 | 1 | 0 | 2.157518  | 3.017574  | -3.672015 |
| 90  | 6  | 0 | 1.553768  | 5.098202  | -0.222642 | 147 | 6 | 0 | 4.728823  | 3.695346  | -2.867959 |
| 91  | 1  | 0 | 1.129633  | 5.053110  | 1.878351  | 148 | 1 | 0 | 4.205476  | 4.570044  | -3.269499 |
| 92  | 1  | 0 | 2.175779  | 4.863341  | -2.255843 | 149 | 1 | 0 | 5.470796  | 4.049321  | -2.145657 |
| 93  | 6  | 0 | 0.096258  | -3.836104 | -0.465112 | 150 | 1 | 0 | 5.257196  | 3.213591  | -3.697441 |
| 94  | 6  | 0 | -0.954513 | -3.681341 | -1.392827 | 151 | 6 | 0 | 0.693549  | 6.308960  | -0.530546 |
| 95  | 6  | 0 | -0.194476 | -4.204563 | 0.867648  | 152 | 1 | 0 | 0.388312  | 6.223756  | -1.582960 |
| 96  | 6  | 0 | -2.265609 | -3.941789 | -0.981328 | 153 | 6 | 0 | 1.511849  | 7.597855  | -0.377583 |
| 97  | 6  | 0 | -1.520339 | -4.447218 | 1.227793  | 154 | 1 | 0 | 0.910844  | 8.476796  | -0.634966 |
| 98  | 6  | 0 | -2.572144 | -4.342530 | 0.315251  | 155 | 1 | 0 | 1.851670  | 7.707028  | 0.658462  |
| 99  | 1  | 0 | -3.067119 | -3.823865 | -1.706146 | 156 | 1 | 0 | 2.396975  | 7.581879  | -1.020583 |
| 100 | 1  | 0 | -1.746440 | -4.751203 | 2.250420  | 157 | 6 | 0 | -0.579278 | 6.371441  | 0.316292  |
| 101 | 6  | 0 | -0.728229 | -3.294964 | -2.850910 | 158 | 1 | 0 | -1.243412 | 7.158308  | -0.055921 |
| 102 | 1  | 0 | 0.332817  | -3.074710 | -2.988444 | 159 | 1 | 0 | -1.120739 | 5.420338  | 0.288972  |
| 103 | 6  | 0 | -1.105862 | -4.460650 | -3.776841 | 160 | 1 | 0 | -0.349134 | 6.605738  | 1.361529  |
| 104 | 1  | 0 | -2.182131 | -4.662586 | -3.727659 |     |   |   |           |           |           |

**S\_endo\_t-c**  
 M06-2X/6-31g(d) in gas phase  
 SCF Done: E(RM062X) = -3617.183543 hartree  
 Sum of electronic and thermal Free Energies = -3615.910506 hartree  
 The number of imaginary frequency = 1  
 Imaginary frequency = -355.37

| Center Number | Atomic Number | Atomic Type | Coordinates (Angstroms) |           |           |
|---------------|---------------|-------------|-------------------------|-----------|-----------|
|               |               |             | X                       | Y         | Z         |
| 1             | 6             | 0           | 2.016499                | 0.713405  | 4.175635  |
| 2             | 1             | 0           | 1.075238                | 0.197839  | 4.010355  |
| 3             | 1             | 0           | 2.104637                | 1.203227  | 5.140835  |
| 4             | 6             | 0           | 3.165246                | 0.319210  | 3.518516  |
| 5             | 1             | 0           | 4.116434                | 0.681642  | 3.905137  |
| 6             | 6             | 0           | 3.208129                | -0.340049 | 2.268503  |
| 7             | 1             | 0           | 4.158396                | -0.416187 | 1.759068  |
| 8             | 6             | 0           | 2.047990                | -0.744331 | 1.650105  |
| 9             | 1             | 0           | 1.109903                | -0.741130 | 2.191685  |
| 10            | 1             | 0           | 0.880919                | -1.522045 | 0.216847  |
| 11            | 7             | 0           | 1.846974                | -1.233318 | 0.394468  |
| 12            | 6             | 0           | 2.681074                | -1.289643 | -0.700641 |
| 13            | 8             | 0           | 3.911353                | -0.816352 | -0.432221 |
| 14            | 8             | 0           | 2.337210                | -1.702711 | -1.782350 |
| 15            | 6             | 0           | 4.842928                | -0.948171 | -1.515801 |
| 16            | 1             | 0           | 4.926523                | -2.012492 | -1.765193 |
| 17            | 1             | 0           | 4.454066                | -0.427588 | -2.396530 |
| 18            | 6             | 0           | 6.161138                | -0.375929 | -1.069405 |
| 19            | 6             | 0           | 6.624311                | -0.565078 | 0.234538  |
| 20            | 6             | 0           | 6.958512                | 0.319197  | -1.978696 |
| 21            | 6             | 0           | 7.853547                | -0.044416 | 0.627298  |
| 22            | 1             | 0           | 6.021394                | -1.130950 | 0.939340  |
| 23            | 6             | 0           | 8.193253                | 0.833208  | -1.589703 |
| 24            | 1             | 0           | 6.604099                | 0.461227  | -2.996309 |
| 25            | 6             | 0           | 8.639706                | 0.659554  | -0.282570 |
| 26            | 1             | 0           | 8.201868                | -0.194306 | 1.644614  |
| 27            | 1             | 0           | 8.804252                | 1.372140  | -2.307457 |
| 28            | 1             | 0           | 9.598768                | 1.064719  | 0.024675  |
| 29            | 1             | 0           | 0.680109                | 1.192100  | -0.738545 |
| 30            | 6             | 0           | 4.033468                | 1.884649  | -4.014734 |
| 31            | 6             | 0           | 4.506134                | 2.359024  | -2.809378 |
| 32            | 6             | 0           | 3.730351                | 2.228838  | -1.640445 |
| 33            | 6             | 0           | 2.454256                | 1.637199  | -1.734654 |
| 34            | 6             | 0           | 1.985987                | 1.119708  | -2.958292 |
| 35            | 6             | 0           | 2.775358                | 1.251331  | -4.080768 |
| 36            | 1             | 0           | 5.176473                | 3.050408  | -0.242946 |
| 37            | 1             | 0           | 4.631614                | 1.989293  | -4.914233 |
| 38            | 1             | 0           | 5.483586                | 2.827850  | -2.736623 |
| 39            | 6             | 0           | 4.173044                | 2.644808  | -0.344360 |
| 40            | 1             | 0           | 1.018205                | 0.626728  | -2.984293 |
| 41            | 1             | 0           | 2.421231                | 0.858572  | -5.028179 |
| 42            | 6             | 0           | 2.037845                | 1.987410  | 0.608709  |
| 43            | 6             | 0           | 3.365434                | 2.522918  | 0.740041  |
| 44            | 1             | 0           | 3.706606                | 2.823456  | 1.723315  |
| 45            | 7             | 0           | 1.664151                | 1.561027  | -0.612356 |

|     |    |   |           |           |           |
|-----|----|---|-----------|-----------|-----------|
| 46  | 6  | 0 | 1.097233  | 1.895732  | 1.673016  |
| 47  | 1  | 0 | 0.127468  | 1.463817  | 1.436855  |
| 48  | 6  | 0 | 1.339337  | 2.341768  | 2.959041  |
| 49  | 1  | 0 | 2.177805  | 2.995112  | 3.179333  |
| 50  | 1  | 0 | 0.480390  | 2.475424  | 3.610267  |
| 51  | 6  | 0 | -6.187918 | -0.014659 | -3.060676 |
| 52  | 6  | 0 | -5.407682 | 0.999625  | -2.252191 |
| 53  | 6  | 0 | -4.672275 | 0.356839  | -1.252400 |
| 54  | 6  | 0 | -5.569329 | -1.351688 | -2.601253 |
| 55  | 1  | 0 | -7.260150 | 0.029707  | -2.832208 |
| 56  | 1  | 0 | -6.083684 | 0.150555  | -4.137351 |
| 57  | 1  | 0 | -4.674945 | -1.572764 | -3.193739 |
| 58  | 1  | 0 | -6.254383 | -2.200976 | -2.685507 |
| 59  | 6  | 0 | -5.136783 | -1.082962 | -1.134165 |
| 60  | 6  | 0 | -6.389487 | -1.159381 | -0.210801 |
| 61  | 6  | 0 | -4.297666 | -2.201337 | -0.535967 |
| 62  | 6  | 0 | -6.565755 | -2.658729 | 0.072832  |
| 63  | 1  | 0 | -7.267393 | -0.687425 | -0.661763 |
| 64  | 1  | 0 | -6.161873 | -0.632885 | 0.723020  |
| 65  | 6  | 0 | -5.134115 | -3.139243 | 0.078809  |
| 66  | 1  | 0 | -7.077385 | -2.858358 | 1.019051  |
| 67  | 1  | 0 | -7.146133 | -3.148995 | -0.719432 |
| 68  | 6  | 0 | -5.342402 | 2.378672  | -2.395771 |
| 69  | 6  | 0 | -4.491283 | 3.102659  | -1.562962 |
| 70  | 6  | 0 | -3.642825 | 2.472350  | -0.644839 |
| 71  | 6  | 0 | -3.750613 | 1.080343  | -0.508605 |
| 72  | 1  | 0 | -5.936237 | 2.889377  | -3.148675 |
| 73  | 1  | 0 | -4.437229 | 4.184156  | -1.655822 |
| 74  | 6  | 0 | -2.918815 | -2.392994 | -0.516739 |
| 75  | 6  | 0 | -2.363416 | -3.532098 | 0.088391  |
| 76  | 6  | 0 | -3.239265 | -4.488452 | 0.617675  |
| 77  | 6  | 0 | -4.617015 | -4.301257 | 0.631228  |
| 78  | 1  | 0 | -2.808923 | -5.383262 | 1.059081  |
| 79  | 1  | 0 | -5.269426 | -5.037810 | 1.091602  |
| 80  | 8  | 0 | -2.935165 | 0.422095  | 0.386990  |
| 81  | 8  | 0 | -0.838266 | 0.715725  | -1.116387 |
| 82  | 8  | 0 | -0.830659 | -0.754402 | 1.028535  |
| 83  | 15 | 0 | -1.539650 | -0.225969 | -0.175700 |
| 84  | 8  | 0 | -2.104884 | -1.447499 | -1.112047 |
| 85  | 6  | 0 | -0.892144 | -3.761831 | 0.246513  |
| 86  | 6  | 0 | -0.331172 | -3.781396 | 1.545246  |
| 87  | 6  | 0 | -0.090687 | -4.059790 | -0.872090 |
| 88  | 6  | 0 | 1.010572  | -4.132991 | 1.690818  |
| 89  | 6  | 0 | 1.252442  | -4.393416 | -0.671579 |
| 90  | 6  | 0 | 1.818124  | -4.449043 | 0.598364  |
| 91  | 1  | 0 | 1.436851  | -4.165592 | 2.692646  |
| 92  | 1  | 0 | 1.877626  | -4.618345 | -1.531320 |
| 93  | 6  | 0 | -2.625329 | 3.253769  | 0.122386  |
| 94  | 6  | 0 | -1.663661 | 4.021613  | -0.570283 |
| 95  | 6  | 0 | -2.619780 | 3.249648  | 1.535723  |
| 96  | 6  | 0 | -0.727383 | 4.762864  | 0.156902  |
| 97  | 6  | 0 | -1.672595 | 4.018541  | 2.210511  |
| 98  | 6  | 0 | -0.714361 | 4.779998  | 1.546842  |
| 99  | 1  | 0 | 0.010475  | 5.343763  | -0.391449 |
| 100 | 1  | 0 | -1.679914 | 4.027498  | 3.300612  |
| 101 | 6  | 0 | -1.586236 | 4.104027  | -2.090437 |
| 102 | 1  | 0 | -2.331299 | 3.430292  | -2.516328 |



|     |   |   |           |           |           |                                                            |        |        |                         |           |           |
|-----|---|---|-----------|-----------|-----------|------------------------------------------------------------|--------|--------|-------------------------|-----------|-----------|
| 103 | 6 | 0 | -0.231626 | 3.622907  | -2.613837 | 160                                                        | 1      | 0      | 2.766892                | -6.975996 | 1.062853  |
| 104 | 1 | 0 | -0.189305 | 3.711949  | -3.705248 | -----                                                      |        |        |                         |           |           |
| 105 | 1 | 0 | 0.605452  | 4.196935  | -2.198301 | <b>r-r_R_endo</b>                                          |        |        |                         |           |           |
| 106 | 1 | 0 | -0.108358 | 2.573602  | -2.347445 | M06-2X/6-31g(d) in gas phase                               |        |        |                         |           |           |
| 107 | 6 | 0 | -1.893920 | 5.525868  | -2.576876 | SCF Done: E(RM062X) = -3617.190876 hartree                 |        |        |                         |           |           |
| 108 | 1 | 0 | -1.901157 | 5.562789  | -3.671412 | Sum of electronic and thermal Free Energies = -3615.918406 |        |        |                         |           |           |
| 109 | 1 | 0 | -2.866080 | 5.875525  | -2.214113 | hartree                                                    |        |        |                         |           |           |
| 110 | 1 | 0 | -1.136679 | 6.234620  | -2.223043 | The number of imaginary frequency = 1                      |        |        |                         |           |           |
| 111 | 6 | 0 | -3.622564 | 2.475787  | 2.379887  | Imaginary frequency = -340.28                              |        |        |                         |           |           |
| 112 | 1 | 0 | -4.283339 | 1.914350  | 1.716514  | -----                                                      |        |        |                         |           |           |
| 113 | 6 | 0 | -4.504263 | 3.432308  | 3.193438  | Center                                                     | Atomic | Atomic | Coordinates (Angstroms) |           |           |
| 114 | 1 | 0 | -5.251033 | 2.869957  | 3.764085  | Number                                                     | Number | Type   | X                       | Y         | Z         |
| 115 | 1 | 0 | -3.908611 | 4.014437  | 3.905326  | -----                                                      |        |        |                         |           |           |
| 116 | 1 | 0 | -5.028474 | 4.136041  | 2.539569  | 1                                                          | 6      | 0      | -3.509480               | -2.825036 | -3.442878 |
| 117 | 6 | 0 | -2.914865 | 1.468066  | 3.295560  | 2                                                          | 1      | 0      | -3.552616               | -1.796900 | -3.096509 |
| 118 | 1 | 0 | -3.651027 | 0.854927  | 3.826610  | 3                                                          | 1      | 0      | -4.033838               | -3.022923 | -4.373693 |
| 119 | 1 | 0 | -2.266593 | 0.802213  | 2.717864  | 4                                                          | 6      | 0      | -3.305442               | -3.855687 | -2.550778 |
| 120 | 1 | 0 | -2.311813 | 1.984761  | 4.052798  | 5                                                          | 1      | 0      | -3.512836               | -4.868044 | -2.894011 |
| 121 | 6 | 0 | 0.261173  | 5.622609  | 2.346898  | 6                                                          | 6      | 0      | -2.665092               | -3.740454 | -1.296301 |
| 122 | 1 | 0 | 0.439390  | 5.094039  | 3.294410  | 7                                                          | 1      | 0      | -2.385515               | -4.643239 | -0.770413 |
| 123 | 6 | 0 | -0.367826 | 6.981813  | 2.682790  | 8                                                          | 6      | 0      | -2.283934               | -2.523836 | -0.776629 |
| 124 | 1 | 0 | 0.308069  | 7.586952  | 3.296842  | 9                                                          | 1      | 0      | -2.649573               | -1.592155 | -1.202217 |
| 125 | 1 | 0 | -0.581265 | 7.533726  | 1.760735  | 10                                                         | 1      | 0      | -1.305975               | -1.338232 | 0.613628  |
| 126 | 1 | 0 | -1.310337 | 6.856258  | 3.223790  | 11                                                         | 7      | 0      | -1.501108               | -2.314598 | 0.315511  |
| 127 | 6 | 0 | 1.611818  | 5.815029  | 1.656140  | 12                                                         | 6      | 0      | -0.782369               | -3.288750 | 0.977598  |
| 128 | 1 | 0 | 1.520076  | 6.465796  | 0.779817  | 13                                                         | 8      | 0      | -0.036664               | -2.700452 | 1.919372  |
| 129 | 1 | 0 | 2.324814  | 6.288511  | 2.339077  | 14                                                         | 8      | 0      | -0.794548               | -4.479299 | 0.755022  |
| 130 | 1 | 0 | 2.028417  | 4.859387  | 1.320661  | 15                                                         | 6      | 0      | 0.716512                | -3.575971 | 2.749975  |
| 131 | 6 | 0 | -1.140508 | -3.493468 | 2.806261  | 16                                                         | 1      | 0      | 0.023623                | -4.215450 | 3.310157  |
| 132 | 1 | 0 | -2.132361 | -3.145676 | 2.506762  | 17                                                         | 1      | 0      | 1.336491                | -4.225996 | 2.123228  |
| 133 | 6 | 0 | -0.530206 | -2.385567 | 3.675170  | 18                                                         | 6      | 0      | 1.558952                | -2.739821 | 3.676378  |
| 134 | 1 | 0 | -1.089319 | -2.299714 | 4.613735  | 19                                                         | 6      | 0      | 1.424973                | -1.352823 | 3.745861  |
| 135 | 1 | 0 | 0.515844  | -2.593990 | 3.932296  | 20                                                         | 6      | 0      | 2.499263                | -3.384858 | 4.482792  |
| 136 | 1 | 0 | -0.593157 | -1.431547 | 3.147155  | 21                                                         | 6      | 0      | 2.218394                | -0.628236 | 4.635308  |
| 137 | 6 | 0 | -1.305013 | -4.776118 | 3.634619  | 22                                                         | 1      | 0      | 0.719369                | -0.840087 | 3.096838  |
| 138 | 1 | 0 | -1.948800 | -4.593932 | 4.501621  | 23                                                         | 6      | 0      | 3.296798                | -2.656202 | 5.358372  |
| 139 | 1 | 0 | -1.743610 | -5.587247 | 3.045973  | 24                                                         | 1      | 0      | 2.609236                | -4.465788 | 4.419321  |
| 140 | 1 | 0 | -0.333799 | -5.125063 | 4.004233  | 25                                                         | 6      | 0      | 3.155656                | -1.271657 | 5.438390  |
| 141 | 6 | 0 | -0.696918 | -4.139221 | -2.266682 | 26                                                         | 1      | 0      | 2.105258                | 0.450355  | 4.689554  |
| 142 | 1 | 0 | -1.477570 | -3.376967 | -2.336395 | 27                                                         | 1      | 0      | 4.027022                | -3.167618 | 5.978365  |
| 143 | 6 | 0 | 0.302715  | -3.861514 | -3.391345 | 28                                                         | 1      | 0      | 3.774220                | -0.698600 | 6.122325  |
| 144 | 1 | 0 | -0.232858 | -3.774507 | -4.342231 | 29                                                         | 1      | 0      | 0.746272                | -1.138743 | -1.294812 |
| 145 | 1 | 0 | 0.857196  | -2.937640 | -3.210475 | 30                                                         | 6      | 0      | 3.761319                | -4.034424 | 0.964901  |
| 146 | 1 | 0 | 1.023091  | -4.680300 | -3.501796 | 31                                                         | 6      | 0      | 3.074607                | -4.774168 | 0.024244  |
| 147 | 6 | 0 | -1.350524 | -5.514731 | -2.464499 | 32                                                         | 6      | 0      | 2.104436                | -4.158677 | -0.793495 |
| 148 | 1 | 0 | -0.594985 | -6.305115 | -2.386827 | 33                                                         | 6      | 0      | 1.863905                | -2.777438 | -0.634277 |
| 149 | 1 | 0 | -2.121325 | -5.703835 | -1.711295 | 34                                                         | 6      | 0      | 2.563519                | -2.023030 | 0.324127  |
| 150 | 1 | 0 | -1.813932 | -5.581689 | -3.454916 | 35                                                         | 6      | 0      | 3.498904                | -2.656707 | 1.114025  |
| 151 | 6 | 0 | 3.263144  | -4.871275 | 0.791680  | 36                                                         | 1      | 0      | 1.505050                | -5.916041 | -1.918649 |
| 152 | 1 | 0 | 3.692045  | -5.034970 | -0.205799 | 37                                                         | 1      | 0      | 4.502521                | -4.510296 | 1.599019  |
| 153 | 6 | 0 | 4.094660  | -3.790071 | 1.491062  | 38                                                         | 1      | 0      | 3.265787                | -5.836577 | -0.098329 |
| 154 | 1 | 0 | 3.683032  | -3.551991 | 2.478357  | 39                                                         | 6      | 0      | 1.340298                | -4.850225 | -1.786330 |
| 155 | 1 | 0 | 5.128125  | -4.127568 | 1.628747  | 40                                                         | 1      | 0      | 2.360874                | -0.958260 | 0.423913  |
| 156 | 1 | 0 | 4.112138  | -2.862543 | 0.910475  | 41                                                         | 1      | 0      | 4.032563                | -2.081878 | 1.866172  |
| 157 | 6 | 0 | 3.344594  | -6.193850 | 1.563579  | 42                                                         | 6      | 0      | 0.185978                | -2.798177 | -2.362744 |
| 158 | 1 | 0 | 4.383149  | -6.530234 | 1.651979  | 43                                                         | 6      | 0      | 0.417902                | -4.201732 | -2.543762 |
| 159 | 1 | 0 | 2.941463  | -6.074899 | 2.575433  |                                                            |        |        |                         |           |           |

|     |    |   |           |           |           |     |   |   |           |           |           |
|-----|----|---|-----------|-----------|-----------|-----|---|---|-----------|-----------|-----------|
| 44  | 1  | 0 | -0.169772 | -4.733232 | -3.282054 | 101 | 6 | 0 | -3.541023 | -0.134117 | 2.953989  |
| 45  | 7  | 0 | 0.916166  | -2.171126 | -1.422512 | 102 | 1 | 0 | -2.983637 | 0.797151  | 3.076609  |
| 46  | 6  | 0 | -0.731511 | -2.008375 | -3.119571 | 103 | 6 | 0 | -4.732348 | -0.120930 | 3.923033  |
| 47  | 1  | 0 | -0.775004 | -0.954815 | -2.854217 | 104 | 1 | 0 | -5.271061 | -1.074945 | 3.888288  |
| 48  | 6  | 0 | -1.500010 | -2.475450 | -4.163906 | 105 | 1 | 0 | -4.386156 | 0.030359  | 4.950760  |
| 49  | 1  | 0 | -1.341020 | -3.463149 | -4.583827 | 106 | 1 | 0 | -5.450313 | 0.669099  | 3.682104  |
| 50  | 1  | 0 | -1.916999 | -1.750756 | -4.855820 | 107 | 6 | 0 | -2.578116 | -1.268095 | 3.318028  |
| 51  | 6  | 0 | -1.475428 | 5.782486  | 2.416360  | 108 | 1 | 0 | -2.337573 | -1.222620 | 4.386275  |
| 52  | 6  | 0 | -2.262677 | 4.555632  | 2.013406  | 109 | 1 | 0 | -3.010674 | -2.255954 | 3.116850  |
| 53  | 6  | 0 | -1.658382 | 3.928243  | 0.920817  | 110 | 1 | 0 | -1.648018 | -1.167469 | 2.759618  |
| 54  | 6  | 0 | -0.156656 | 5.594085  | 1.641876  | 111 | 6 | 0 | -4.225617 | 1.752994  | -1.801839 |
| 55  | 1  | 0 | -1.989947 | 6.702607  | 2.111515  | 112 | 1 | 0 | -3.712081 | 2.613573  | -1.368251 |
| 56  | 1  | 0 | -1.326648 | 5.842227  | 3.498712  | 113 | 6 | 0 | -5.584201 | 2.247727  | -2.312932 |
| 57  | 1  | 0 | 0.526493  | 4.961089  | 2.219101  | 114 | 1 | 0 | -6.143551 | 1.447974  | -2.810330 |
| 58  | 1  | 0 | 0.357467  | 6.533189  | 1.415469  | 115 | 1 | 0 | -6.198157 | 2.626530  | -1.490295 |
| 59  | 6  | 0 | -0.574082 | 4.823497  | 0.358110  | 116 | 1 | 0 | -5.444679 | 3.055678  | -3.038828 |
| 60  | 6  | 0 | -1.170403 | 5.823448  | -0.674025 | 117 | 6 | 0 | -3.358020 | 1.235078  | -2.955813 |
| 61  | 6  | 0 | 0.628500  | 4.317415  | -0.416862 | 118 | 1 | 0 | -3.181840 | 2.028174  | -3.690390 |
| 62  | 6  | 0 | 0.058993  | 6.442299  | -1.359182 | 119 | 1 | 0 | -2.385337 | 0.895268  | -2.584458 |
| 63  | 1  | 0 | -1.832400 | 6.558345  | -0.206184 | 120 | 1 | 0 | -3.858343 | 0.408350  | -3.476832 |
| 64  | 1  | 0 | -1.755085 | 5.255065  | -1.406278 | 121 | 6 | 0 | -6.150177 | -2.731645 | -0.445320 |
| 65  | 6  | 0 | 1.050286  | 5.302750  | -1.315257 | 122 | 1 | 0 | -5.484146 | -3.603757 | -0.370588 |
| 66  | 1  | 0 | -0.145024 | 6.777451  | -2.380548 | 123 | 6 | 0 | -6.767351 | -2.728439 | -1.843150 |
| 67  | 1  | 0 | 0.431056  | 7.311928  | -0.802519 | 124 | 1 | 0 | -7.342739 | -3.646355 | -1.998169 |
| 68  | 6  | 0 | -3.417303 | 4.030300  | 2.575027  | 125 | 1 | 0 | -7.452125 | -1.880764 | -1.963405 |
| 69  | 6  | 0 | -3.937845 | 2.850427  | 2.051232  | 126 | 1 | 0 | -6.007576 | -2.672566 | -2.627037 |
| 70  | 6  | 0 | -3.294933 | 2.142432  | 1.027850  | 127 | 6 | 0 | -7.268812 | -2.894276 | 0.595204  |
| 71  | 6  | 0 | -2.135641 | 2.703265  | 0.474567  | 128 | 1 | 0 | -7.950586 | -2.037891 | 0.550524  |
| 72  | 1  | 0 | -3.907655 | 4.523968  | 3.409260  | 129 | 1 | 0 | -7.847115 | -3.802345 | 0.395652  |
| 73  | 1  | 0 | -4.851131 | 2.433254  | 2.465410  | 130 | 1 | 0 | -6.880568 | -2.959092 | 1.614730  |
| 74  | 6  | 0 | 1.335668  | 3.122478  | -0.318418 | 131 | 6 | 0 | 2.799094  | 1.196506  | -3.440395 |
| 75  | 6  | 0 | 2.525628  | 2.940614  | -1.039304 | 132 | 1 | 0 | 2.045972  | 1.967618  | -3.257671 |
| 76  | 6  | 0 | 2.963258  | 3.985022  | -1.864049 | 133 | 6 | 0 | 2.062828  | -0.018969 | -4.008352 |
| 77  | 6  | 0 | 2.227113  | 5.152449  | -2.032919 | 134 | 1 | 0 | 1.554349  | 0.253285  | -4.939808 |
| 78  | 1  | 0 | 3.899721  | 3.853043  | -2.398039 | 135 | 1 | 0 | 2.743758  | -0.847368 | -4.234508 |
| 79  | 1  | 0 | 2.566672  | 5.924904  | -2.717084 | 136 | 1 | 0 | 1.311763  | -0.360409 | -3.298815 |
| 80  | 8  | 0 | -1.457206 | 2.044371  | -0.533729 | 137 | 6 | 0 | 3.804566  | 1.720639  | -4.476109 |
| 81  | 8  | 0 | -0.640095 | 0.197024  | 1.082430  | 138 | 1 | 0 | 3.292031  | 1.986463  | -5.406836 |
| 82  | 8  | 0 | 0.276267  | 0.443726  | -1.346385 | 139 | 1 | 0 | 4.343577  | 2.602470  | -4.119031 |
| 83  | 15 | 0 | -0.227838 | 1.059318  | -0.069193 | 140 | 1 | 0 | 4.549380  | 0.950928  | -4.709532 |
| 84  | 8  | 0 | 0.868072  | 2.127746  | 0.522940  | 141 | 6 | 0 | 4.006763  | 2.290282  | 1.424148  |
| 85  | 6  | 0 | 3.355208  | 1.697237  | -0.975419 | 142 | 1 | 0 | 2.976552  | 2.647078  | 1.510898  |
| 86  | 6  | 0 | 3.502214  | 0.894220  | -2.122799 | 143 | 6 | 0 | 4.338543  | 1.558109  | 2.725813  |
| 87  | 6  | 0 | 4.089537  | 1.397122  | 0.194032  | 144 | 1 | 0 | 4.082070  | 2.189051  | 3.583272  |
| 88  | 6  | 0 | 4.375348  | -0.198091 | -2.077475 | 145 | 1 | 0 | 3.778467  | 0.621635  | 2.812252  |
| 89  | 6  | 0 | 4.959990  | 0.309149  | 0.180291  | 146 | 1 | 0 | 5.407258  | 1.328294  | 2.802498  |
| 90  | 6  | 0 | 5.115374  | -0.504960 | -0.942448 | 147 | 6 | 0 | 4.926354  | 3.508041  | 1.254124  |
| 91  | 1  | 0 | 4.480553  | -0.816476 | -2.965066 | 148 | 1 | 0 | 5.967231  | 3.180983  | 1.149557  |
| 92  | 1  | 0 | 5.537375  | 0.072939  | 1.071768  | 149 | 1 | 0 | 4.659805  | 4.089616  | 0.366968  |
| 93  | 6  | 0 | -3.873461 | 0.838313  | 0.579168  | 150 | 1 | 0 | 4.860712  | 4.165085  | 2.128178  |
| 94  | 6  | 0 | -4.032730 | -0.214567 | 1.511760  | 151 | 6 | 0 | 6.092043  | -1.665194 | -0.898263 |
| 95  | 6  | 0 | -4.382051 | 0.687363  | -0.726203 | 152 | 1 | 0 | 6.093624  | -2.043253 | 0.133735  |
| 96  | 6  | 0 | -4.726920 | -1.358783 | 1.122126  | 153 | 6 | 0 | 7.510540  | -1.176526 | -1.221913 |
| 97  | 6  | 0 | -5.101206 | -0.469756 | -1.053873 | 154 | 1 | 0 | 8.232597  | -1.997494 | -1.154376 |
| 98  | 6  | 0 | -5.310197 | -1.498907 | -0.139399 | 155 | 1 | 0 | 7.545410  | -0.771778 | -2.239477 |
| 99  | 1  | 0 | -4.838026 | -2.166803 | 1.842790  | 156 | 1 | 0 | 7.821596  | -0.383766 | -0.535009 |
| 100 | 1  | 0 | -5.525596 | -0.546051 | -2.051576 | 157 | 6 | 0 | 5.698779  | -2.823114 | -1.816360 |

|     |   |   |          |           |           |
|-----|---|---|----------|-----------|-----------|
| 158 | 1 | 0 | 6.324386 | -3.698172 | -1.612925 |
| 159 | 1 | 0 | 4.651056 | -3.106473 | -1.672098 |
| 160 | 1 | 0 | 5.839518 | -2.558170 | -2.870207 |

r-r\_S\_endo2

M06-2X/6-31g(d) in gas phase

SCF Done: E(RM062X) = -3617.189831 hartree

Sum of electronic and thermal Free Energies = -3615.914482 hartree

The number of imaginary frequency = 1

Imaginary frequency = -348.89

| Center Number | Atomic Number | Atomic Type | Coordinates (Angstroms) |           |           |
|---------------|---------------|-------------|-------------------------|-----------|-----------|
|               |               |             | X                       | Y         | Z         |
| 1             | 6             | 0           | -0.334140               | -2.178769 | 4.405510  |
| 2             | 1             | 0           | 0.010955                | -1.182809 | 4.144766  |
| 3             | 1             | 0           | 0.087458                | -2.584775 | 5.320269  |
| 4             | 6             | 0           | -1.557540               | -2.643019 | 3.968326  |
| 5             | 1             | 0           | -1.963205               | -3.528169 | 4.455612  |
| 6             | 6             | 0           | -2.236649               | -2.197628 | 2.810168  |
| 7             | 1             | 0           | -3.083552               | -2.764354 | 2.447250  |
| 8             | 6             | 0           | -1.757255               | -1.139926 | 2.074729  |
| 9             | 1             | 0           | -0.975170               | -0.492229 | 2.452224  |
| 10            | 1             | 0           | -1.752060               | 0.144759  | 0.511769  |
| 11            | 7             | 0           | -2.187892               | -0.713981 | 0.853110  |
| 12            | 6             | 0           | -3.015658               | -1.423602 | 0.010729  |
| 13            | 8             | 0           | -3.181461               | -0.753465 | -1.137568 |
| 14            | 8             | 0           | -3.500600               | -2.507423 | 0.255431  |
| 15            | 6             | 0           | -4.024607               | -1.396151 | -2.113416 |
| 16            | 1             | 0           | -3.717948               | -0.945444 | -3.059791 |
| 17            | 1             | 0           | -3.797798               | -2.464658 | -2.129565 |
| 18            | 6             | 0           | -5.482057               | -1.148522 | -1.828928 |
| 19            | 6             | 0           | -6.065508               | 0.074517  | -2.168035 |
| 20            | 6             | 0           | -6.248788               | -2.114316 | -1.175367 |
| 21            | 6             | 0           | -7.391743               | 0.338507  | -1.838344 |
| 22            | 1             | 0           | -5.475544               | 0.824486  | -2.691055 |
| 23            | 6             | 0           | -7.577798               | -1.854702 | -0.851601 |
| 24            | 1             | 0           | -5.783942               | -3.054329 | -0.893908 |
| 25            | 6             | 0           | -8.147809               | -0.625711 | -1.173924 |
| 26            | 1             | 0           | -7.835643               | 1.294313  | -2.100136 |
| 27            | 1             | 0           | -8.165729               | -2.608415 | -0.336862 |
| 28            | 1             | 0           | -9.181274               | -0.419361 | -0.912938 |
| 29            | 1             | 0           | 0.275906                | -1.608609 | -0.667612 |
| 30            | 6             | 0           | -2.210972               | -4.205261 | -3.732314 |
| 31            | 6             | 0           | -2.164156               | -4.886796 | -2.534686 |
| 32            | 6             | 0           | -1.495993               | -4.332450 | -1.424527 |
| 33            | 6             | 0           | -0.889953               | -3.067968 | -1.560477 |
| 34            | 6             | 0           | -0.961145               | -2.357296 | -2.775216 |
| 35            | 6             | 0           | -1.604762               | -2.937894 | -3.847365 |
| 36            | 1             | 0           | -1.856414               | -5.954371 | -0.024588 |
| 37            | 1             | 0           | -2.717466               | -4.640563 | -4.587264 |
| 38            | 1             | 0           | -2.633650               | -5.860982 | -2.430293 |
| 39            | 6             | 0           | -1.383101               | -4.985114 | -0.155477 |
| 40            | 1             | 0           | -0.498775               | -1.375403 | -2.836162 |
| 41            | 1             | 0           | -1.652300               | -2.404657 | -4.791779 |

|    |    |   |           |           |           |
|----|----|---|-----------|-----------|-----------|
| 42 | 6  | 0 | -0.072484 | -3.130137 | 0.703533  |
| 43 | 6  | 0 | -0.706449 | -4.409055 | 0.869898  |
| 44 | 1  | 0 | -0.635445 | -4.898816 | 1.833549  |
| 45 | 7  | 0 | -0.210352 | -2.529527 | -0.493582 |
| 46 | 6  | 0 | 0.714483  | -2.481281 | 1.696393  |
| 47 | 1  | 0 | 1.137216  | -1.515125 | 1.429902  |
| 48 | 6  | 0 | 0.997204  | -3.013052 | 2.939903  |
| 49 | 1  | 0 | 0.789376  | -4.053371 | 3.170167  |
| 50 | 1  | 0 | 1.834289  | -2.587878 | 3.485683  |
| 51 | 6  | 0 | 4.330324  | 3.784399  | -3.450105 |
| 52 | 6  | 0 | 4.500702  | 2.498919  | -2.668715 |
| 53 | 6  | 0 | 3.649326  | 2.490934  | -1.559792 |
| 54 | 6  | 0 | 3.060942  | 4.393087  | -2.817247 |
| 55 | 1  | 0 | 5.196150  | 4.446981  | -3.327824 |
| 56 | 1  | 0 | 4.219385  | 3.599320  | -4.522905 |
| 57 | 1  | 0 | 2.167840  | 3.987707  | -3.304912 |
| 58 | 1  | 0 | 3.021989  | 5.484830  | -2.882829 |
| 59 | 6  | 0 | 3.095826  | 3.888731  | -1.349899 |
| 60 | 6  | 0 | 4.122688  | 4.741089  | -0.543605 |
| 61 | 6  | 0 | 1.830227  | 4.189118  | -0.564166 |
| 62 | 6  | 0 | 3.337801  | 5.993262  | -0.125716 |
| 63 | 1  | 0 | 5.027467  | 4.956495  | -1.119376 |
| 64 | 1  | 0 | 4.414254  | 4.176068  | 0.348993  |
| 65 | 6  | 0 | 1.950740  | 5.430210  | 0.070949  |
| 66 | 1  | 0 | 3.731127  | 6.462949  | 0.780671  |
| 67 | 1  | 0 | 3.350015  | 6.753814  | -0.917142 |
| 68 | 6  | 0 | 5.334702  | 1.419048  | -2.922670 |
| 69 | 6  | 0 | 5.270128  | 0.308459  | -2.083736 |
| 70 | 6  | 0 | 4.327514  | 0.214342  | -1.052669 |
| 71 | 6  | 0 | 3.509002  | 1.328544  | -0.813187 |
| 72 | 1  | 0 | 6.024376  | 1.432234  | -3.762015 |
| 73 | 1  | 0 | 5.928803  | -0.538352 | -2.257723 |
| 74 | 6  | 0 | 0.669800  | 3.440761  | -0.392752 |
| 75 | 6  | 0 | -0.378463 | 3.921731  | 0.407098  |
| 76 | 6  | 0 | -0.256641 | 5.205135  | 0.952560  |
| 77 | 6  | 0 | 0.899427  | 5.962893  | 0.801489  |
| 78 | 1  | 0 | -1.084526 | 5.588533  | 1.542173  |
| 79 | 1  | 0 | 0.987159  | 6.936400  | 1.275500  |
| 80 | 8  | 0 | 2.563106  | 1.268084  | 0.188454  |
| 81 | 8  | 0 | 0.992649  | -0.235518 | -1.238469 |
| 82 | 8  | 0 | 0.286090  | 0.722177  | 1.068199  |
| 83 | 15 | 0 | 1.024550  | 0.873133  | -0.220560 |
| 84 | 8  | 0 | 0.556832  | 2.220561  | -1.030282 |
| 85 | 6  | 0 | -1.589348 | 3.120412  | 0.763814  |
| 86 | 6  | 0 | -1.801705 | 2.779802  | 2.118810  |
| 87 | 6  | 0 | -2.559295 | 2.792913  | -0.202161 |
| 88 | 6  | 0 | -3.019433 | 2.204509  | 2.480300  |
| 89 | 6  | 0 | -3.752399 | 2.187197  | 0.208799  |
| 90 | 6  | 0 | -4.021395 | 1.928946  | 1.552461  |
| 91 | 1  | 0 | -3.205839 | 1.975164  | 3.528613  |
| 92 | 1  | 0 | -4.502111 | 1.937814  | -0.541093 |
| 93 | 6  | 0 | 4.176806  | -1.049758 | -0.269288 |
| 94 | 6  | 0 | 3.904670  | -2.261818 | -0.941140 |
| 95 | 6  | 0 | 4.330128  | -1.057790 | 1.136177  |
| 96 | 6  | 0 | 3.789634  | -3.442915 | -0.202172 |
| 97 | 6  | 0 | 4.221757  | -2.267312 | 1.821217  |
| 98 | 6  | 0 | 3.945879  | -3.471146 | 1.178645  |

99 1 0 3.570077 -4.366159 -0.733152  
100 1 0 4.356190 -2.274473 2.903001  
101 6 0 3.723967 -2.367744 -2.450941  
102 1 0 3.785787 -1.367836 -2.882963  
103 6 0 2.334695 -2.897806 -2.808922  
104 1 0 2.222628 -2.981003 -3.895863  
105 1 0 2.138977 -3.885482 -2.374287  
106 1 0 1.589822 -2.194618 -2.437759  
107 6 0 4.826987 -3.228472 -3.078903  
108 1 0 4.723154 -3.247283 -4.168965  
109 1 0 5.824290 -2.848023 -2.834688  
110 1 0 4.772326 -4.262348 -2.719939  
111 6 0 4.643875 0.184531 1.958291  
112 1 0 4.689743 1.047335 1.290918  
113 6 0 6.015928 0.062047 2.633973  
114 1 0 6.251438 0.978060 3.186169  
115 1 0 6.037186 -0.771090 3.345155  
116 1 0 6.804870 -0.107054 1.894710  
117 6 0 3.543432 0.453597 2.993881  
118 1 0 3.732511 1.399174 3.513750  
119 1 0 2.562068 0.517205 2.513912  
120 1 0 3.518868 -0.338521 3.753000  
121 6 0 3.868594 -4.755605 1.981921  
122 1 0 3.517657 -4.484755 2.987979  
123 6 0 5.265680 -5.374396 2.126356  
124 1 0 5.232115 -6.282377 2.738291  
125 1 0 5.661957 -5.639409 1.139893  
126 1 0 5.962283 -4.668998 2.588905  
127 6 0 2.888062 -5.776709 1.402312  
128 1 0 3.265756 -6.202133 0.466273  
129 1 0 2.744626 -6.606844 2.101712  
130 1 0 1.914475 -5.320612 1.193180  
131 6 0 -0.777970 3.046302 3.217762  
132 1 0 0.135360 3.427320 2.753930  
133 6 0 -0.387648 1.768459 3.972670  
134 1 0 0.294526 2.014027 4.794557  
135 1 0 -1.261737 1.266030 4.405264  
136 1 0 0.123259 1.085447 3.289947  
137 6 0 -1.295555 4.103256 4.203208  
138 1 0 -0.531465 4.334625 4.952822  
139 1 0 -1.569139 5.032865 3.695338  
140 1 0 -2.184611 3.740697 4.731526  
141 6 0 -2.379898 3.151239 -1.670600  
142 1 0 -1.426042 3.673383 -1.780825  
143 6 0 -2.326204 1.905469 -2.559169  
144 1 0 -2.141805 2.191922 -3.600529  
145 1 0 -1.531066 1.225111 -2.239056  
146 1 0 -3.277165 1.363593 -2.515989  
147 6 0 -3.483311 4.106884 -2.141573  
148 1 0 -4.468616 3.628628 -2.093293  
149 1 0 -3.517051 5.006384 -1.519345  
150 1 0 -3.309242 4.410889 -3.179272  
151 6 0 -5.352982 1.364712 2.012925  
152 1 0 -5.387053 1.474097 3.104877  
153 6 0 -6.536470 2.139463 1.425356  
154 1 0 -6.583004 2.012747 0.338398  
155 1 0 -7.479646 1.766088 1.838451

156 1 0 -6.459171 3.208945 1.642776  
157 6 0 -5.467462 -0.123789 1.677641  
158 1 0 -6.432002 -0.528452 2.004197  
159 1 0 -5.399156 -0.267820 0.594567  
160 1 0 -4.669928 -0.703310 2.154666

-----  
**r-l\_R\_endo**

M06-2X/6-31g(d) in gas phase

SCF Done: E(RM062X) = -3617.188702 hartree

Sum of electronic and thermal Free Energies = -3615.916591 hartree

The number of imaginary frequency = 1

Imaginary frequency = -346.93  
-----

| Center Number | Atomic Number | Atomic Type | Coordinates (Angstroms) |           |           |
|---------------|---------------|-------------|-------------------------|-----------|-----------|
|               |               |             | X                       | Y         | Z         |
| 1             | 6             | 0           | -3.590314               | -2.846484 | -3.436725 |
| 2             | 1             | 0           | -3.633982               | -1.818386 | -3.089471 |
| 3             | 1             | 0           | -4.124387               | -3.044848 | -4.361896 |
| 4             | 6             | 0           | -3.379711               | -3.877247 | -2.545427 |
| 5             | 1             | 0           | -3.589362               | -4.889661 | -2.886804 |
| 6             | 6             | 0           | -2.727098               | -3.760878 | -1.297982 |
| 7             | 1             | 0           | -2.440639               | -4.663102 | -0.774850 |
| 8             | 6             | 0           | -2.342959               | -2.543134 | -0.782361 |
| 9             | 1             | 0           | -2.715985               | -1.612312 | -1.203103 |
| 10            | 1             | 0           | -1.357574               | -1.357302 | 0.601870  |
| 11            | 7             | 0           | -1.552388               | -2.333030 | 0.304095  |
| 12            | 6             | 0           | -0.814653               | -3.304920 | 0.949540  |
| 13            | 8             | 0           | -0.083015               | -2.719245 | 1.903196  |
| 14            | 8             | 0           | -0.802596               | -4.490849 | 0.704145  |
| 15            | 6             | 0           | 0.700915                | -3.590312 | 2.709229  |
| 16            | 1             | 0           | 0.031336                | -4.254169 | 3.269237  |
| 17            | 1             | 0           | 1.326418                | -4.216137 | 2.063219  |
| 18            | 6             | 0           | 1.538258                | -2.748458 | 3.635485  |
| 19            | 6             | 0           | 1.411359                | -1.359932 | 3.688037  |
| 20            | 6             | 0           | 2.473639                | -3.388567 | 4.451339  |
| 21            | 6             | 0           | 2.208438                | -0.628572 | 4.568555  |
| 22            | 1             | 0           | 0.709171                | -0.851156 | 3.032104  |
| 23            | 6             | 0           | 3.275124                | -2.653215 | 5.317778  |
| 24            | 1             | 0           | 2.577527                | -4.470832 | 4.402167  |
| 25            | 6             | 0           | 3.142228                | -1.266934 | 5.379788  |
| 26            | 1             | 0           | 2.101331                | 0.451284  | 4.608661  |
| 27            | 1             | 0           | 4.001888                | -3.160893 | 5.944854  |
| 28            | 1             | 0           | 3.764236                | -0.688684 | 6.056206  |
| 29            | 1             | 0           | 0.661003                | -1.131008 | -1.325297 |
| 30            | 6             | 0           | 3.753934                | -3.963255 | 0.899877  |
| 31            | 6             | 0           | 3.093819                | -4.710798 | -0.053451 |
| 32            | 6             | 0           | 2.096351                | -4.118017 | -0.855046 |
| 33            | 6             | 0           | 1.810380                | -2.748642 | -0.673886 |
| 34            | 6             | 0           | 2.482486                | -1.985647 | 0.297095  |
| 35            | 6             | 0           | 3.437646                | -2.599946 | 1.077007  |
| 36            | 1             | 0           | 1.538110                | -5.881018 | -1.992177 |
| 37            | 1             | 0           | 4.514306                | -4.421845 | 1.524333  |
| 38            | 1             | 0           | 3.322002                | -5.763770 | -0.193221 |
| 39            | 6             | 0           | 1.341328                | -4.822469 | -1.845597 |

|    |    |   |           |           |           |     |   |   |           |           |           |
|----|----|---|-----------|-----------|-----------|-----|---|---|-----------|-----------|-----------|
| 40 | 1  | 0 | 2.243958  | -0.930097 | 0.415188  | 97  | 6 | 0 | -5.128037 | -0.424613 | -1.015020 |
| 41 | 1  | 0 | 3.943962  | -2.021397 | 1.844837  | 98  | 6 | 0 | -5.341307 | -1.451723 | -0.099328 |
| 42 | 6  | 0 | 0.119911  | -2.801321 | -2.389281 | 99  | 1 | 0 | -4.860968 | -2.124830 | 1.879093  |
| 43 | 6  | 0 | 0.386906  | -4.196620 | -2.582934 | 100 | 1 | 0 | -5.559498 | -0.496716 | -2.009997 |
| 44 | 1  | 0 | -0.193653 | -4.739136 | -3.318876 | 101 | 6 | 0 | -3.533214 | -0.107914 | 2.980255  |
| 45 | 7  | 0 | 0.842301  | -2.163018 | -1.451436 | 102 | 1 | 0 | -2.964830 | 0.817081  | 3.099443  |
| 46 | 6  | 0 | -0.818208 | -2.024792 | -3.134936 | 103 | 6 | 0 | -4.713919 | -0.084604 | 3.961882  |
| 47 | 1  | 0 | -0.869691 | -0.971226 | -2.870488 | 104 | 1 | 0 | -5.263967 | -1.032197 | 3.929521  |
| 48 | 6  | 0 | -1.593401 | -2.498925 | -4.171719 | 105 | 1 | 0 | -4.355136 | 0.058910  | 4.986399  |
| 49 | 1  | 0 | -1.431003 | -3.486923 | -4.589906 | 106 | 1 | 0 | -5.425192 | 0.714573  | 3.731436  |
| 50 | 1  | 0 | -2.016469 | -1.778437 | -4.864345 | 107 | 6 | 0 | -2.578265 | -1.252799 | 3.330168  |
| 51 | 6  | 0 | -1.387959 | 5.770391  | 2.450594  | 108 | 1 | 0 | -2.320114 | -1.209564 | 4.394384  |
| 52 | 6  | 0 | -2.200068 | 4.559989  | 2.047011  | 109 | 1 | 0 | -3.025409 | -2.235594 | 3.136568  |
| 53 | 6  | 0 | -1.616632 | 3.930379  | 0.944592  | 110 | 1 | 0 | -1.656133 | -1.164087 | 2.756751  |
| 54 | 6  | 0 | -0.079786 | 5.564802  | 1.662187  | 111 | 6 | 0 | -4.234942 | 1.787820  | -1.770594 |
| 55 | 1  | 0 | -1.889396 | 6.701286  | 2.156911  | 112 | 1 | 0 | -3.711081 | 2.644460  | -1.341462 |
| 56 | 1  | 0 | -1.227863 | 5.820147  | 3.531833  | 113 | 6 | 0 | -5.591532 | 2.294109  | -2.275763 |
| 57 | 1  | 0 | 0.597790  | 4.916334  | 2.228679  | 114 | 1 | 0 | -6.160146 | 1.499155  | -2.770318 |
| 58 | 1  | 0 | 0.448104  | 6.496635  | 1.437439  | 115 | 1 | 0 | -6.198534 | 2.678739  | -1.450668 |
| 59 | 6  | 0 | -0.522164 | 4.810448  | 0.377097  | 116 | 1 | 0 | -5.448119 | 3.100393  | -3.002730 |
| 60 | 6  | 0 | -1.112011 | 5.827630  | -0.641906 | 117 | 6 | 0 | -3.378335 | 1.258589  | -2.927803 |
| 61 | 6  | 0 | 0.664313  | 4.289856  | -0.414306 | 118 | 1 | 0 | -3.205796 | 2.045655  | -3.669715 |
| 62 | 6  | 0 | 0.120428  | 6.431204  | -1.334960 | 119 | 1 | 0 | -2.403802 | 0.918406  | -2.562059 |
| 63 | 1  | 0 | -1.757112 | 6.569820  | -0.162146 | 120 | 1 | 0 | -3.885373 | 0.429303  | -3.438372 |
| 64 | 1  | 0 | -1.713248 | 5.274346  | -1.372288 | 121 | 6 | 0 | -6.195137 | -2.676279 | -0.399820 |
| 65 | 6  | 0 | 1.092802  | 5.274957  | -1.310012 | 122 | 1 | 0 | -5.537163 | -3.554822 | -0.329875 |
| 66 | 1  | 0 | -0.088355 | 6.777708  | -2.351556 | 123 | 6 | 0 | -6.821528 | -2.666700 | -1.793492 |
| 67 | 1  | 0 | 0.512686  | 7.290078  | -0.775461 | 124 | 1 | 0 | -7.407287 | -3.578668 | -1.944621 |
| 68 | 6  | 0 | -3.358133 | 4.049325  | 2.615480  | 125 | 1 | 0 | -7.498263 | -1.811986 | -1.909326 |
| 69 | 6  | 0 | -3.901941 | 2.880686  | 2.089876  | 126 | 1 | 0 | -6.066600 | -2.619022 | -2.582569 |
| 70 | 6  | 0 | -3.279967 | 2.168744  | 1.056201  | 127 | 6 | 0 | -7.308246 | -2.828104 | 0.648184  |
| 71 | 6  | 0 | -2.118565 | 2.716841  | 0.494970  | 128 | 1 | 0 | -7.981991 | -1.965162 | 0.607970  |
| 72 | 1  | 0 | -3.832993 | 4.545203  | 3.457339  | 129 | 1 | 0 | -7.896624 | -3.730559 | 0.452671  |
| 73 | 1  | 0 | -4.817046 | 2.474877  | 2.511281  | 130 | 1 | 0 | -6.913770 | -2.896544 | 1.665079  |
| 74 | 6  | 0 | 1.353453  | 3.082999  | -0.333030 | 131 | 6 | 0 | 2.721429  | 1.131620  | -3.472149 |
| 75 | 6  | 0 | 2.532365  | 2.886726  | -1.068458 | 132 | 1 | 0 | 1.975211  | 1.904371  | -3.268464 |
| 76 | 6  | 0 | 2.978117  | 3.930343  | -1.889584 | 133 | 6 | 0 | 1.971473  | -0.072036 | -4.045252 |
| 77 | 6  | 0 | 2.259066  | 5.110885  | -2.041528 | 134 | 1 | 0 | 1.459698  | 0.213294  | -4.970951 |
| 78 | 1  | 0 | 3.907183  | 3.788378  | -2.433702 | 135 | 1 | 0 | 2.643240  | -0.904340 | -4.284182 |
| 79 | 1  | 0 | 2.603914  | 5.883117  | -2.723296 | 136 | 1 | 0 | 1.221430  | -0.413063 | -3.335271 |
| 80 | 8  | 0 | -1.461290 | 2.056547  | -0.525659 | 137 | 6 | 0 | 3.714564  | 1.661519  | -4.517411 |
| 81 | 8  | 0 | -0.651261 | 0.173765  | 1.055771  | 138 | 1 | 0 | 3.189738  | 1.942095  | -5.436916 |
| 82 | 8  | 0 | 0.235650  | 0.445841  | -1.381259 | 139 | 1 | 0 | 4.266097  | 2.534733  | -4.158777 |
| 83 | 15 | 0 | -0.242969 | 1.048375  | -0.087830 | 140 | 1 | 0 | 4.449785  | 0.888490  | -4.770309 |
| 84 | 8  | 0 | 0.878712  | 2.088982  | 0.505620  | 141 | 6 | 0 | 4.073012  | 2.226385  | 1.350255  |
| 85 | 6  | 0 | 3.346340  | 1.631201  | -1.022240 | 142 | 1 | 0 | 3.053463  | 2.610538  | 1.447434  |
| 86 | 6  | 0 | 3.448440  | 0.816654  | -2.170490 | 143 | 6 | 0 | 4.395484  | 1.482119  | 2.647825  |
| 87 | 6  | 0 | 4.117743  | 1.333170  | 0.117999  | 144 | 1 | 0 | 4.163371  | 2.117506  | 3.509051  |
| 88 | 6  | 0 | 4.313330  | -0.277106 | -2.140622 | 145 | 1 | 0 | 3.809346  | 0.561916  | 2.736742  |
| 89 | 6  | 0 | 5.000581  | 0.249526  | 0.080922  | 146 | 1 | 0 | 5.457669  | 1.221746  | 2.716686  |
| 90 | 6  | 0 | 5.115163  | -0.570832 | -1.038491 | 147 | 6 | 0 | 5.021949  | 3.419910  | 1.172902  |
| 91 | 1  | 0 | 4.379620  | -0.915425 | -3.019796 | 148 | 1 | 0 | 6.052747  | 3.066529  | 1.054740  |
| 92 | 1  | 0 | 5.608328  | 0.043332  | 0.955728  | 149 | 1 | 0 | 4.759396  | 4.009551  | 0.289732  |
| 93 | 6  | 0 | -3.877341 | 0.872080  | 0.609808  | 150 | 1 | 0 | 4.984181  | 4.076873  | 2.048702  |
| 94 | 6  | 0 | -4.039758 | -0.180198 | 1.542805  | 151 | 6 | 0 | 6.058807  | -1.763692 | -1.104142 |
| 95 | 6  | 0 | -4.395532 | 0.725611  | -0.692269 | 152 | 1 | 0 | 5.437993  | -2.649314 | -1.308784 |
| 96 | 6  | 0 | -4.747646 | -1.317586 | 1.157941  | 153 | 6 | 0 | 6.828269  | -2.022940 | 0.190189  |

|     |   |   |          |           |           |
|-----|---|---|----------|-----------|-----------|
| 154 | 1 | 0 | 7.446672 | -2.919640 | 0.084096  |
| 155 | 1 | 0 | 7.494694 | -1.184239 | 0.422389  |
| 156 | 1 | 0 | 6.161796 | -2.172493 | 1.044338  |
| 157 | 6 | 0 | 7.056075 | -1.602675 | -2.261086 |
| 158 | 1 | 0 | 7.700410 | -2.484552 | -2.340666 |
| 159 | 1 | 0 | 6.551844 | -1.462953 | -3.220867 |
| 160 | 1 | 0 | 7.692743 | -0.728181 | -2.087884 |

-----

**r-l\_S\_endo2**

M06-2X/6-31g(d) in gas phase

SCF Done: E(RM062X) = -3617.187002 hartree

Sum of electronic and thermal Free Energies = -3615.911926 hartree

The number of imaginary frequency = 1

Imaginary frequency = -348.44

-----

| Center Number | Atomic Number | Atomic Type | Coordinates (Angstroms) |   |   |
|---------------|---------------|-------------|-------------------------|---|---|
|               |               |             | X                       | Y | Z |

-----

|    |   |   |           |           |           |
|----|---|---|-----------|-----------|-----------|
| 1  | 6 | 0 | -0.403777 | -1.966393 | 4.486777  |
| 2  | 1 | 0 | -0.103454 | -0.965143 | 4.194471  |
| 3  | 1 | 0 | 0.009926  | -2.312588 | 5.429328  |
| 4  | 6 | 0 | -1.586003 | -2.514133 | 4.033455  |
| 5  | 1 | 0 | -1.960880 | -3.398485 | 4.546217  |
| 6  | 6 | 0 | -2.249256 | -2.153001 | 2.836971  |
| 7  | 1 | 0 | -3.057246 | -2.773983 | 2.473997  |
| 8  | 6 | 0 | -1.794283 | -1.105153 | 2.073374  |
| 9  | 1 | 0 | -1.048433 | -0.413054 | 2.444420  |
| 10 | 1 | 0 | -1.800903 | 0.120621  | 0.462995  |
| 11 | 7 | 0 | -2.206305 | -0.743943 | 0.824820  |
| 12 | 6 | 0 | -2.997007 | -1.506921 | -0.006334 |
| 13 | 8 | 0 | -3.166014 | -0.877163 | -1.177188 |
| 14 | 8 | 0 | -3.449903 | -2.598081 | 0.264959  |
| 15 | 6 | 0 | -3.973310 | -1.573746 | -2.145614 |
| 16 | 1 | 0 | -3.657236 | -1.150141 | -3.101592 |
| 17 | 1 | 0 | -3.722703 | -2.636540 | -2.118205 |
| 18 | 6 | 0 | -5.440956 | -1.349270 | -1.899200 |
| 19 | 6 | 0 | -6.040120 | -0.146641 | -2.281058 |
| 20 | 6 | 0 | -6.202251 | -2.314285 | -1.238570 |
| 21 | 6 | 0 | -7.378691 | 0.097573  | -1.988461 |
| 22 | 1 | 0 | -5.452307 | 0.602698  | -2.807577 |
| 23 | 6 | 0 | -7.543449 | -2.074398 | -0.951542 |
| 24 | 1 | 0 | -5.724778 | -3.237048 | -0.922745 |
| 25 | 6 | 0 | -8.130437 | -0.865925 | -1.317851 |
| 26 | 1 | 0 | -7.835698 | 1.037409  | -2.283453 |
| 27 | 1 | 0 | -8.127796 | -2.827032 | -0.431172 |
| 28 | 1 | 0 | -9.173695 | -0.674768 | -1.085856 |
| 29 | 1 | 0 | 0.302366  | -1.605354 | -0.590500 |
| 30 | 6 | 0 | -2.027636 | -4.461022 | -3.546915 |
| 31 | 6 | 0 | -1.946863 | -5.087914 | -2.321710 |
| 32 | 6 | 0 | -1.314238 | -4.451203 | -1.235283 |
| 33 | 6 | 0 | -0.777835 | -3.161958 | -1.423467 |
| 34 | 6 | 0 | -0.892598 | -2.504908 | -2.664641 |
| 35 | 6 | 0 | -1.497054 | -3.165724 | -3.712814 |
| 36 | 1 | 0 | -1.592974 | -6.029368 | 0.231088  |
| 37 | 1 | 0 | -2.505120 | -4.959642 | -4.383786 |

|    |    |   |           |           |           |
|----|----|---|-----------|-----------|-----------|
| 38 | 1  | 0 | -2.361722 | -6.081497 | -2.176703 |
| 39 | 6  | 0 | -1.174417 | -5.041114 | 0.061111  |
| 40 | 1  | 0 | -0.495484 | -1.498044 | -2.764219 |
| 41 | 1  | 0 | -1.575328 | -2.673615 | -4.677366 |
| 42 | 6  | 0 | 0.022262  | -3.079752 | 0.846812  |
| 43 | 6  | 0 | -0.539234 | -4.384211 | 1.064264  |
| 44 | 1  | 0 | -0.448757 | -4.827394 | 2.048505  |
| 45 | 7  | 0 | -0.131250 | -2.543288 | -0.379539 |
| 46 | 6  | 0 | 0.749596  | -2.341755 | 1.822567  |
| 47 | 1  | 0 | 1.122533  | -1.367826 | 1.517720  |
| 48 | 6  | 0 | 1.013689  | -2.789550 | 3.102678  |
| 49 | 1  | 0 | 0.845644  | -3.822847 | 3.384209  |
| 50 | 1  | 0 | 1.810250  | -2.297035 | 3.652401  |
| 51 | 6  | 0 | 4.262453  | 3.992437  | -3.334960 |
| 52 | 6  | 0 | 4.446279  | 2.680443  | -2.603956 |
| 53 | 6  | 0 | 3.585928  | 2.609799  | -1.503788 |
| 54 | 6  | 0 | 2.973764  | 4.548203  | -2.696427 |
| 55 | 1  | 0 | 5.113238  | 4.665811  | -3.172290 |
| 56 | 1  | 0 | 4.171038  | 3.849034  | -4.415959 |
| 57 | 1  | 0 | 2.095697  | 4.141727  | -3.209890 |
| 58 | 1  | 0 | 2.909760  | 5.640374  | -2.720488 |
| 59 | 6  | 0 | 3.002247  | 3.988637  | -1.248704 |
| 60 | 6  | 0 | 3.996502  | 4.834428  | -0.397191 |
| 61 | 6  | 0 | 1.716548  | 4.243313  | -0.482311 |
| 62 | 6  | 0 | 3.180770  | 6.062848  | 0.034112  |
| 63 | 1  | 0 | 4.910278  | 5.079937  | -0.946090 |
| 64 | 1  | 0 | 4.277133  | 4.250300  | 0.486480  |
| 65 | 6  | 0 | 1.796676  | 5.475658  | 0.175518  |
| 66 | 1  | 0 | 3.540909  | 6.510674  | 0.965076  |
| 67 | 1  | 0 | 3.204847  | 6.847190  | -0.733356 |
| 68 | 6  | 0 | 5.304262  | 1.630145  | -2.896521 |
| 69 | 6  | 0 | 5.250676  | 0.484322  | -2.108439 |
| 70 | 6  | 0 | 4.301289  | 0.326159  | -1.090340 |
| 71 | 6  | 0 | 3.462815  | 1.414308  | -0.803986 |
| 72 | 1  | 0 | 6.001589  | 1.693537  | -3.727180 |
| 73 | 1  | 0 | 5.923746  | -0.343840 | -2.313056 |
| 74 | 6  | 0 | 0.567717  | 3.469588  | -0.356963 |
| 75 | 6  | 0 | -0.515497 | 3.921203  | 0.413017  |
| 76 | 6  | 0 | -0.436117 | 5.201780  | 0.973800  |
| 77 | 6  | 0 | 0.711161  | 5.981000  | 0.874587  |
| 78 | 1  | 0 | -1.289953 | 5.562667  | 1.540280  |
| 79 | 1  | 0 | 0.764605  | 6.949348  | 1.364032  |
| 80 | 8  | 0 | 2.522550  | 1.301047  | 0.199047  |
| 81 | 8  | 0 | 0.939648  | -0.202790 | -1.213730 |
| 82 | 8  | 0 | 0.250073  | 0.768374  | 1.093224  |
| 83 | 15 | 0 | 0.979623  | 0.910814  | -0.201564 |
| 84 | 8  | 0 | 0.503740  | 2.254644  | -1.011278 |
| 85 | 6  | 0 | -1.716138 | 3.090698  | 0.735085  |
| 86 | 6  | 0 | -1.965716 | 2.762727  | 2.087288  |
| 87 | 6  | 0 | -2.644048 | 2.722118  | -0.257695 |
| 88 | 6  | 0 | -3.177246 | 2.155405  | 2.415800  |
| 89 | 6  | 0 | -3.833313 | 2.088926  | 0.122521  |
| 90 | 6  | 0 | -4.139906 | 1.840149  | 1.459857  |
| 91 | 1  | 0 | -3.391396 | 1.933079  | 3.460344  |
| 92 | 1  | 0 | -4.550815 | 1.810042  | -0.648141 |
| 93 | 6  | 0 | 4.191469  | -0.992424 | -0.393512 |
| 94 | 6  | 0 | 3.996843  | -2.159966 | -1.163877 |

|     |   |   |           |           |           |
|-----|---|---|-----------|-----------|-----------|
| 95  | 6 | 0 | 4.364886  | -1.107474 | 1.004710  |
| 96  | 6 | 0 | 4.028065  | -3.404258 | -0.530864 |
| 97  | 6 | 0 | 4.378161  | -2.376510 | 1.587397  |
| 98  | 6 | 0 | 4.241937  | -3.542023 | 0.834968  |
| 99  | 1 | 0 | 3.901305  | -4.303384 | -1.131630 |
| 100 | 1 | 0 | 4.537323  | -2.454711 | 2.662369  |
| 101 | 6 | 0 | 3.742103  | -2.151413 | -2.666478 |
| 102 | 1 | 0 | 3.719940  | -1.117238 | -3.013587 |
| 103 | 6 | 0 | 2.362656  | -2.735194 | -2.974668 |
| 104 | 1 | 0 | 2.159450  | -2.704640 | -4.051238 |
| 105 | 1 | 0 | 2.268721  | -3.776011 | -2.642669 |
| 106 | 1 | 0 | 1.612677  | -2.132904 | -2.463194 |
| 107 | 6 | 0 | 4.842839  | -2.890811 | -3.435735 |
| 108 | 1 | 0 | 4.664196  | -2.822895 | -4.514058 |
| 109 | 1 | 0 | 5.833896  | -2.475700 | -3.225778 |
| 110 | 1 | 0 | 4.867197  | -3.953130 | -3.168870 |
| 111 | 6 | 0 | 4.615652  | 0.089064  | 1.912764  |
| 112 | 1 | 0 | 4.611039  | 0.996399  | 1.306062  |
| 113 | 6 | 0 | 5.996809  | -0.004174 | 2.574771  |
| 114 | 1 | 0 | 6.190126  | 0.888530  | 3.179066  |
| 115 | 1 | 0 | 6.066474  | -0.875567 | 3.235230  |
| 116 | 1 | 0 | 6.787242  | -0.089124 | 1.822800  |
| 117 | 6 | 0 | 3.511811  | 0.232468  | 2.967655  |
| 118 | 1 | 0 | 3.676941  | 1.131097  | 3.572051  |
| 119 | 1 | 0 | 2.526608  | 0.317343  | 2.497706  |
| 120 | 1 | 0 | 3.514436  | -0.626531 | 3.650861  |
| 121 | 6 | 0 | 4.368340  | -4.919245 | 1.459429  |
| 122 | 1 | 0 | 4.320473  | -5.649172 | 0.640969  |
| 123 | 6 | 0 | 3.217046  | -5.222970 | 2.420727  |
| 124 | 1 | 0 | 3.303298  | -6.238456 | 2.822576  |
| 125 | 1 | 0 | 3.226814  | -4.523534 | 3.264701  |
| 126 | 1 | 0 | 2.251958  | -5.127512 | 1.912119  |
| 127 | 6 | 0 | 5.719476  | -5.091522 | 2.162371  |
| 128 | 1 | 0 | 5.809811  | -4.401427 | 3.008391  |
| 129 | 1 | 0 | 5.827673  | -6.110471 | 2.548852  |
| 130 | 1 | 0 | 6.547295  | -4.890384 | 1.476613  |
| 131 | 6 | 0 | -0.992246 | 3.074631  | 3.219770  |
| 132 | 1 | 0 | -0.083495 | 3.500824  | 2.788758  |
| 133 | 6 | 0 | -0.565586 | 1.812644  | 3.980792  |
| 134 | 1 | 0 | 0.063998  | 2.085051  | 4.835530  |
| 135 | 1 | 0 | -1.429354 | 1.257266  | 4.367431  |
| 136 | 1 | 0 | 0.012785  | 1.167714  | 3.314462  |
| 137 | 6 | 0 | -1.590880 | 4.101881  | 4.190501  |
| 138 | 1 | 0 | -0.859819 | 4.372623  | 4.959610  |
| 139 | 1 | 0 | -1.899439 | 5.016091  | 3.674495  |
| 140 | 1 | 0 | -2.473207 | 3.693934  | 4.696309  |
| 141 | 6 | 0 | -2.427376 | 3.062303  | -1.725410 |
| 142 | 1 | 0 | -1.486286 | 3.610912  | -1.813901 |
| 143 | 6 | 0 | -2.308711 | 1.803495  | -2.589571 |
| 144 | 1 | 0 | -2.099253 | 2.078044  | -3.629376 |
| 145 | 1 | 0 | -1.503674 | 1.152783  | -2.233926 |
| 146 | 1 | 0 | -3.244174 | 1.233626  | -2.567282 |
| 147 | 6 | 0 | -3.542280 | 3.976827  | -2.248253 |
| 148 | 1 | 0 | -4.514185 | 3.470224  | -2.224899 |
| 149 | 1 | 0 | -3.623392 | 4.884827  | -1.642974 |
| 150 | 1 | 0 | -3.342273 | 4.269154  | -3.284618 |
| 151 | 6 | 0 | -5.469056 | 1.244262  | 1.885733  |

|     |   |   |           |           |          |
|-----|---|---|-----------|-----------|----------|
| 152 | 1 | 0 | -5.543492 | 1.372394  | 2.973628 |
| 153 | 6 | 0 | -6.654827 | 1.971054  | 1.244338 |
| 154 | 1 | 0 | -6.660252 | 1.824154  | 0.159008 |
| 155 | 1 | 0 | -7.599626 | 1.575164  | 1.631995 |
| 156 | 1 | 0 | -6.618175 | 3.046034  | 1.444697 |
| 157 | 6 | 0 | -5.525877 | -0.252902 | 1.575828 |
| 158 | 1 | 0 | -6.486452 | -0.682873 | 1.880987 |
| 159 | 1 | 0 | -5.420253 | -0.414095 | 0.498270 |
| 160 | 1 | 0 | -4.724914 | -0.797280 | 2.087319 |

-----

**I-I\_R\_endo**

M06-2X/6-31g(d) in gas phase

SCF Done: E(RM062X) = -3617.191584 hartree

Sum of electronic and thermal Free Energies = -3615.919252 hartree

The number of imaginary frequency = 1

Imaginary frequency = -396.154

-----

| Center Number | Atomic Number | Atomic Type | Coordinates (Angstroms) |           |           |
|---------------|---------------|-------------|-------------------------|-----------|-----------|
|               |               |             | X                       | Y         | Z         |
| 1             | 6             | 0           | -3.632779               | -1.627206 | -4.047740 |
| 2             | 1             | 0           | -3.478932               | -0.665308 | -3.568426 |
| 3             | 1             | 0           | -4.154091               | -1.587681 | -4.999891 |
| 4             | 6             | 0           | -3.723135               | -2.778725 | -3.286622 |
| 5             | 1             | 0           | -4.133714               | -3.665528 | -3.767608 |
| 6             | 6             | 0           | -3.163403               | -2.971470 | -2.007022 |
| 7             | 1             | 0           | -3.159926               | -3.968523 | -1.586869 |
| 8             | 6             | 0           | -2.525238               | -1.962908 | -1.319624 |
| 9             | 1             | 0           | -2.582610               | -0.930079 | -1.653983 |
| 10            | 1             | 0           | -1.314337               | -1.250663 | 0.196201  |
| 11            | 7             | 0           | -1.789485               | -2.095027 | -0.184897 |
| 12            | 6             | 0           | -1.607356               | -3.262722 | 0.531277  |
| 13            | 8             | 0           | -0.646765               | -3.056429 | 1.442024  |
| 14            | 8             | 0           | -2.208302               | -4.303822 | 0.388151  |
| 15            | 6             | 0           | -0.547136               | -4.037845 | 2.469402  |
| 16            | 1             | 0           | -1.543257               | -4.192735 | 2.902497  |
| 17            | 1             | 0           | -0.219492               | -4.987823 | 2.034229  |
| 18            | 6             | 0           | 0.427732                | -3.544768 | 3.507147  |
| 19            | 6             | 0           | 0.768096                | -2.194979 | 3.615409  |
| 20            | 6             | 0           | 0.985644                | -4.468024 | 4.392914  |
| 21            | 6             | 0           | 1.649621                | -1.782239 | 4.613201  |
| 22            | 1             | 0           | 0.369776                | -1.475494 | 2.903693  |
| 23            | 6             | 0           | 1.868608                | -4.052952 | 5.384978  |
| 24            | 1             | 0           | 0.729540                | -5.521698 | 4.301914  |
| 25            | 6             | 0           | 2.201656                | -2.705018 | 5.498088  |
| 26            | 1             | 0           | 1.907070                | -0.730608 | 4.692770  |
| 27            | 1             | 0           | 2.298343                | -4.781402 | 6.065934  |
| 28            | 1             | 0           | 2.890257                | -2.376566 | 6.270532  |
| 29            | 1             | 0           | 0.720873                | -0.885692 | -1.701329 |
| 30            | 6             | 0           | 2.491260                | -4.318652 | 1.026246  |
| 31            | 6             | 0           | 1.794411                | -4.909403 | -0.006099 |
| 32            | 6             | 0           | 1.198858                | -4.113168 | -1.005533 |
| 33            | 6             | 0           | 1.341313                | -2.713384 | -0.928241 |
| 34            | 6             | 0           | 2.084615                | -2.111802 | 0.100695  |
| 35            | 6             | 0           | 2.638689                | -2.917537 | 1.070603  |

|    |    |   |           |           |           |     |   |   |           |           |           |
|----|----|---|-----------|-----------|-----------|-----|---|---|-----------|-----------|-----------|
| 36 | 1  | 0 | 0.299265  | -5.712800 | -2.167320 | 93  | 6 | 0 | -3.595315 | 1.371969  | 0.600229  |
| 37 | 1  | 0 | 2.929963  | -4.926900 | 1.810850  | 94  | 6 | 0 | -3.958940 | 0.252120  | 1.378558  |
| 38 | 1  | 0 | 1.681221  | -5.989093 | -0.058670 | 95  | 6 | 0 | -4.055999 | 1.470742  | -0.732860 |
| 39 | 6  | 0 | 0.413888  | -4.635317 | -2.083832 | 96  | 6 | 0 | -4.792215 | -0.723061 | 0.822537  |
| 40 | 1  | 0 | 2.197722  | -1.030433 | 0.119806  | 97  | 6 | 0 | -4.890802 | 0.472052  | -1.236301 |
| 41 | 1  | 0 | 3.190096  | -2.463608 | 1.888258  | 98  | 6 | 0 | -5.284763 | -0.629464 | -0.474485 |
| 42 | 6  | 0 | -0.103129 | -2.389052 | -2.830501 | 99  | 1 | 0 | -5.062041 | -1.580569 | 1.433065  |
| 43 | 6  | 0 | -0.200683 | -3.813697 | -2.974172 | 100 | 1 | 0 | -5.267172 | 0.559913  | -2.255972 |
| 44 | 1  | 0 | -0.819109 | -4.215009 | -3.767808 | 101 | 6 | 0 | -3.507310 | 0.047425  | 2.820788  |
| 45 | 7  | 0 | 0.691724  | -1.927603 | -1.848641 | 102 | 1 | 0 | -2.832951 | 0.861343  | 3.094563  |
| 46 | 6  | 0 | -0.793842 | -1.426620 | -3.620030 | 103 | 6 | 0 | -4.703818 | 0.068801  | 3.780931  |
| 47 | 1  | 0 | -0.641172 | -0.388096 | -3.333854 | 104 | 1 | 0 | -5.375559 | -0.775283 | 3.588490  |
| 48 | 6  | 0 | -1.626930 | -1.711489 | -4.688034 | 105 | 1 | 0 | -4.360996 | -0.007238 | 4.818087  |
| 49 | 1  | 0 | -1.649088 | -2.704241 | -5.126293 | 106 | 1 | 0 | -5.292017 | 0.986443  | 3.679849  |
| 50 | 1  | 0 | -1.837071 | -0.910856 | -5.390505 | 107 | 6 | 0 | -2.707480 | -1.248169 | 2.982460  |
| 51 | 6  | 0 | -0.466758 | 5.539274  | 3.129896  | 108 | 1 | 0 | -2.427878 | -1.395168 | 4.032233  |
| 52 | 6  | 0 | -1.434191 | 4.529291  | 2.554520  | 109 | 1 | 0 | -3.283539 | -2.126413 | 2.661857  |
| 53 | 6  | 0 | -0.922924 | 3.983659  | 1.373783  | 110 | 1 | 0 | -1.792992 | -1.187244 | 2.392416  |
| 54 | 6  | 0 | 0.814986  | 5.260711  | 2.322004  | 111 | 6 | 0 | -3.726946 | 2.649832  | -1.637873 |
| 55 | 1  | 0 | -0.823136 | 6.565242  | 2.973148  | 112 | 1 | 0 | -3.104488 | 3.354254  | -1.082862 |
| 56 | 1  | 0 | -0.325690 | 5.410269  | 4.207259  | 113 | 6 | 0 | -4.998045 | 3.400401  | -2.054730 |
| 57 | 1  | 0 | 1.378938  | 4.445243  | 2.788654  | 114 | 1 | 0 | -5.661059 | 2.764080  | -2.651120 |
| 58 | 1  | 0 | 1.476908  | 6.127772  | 2.235776  | 115 | 1 | 0 | -5.557624 | 3.740427  | -1.178112 |
| 59 | 6  | 0 | 0.296886  | 4.771528  | 0.940430  | 116 | 1 | 0 | -4.741768 | 4.275744  | -2.660920 |
| 60 | 6  | 0 | -0.116373 | 6.000343  | 0.080223  | 117 | 6 | 0 | -2.927551 | 2.199544  | -2.866495 |
| 61 | 6  | 0 | 1.416186  | 4.208022  | 0.085747  | 118 | 1 | 0 | -2.617158 | 3.066199  | -3.459893 |
| 62 | 6  | 0 | 1.208281  | 6.516669  | -0.506779 | 119 | 1 | 0 | -2.025379 | 1.655407  | -2.566840 |
| 63 | 1  | 0 | -0.663677 | 6.749356  | 0.660388  | 120 | 1 | 0 | -3.540272 | 1.560902  | -3.515534 |
| 64 | 1  | 0 | -0.768777 | 5.651568  | -0.728340 | 121 | 6 | 0 | -6.259203 | -1.637305 | -1.056626 |
| 65 | 6  | 0 | 2.009912  | 5.242861  | -0.645235 | 122 | 1 | 0 | -5.957250 | -1.810131 | -2.098431 |
| 66 | 1  | 0 | 1.078562  | 7.032181  | -1.463093 | 123 | 6 | 0 | -7.675463 | -1.043419 | -1.069987 |
| 67 | 1  | 0 | 1.699499  | 7.221981  | 0.175683  | 124 | 1 | 0 | -8.385519 | -1.741368 | -1.526569 |
| 68 | 6  | 0 | -2.667462 | 4.121633  | 3.041881  | 125 | 1 | 0 | -8.007194 | -0.837723 | -0.046308 |
| 69 | 6  | 0 | -3.364204 | 3.133454  | 2.352853  | 126 | 1 | 0 | -7.708377 | -0.102761 | -1.628043 |
| 70 | 6  | 0 | -2.828333 | 2.489355  | 1.230046  | 127 | 6 | 0 | -6.256924 | -2.983878 | -0.333119 |
| 71 | 6  | 0 | -1.584559 | 2.930570  | 0.755657  | 128 | 1 | 0 | -6.696800 | -2.893195 | 0.666709  |
| 72 | 1  | 0 | -3.084268 | 4.560052  | 3.944190  | 129 | 1 | 0 | -6.858701 | -3.710066 | -0.888602 |
| 73 | 1  | 0 | -4.339777 | 2.813296  | 2.707755  | 130 | 1 | 0 | -5.243904 | -3.384154 | -0.223845 |
| 74 | 6  | 0 | 1.922042  | 2.917192  | -0.013026 | 131 | 6 | 0 | 3.174212  | 1.296895  | -3.406076 |
| 75 | 6  | 0 | 3.083980  | 2.661181  | -0.756181 | 132 | 1 | 0 | 2.503578  | 2.104879  | -3.101616 |
| 76 | 6  | 0 | 3.707809  | 3.739013  | -1.394277 | 133 | 6 | 0 | 2.331920  | 0.281859  | -4.183295 |
| 77 | 6  | 0 | 3.167711  | 5.021343  | -1.374542 | 134 | 1 | 0 | 1.839844  | 0.773398  | -5.029549 |
| 78 | 1  | 0 | 4.629836  | 3.548318  | -1.934262 | 135 | 1 | 0 | 2.941521  | -0.535147 | -4.585019 |
| 79 | 1  | 0 | 3.644972  | 5.828578  | -1.922943 | 136 | 1 | 0 | 1.561237  | -0.140368 | -3.541052 |
| 80 | 8  | 0 | -1.017857 | 2.340224  | -0.357580 | 137 | 6 | 0 | 4.259053  | 1.867279  | -4.331108 |
| 81 | 8  | 0 | -0.461844 | 0.097235  | 0.829167  | 138 | 1 | 0 | 3.803886  | 2.325938  | -5.215517 |
| 82 | 8  | 0 | 0.485615  | 0.730727  | -1.517501 | 139 | 1 | 0 | 4.873539  | 2.622588  | -3.834661 |
| 83 | 15 | 0 | 0.057955  | 1.124514  | -0.129453 | 140 | 1 | 0 | 4.927967  | 1.068890  | -4.672732 |
| 84 | 8  | 0 | 1.285195  | 1.884518  | 0.652501  | 141 | 6 | 0 | 4.242336  | 1.301641  | 1.628309  |
| 85 | 6  | 0 | 3.698296  | 1.303693  | -0.881502 | 142 | 1 | 0 | 3.675320  | 2.233808  | 1.572623  |
| 86 | 6  | 0 | 3.789248  | 0.692607  | -2.149785 | 143 | 6 | 0 | 3.509955  | 0.382875  | 2.611382  |
| 87 | 6  | 0 | 4.302992  | 0.690551  | 0.236155  | 144 | 1 | 0 | 3.409686  | 0.876738  | 3.584704  |
| 88 | 6  | 0 | 4.520096  | -0.490981 | -2.273841 | 145 | 1 | 0 | 2.505624  | 0.138124  | 2.247605  |
| 89 | 6  | 0 | 5.021971  | -0.493710 | 0.057768  | 146 | 1 | 0 | 4.065792  | -0.549190 | 2.773213  |
| 90 | 6  | 0 | 5.165996  | -1.088019 | -1.195535 | 147 | 6 | 0 | 5.644327  | 1.652422  | 2.140996  |
| 91 | 1  | 0 | 4.617386  | -0.950525 | -3.255746 | 148 | 1 | 0 | 6.264193  | 0.755845  | 2.251189  |
| 92 | 1  | 0 | 5.501173  | -0.951689 | 0.922483  | 149 | 1 | 0 | 6.154354  | 2.331147  | 1.450581  |



|     |   |   |          |           |           |    |   |   |           |           |           |
|-----|---|---|----------|-----------|-----------|----|---|---|-----------|-----------|-----------|
| 150 | 1 | 0 | 5.582839 | 2.138773  | 3.120313  | 34 | 6 | 0 | -0.795776 | -2.528884 | -2.702080 |
| 151 | 6 | 0 | 6.017633 | -2.327172 | -1.402876 | 35 | 6 | 0 | -1.410310 | -3.188278 | -3.745281 |
| 152 | 1 | 0 | 6.072857 | -2.499248 | -2.485726 | 36 | 1 | 0 | -1.290196 | -6.132789 | 0.136482  |
| 153 | 6 | 0 | 5.386768 | -3.567517 | -0.765286 | 37 | 1 | 0 | -2.371260 | -5.004264 | -4.426065 |
| 154 | 1 | 0 | 5.990913 | -4.457639 | -0.972717 | 38 | 1 | 0 | -2.116706 | -6.167173 | -2.250479 |
| 155 | 1 | 0 | 5.319308 | -3.450876 | 0.322358  | 39 | 6 | 0 | -0.914195 | -5.125809 | -0.022626 |
| 156 | 1 | 0 | 4.373236 | -3.736140 | -1.142814 | 40 | 1 | 0 | -0.442885 | -1.504842 | -2.791392 |
| 157 | 6 | 0 | 7.446832 | -2.120596 | -0.889746 | 41 | 1 | 0 | -1.537498 | -2.678304 | -4.695278 |
| 158 | 1 | 0 | 8.066584 | -2.994582 | -1.115919 | 42 | 6 | 0 | 0.215388  | -3.131463 | 0.778009  |
| 159 | 1 | 0 | 7.907738 | -1.240420 | -1.347179 | 43 | 6 | 0 | -0.289064 | -4.461158 | 0.981719  |
| 160 | 1 | 0 | 7.456347 | -1.978897 | 0.196489  | 44 | 1 | 0 | -0.164297 | -4.917381 | 1.956192  |

-----

**I-I\_S\_endo2**

M06-2X/6-31g(d) in gas phase

SCF Done: E(RM062X) = -3617.190555 hartree

Sum of electronic and thermal Free Energies = -3615.915464 hartree

The number of imaginary frequency = 1

Imaginary frequency = -346.07

| Center Number | Atomic Number | Atomic Type | Coordinates (Angstroms) |           |           |
|---------------|---------------|-------------|-------------------------|-----------|-----------|
|               |               |             | X                       | Y         | Z         |
| 1             | 6             | 0           | -0.248072               | -2.058655 | 4.423409  |
| 2             | 1             | 0           | 0.006632                | -1.044400 | 4.131476  |
| 3             | 1             | 0           | 0.184021                | -2.387023 | 5.364048  |
| 4             | 6             | 0           | -1.405584               | -2.659472 | 3.973364  |
| 5             | 1             | 0           | -1.737612               | -3.560301 | 4.487016  |
| 6             | 6             | 0           | -2.090332               | -2.326595 | 2.780388  |
| 7             | 1             | 0           | -2.875949               | -2.978304 | 2.422998  |
| 8             | 6             | 0           | -1.678154               | -1.259301 | 2.020956  |
| 9             | 1             | 0           | -0.954752               | -0.546308 | 2.393657  |
| 10            | 1             | 0           | -1.737292               | -0.009550 | 0.430392  |
| 11            | 7             | 0           | -2.101609               | -0.899249 | 0.775484  |
| 12            | 6             | 0           | -2.884152               | -1.666223 | -0.053804 |
| 13            | 8             | 0           | -3.076513               | -1.037583 | -1.220149 |
| 14            | 8             | 0           | -3.317914               | -2.766678 | 0.221594  |
| 15            | 6             | 0           | -3.954901               | -1.704691 | -2.145774 |
| 16            | 1             | 0           | -3.644809               | -1.330735 | -3.123692 |
| 17            | 1             | 0           | -3.770730               | -2.780456 | -2.093715 |
| 18            | 6             | 0           | -5.396449               | -1.366056 | -1.864907 |
| 19            | 6             | 0           | -5.990977               | -0.267053 | -2.489806 |
| 20            | 6             | 0           | -6.144447               | -2.122620 | -0.958872 |
| 21            | 6             | 0           | -7.306196               | 0.086919  | -2.201554 |
| 22            | 1             | 0           | -5.414656               | 0.318378  | -3.203795 |
| 23            | 6             | 0           | -7.461994               | -1.772512 | -0.673165 |
| 24            | 1             | 0           | -5.679530               | -2.972790 | -0.469113 |
| 25            | 6             | 0           | -8.042852               | -0.665811 | -1.289071 |
| 26            | 1             | 0           | -7.755096               | 0.947127  | -2.688336 |
| 27            | 1             | 0           | -8.035081               | -2.363669 | 0.034811  |
| 28            | 1             | 0           | -9.068492               | -0.391848 | -1.061428 |
| 29            | 1             | 0           | 0.412277                | -1.619421 | -0.627924 |
| 30            | 6             | 0           | -1.886348               | -4.506334 | -3.593075 |
| 31            | 6             | 0           | -1.743012               | -5.156101 | -2.385935 |
| 32            | 6             | 0           | -1.103302               | -4.518366 | -1.304405 |
| 33            | 6             | 0           | -0.619148               | -3.206640 | -1.479546 |

|    |    |   |           |           |           |
|----|----|---|-----------|-----------|-----------|
| 45 | 7  | 0 | 0.025592  | -2.582879 | -0.437733 |
| 46 | 6  | 0 | 0.920096  | -2.376637 | 1.757391  |
| 47 | 1  | 0 | 1.264161  | -1.390624 | 1.457176  |
| 48 | 6  | 0 | 1.200229  | -2.822764 | 3.034350  |
| 49 | 1  | 0 | 1.067168  | -3.862760 | 3.309722  |
| 50 | 1  | 0 | 1.978478  | -2.306023 | 3.587751  |
| 51 | 6  | 0 | 4.168595  | 4.336505  | -3.058371 |
| 52 | 6  | 0 | 4.388079  | 2.994949  | -2.394712 |
| 53 | 6  | 0 | 3.506866  | 2.830824  | -1.321273 |
| 54 | 6  | 0 | 2.834624  | 4.794801  | -2.437878 |
| 55 | 1  | 0 | 4.980471  | 5.036668  | -2.824798 |
| 56 | 1  | 0 | 4.122441  | 4.252697  | -4.148442 |
| 57 | 1  | 0 | 1.995694  | 4.372593  | -3.001834 |
| 58 | 1  | 0 | 2.715291  | 5.882206  | -2.409829 |
| 59 | 6  | 0 | 2.842100  | 4.162828  | -1.018967 |
| 60 | 6  | 0 | 3.747148  | 5.019706  | -0.084610 |
| 61 | 6  | 0 | 1.511017  | 4.310884  | -0.304498 |
| 62 | 6  | 0 | 2.843710  | 6.181096  | 0.361272  |
| 63 | 1  | 0 | 4.669222  | 5.341075  | -0.577892 |
| 64 | 1  | 0 | 4.020252  | 4.410609  | 0.784446  |
| 65 | 6  | 0 | 1.486664  | 5.518515  | 0.400885  |
| 66 | 1  | 0 | 3.131873  | 6.598493  | 1.330681  |
| 67 | 1  | 0 | 2.864890  | 7.004255  | -0.364419 |
| 68 | 6  | 0 | 5.291493  | 1.995602  | -2.726389 |
| 69 | 6  | 0 | 5.267999  | 0.806363  | -2.003997 |
| 70 | 6  | 0 | 4.311368  | 0.559997  | -1.011018 |
| 71 | 6  | 0 | 3.425189  | 1.597451  | -0.683953 |
| 72 | 1  | 0 | 6.000467  | 2.131537  | -3.538274 |
| 73 | 1  | 0 | 5.975292  | 0.016104  | -2.240289 |
| 74 | 6  | 0 | 0.403032  | 3.472151  | -0.271423 |
| 75 | 6  | 0 | -0.752955 | 3.840134  | 0.435194  |
| 76 | 6  | 0 | -0.776071 | 5.101229  | 1.043149  |
| 77 | 6  | 0 | 0.334757  | 5.938596  | 1.048914  |
| 78 | 1  | 0 | -1.682015 | 5.399322  | 1.563957  |
| 79 | 1  | 0 | 0.306092  | 6.888115  | 1.575931  |
| 80 | 8  | 0 | 2.479285  | 1.396412  | 0.299383  |
| 81 | 8  | 0 | 0.991286  | -0.161423 | -1.158536 |
| 82 | 8  | 0 | 0.214655  | 0.768985  | 1.140459  |
| 83 | 15 | 0 | 0.963315  | 0.945953  | -0.138581 |
| 84 | 8  | 0 | 0.452378  | 2.272477  | -0.954521 |
| 85 | 6  | 0 | -1.928548 | 2.935729  | 0.619550  |
| 86 | 6  | 0 | -2.302258 | 2.548309  | 1.930337  |
| 87 | 6  | 0 | -2.711856 | 2.528953  | -0.475862 |
| 88 | 6  | 0 | -3.469571 | 1.806861  | 2.108607  |
| 89 | 6  | 0 | -3.871078 | 1.782736  | -0.240500 |
| 90 | 6  | 0 | -4.278191 | 1.421915  | 1.038711  |

|     |   |   |           |           |           |     |   |   |           |           |          |
|-----|---|---|-----------|-----------|-----------|-----|---|---|-----------|-----------|----------|
| 91  | 1 | 0 | -3.758591 | 1.523943  | 3.119537  | 117 | 6 | 0 | 3.530415  | 0.257741  | 3.034641 |
| 92  | 1 | 0 | -4.485238 | 1.476584  | -1.084570 | 118 | 1 | 0 | 3.660639  | 1.138211  | 3.673132 |
| 93  | 6 | 0 | 4.248312  | -0.792751 | -0.376834 | 119 | 1 | 0 | 2.539924  | 0.319711  | 2.571600 |
| 94  | 6 | 0 | 4.094270  | -1.930124 | -1.198937 | 120 | 1 | 0 | 3.573003  | -0.626019 | 3.684112 |
| 95  | 6 | 0 | 4.429541  | -0.963183 | 1.014435  | 121 | 6 | 0 | 4.586576  | -4.787779 | 1.296390 |
| 96  | 6 | 0 | 4.175139  | -3.199671 | -0.622755 | 122 | 1 | 0 | 4.551293  | -5.482938 | 0.447582 |
| 97  | 6 | 0 | 4.494033  | -2.255437 | 1.539517  | 123 | 6 | 0 | 3.465746  | -5.177000 | 2.262852 |
| 98  | 6 | 0 | 4.399939  | -3.390240 | 0.735190  | 124 | 1 | 0 | 3.600883  | -6.203245 | 2.621555 |
| 99  | 1 | 0 | 4.081413  | -4.075180 | -1.263156 | 125 | 1 | 0 | 3.461716  | -4.512437 | 3.134618 |
| 100 | 1 | 0 | 4.660488  | -2.375815 | 2.609605  | 126 | 1 | 0 | 2.488664  | -5.102393 | 1.774145 |
| 101 | 6 | 0 | 3.842949  | -1.860183 | -2.700460 | 127 | 6 | 0 | 5.955983  | -4.938169 | 1.968623 |
| 102 | 1 | 0 | 3.769701  | -0.811777 | -2.994976 | 128 | 1 | 0 | 6.035904  | -4.280468 | 2.841113 |
| 103 | 6 | 0 | 2.498392  | -2.500139 | -3.050684 | 129 | 1 | 0 | 6.109014  | -5.967415 | 2.310078 |
| 104 | 1 | 0 | 2.305583  | -2.430594 | -4.127307 | 130 | 1 | 0 | 6.762969  | -4.677530 | 1.278091 |
| 105 | 1 | 0 | 2.457218  | -3.558895 | -2.768769 | 131 | 6 | 0 | -1.503822 | 2.924089  | 3.175515 |
| 106 | 1 | 0 | 1.711829  | -1.962734 | -2.522205 | 132 | 1 | 0 | -0.610535 | 3.469827  | 2.865363 |
| 107 | 6 | 0 | 4.984201  | -2.504081 | -3.496709 | 133 | 6 | 0 | -1.012049 | 1.694043  | 3.949507 |
| 108 | 1 | 0 | 4.807779  | -2.393368 | -4.571857 | 134 | 1 | 0 | -0.539241 | 2.006271  | 4.887589 |
| 109 | 1 | 0 | 5.951875  | -2.050364 | -3.259807 | 135 | 1 | 0 | -1.833190 | 1.010983  | 4.200820 |
| 110 | 1 | 0 | 5.060785  | -3.575451 | -3.280357 | 136 | 1 | 0 | -0.271588 | 1.162548  | 3.346574 |
| 111 | 6 | 0 | 4.634966  | 0.202512  | 1.972395  | 137 | 6 | 0 | -2.326944 | 3.840081  | 4.091732 |
| 112 | 1 | 0 | 4.591346  | 1.133714  | 1.404643  | 138 | 1 | 0 | -1.723510 | 4.173096  | 4.942764 |
| 113 | 6 | 0 | 6.021002  | 0.137270  | 2.627307  | 139 | 1 | 0 | -2.688124 | 4.725554  | 3.559163 |
| 114 | 1 | 0 | 6.180085  | 1.009811  | 3.269823  | 140 | 1 | 0 | -3.202777 | 3.314197  | 4.488149 |
| 115 | 1 | 0 | 6.128386  | -0.758727 | 3.248668  |     |   |   |           |           |          |
| 116 | 1 | 0 | 6.811448  | 0.117626  | 1.870852  |     |   |   |           |           |          |
| 141 | 6 | 0 | -2.384192 | 2.908375  | -1.912304 |     |   |   |           |           |          |
| 142 | 1 | 0 | -1.471964 | 3.509512  | -1.915026 |     |   |   |           |           |          |
| 143 | 6 | 0 | -2.123469 | 1.664645  | -2.769576 |     |   |   |           |           |          |
| 144 | 1 | 0 | -1.833554 | 1.958050  | -3.784576 |     |   |   |           |           |          |
| 145 | 1 | 0 | -1.321981 | 1.053564  | -2.343045 |     |   |   |           |           |          |
| 146 | 1 | 0 | -3.027803 | 1.047698  | -2.838776 |     |   |   |           |           |          |
| 147 | 6 | 0 | -3.500364 | 3.765500  | -2.522671 |     |   |   |           |           |          |
| 148 | 1 | 0 | -4.440907 | 3.205848  | -2.584555 |     |   |   |           |           |          |
| 149 | 1 | 0 | -3.682262 | 4.661528  | -1.921436 |     |   |   |           |           |          |
| 150 | 1 | 0 | -3.230083 | 4.079161  | -3.536684 |     |   |   |           |           |          |
| 151 | 6 | 0 | -5.585270 | 0.681934  | 1.247904  |     |   |   |           |           |          |
| 152 | 1 | 0 | -5.931483 | 0.351981  | 0.261585  |     |   |   |           |           |          |
| 153 | 6 | 0 | -5.442922 | -0.558625 | 2.133946  |     |   |   |           |           |          |
| 154 | 1 | 0 | -5.079215 | -0.297990 | 3.134389  |     |   |   |           |           |          |
| 155 | 1 | 0 | -6.415998 | -1.049137 | 2.250076  |     |   |   |           |           |          |
| 156 | 1 | 0 | -4.752079 | -1.289658 | 1.703715  |     |   |   |           |           |          |
| 157 | 6 | 0 | -6.647528 | 1.630071  | 1.818329  |     |   |   |           |           |          |
| 158 | 1 | 0 | -7.613461 | 1.119567  | 1.902405  |     |   |   |           |           |          |
| 159 | 1 | 0 | -6.358139 | 1.980466  | 2.815944  |     |   |   |           |           |          |
| 160 | 1 | 0 | -6.773897 | 2.507513  | 1.177025  |     |   |   |           |           |          |

**TSr(Br)**

M06-2X/6-31g(d) in gas phase

SCF Done: E(RM062X) = -6188.378498 hartree

Sum of electronic and thermal Free Energies = -6187.117688 hartree

The number of imaginary frequency = 1

Imaginary frequency = -353.25

| Center Number | Atomic Number | Atomic Type | Coordinates (Angstroms) |   |   | 1 | 6 | 0 | -4.697231 | -2.954938 | -2.596543 |
|---------------|---------------|-------------|-------------------------|---|---|---|---|---|-----------|-----------|-----------|
|               |               |             | X                       | Y | Z | 2 | 1 | 0 | -4.645887 | -1.899921 | -2.344266 |

|    |   |   |           |           |           |     |    |   |           |           |           |
|----|---|---|-----------|-----------|-----------|-----|----|---|-----------|-----------|-----------|
| 3  | 1 | 0 | -5.412831 | -3.210251 | -3.372733 | 60  | 6  | 0 | 0.512715  | 4.145933  | -1.213326 |
| 4  | 6 | 0 | -4.333866 | -3.912651 | -1.672248 | 61  | 6  | 0 | -0.087893 | 6.239543  | -2.208226 |
| 5  | 1 | 0 | -4.634935 | -4.941098 | -1.865282 | 62  | 1  | 0 | -1.667921 | 6.617912  | -0.698548 |
| 6  | 6 | 0 | -3.438970 | -3.714367 | -0.597807 | 63  | 1  | 0 | -1.951826 | 5.227299  | -1.761463 |
| 7  | 1 | 0 | -3.084026 | -4.575987 | -0.048267 | 64  | 6  | 0 | 0.797212  | 5.016994  | -2.270085 |
| 8  | 6 | 0 | -2.916149 | -2.474736 | -0.302985 | 65  | 1  | 0 | -0.483604 | 6.517116  | -3.189785 |
| 9  | 1 | 0 | -3.327457 | -1.572922 | -0.747686 | 66  | 1  | 0 | 0.463373  | 7.107763  | -1.825018 |
| 10 | 1 | 0 | -1.626126 | -1.213209 | 0.718636  | 67  | 6  | 0 | -2.818950 | 4.484525  | 2.556365  |
| 11 | 7 | 0 | -1.920859 | -2.198996 | 0.581149  | 68  | 6  | 0 | -3.528894 | 3.323446  | 2.264409  |
| 12 | 6 | 0 | -1.112902 | -3.136389 | 1.193436  | 69  | 6  | 0 | -3.169540 | 2.474601  | 1.209163  |
| 13 | 8 | 0 | -0.171954 | -2.483288 | 1.881973  | 70  | 6  | 0 | -2.111771 | 2.876787  | 0.381689  |
| 14 | 8 | 0 | -1.207718 | -4.341206 | 1.123500  | 71  | 1  | 0 | -3.085520 | 5.088450  | 3.419082  |
| 15 | 6 | 0 | 0.738737  | -3.270962 | 2.634561  | 72  | 1  | 0 | -4.365960 | 3.031289  | 2.891986  |
| 16 | 1 | 0 | 0.194976  | -3.773463 | 3.443774  | 73  | 6  | 0 | 1.134102  | 2.900266  | -1.157038 |
| 17 | 1 | 0 | 1.173291  | -4.043368 | 1.990087  | 74  | 6  | 0 | 2.116227  | 2.555394  | -2.097693 |
| 18 | 6 | 0 | 1.797234  | -2.342091 | 3.169758  | 75  | 6  | 0 | 2.431854  | 3.487911  | -3.094671 |
| 19 | 6 | 0 | 1.703383  | -0.959947 | 2.998721  | 76  | 6  | 0 | 1.767327  | 4.702911  | -3.209448 |
| 20 | 6 | 0 | 2.906499  | -2.882375 | 3.822012  | 77  | 1  | 0 | 3.215263  | 3.230194  | -3.801000 |
| 21 | 6 | 0 | 2.711135  | -0.129132 | 3.482163  | 78  | 1  | 0 | 2.001465  | 5.386366  | -4.020683 |
| 22 | 1 | 0 | 0.863064  | -0.525751 | 2.461730  | 79  | 8  | 0 | -1.713672 | 2.083695  | -0.678148 |
| 23 | 6 | 0 | 3.925647  | -2.061705 | 4.292734  | 80  | 8  | 0 | -0.716707 | 0.288915  | 0.891375  |
| 24 | 1 | 0 | 2.987453  | -3.959667 | 3.950439  | 81  | 8  | 0 | -0.333954 | 0.267279  | -1.687335 |
| 25 | 6 | 0 | 3.816588  | -0.686871 | 4.111892  | 82  | 15 | 0 | -0.495461 | 1.021833  | -0.395155 |
| 26 | 1 | 0 | 2.645740  | 0.945034  | 3.345453  | 83  | 8  | 0 | 0.787665  | 2.015684  | -0.148206 |
| 27 | 1 | 0 | 4.796413  | -2.478019 | 4.786907  | 84  | 6  | 0 | 2.856706  | 1.254745  | -2.100319 |
| 28 | 1 | 0 | 0.009988  | -1.338578 | -1.581769 | 85  | 6  | 0 | 2.668235  | 0.347841  | -3.161171 |
| 29 | 6 | 0 | 3.284600  | -4.229216 | 0.283502  | 86  | 6  | 0 | 3.840737  | 0.998508  | -1.117123 |
| 30 | 6 | 0 | 2.358774  | -5.001991 | -0.387474 | 87  | 6  | 0 | 3.453461  | -0.809345 | -3.210171 |
| 31 | 6 | 0 | 1.269406  | -4.394298 | -1.044458 | 88  | 6  | 0 | 4.608560  | -0.159217 | -1.224628 |
| 32 | 6 | 0 | 1.152272  | -2.988621 | -1.001198 | 89  | 6  | 0 | 4.426864  | -1.080574 | -2.257351 |
| 33 | 6 | 0 | 2.096935  | -2.200255 | -0.321287 | 90  | 1  | 0 | 3.297940  | -1.509027 | -4.027045 |
| 34 | 6 | 0 | 3.149238  | -2.825968 | 0.312922  | 91  | 1  | 0 | 5.373255  | -0.366208 | -0.479185 |
| 35 | 1 | 0 | 0.337968  | -6.200173 | -1.809332 | 92  | 6  | 0 | -3.915674 | 1.191774  | 1.026557  |
| 36 | 1 | 0 | 4.121968  | -4.698086 | 0.790475  | 93  | 6  | 0 | -3.967108 | 0.260075  | 2.086656  |
| 37 | 1 | 0 | 2.453941  | -6.083706 | -0.420394 | 94  | 6  | 0 | -4.666929 | 0.950356  | -0.146774 |
| 38 | 6 | 0 | 0.267881  | -5.116685 | -1.767969 | 95  | 6  | 0 | -4.790637 | -0.864549 | 1.967091  |
| 39 | 1 | 0 | 1.993319  | -1.116476 | -0.316516 | 96  | 6  | 0 | -5.483156 | -0.180065 | -0.206799 |
| 40 | 1 | 0 | 3.878922  | -2.221684 | 0.845431  | 97  | 6  | 0 | -5.573231 | -1.097709 | 0.841136  |
| 41 | 6 | 0 | -0.865527 | -3.045199 | -2.316035 | 98  | 1  | 0 | -4.818515 | -1.572579 | 2.791008  |
| 42 | 6 | 0 | -0.757097 | -4.473765 | -2.385246 | 99  | 1  | 0 | -6.087507 | -0.349342 | -1.098393 |
| 43 | 1 | 0 | -1.520770 | -5.026210 | -2.918848 | 100 | 6  | 0 | -3.191061 | 0.428437  | 3.389221  |
| 44 | 7 | 0 | 0.087138  | -2.389473 | -1.628629 | 101 | 1  | 0 | -2.564682 | 1.318944  | 3.306901  |
| 45 | 6 | 0 | -1.886027 | -2.263485 | -2.936429 | 102 | 6  | 0 | -4.150574 | 0.618038  | 4.572329  |
| 46 | 1 | 0 | -1.817509 | -1.189646 | -2.778398 | 103 | 1  | 0 | -4.745501 | -0.286728 | 4.741084  |
| 47 | 6 | 0 | -2.885691 | -2.767540 | -3.743396 | 104 | 1  | 0 | -3.588304 | 0.823423  | 5.489146  |
| 48 | 1 | 0 | -2.857557 | -3.792627 | -4.097732 | 105 | 1  | 0 | -4.849313 | 1.443811  | 4.405596  |
| 49 | 1 | 0 | -3.405723 | -2.077315 | -4.400061 | 106 | 6  | 0 | -2.242903 | -0.744958 | 3.655546  |
| 50 | 6 | 0 | -0.814705 | 6.017134  | 1.845392  | 107 | 1  | 0 | -1.761392 | -0.620688 | 4.632202  |
| 51 | 6 | 0 | -1.766090 | 4.846988  | 1.728866  | 108 | 1  | 0 | -2.771500 | -1.706171 | 3.664600  |
| 52 | 6 | 0 | -1.456205 | 4.079833  | 0.603086  | 109 | 1  | 0 | -1.462690 | -0.777183 | 2.895063  |
| 53 | 6 | 0 | 0.290069  | 5.643270  | 0.838077  | 110 | 6  | 0 | -4.661292 | 1.888510  | -1.345371 |
| 54 | 1 | 0 | -1.306444 | 6.958229  | 1.568575  | 111 | 1  | 0 | -4.028277 | 2.747826  | -1.114642 |
| 55 | 1 | 0 | -0.434965 | 6.141825  | 2.863916  | 112 | 6  | 0 | -6.065965 | 2.427311  | -1.643338 |
| 56 | 1 | 0 | 1.029440  | 4.993975  | 1.319953  | 113 | 1  | 0 | -6.751661 | 1.623964  | -1.933931 |
| 57 | 1 | 0 | 0.815520  | 6.508553  | 0.422636  | 114 | 1  | 0 | -6.487837 | 2.928990  | -0.767309 |
| 58 | 6 | 0 | -0.450733 | 4.820589  | -0.252999 | 115 | 1  | 0 | -6.029141 | 3.146811  | -2.467981 |
| 59 | 6 | 0 | -1.180663 | 5.791822  | -1.225066 | 116 | 6  | 0 | -4.064326 | 1.195385  | -2.576770 |

|     |    |   |           |           |           |    |   |   |           |           |           |
|-----|----|---|-----------|-----------|-----------|----|---|---|-----------|-----------|-----------|
| 117 | 1  | 0 | -4.007878 | 1.892255  | -3.419864 | 1  | 6 | 0 | 0.473628  | -2.222668 | 4.364956  |
| 118 | 1  | 0 | -3.051683 | 0.837117  | -2.365295 | 2  | 1 | 0 | 0.757919  | -1.214297 | 4.078649  |
| 119 | 1  | 0 | -4.691652 | 0.350061  | -2.889421 | 3  | 1 | 0 | 0.947297  | -2.593341 | 5.269104  |
| 120 | 6  | 0 | -6.537344 | -2.265671 | 0.730327  | 4  | 6 | 0 | -0.735896 | -2.758855 | 3.974959  |
| 121 | 1  | 0 | -6.454215 | -2.654518 | -0.293867 | 5  | 1 | 0 | -1.075829 | -3.657737 | 4.486706  |
| 122 | 6  | 0 | -7.977130 | -1.770981 | 0.932458  | 6  | 6 | 0 | -1.478926 | -2.364988 | 2.836597  |
| 123 | 1  | 0 | -8.691511 | -2.592173 | 0.810443  | 7  | 1 | 0 | -2.310982 | -2.976342 | 2.514629  |
| 124 | 1  | 0 | -8.095462 | -1.360394 | 1.941283  | 8  | 6 | 0 | -1.076647 | -1.293801 | 2.076482  |
| 125 | 1  | 0 | -8.232192 | -0.982397 | 0.218134  | 9  | 1 | 0 | -0.309104 | -0.611805 | 2.419591  |
| 126 | 6  | 0 | -6.232279 | -3.412773 | 1.692234  | 10 | 1 | 0 | -1.169522 | -0.020013 | 0.508327  |
| 127 | 1  | 0 | -6.421409 | -3.118684 | 2.730860  | 11 | 7 | 0 | -1.561812 | -0.893719 | 0.865309  |
| 128 | 1  | 0 | -6.878213 | -4.268503 | 1.472394  | 12 | 6 | 0 | -2.408010 | -1.626370 | 0.067460  |
| 129 | 1  | 0 | -5.190354 | -3.737625 | 1.610928  | 13 | 8 | 0 | -2.595626 | -1.005386 | -1.106545 |
| 130 | 6  | 0 | 1.694615  | 0.604669  | -4.305388 | 14 | 8 | 0 | -2.892505 | -2.698510 | 0.366055  |
| 131 | 1  | 0 | 1.046706  | 1.438701  | -4.022780 | 15 | 6 | 0 | -3.500586 | -1.664446 | -2.013044 |
| 132 | 6  | 0 | 0.782951  | -0.590306 | -4.592477 | 16 | 1 | 0 | -3.218652 | -1.280170 | -2.994974 |
| 133 | 1  | 0 | 0.084353  | -0.340700 | -5.398579 | 17 | 1 | 0 | -3.317560 | -2.741210 | -1.977330 |
| 134 | 1  | 0 | 1.346560  | -1.475418 | -4.908539 | 18 | 6 | 0 | -4.927992 | -1.319542 | -1.677648 |
| 135 | 1  | 0 | 0.202389  | -0.837186 | -3.706366 | 19 | 6 | 0 | -5.503337 | -0.158088 | -2.197664 |
| 136 | 6  | 0 | 2.460571  | 0.978359  | -5.583349 | 20 | 6 | 0 | -5.661424 | -2.096710 | -0.777779 |
| 137 | 1  | 0 | 1.761772  | 1.210338  | -6.394205 | 21 | 6 | 0 | -6.767800 | 0.258007  | -1.793266 |
| 138 | 1  | 0 | 3.113361  | 1.842971  | -5.437678 | 22 | 1 | 0 | -4.945760 | 0.445896  | -2.910571 |
| 139 | 1  | 0 | 3.089300  | 0.141463  | -5.909083 | 23 | 6 | 0 | -6.931302 | -1.698927 | -0.369788 |
| 140 | 6  | 0 | 4.117307  | 1.997796  | -0.000322 | 24 | 1 | 0 | -5.215791 | -2.995638 | -0.364837 |
| 141 | 1  | 0 | 3.151155  | 2.377305  | 0.350610  | 25 | 6 | 0 | -7.462314 | -0.514679 | -0.868784 |
| 142 | 6  | 0 | 4.833945  | 1.384267  | 1.204382  | 26 | 1 | 0 | -7.206640 | 1.172421  | -2.176523 |
| 143 | 1  | 0 | 4.823839  | 2.083708  | 2.046147  | 27 | 1 | 0 | -7.498020 | -2.288208 | 0.342706  |
| 144 | 1  | 0 | 4.356915  | 0.455838  | 1.533056  | 28 | 1 | 0 | 0.908732  | -1.604044 | -0.696977 |
| 145 | 1  | 0 | 5.884663  | 1.166213  | 0.980982  | 29 | 6 | 0 | -1.557479 | -4.268836 | -3.729150 |
| 146 | 6  | 0 | 4.942021  | 3.181932  | -0.528162 | 30 | 6 | 0 | -1.441739 | -4.964624 | -2.544608 |
| 147 | 1  | 0 | 5.905647  | 2.823865  | -0.908198 | 31 | 6 | 0 | -0.762728 | -4.396667 | -1.447663 |
| 148 | 1  | 0 | 4.429453  | 3.709761  | -1.336082 | 32 | 6 | 0 | -0.213479 | -3.106452 | -1.584399 |
| 149 | 1  | 0 | 5.139102  | 3.897056  | 0.277798  | 33 | 6 | 0 | -0.355555 | -2.382644 | -2.784984 |
| 150 | 6  | 0 | 5.301831  | -2.318746 | -2.318427 | 34 | 6 | 0 | -1.010767 | -2.974426 | -3.843824 |
| 151 | 1  | 0 | 5.524368  | -2.604402 | -1.280498 | 35 | 1 | 0 | -1.012596 | -6.049586 | -0.059506 |
| 152 | 6  | 0 | 6.632139  | -1.995303 | -3.012053 | 36 | 1 | 0 | -2.071741 | -4.713942 | -4.574369 |
| 153 | 1  | 0 | 7.289046  | -2.871734 | -3.027528 | 37 | 1 | 0 | -1.864361 | -5.960026 | -2.440309 |
| 154 | 1  | 0 | 6.450196  | -1.684517 | -4.046823 | 38 | 6 | 0 | -0.583598 | -5.060092 | -0.191444 |
| 155 | 1  | 0 | 7.154660  | -1.179418 | -2.503855 | 39 | 1 | 0 | 0.060701  | -1.380369 | -2.845823 |
| 156 | 6  | 0 | 4.618878  | -3.509778 | -2.991827 | 40 | 1 | 0 | -1.111821 | -2.430347 | -4.777872 |
| 157 | 1  | 0 | 5.211517  | -4.418781 | -2.847045 | 41 | 6 | 0 | 0.675833  | -3.163300 | 0.652514  |
| 158 | 1  | 0 | 3.618753  | -3.679801 | -2.579645 | 42 | 6 | 0 | 0.101104  | -4.469976 | 0.820350  |
| 159 | 1  | 0 | 4.521301  | -3.351608 | -4.071670 | 43 | 1 | 0 | 0.222951  | -4.969066 | 1.774042  |
| 160 | 35 | 0 | 5.218327  | 0.443312  | 4.699741  | 44 | 7 | 0 | 0.475379  | -2.553411 | -0.531025 |

-----

**TSs(Br)**

M06-2X/6-31g(d) in gas phase

SCF Done: E(RM062X) = -6188.377458 hartree

Sum of electronic and thermal Free Energies = -6187.114515 hartree

The number of imaginary frequency = 1

Imaginary frequency = -344.29

-----

| Center Number | Atomic Number | Atomic Type | Coordinates (Angstroms) |   |   |
|---------------|---------------|-------------|-------------------------|---|---|
|               |               |             | X                       | Y | Z |

-----

|    |   |   |          |           |           |
|----|---|---|----------|-----------|-----------|
| 45 | 6 | 0 | 1.461871 | -2.492086 | 1.630334  |
| 46 | 1 | 0 | 1.845776 | -1.511310 | 1.358089  |
| 47 | 6 | 0 | 1.793800 | -3.017325 | 2.863967  |
| 48 | 1 | 0 | 1.624913 | -4.064025 | 3.096854  |
| 49 | 1 | 0 | 2.628141 | -2.564813 | 3.391330  |
| 50 | 6 | 0 | 4.735524 | 4.153419  | -3.224596 |
| 51 | 6 | 0 | 4.947420 | 2.834692  | -2.512961 |
| 52 | 6 | 0 | 4.083306 | 2.730233  | -1.418612 |
| 53 | 6 | 0 | 3.426807 | 4.666162  | -2.589324 |
| 54 | 1 | 0 | 5.567128 | 4.845449  | -3.042072 |
| 55 | 1 | 0 | 4.657673 | 4.026679  | -4.308705 |
| 56 | 1 | 0 | 2.564567 | 4.244981  | -3.117697 |
| 57 | 1 | 0 | 3.334913 | 5.756623  | -2.598248 |

|     |    |   |           |           |           |                                                            |    |   |           |           |           |
|-----|----|---|-----------|-----------|-----------|------------------------------------------------------------|----|---|-----------|-----------|-----------|
| 58  | 6  | 0 | 3.455246  | 4.086006  | -1.149311 | 115                                                        | 1  | 0 | 7.373986  | 0.156949  | 1.889401  |
| 59  | 6  | 0 | 4.408891  | 4.949976  | -0.270301 | 116                                                        | 6  | 0 | 4.094535  | 0.470660  | 3.031250  |
| 60  | 6  | 0 | 2.151938  | 4.282333  | -0.395022 | 117                                                        | 1  | 0 | 4.235030  | 1.397694  | 3.597541  |
| 61  | 6  | 0 | 3.544560  | 6.139267  | 0.177577  | 118                                                        | 1  | 0 | 3.106925  | 0.504680  | 2.560466  |
| 62  | 1  | 0 | 5.318511  | 5.240077  | -0.804391 | 119                                                        | 1  | 0 | 4.120226  | -0.358869 | 3.749529  |
| 63  | 1  | 0 | 4.701888  | 4.358598  | 0.604586  | 120                                                        | 6  | 0 | 4.715531  | -4.658053 | 1.779737  |
| 64  | 6  | 0 | 2.180069  | 5.501542  | 0.290299  | 121                                                        | 1  | 0 | 4.388664  | -4.450018 | 2.808640  |
| 65  | 1  | 0 | 3.879212  | 6.579514  | 1.121561  | 122                                                        | 6  | 0 | 6.142535  | -5.218739 | 1.847582  |
| 66  | 1  | 0 | 3.548873  | 6.940168  | -0.573006 | 123                                                        | 1  | 0 | 6.170641  | -6.154436 | 2.416473  |
| 67  | 6  | 0 | 5.827881  | 1.805944  | -2.816803 | 124                                                        | 1  | 0 | 6.514741  | -5.420005 | 0.836951  |
| 68  | 6  | 0 | 5.802912  | 0.649528  | -2.040595 | 125                                                        | 1  | 0 | 6.823593  | -4.504391 | 2.319410  |
| 69  | 6  | 0 | 4.859835  | 0.463039  | -1.022880 | 126                                                        | 6  | 0 | 3.760151  | -5.694235 | 1.185115  |
| 70  | 6  | 0 | 3.989977  | 1.525129  | -0.734038 | 127                                                        | 1  | 0 | 4.119361  | -6.054828 | 0.215232  |
| 71  | 1  | 0 | 6.523717  | 1.894597  | -3.646395 | 128                                                        | 1  | 0 | 3.681406  | -6.563629 | 1.845975  |
| 72  | 1  | 0 | 6.498003  | -0.158642 | -2.252355 | 129                                                        | 1  | 0 | 2.759752  | -5.274237 | 1.035734  |
| 73  | 6  | 0 | 1.028252  | 3.469038  | -0.302588 | 130                                                        | 6  | 0 | -0.749476 | 2.952004  | 3.213092  |
| 74  | 6  | 0 | -0.087595 | 3.870231  | 0.449010  | 131                                                        | 1  | 0 | 0.145345  | 3.475350  | 2.869265  |
| 75  | 6  | 0 | -0.057099 | 5.136462  | 1.045439  | 132                                                        | 6  | 0 | -0.262492 | 1.705940  | 3.964884  |
| 76  | 6  | 0 | 1.068343  | 5.951836  | 0.986610  | 133                                                        | 1  | 0 | 0.276646  | 2.003604  | 4.871344  |
| 77  | 1  | 0 | -0.932101 | 5.458470  | 1.603555  | 134                                                        | 1  | 0 | -1.094559 | 1.059217  | 4.269691  |
| 78  | 1  | 0 | 1.083134  | 6.908532  | 1.501025  | 135                                                        | 1  | 0 | 0.417966  | 1.139708  | 3.324283  |
| 79  | 8  | 0 | 3.044489  | 1.370785  | 0.258150  | 136                                                        | 6  | 0 | -1.512621 | 3.886050  | 4.162173  |
| 80  | 8  | 0 | 1.546259  | -0.171587 | -1.207127 | 137                                                        | 1  | 0 | -0.871895 | 4.193465  | 4.995400  |
| 81  | 8  | 0 | 0.781972  | 0.728656  | 1.104567  | 138                                                        | 1  | 0 | -1.862822 | 4.786466  | 3.647620  |
| 82  | 15 | 0 | 1.526489  | 0.924719  | -0.174543 | 139                                                        | 1  | 0 | -2.391238 | 3.383955  | 4.582566  |
| 83  | 8  | 0 | 1.019166  | 2.261900  | -0.974626 | 140                                                        | 6  | 0 | -1.822836 | 2.976300  | -1.837475 |
| 84  | 6  | 0 | -1.275126 | 2.993464  | 0.679908  | 141                                                        | 1  | 0 | -0.901387 | 3.561959  | -1.876308 |
| 85  | 6  | 0 | -1.604527 | 2.601841  | 1.999014  | 142                                                        | 6  | 0 | -1.615026 | 1.726225  | -2.700728 |
| 86  | 6  | 0 | -2.103321 | 2.603235  | -0.389471 | 143                                                        | 1  | 0 | -1.356367 | 2.011641  | -3.726393 |
| 87  | 6  | 0 | -2.770828 | 1.865687  | 2.218036  | 144                                                        | 1  | 0 | -0.809820 | 1.102500  | -2.300769 |
| 88  | 6  | 0 | -3.255051 | 1.864741  | -0.114757 | 145                                                        | 1  | 0 | -2.531206 | 1.123742  | -2.736579 |
| 89  | 6  | 0 | -3.615300 | 1.489307  | 1.175880  | 146                                                        | 6  | 0 | -2.946968 | 3.850752  | -2.407064 |
| 90  | 1  | 0 | -3.015421 | 1.567401  | 3.235301  | 147                                                        | 1  | 0 | -3.899311 | 3.307983  | -2.427567 |
| 91  | 1  | 0 | -3.899525 | 1.562486  | -0.937542 | 148                                                        | 1  | 0 | -3.088889 | 4.752167  | -1.803274 |
| 92  | 6  | 0 | 4.774758  | -0.841196 | -0.298000 | 149                                                        | 1  | 0 | -2.712925 | 4.155353  | -3.432761 |
| 93  | 6  | 0 | 4.556684  | -2.033629 | -1.022268 | 150                                                        | 6  | 0 | -4.900075 | 0.711257  | 1.385157  |
| 94  | 6  | 0 | 4.952172  | -0.904887 | 1.102809  | 151                                                        | 1  | 0 | -5.078170 | 0.157376  | 0.457552  |
| 95  | 6  | 0 | 4.520216  | -3.252272 | -0.338255 | 152                                                        | 6  | 0 | -4.829859 | -0.310148 | 2.519957  |
| 96  | 6  | 0 | 4.928368  | -2.149418 | 1.730796  | 153                                                        | 1  | 0 | -4.733071 | 0.176143  | 3.496993  |
| 97  | 6  | 0 | 4.707071  | -3.335661 | 1.036695  | 154                                                        | 1  | 0 | -5.749269 | -0.905427 | 2.539563  |
| 98  | 1  | 0 | 4.341690  | -4.160713 | -0.908793 | 155                                                        | 1  | 0 | -3.983729 | -0.994178 | 2.394275  |
| 99  | 1  | 0 | 5.085120  | -2.199379 | 2.808433  | 156                                                        | 6  | 0 | -6.086211 | 1.664969  | 1.577489  |
| 100 | 6  | 0 | 4.358812  | -2.076656 | -2.532949 | 157                                                        | 1  | 0 | -7.029239 | 1.109038  | 1.627229  |
| 101 | 1  | 0 | 4.356294  | -1.054481 | -2.915130 | 158                                                        | 1  | 0 | -5.970693 | 2.240736  | 2.503084  |
| 102 | 6  | 0 | 2.999065  | -2.672966 | -2.901890 | 159                                                        | 1  | 0 | -6.154202 | 2.373106  | 0.744862  |
| 103 | 1  | 0 | 2.879483  | -2.711427 | -3.990501 | 160                                                        | 35 | 0 | -9.151380 | 0.072471  | -0.254078 |
| 104 | 1  | 0 | 2.870782  | -3.690608 | -2.513979 | -----                                                      |    |   |           |           |           |
| 105 | 1  | 0 | 2.216427  | -2.035998 | -2.490773 | <b>TSr(NO<sub>2</sub>)</b>                                 |    |   |           |           |           |
| 106 | 6  | 0 | 5.500879  | -2.840014 | -3.215159 | M06-2X/6-31g(d) in gas phase                               |    |   |           |           |           |
| 107 | 1  | 0 | 5.383164  | -2.811882 | -4.303588 | SCF Done: E(RM062X) = -3821.623046 hartree                 |    |   |           |           |           |
| 108 | 1  | 0 | 6.478013  | -2.414867 | -2.963706 | Sum of electronic and thermal Free Energies = -3820.350334 |    |   |           |           |           |
| 109 | 1  | 0 | 5.510472  | -3.891519 | -2.906777 | hartree                                                    |    |   |           |           |           |
| 110 | 6  | 0 | 5.200476  | 0.315295  | 1.978428  | The number of imaginary frequency = 1                      |    |   |           |           |           |
| 111 | 1  | 0 | 5.188767  | 1.208649  | 1.351053  | Imaginary frequency = -350.22                              |    |   |           |           |           |
| 112 | 6  | 0 | 6.582818  | 0.245349  | 2.640215  | -----                                                      |    |   |           |           |           |
| 113 | 1  | 0 | 6.767832  | 1.148493  | 3.231374  | Center    Atomic    Atomic    Coordinates (Angstroms)      |    |   |           |           |           |
| 114 | 1  | 0 | 6.660105  | -0.615541 | 3.313430  |                                                            |    |   |           |           |           |

| Number | Number | Type | X         | Y         | Z         |     |    |   |           |           |           |
|--------|--------|------|-----------|-----------|-----------|-----|----|---|-----------|-----------|-----------|
| 1      | 6      | 0    | -4.325183 | -3.083021 | -2.818907 | 56  | 1  | 0 | 1.007320  | 4.996653  | 1.429031  |
| 2      | 1      | 0    | -4.315119 | -2.021405 | -2.589700 | 57  | 1  | 0 | 0.881268  | 6.502127  | 0.500719  |
| 3      | 1      | 0    | -4.968084 | -3.371373 | -3.645454 | 58  | 6  | 0 | -0.321871 | 4.810116  | -0.272424 |
| 4      | 6      | 0    | -4.021018 | -4.011080 | -1.844710 | 59  | 6  | 0 | -0.958894 | 5.773213  | -1.315609 |
| 5      | 1      | 0    | -4.285673 | -5.049860 | -2.035548 | 60  | 6  | 0 | 0.723068  | 4.125176  | -1.135570 |
| 6      | 6      | 0    | -3.221410 | -3.767812 | -0.705666 | 61  | 6  | 0 | 0.219159  | 6.210237  | -2.199884 |
| 7      | 1      | 0    | -2.897251 | -4.607590 | -0.105374 | 62  | 1  | 0 | -1.489689 | 6.604918  | -0.842879 |
| 8      | 6      | 0    | -2.747293 | -2.510771 | -0.404943 | 63  | 1  | 0 | -1.679859 | 5.204975  | -1.914249 |
| 9      | 1      | 0    | -3.137608 | -1.629849 | -0.906433 | 64  | 6  | 0 | 1.102969  | 4.985476  | -2.170995 |
| 10     | 1      | 0    | -1.567758 | -1.195395 | 0.683734  | 65  | 1  | 0 | -0.085470 | 6.479892  | -3.215531 |
| 11     | 7      | 0    | -1.830944 | -2.190785 | 0.547723  | 66  | 1  | 0 | 0.735888  | 7.080599  | -1.775735 |
| 12     | 6      | 0    | -1.053901 | -3.091919 | 1.244899  | 67  | 6  | 0 | -2.940205 | 4.505336  | 2.309375  |
| 13     | 8      | 0    | -0.177281 | -2.396816 | 1.979674  | 68  | 6  | 0 | -3.619593 | 3.339387  | 1.968219  |
| 14     | 8      | 0    | -1.117809 | -4.300065 | 1.209433  | 69  | 6  | 0 | -3.163146 | 2.476899  | 0.962833  |
| 15     | 6      | 0    | 0.676787  | -3.137240 | 2.833958  | 70  | 6  | 0 | -2.035879 | 2.872330  | 0.229409  |
| 16     | 1      | 0    | 0.074596  | -3.655032 | 3.590549  | 71  | 1  | 0 | -3.285433 | 5.119536  | 3.136179  |
| 17     | 1      | 0    | 1.214003  | -3.896621 | 2.254619  | 72  | 1  | 0 | -4.510390 | 3.053924  | 2.520200  |
| 18     | 6      | 0    | 1.626908  | -2.159283 | 3.474882  | 73  | 6  | 0 | 1.334711  | 2.879668  | -1.013044 |
| 19     | 6      | 0    | 1.517267  | -0.784809 | 3.244805  | 74  | 6  | 0 | 2.392649  | 2.522038  | -1.861946 |
| 20     | 6      | 0    | 2.632658  | -2.651534 | 4.312580  | 75  | 6  | 0 | 2.799318  | 3.444834  | -2.834712 |
| 21     | 6      | 0    | 2.400714  | 0.091811  | 3.867198  | 76  | 6  | 0 | 2.152051  | 4.660914  | -3.017293 |
| 22     | 1      | 0    | 0.756013  | -0.397540 | 2.571023  | 77  | 1  | 0 | 3.640204  | 3.177870  | -3.467787 |
| 23     | 6      | 0    | 3.526808  | -1.787454 | 4.927911  | 78  | 1  | 0 | 2.459927  | 5.337071  | -3.809774 |
| 24     | 1      | 0    | 2.718303  | -3.722110 | 4.482049  | 79  | 8  | 0 | -1.541516 | 2.064349  | -0.778320 |
| 25     | 6      | 0    | 3.389735  | -0.424342 | 4.692205  | 80  | 8  | 0 | -0.690116 | 0.309224  | 0.915100  |
| 26     | 1      | 0    | 2.337408  | 1.161341  | 3.705146  | 81  | 8  | 0 | -0.081651 | 0.223360  | -1.617972 |
| 27     | 1      | 0    | 4.317077  | -2.143144 | 5.577268  | 82  | 15 | 0 | -0.355635 | 1.010912  | -0.365023 |
| 28     | 1      | 0    | 0.271481  | -1.374878 | -1.459565 | 83  | 8  | 0 | 0.902426  | 2.007323  | -0.026564 |
| 29     | 6      | 0    | 3.407507  | -4.201668 | 0.720817  | 84  | 6  | 0 | 3.123033  | 1.217544  | -1.793212 |
| 30     | 6      | 0    | 2.539211  | -4.995094 | -0.000953 | 85  | 6  | 0 | 3.022778  | 0.305302  | -2.861763 |
| 31     | 6      | 0    | 1.501586  | -4.409353 | -0.754321 | 86  | 6  | 0 | 4.019057  | 0.964165  | -0.729353 |
| 32     | 6      | 0    | 1.373200  | -3.004108 | -0.752216 | 87  | 6  | 0 | 3.812165  | -0.849898 | -2.842369 |
| 33     | 6      | 0    | 2.256790  | -2.194648 | -0.016773 | 88  | 6  | 0 | 4.801885  | -0.187705 | -0.773797 |
| 34     | 6      | 0    | 3.261741  | -2.799204 | 0.708850  | 89  | 6  | 0 | 4.709617  | -1.112178 | -1.814998 |
| 35     | 1      | 0    | 0.645902  | -6.239031 | -1.551088 | 90  | 1  | 0 | 3.724185  | -1.553765 | -3.665840 |
| 36     | 1      | 0    | 4.207713  | -4.653783 | 1.298044  | 91  | 1  | 0 | 5.505052  | -0.389310 | 0.031296  |
| 37     | 1      | 0    | 2.642679  | -6.076501 | -0.002909 | 92  | 6  | 0 | -3.883343 | 1.185955  | 0.737131  |
| 38     | 6      | 0    | 0.566248  | -5.155500 | -1.539922 | 93  | 6  | 0 | -4.027921 | 0.274267  | 1.806511  |
| 39     | 1      | 0    | 2.147251  | -1.111763 | -0.045617 | 94  | 6  | 0 | -4.522715 | 0.916585  | -0.494818 |
| 40     | 1      | 0    | 3.948689  | -2.178406 | 1.277541  | 95  | 6  | 0 | -4.834258 | -0.856135 | 1.635331  |
| 41     | 6      | 0    | -0.530364 | -3.104708 | -2.224630 | 96  | 6  | 0 | -5.326632 | -0.218759 | -0.606053 |
| 42     | 6      | 0    | -0.408346 | -4.533774 | -2.252575 | 97  | 6  | 0 | -5.510960 | -1.115016 | 0.448005  |
| 43     | 1      | 0    | -1.123268 | -5.103487 | -2.833401 | 98  | 1  | 0 | -4.935998 | -1.547140 | 2.467784  |
| 44     | 7      | 0    | 0.359289  | -2.426256 | -1.477226 | 99  | 1  | 0 | -5.846337 | -0.408193 | -1.545656 |
| 45     | 6      | 0    | -1.503996 | -2.347111 | -2.942492 | 100 | 6  | 0 | -3.375564 | 0.472135  | 3.171594  |
| 46     | 1      | 0    | -1.461522 | -1.269771 | -2.800528 | 101 | 1  | 0 | -2.742042 | 1.360313  | 3.127775  |
| 47     | 6      | 0    | -2.426703 | -2.880345 | -3.819100 | 102 | 6  | 0 | -4.440501 | 0.687605  | 4.256172  |
| 48     | 1      | 0    | -2.355225 | -3.910529 | -4.151639 | 103 | 1  | 0 | -5.049093 | -0.213990 | 4.389400  |
| 49     | 1      | 0    | -2.902588 | -2.209320 | -4.527107 | 104 | 1  | 0 | -3.965511 | 0.914447  | 5.216269  |
| 50     | 6      | 0    | -0.875166 | 6.027958  | 1.771304  | 105 | 1  | 0 | -5.120380 | 1.508247  | 4.007234  |
| 51     | 6      | 0    | -1.814778 | 4.858464  | 1.578930  | 106 | 6  | 0 | -2.459056 | -0.694678 | 3.553187  |
| 52     | 6      | 0    | -1.403183 | 4.078592  | 0.495050  | 107 | 1  | 0 | -2.071159 | -0.546395 | 4.567458  |
| 53     | 6      | 0    | 0.317370  | 5.641987  | 0.874172  | 108 | 1  | 0 | -2.988108 | -1.655435 | 3.536134  |
| 54     | 1      | 0    | -1.336441 | 6.967319  | 1.441397  | 109 | 1  | 0 | -1.611180 | -0.744548 | 2.870058  |
| 55     | 1      | 0    | -0.590588 | 6.161524  | 2.819248  | 110 | 6  | 0 | -4.410489 | 1.829001  | -1.707964 |
|        |        |      |           |           |           | 111 | 1  | 0 | -3.804539 | 2.696645  | -1.439085 |
|        |        |      |           |           |           | 112 | 6  | 0 | -5.783751 | 2.353187  | -2.145745 |

|     |   |   |           |           |           |
|-----|---|---|-----------|-----------|-----------|
| 113 | 1 | 0 | -6.436655 | 1.540135  | -2.481344 |
| 114 | 1 | 0 | -6.286650 | 2.870726  | -1.323376 |
| 115 | 1 | 0 | -5.673437 | 3.055544  | -2.978522 |
| 116 | 6 | 0 | -3.700286 | 1.111708  | -2.863151 |
| 117 | 1 | 0 | -3.573400 | 1.788142  | -3.715144 |
| 118 | 1 | 0 | -2.708221 | 0.768328  | -2.552739 |
| 119 | 1 | 0 | -4.290607 | 0.252651  | -3.209116 |
| 120 | 6 | 0 | -6.460237 | -2.287511 | 0.274166  |
| 121 | 1 | 0 | -6.278399 | -2.703179 | -0.726505 |
| 122 | 6 | 0 | -7.912603 | -1.790404 | 0.322162  |
| 123 | 1 | 0 | -8.612123 | -2.616021 | 0.153185  |
| 124 | 1 | 0 | -8.127995 | -1.353490 | 1.303482  |
| 125 | 1 | 0 | -8.096662 | -1.021522 | -0.434208 |
| 126 | 6 | 0 | -6.251350 | -3.408276 | 1.291094  |
| 127 | 1 | 0 | -6.539569 | -3.086625 | 2.298298  |
| 128 | 1 | 0 | -6.874047 | -4.270366 | 1.032736  |
| 129 | 1 | 0 | -5.206902 | -3.733649 | 1.319784  |
| 130 | 6 | 0 | 2.140458  | 0.552486  | -4.079679 |
| 131 | 1 | 0 | 1.475622  | 1.391259  | -3.856432 |
| 132 | 6 | 0 | 1.249222  | -0.644049 | -4.420813 |
| 133 | 1 | 0 | 0.618753  | -0.404748 | -5.284194 |
| 134 | 1 | 0 | 1.832468  | -1.535770 | -4.676946 |
| 135 | 1 | 0 | 0.598011  | -0.874682 | -3.580208 |
| 136 | 6 | 0 | 3.002151  | 0.911672  | -5.299389 |
| 137 | 1 | 0 | 2.367487  | 1.136369  | -6.163266 |
| 138 | 1 | 0 | 3.643206  | 1.777249  | -5.112614 |
| 139 | 1 | 0 | 3.652405  | 0.071013  | -5.568104 |
| 140 | 6 | 0 | 4.187269  | 1.955350  | 0.415503  |
| 141 | 1 | 0 | 3.195732  | 2.350702  | 0.660606  |
| 142 | 6 | 0 | 4.751539  | 1.317002  | 1.687330  |
| 143 | 1 | 0 | 4.654693  | 2.003792  | 2.533930  |
| 144 | 1 | 0 | 4.220747  | 0.392401  | 1.938120  |
| 145 | 1 | 0 | 5.816405  | 1.080821  | 1.580447  |
| 146 | 6 | 0 | 5.084144  | 3.126604  | -0.011934 |
| 147 | 1 | 0 | 6.078581  | 2.755046  | -0.284251 |
| 148 | 1 | 0 | 4.670570  | 3.660760  | -0.871316 |
| 149 | 1 | 0 | 5.200387  | 3.838275  | 0.812274  |
| 150 | 6 | 0 | 5.592914  | -2.345642 | -1.802181 |
| 151 | 1 | 0 | 5.752079  | -2.613776 | -0.748038 |
| 152 | 6 | 0 | 6.961988  | -2.025874 | -2.417527 |
| 153 | 1 | 0 | 7.622695  | -2.898633 | -2.377831 |
| 154 | 1 | 0 | 6.843132  | -1.733063 | -3.466625 |
| 155 | 1 | 0 | 7.448054  | -1.198819 | -1.891595 |
| 156 | 6 | 0 | 4.957837  | -3.550978 | -2.496830 |
| 157 | 1 | 0 | 5.545520  | -4.454041 | -2.303027 |
| 158 | 1 | 0 | 3.935762  | -3.720611 | -2.142475 |
| 159 | 1 | 0 | 4.923815  | -3.409957 | -3.582832 |
| 160 | 7 | 0 | 4.337355  | 0.499091  | 5.330193  |
| 161 | 8 | 0 | 5.204904  | 0.018307  | 6.037187  |
| 162 | 8 | 0 | 4.199918  | 1.690286  | 5.114858  |

-----

**TSs(NO<sub>2</sub>)**

M06-2X/6-31g(d) in gas phase

SCF Done: E(RM062X) = -3821.619857 hartree

Sum of electronic and thermal Free Energies = -3820.345497 hartree

The number of imaginary frequency = 1  
Imaginary frequency = -348.09

| -----         |               |             |                         |           |           |
|---------------|---------------|-------------|-------------------------|-----------|-----------|
| Center Number | Atomic Number | Atomic Type | Coordinates (Angstroms) |           |           |
|               |               |             | X                       | Y         | Z         |
| -----         |               |             |                         |           |           |
| 1             | 6             | 0           | 0.297477                | -2.276815 | 4.364973  |
| 2             | 1             | 0           | 0.578428                | -1.261582 | 4.100389  |
| 3             | 1             | 0           | 0.767716                | -2.662102 | 5.264800  |
| 4             | 6             | 0           | -0.910178               | -2.808038 | 3.961276  |
| 5             | 1             | 0           | -1.251903               | -3.715563 | 4.456093  |
| 6             | 6             | 0           | -1.646152               | -2.395160 | 2.825121  |
| 7             | 1             | 0           | -2.475363               | -3.001812 | 2.487329  |
| 8             | 6             | 0           | -1.235796               | -1.314014 | 2.084773  |
| 9             | 1             | 0           | -0.473590               | -0.635673 | 2.445751  |
| 10            | 1             | 0           | -1.322055               | -0.009778 | 0.540771  |
| 11            | 7             | 0           | -1.712059               | -0.893915 | 0.875375  |
| 12            | 6             | 0           | -2.532456               | -1.621910 | 0.053213  |
| 13            | 8             | 0           | -2.741547               | -0.966263 | -1.099277 |
| 14            | 8             | 0           | -2.992009               | -2.715931 | 0.313724  |
| 15            | 6             | 0           | -3.646306               | -1.605222 | -2.013159 |
| 16            | 1             | 0           | -3.367689               | -1.210571 | -2.991809 |
| 17            | 1             | 0           | -3.474167               | -2.684244 | -1.993962 |
| 18            | 6             | 0           | -5.076583               | -1.258655 | -1.675178 |
| 19            | 6             | 0           | -5.682068               | -0.148760 | -2.272244 |
| 20            | 6             | 0           | -5.791053               | -2.011682 | -0.737382 |
| 21            | 6             | 0           | -6.972775               | 0.232365  | -1.925218 |
| 22            | 1             | 0           | -5.131823               | 0.431759  | -3.008856 |
| 23            | 6             | 0           | -7.082498               | -1.644635 | -0.375849 |
| 24            | 1             | 0           | -5.317181               | -2.870151 | -0.273415 |
| 25            | 6             | 0           | -7.642784               | -0.523529 | -0.972918 |
| 26            | 1             | 0           | -7.458102               | 1.094247  | -2.366355 |
| 27            | 1             | 0           | -7.651838               | -2.201061 | 0.358751  |
| 28            | 1             | 0           | 0.740517                | -1.608859 | -0.695455 |
| 29            | 6             | 0           | -1.721655               | -4.268914 | -3.735606 |
| 30            | 6             | 0           | -1.593333               | -4.973578 | -2.557575 |
| 31            | 6             | 0           | -0.910855               | -4.410209 | -1.460489 |
| 32            | 6             | 0           | -0.371685               | -3.114995 | -1.590084 |
| 33            | 6             | 0           | -0.524546               | -2.383049 | -2.784557 |
| 34            | 6             | 0           | -1.182806               | -2.970605 | -3.843971 |
| 35            | 1             | 0           | -1.141540               | -6.075675 | -0.084259 |
| 36            | 1             | 0           | -2.238508               | -4.710662 | -4.581003 |
| 37            | 1             | 0           | -2.009140               | -5.972375 | -2.458683 |
| 38            | 6             | 0           | -0.722897               | -5.080917 | -0.209735 |
| 39            | 1             | 0           | -0.114172               | -1.378007 | -2.840218 |
| 40            | 1             | 0           | -1.291874               | -2.420500 | -4.773617 |
| 41            | 6             | 0           | 0.517202                | -3.176952 | 0.646340  |
| 42            | 6             | 0           | -0.044155               | -4.490245 | 0.806015  |
| 43            | 1             | 0           | 0.083148                | -4.994470 | 1.756292  |
| 44            | 7             | 0           | 0.314148                | -2.562967 | -0.534472 |
| 45            | 6             | 0           | 1.292849                | -2.502076 | 1.630531  |
| 46            | 1             | 0           | 1.667410                | -1.515842 | 1.364748  |
| 47            | 6             | 0           | 1.629300                | -3.033329 | 2.860918  |
| 48            | 1             | 0           | 1.475816                | -4.084761 | 3.082894  |
| 49            | 1             | 0           | 2.458124                | -2.575025 | 3.392119  |
| 50            | 6             | 0           | 4.501841                | 4.182739  | -3.233403 |
| 51            | 6             | 0           | 4.728961                | 2.865699  | -2.523271 |

|     |    |   |           |           |           |     |   |   |           |           |           |
|-----|----|---|-----------|-----------|-----------|-----|---|---|-----------|-----------|-----------|
| 52  | 6  | 0 | 3.870390  | 2.752930  | -1.425476 | 108 | 1 | 0 | 6.307463  | -2.374936 | -2.978920 |
| 53  | 6  | 0 | 3.191109  | 4.683239  | -2.592363 | 109 | 1 | 0 | 5.349279  | -3.857656 | -2.922240 |
| 54  | 1  | 0 | 5.327822  | 4.882267  | -3.054138 | 110 | 6 | 0 | 5.018158  | 0.342632  | 1.967261  |
| 55  | 1  | 0 | 4.420497  | 4.055798  | -4.317214 | 111 | 1 | 0 | 4.998781  | 1.236943  | 1.341434  |
| 56  | 1  | 0 | 2.330553  | 4.254625  | -3.117502 | 112 | 6 | 0 | 6.403490  | 0.279715  | 2.623554  |
| 57  | 1  | 0 | 3.089389  | 5.772821  | -2.600360 | 113 | 1 | 0 | 6.585516  | 1.182921  | 3.215516  |
| 58  | 6  | 0 | 3.230836  | 4.102616  | -1.152759 | 114 | 1 | 0 | 6.488408  | -0.581882 | 3.294930  |
| 59  | 6  | 0 | 4.180381  | 4.974736  | -0.277287 | 115 | 1 | 0 | 7.192212  | 0.197216  | 1.869517  |
| 60  | 6  | 0 | 1.929101  | 4.286242  | -0.392198 | 116 | 6 | 0 | 3.915523  | 0.489701  | 3.024697  |
| 61  | 6  | 0 | 3.307127  | 6.155482  | 0.175676  | 117 | 1 | 0 | 4.053587  | 1.416070  | 3.592650  |
| 62  | 1  | 0 | 5.084734  | 5.273764  | -0.815319 | 118 | 1 | 0 | 2.925890  | 0.519720  | 2.557952  |
| 63  | 1  | 0 | 4.482976  | 4.385408  | 0.595710  | 119 | 1 | 0 | 3.948201  | -0.341324 | 3.740915  |
| 64  | 6  | 0 | 1.949433  | 5.504703  | 0.294777  | 120 | 6 | 0 | 4.565707  | -4.633309 | 1.763304  |
| 65  | 1  | 0 | 3.642228  | 6.598345  | 1.118238  | 121 | 1 | 0 | 4.235606  | -4.429777 | 2.792073  |
| 66  | 1  | 0 | 3.299807  | 6.956801  | -0.574396 | 122 | 6 | 0 | 5.998059  | -5.180125 | 1.832335  |
| 67  | 6  | 0 | 5.617671  | 1.845051  | -2.830631 | 123 | 1 | 0 | 6.034492  | -6.116137 | 2.400193  |
| 68  | 6  | 0 | 5.606174  | 0.687980  | -2.054975 | 124 | 1 | 0 | 6.373471  | -5.376613 | 0.821962  |
| 69  | 6  | 0 | 4.668734  | 0.492254  | -1.033715 | 125 | 1 | 0 | 6.671539  | -4.459767 | 2.305860  |
| 70  | 6  | 0 | 3.791334  | 1.546950  | -0.741008 | 126 | 6 | 0 | 3.621499  | -5.678201 | 1.166171  |
| 71  | 1  | 0 | 6.309637  | 1.940335  | -3.662703 | 127 | 1 | 0 | 3.985598  | -6.034083 | 0.196376  |
| 72  | 1  | 0 | 6.307723  | -0.113700 | -2.270071 | 128 | 1 | 0 | 3.550529  | -6.549120 | 1.825883  |
| 73  | 6  | 0 | 0.813292  | 3.462702  | -0.294661 | 129 | 1 | 0 | 2.617109  | -5.268158 | 1.015834  |
| 74  | 6  | 0 | -0.301407 | 3.851577  | 0.464658  | 130 | 6 | 0 | -0.933896 | 2.921311  | 3.231030  |
| 75  | 6  | 0 | -0.279682 | 5.117220  | 1.062706  | 131 | 1 | 0 | -0.039146 | 3.438785  | 2.878134  |
| 76  | 6  | 0 | 0.837452  | 5.943453  | 0.998035  | 132 | 6 | 0 | -0.448012 | 1.675004  | 3.983015  |
| 77  | 1  | 0 | -1.154515 | 5.430724  | 1.625771  | 133 | 1 | 0 | 0.090748  | 1.972477  | 4.889677  |
| 78  | 1  | 0 | 0.845928  | 6.899704  | 1.513357  | 134 | 1 | 0 | -1.280782 | 1.028926  | 4.287415  |
| 79  | 8  | 0 | 2.851665  | 1.384907  | 0.255773  | 135 | 1 | 0 | 0.233117  | 1.108784  | 3.343279  |
| 80  | 8  | 0 | 1.357047  | -0.172000 | -1.198427 | 136 | 6 | 0 | -1.684693 | 3.861411  | 4.184210  |
| 81  | 8  | 0 | 0.600695  | 0.728556  | 1.116748  | 137 | 1 | 0 | -1.034197 | 4.170079  | 5.009263  |
| 82  | 15 | 0 | 1.336226  | 0.926152  | -0.167734 | 138 | 1 | 0 | -2.038082 | 4.760902  | 3.670488  |
| 83  | 8  | 0 | 0.810869  | 2.256086  | -0.967990 | 139 | 1 | 0 | -2.560031 | 3.363470  | 4.616313  |
| 84  | 6  | 0 | -1.481792 | 2.965924  | 0.701450  | 140 | 6 | 0 | -2.052859 | 2.968521  | -1.806699 |
| 85  | 6  | 0 | -1.800427 | 2.572859  | 2.024561  | 141 | 1 | 0 | -1.130924 | 3.553156  | -1.846640 |
| 86  | 6  | 0 | -2.321150 | 2.582616  | -0.359741 | 142 | 6 | 0 | -1.852430 | 1.728262  | -2.684762 |
| 87  | 6  | 0 | -2.971481 | 1.850563  | 2.251935  | 143 | 1 | 0 | -1.601449 | 2.024826  | -3.709104 |
| 88  | 6  | 0 | -3.479652 | 1.853274  | -0.076357 | 144 | 1 | 0 | -1.045752 | 1.098521  | -2.297259 |
| 89  | 6  | 0 | -3.833721 | 1.487246  | 1.217072  | 145 | 1 | 0 | -2.770774 | 1.129050  | -2.720056 |
| 90  | 1  | 0 | -3.218578 | 1.564938  | 3.273041  | 146 | 6 | 0 | -3.179566 | 3.850627  | -2.359097 |
| 91  | 1  | 0 | -4.137727 | 1.567827  | -0.894286 | 147 | 1 | 0 | -4.132851 | 3.309635  | -2.381030 |
| 92  | 6  | 0 | 4.595602  | -0.813540 | -0.310174 | 148 | 1 | 0 | -3.316892 | 4.744955  | -1.743913 |
| 93  | 6  | 0 | 4.385354  | -2.006754 | -1.035555 | 149 | 1 | 0 | -2.950822 | 4.167294  | -3.382278 |
| 94  | 6  | 0 | 4.774463  | -0.877703 | 1.090503  | 150 | 6 | 0 | -5.139832 | 0.760814  | 1.474295  |
| 95  | 6  | 0 | 4.357654  | -3.226404 | -0.352878 | 151 | 1 | 0 | -5.515697 | 0.432857  | 0.498046  |
| 96  | 6  | 0 | 4.758731  | -2.123044 | 1.717207  | 152 | 6 | 0 | -4.981053 | -0.480644 | 2.356352  |
| 97  | 6  | 0 | 4.545654  | -3.310115 | 1.021900  | 153 | 1 | 0 | -4.582679 | -0.221603 | 3.343561  |
| 98  | 1  | 0 | 4.185684  | -4.135447 | -0.924455 | 154 | 1 | 0 | -5.954741 | -0.960262 | 2.508165  |
| 99  | 1  | 0 | 4.916835  | -2.173137 | 2.794634  | 155 | 1 | 0 | -4.310278 | -1.218789 | 1.906382  |
| 100 | 6  | 0 | 4.186736  | -2.050099 | -2.546154 | 156 | 6 | 0 | -6.181026 | 1.715310  | 2.072256  |
| 101 | 1  | 0 | 4.177760  | -1.027869 | -2.928001 | 157 | 1 | 0 | -7.146693 | 1.209659  | 2.187573  |
| 102 | 6  | 0 | 2.830178  | -2.654240 | -2.913984 | 158 | 1 | 0 | -5.860296 | 2.066330  | 3.059793  |
| 103 | 1  | 0 | 2.709269  | -2.692461 | -4.002445 | 159 | 1 | 0 | -6.322150 | 2.591998  | 1.433152  |
| 104 | 1  | 0 | 2.708517  | -3.672939 | -2.526700 | 160 | 8 | 0 | -9.528933 | -0.730609 | 0.331327  |
| 105 | 1  | 0 | 2.044322  | -2.022410 | -2.501011 | 161 | 8 | 0 | -9.503788 | 0.817735  | -1.173498 |
| 106 | 6  | 0 | 5.332813  | -2.806031 | -3.229849 | 162 | 7 | 0 | -8.999789 | -0.113519 | -0.574501 |
| 107 | 1  | 0 | 5.213994  | -2.777870 | -4.318145 |     |   |   |           |           |           |



## 5. Hammett plot

**Table S6.** Summary of substituent effect

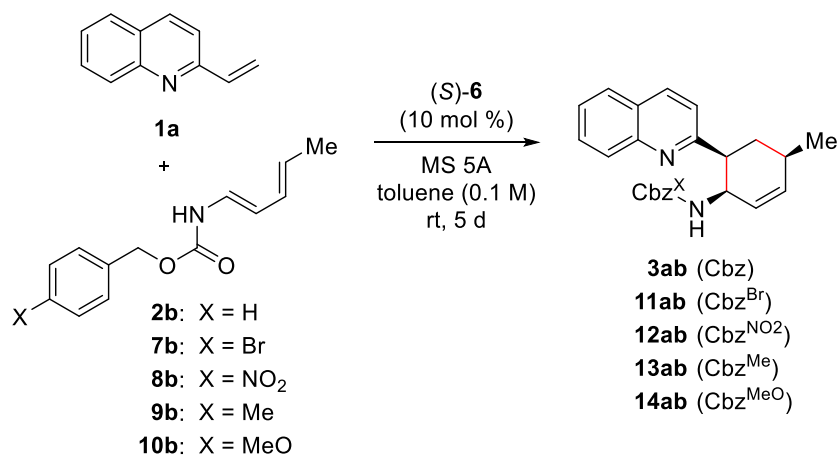

| X                             | product                                      | $\sigma_m$ | $\Delta\Delta G^\ddagger_{(\text{exp.})}$ |
|-------------------------------|----------------------------------------------|------------|-------------------------------------------|
| H ( <b>2b</b> )               | <b>3ab</b> (Cbz)                             | 0.115      | 1.80 [91% ee]                             |
| Br ( <b>7b</b> )              | <b>11ab</b> (Cbz <sup>Br</sup> )             | -0.070     | 2.15 [95% ee]                             |
| NO <sub>2</sub> ( <b>8b</b> ) | <b>12ab</b> (Cbz <sup>NO<sub>2</sub></sup> ) | 0.000      | 2.70 [98% ee]                             |
| Me ( <b>9b</b> )              | <b>13ab</b> (Cbz <sup>Me</sup> )             | 0.393      | 1.73 [90% ee]                             |
| MeO ( <b>10b</b> )            | <b>14ab</b> (Cbz <sup>MeO</sup> )            | 0.710      | 1.73 [90% ee]                             |

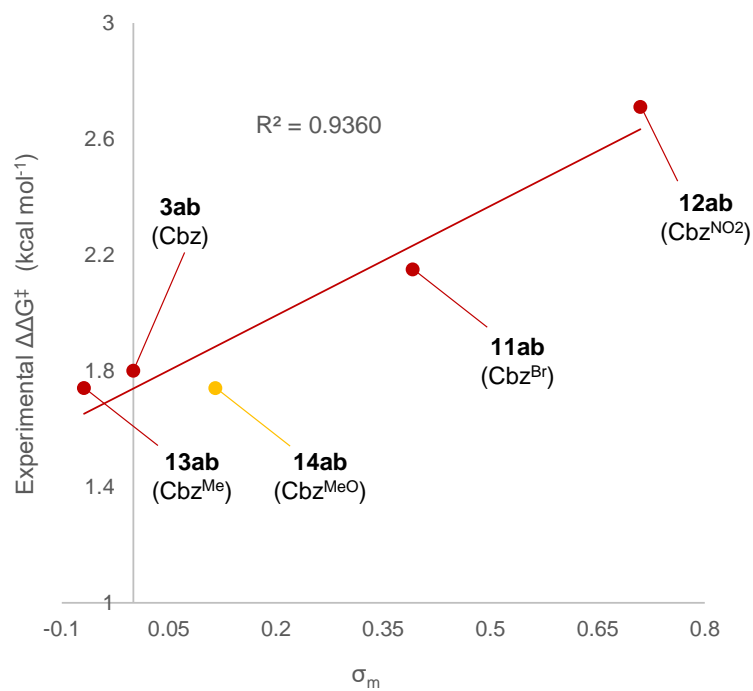

**Figure S5.** Hammett plot of  $\Delta\Delta G^\ddagger$  vs.  $\sigma_m$  constants.

## 6. NMR experiment

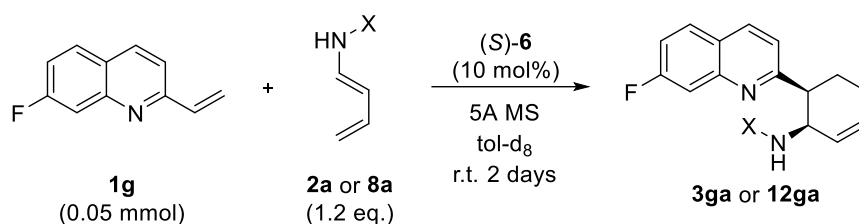

To a dried NMR tube was added **1g** (0.05 mmol), **2a** or **8a** (0.06 mmol), activated MS 5A (10 mg),  $\text{CH}_2\text{Br}_2$  (0.05 mmol as an internal standard),  $\text{C}_6\text{H}_5\text{CF}_3$  (0.05 mmol as an internal standard) and toluene- $\text{d}_8$  (0.6 mL). The atmosphere was replaced with nitrogen and catalyst (*S*)-**6** (0.005 mmol) was added. The reaction mixture was monitored for 48 h by  $^1\text{H}$  NMR and  $^{19}\text{F}$  NMR.

**Table S7 and Figure S6.** Summary of NMR experiments.

| Cbz      | 2a      |  | Cbz <sup>NO2</sup> | 8a       |
|----------|---------|--|--------------------|----------|
| time (h) | 3ga (%) |  | time (h)           | 12ga (%) |
| 0        | 0       |  | 0                  | 0        |
| 0.25     | 1.2     |  | 0.25               | 4.0      |
| 0.5      | 1.7     |  | 0.5                | 6.7      |
| 1        | 3.2     |  | 1                  | 11       |
| 2        | 6.3     |  | 2                  | 17       |
| 3        | 8.1     |  | 3                  | 25       |
| 4        | 11      |  | 4                  | 33       |
| 5        | 14      |  | 5                  | 38       |
| 6        | 17      |  | 6                  | 44       |
| 9        | 24      |  | 9                  | 54       |
| 12       | 32      |  | 12                 | 64       |
| 24       | 50      |  | 24                 | 74       |
| 36       | 64      |  | 36                 | 84       |
| 48       | 70      |  | 48                 | 87       |

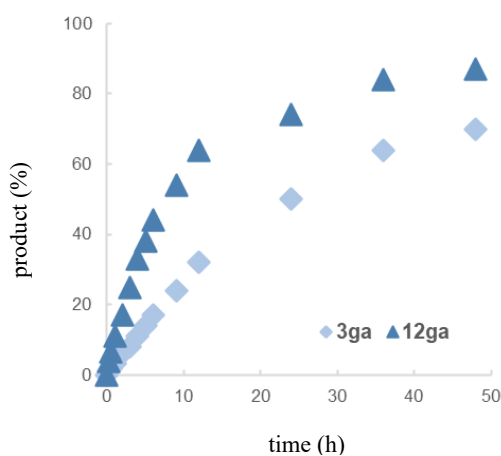

## 7. Determination of relative and absolute configurations

### 7-1. Relative configurations

The NOESY experiment determined the relative configuration of **3ab**. Each substituent (quinoline, amide and methyl group) on a cyclohexene ring was in the same direction.

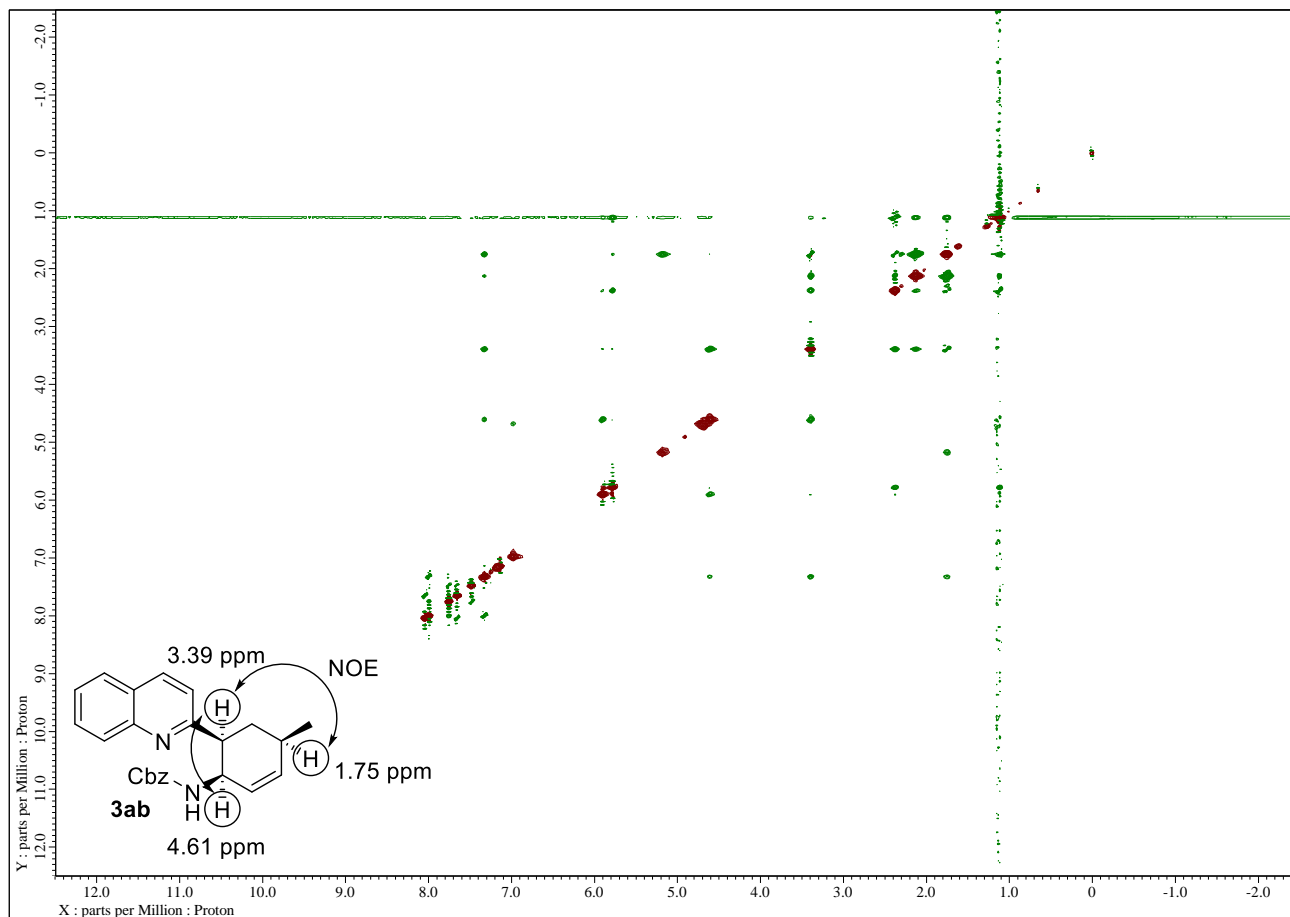

Figure S7. NOESY spectra of **3ab**.

## 7-2. Absolute configurations

The structure of **3aa** was determined by HPLC and  $^1\text{H}$  NMR comparison of the chiral compound **X2** obtained from the derivatization of the known alcohol **X1**<sup>[9]</sup>.

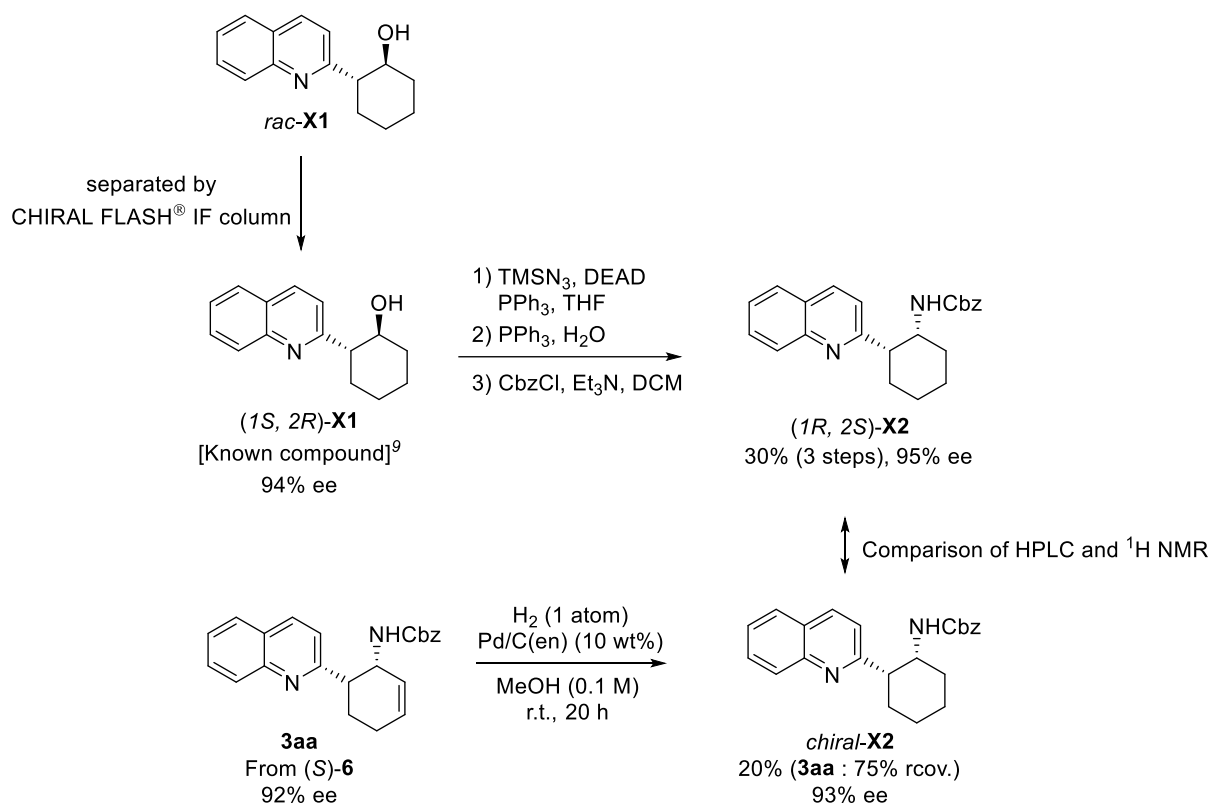

**Scheme S1.** Method for determination of absolute configuration of **3aa**.

### [Synthesis of (*1R*, *2S*)-**X2** from (*1S*, *2R*)-**X1**]

To a flame-dried 5 mL glass tube with a magnetic stirrer bar, (*1S,2R*)-cyclohexyl alcohol **X1**<sup>9</sup> (68 mg, 0.3 mmol, 94% ee),  $\text{PPh}_3$  (120 mg, 0.45 mmol, 1.5 eq.) and dry-THF (2 mL) were added. After cooling to  $-78\text{ }^\circ\text{C}$ , DEAD (2.2 M in toluene, 180  $\mu\text{L}$ , 0.39 mmol, 1.3 eq.) and DPPA (98  $\mu\text{L}$ , 0.45 mmol, 1.5 eq.) were added, and gradually heated to room temperature. After 16 h, the solvent was removed under reduced pressure. The residue was filtered through short column chromatography using hexane/AcOEt (29/1) as the eluent. This crude material including corresponding chiral azide was directly used for the next step without further purification.

To the crude material containing azide compound, THF (3 mL),  $\text{H}_2\text{O}$  (80  $\mu\text{L}$ ) and  $\text{PPh}_3$  (236 mg) were added. After stirring for 5 hours at  $70\text{ }^\circ\text{C}$ ,  $\text{H}_2\text{O}$  (10 mL) was added, and extracted with AcOEt (10 mL \* 3 times). The combined organic layers were dried over  $\text{MgSO}_4$ , and the solvent was removed under reduced pressure. The residue was filtered through short column chromatography using MeOH as the eluent. This crude material including corresponding chiral amine was directly used for the next step without further purification.

To a flame-dried 5 mL glass tube with a magnetic stirrer bar, the crude material containing a corresponding chiral amine (~23 mg),  $\text{NEt}_3$  (38  $\mu\text{L}$  mg, 0.27 mmol) and dry-DCM (1 mL) were added. After cooling to  $0\text{ }^\circ\text{C}$ ,  $\text{CbzCl}$  (26  $\mu\text{L}$ , 0.18 mmol) was added, and heated to room temperature. After 24 h,  $\text{H}_2\text{O}$  (10 mL) was carefully added, and

extracted with DCM (5 mL \* 3 times). The combined organic layers were dried over MgSO<sub>4</sub>, and the solvent was removed under reduced pressure. The residue was purified by column chromatography using hexane/AcOEt (4/1) as eluent, and the target product (*1R, 2S*)-**X2** was obtained in 30% yield (32.4 mg, 0.09 mmol) over 3 steps.

[Synthesis of *chiral-X2* from **3aa**]

To a solution of **3aa** (63 mg, 0.17 mmol) in MeOH (1.7 mL), Pd/C(en) (7.0 mg, 10 wt%) was added under Ar atmosphere. The mixture was replaced three times with hydrogen gas (1 atom) and stirred at room temperature for 20 hours. This suspension was carefully filtered through Celite® (washed with MeOH), and concentrated in *vacuo*. The crude material was purified by using silica gel column chromatography (Hexane/AcOEt = 4/1) to afford *Chiral-X2* (12.3 mg, 0.034 mmol, 20% yield) with 75% recovery of **3aa**.

→ The <sup>1</sup>H NMR charts of (*1R,2S*)-**X2** and *Chiral-X2* synthesized by a different route were in perfect agreement. According to HPLC comparison (**Figure S8**), the absolute configuration of the product **3aa** was determined to be (*1R, 6S*). This result was also consistent with the calculation results.

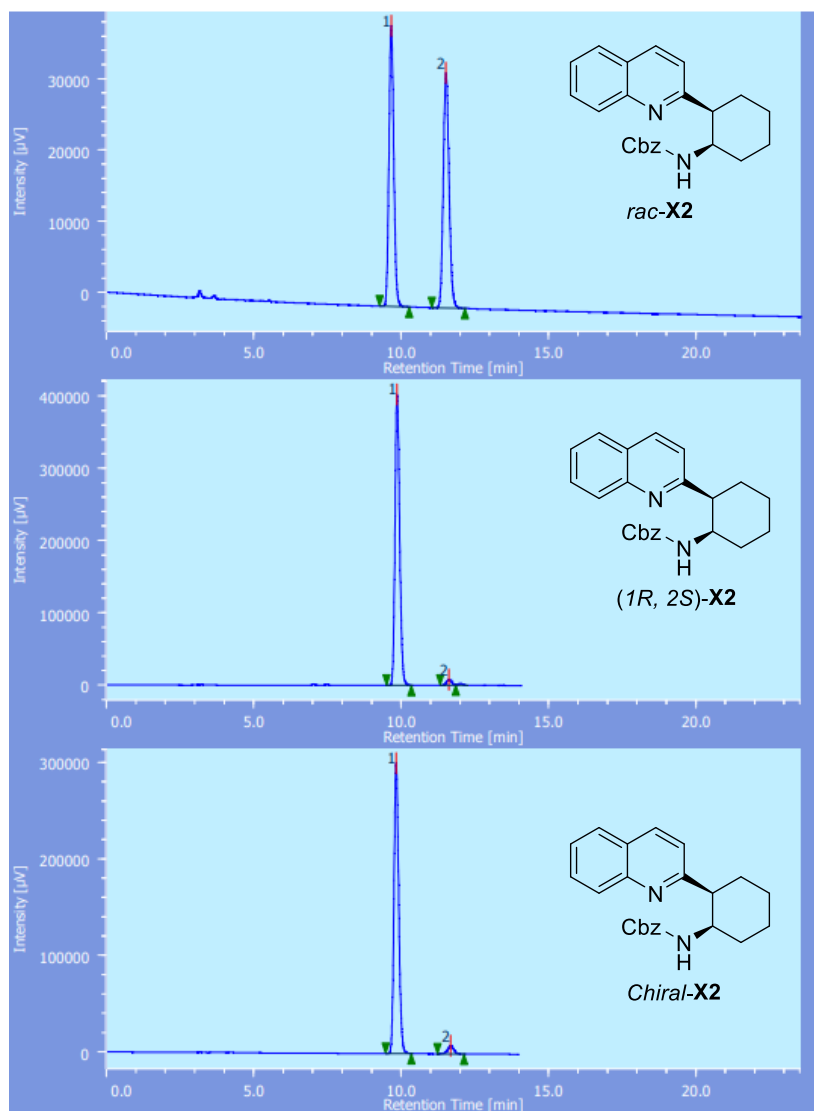

**Figure S8.** Comparison of HPLC chart of **X2**.

**Benzyl ((1*R*,2*S*)-2-(quinolin-2-yl)cyclohexyl)carbamate (X2)**

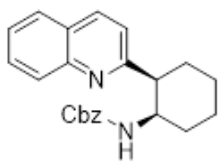

colorless oil;  $[\alpha]_{\text{D}}^{23.0} = +62.9$  ( $c = 0.82$ ,  $\text{CHCl}_3$ , 93% ee);  $R_f = 0.20$  (Hexane/EtOAc= 6/1);  $^1\text{H NMR}$  (600 MHz,  $\text{CDCl}_3$ , VT50)  $\delta$  8.03 (t,  $J = 7.2$  Hz, 2H), 7.75 (d,  $J = 8.4$  Hz, 1H), 7.66 (t,  $J = 8.4$  Hz, 1H), 7.48 (t,  $J = 7.2$  Hz, 1H), 7.28 (d,  $J = 8.4$  Hz, 1H), 7.24-7.20 (m, 3H), 7.18 (brs, 2H), 6.24 (brs, 1H), 4.98-4.90 (m, 2H), 4.18-4.13 (m, 1H), 3.32-3.27 (m, 1H), 2.33 (brs, 1H), 2.19-2.11 (m, 1H), 1.93-1.87 (m, 1H), 1.75-1.55 (m, 4H), 1.48-1.40 (m, 1H);  $^{13}\text{C NMR}$  (150 MHz,  $\text{CDCl}_3$ )  $\delta$  163.2, 156.2, 147.6, 137.2, 136.5, 129.5, 129.4, 128.5, 127.9, 127.6, 127.0, 126.1, 121.5, 66.3, 51.5, 47.1, 30.7, 28.1, 24.1, 22.3, one carbon was not found probably due to overlapping; IR (ATR) 3401, 3348, 3061, 3034, 2932, 2857, 1715, 1600, 1503, 1454, 1310, 1231, 1094, 1051, 830, 759, 697  $\text{cm}^{-1}$ ; HRMS (FD+)  $m/z$ :  $[\text{M}+\text{H}]^+$  Calcd for  $\text{C}_{23}\text{H}_{24}\text{N}_2\text{O}_2$  360.18378, found: 360.18375.; HPLC analysis CHIRALCEL OD-3 (Hexane:*i*PrOH = 96/4, 1.0 mL/min, 40°C, 254 nm) 10.4 min (major), 12.4 min (minor).

## 8. References

- 1 Xiao, J.; Huang, Y.; Song, Z.; Feng, W. Facile catalyst-free synthesis of 2-vinylquinolines *via* a direct deamination reaction occurring during Mannich synthesis. *RSC Adv.* **2015**, *5*, 99095-99098.
- 2 (a) Han, S.; Chakrasali, P.; Park, J.; Oh, H.; Kim, S.; Kim, K.; Pandey, A. K.; Han, S. H.; Han, S. B.; Kim, I. S. Reductive C2-Alkylation of Pyridine and Quinoline *N*-Oxides Using Wittig Reagents. *Angew. Chem. Int. Ed.* **2018**, *57*, 12737-12740. (b) Erös, G.; Nagy, K.; Mehdi, H.; Pàpai, I.; Nagy, P.; Király, P.; Tárkányi, G.; Soós, T. Catalytic Hydrogenation with Frustrated Lewis Pairs: Selectivity Achieved by Size-Exclusion Design of Lewis Acids. *Chem. Eur. J.* **2012**, *18*, 574-585.
- 3 (a) Momiyama, N.; Tabuse, S.; Noda, H.; Yamanaka, M.; Fujinami, T.; Yamanishi, K.; Izumiseki, A.; Funayama, K.; Egawa, F.; Okada, S.; Adachi, H.; Terada, M. Molecular Design of a Chiral Brønsted Acid with Two Different Acidic Sites: Regio-, Diastereo-, and Enantioselective Hetero-Diels–Alder Reaction of Azopyridinecarboxylate with Amidodienes Catalyzed by Chiral Carboxylic Acid–Monophosphoric Acid. *J. Am. Chem. Soc.* **2016**, *138*, 11353-11359. (b) Pous, J.; Courant, T.; Bernadat, G.; Iorga, B. I.; Blanchard, F.; Masson, G. Regio-, Diastereo-, and Enantioselective Nitroso-Diels–Alder Reaction of 1,3-Diene-1-carbamates Catalyzed by Chiral Phosphoric Acids. *J. Am. Chem. Soc.* **2015**, *137*, 11950-11953.
- 4 Gaussian 16, Revision C.01, Frisch, M. J.; Trucks, G. W.; Schlegel, H. B.; Scuseria, G. E.; Robb, M. A.; Cheeseman, J. R.; Scalmani, G.; Barone, V.; Petersson, G. A.; Nakatsuji, H.; Li, X.; Caricato, M.; Marenich, A. V.; Bloino, J.; Janesko, B. G.; Gomperts, R.; Mennucci, B.; Hratchian, H. P.; Ortiz, J. V.; Izmaylov, A. F.; Sonnenberg, J. L.; Williams-Young, D.; Ding, F.; Lipparini, F.; Egidi, F.; Goings, J.; Peng, B.; Petrone, A.; Henderson, T.; Ranasinghe, D.; Zakrzewski, V. G.; Gao, J.; Rega, N.; Zheng, G.; Liang, W.; Hada, M.; Ehara, M.; Toyota, K.; Fukuda, R.; Hasegawa, J.; Ishida, M.; Nakajima, T.; Honda, Y.; Kitao, O.; Nakai, H.; Vreven, T.; Throssell, K.; Montgomery, J. A., Jr.; Peralta, J. E.; Ogliaro, F.; Bearpark, M. J.; Heyd, J. J.; Brothers, E. N.; Kudin, K. N.; Staroverov, V. N.; Keith, T. A.; Kobayashi, R.; Normand, J.; Raghavachari, K.; Rendell, A. P.; Burant, J. C.; Iyengar, S. S.; Tomasi, J.; Cossi, M.; Millam, J. M.; Klene, M.; Adamo, C.; Cammi, R.; Ochterski, J. W.; Martin, R. L.; Morokuma, K.; Farkas, O.; Foresman, J. B.; Fox, D. J. Gaussian, Inc., Wallingford CT, 2016.
- 5 For M06-2X, see: Zhao, Y.; Truhlar, D. G. The M06 suite of density functionals for main group thermochemistry, thermochemical kinetics, noncovalent interactions, excited states, and transition elements: two new functionals and systematic testing of four M06-class functionals and 12 other functionals. *Theor. Chem. Acc.* **2008**, *120*, 215–241.
- 6 NBO 7.0. Glendenning, E. D.; Badenhoop, J. K.; Reed, A. E.; Carpenter, J. E.; Bohmann, J. A.; Morales, C. M.; Landis, C. R.; Weinhold, F.; Theoretical Chemistry Institute, University of Wisconsin, Madison, WI, (2020); <http://nbo6.chem.wisc.edu>.
- 7 CYLview, 1.0b; Legault, C. Y., Université de Sherbrooke, 2009 (<http://www.cylview.org>)
- 8 (a) Johnson, E. R.; Keinan, S.; Mori-Sanchez, P.; Contreras-García, J.; Cohen, A. J.; Yang, W. Revealing Noncovalent Interactions. *J. Am. Chem. Soc.* **2010**, *132*, 6498-6506. (b) Contreras-García, J.; Johnson, E. R.; Keinan, S.; Chaudret, R.; Piquemal, J.-P.; Beratan, D. N.; Yang, W. NCIPLLOT: A Program for Plotting Noncovalent Interaction Regions. *J. Chem. Theory Comput.* **2011**, *7*, 625-632.
- 9 (a) Shen, Y.-H.; Lv, H.-C.; Zhao, L. Synthesis of Chiral P,N-ligands derived from Quinoline and their Application

in Asymmetric Allylic Alkylations *J. Chem. Res.* **2011**, *35*, 349-351. (b) Liu, Q. Improved Synthesis of Cyclohexane-Backbone Iridium-Complexes of Quinoline-Phosphine and Their Applications in Asymmetric Hydrogenation. *HETEROCYCLES*, **2020**, *100*, 1441-1449.



## 9. NMR spectra

$^1\text{H}$  and  $^{13}\text{C}$  NMR charts of **1b**.

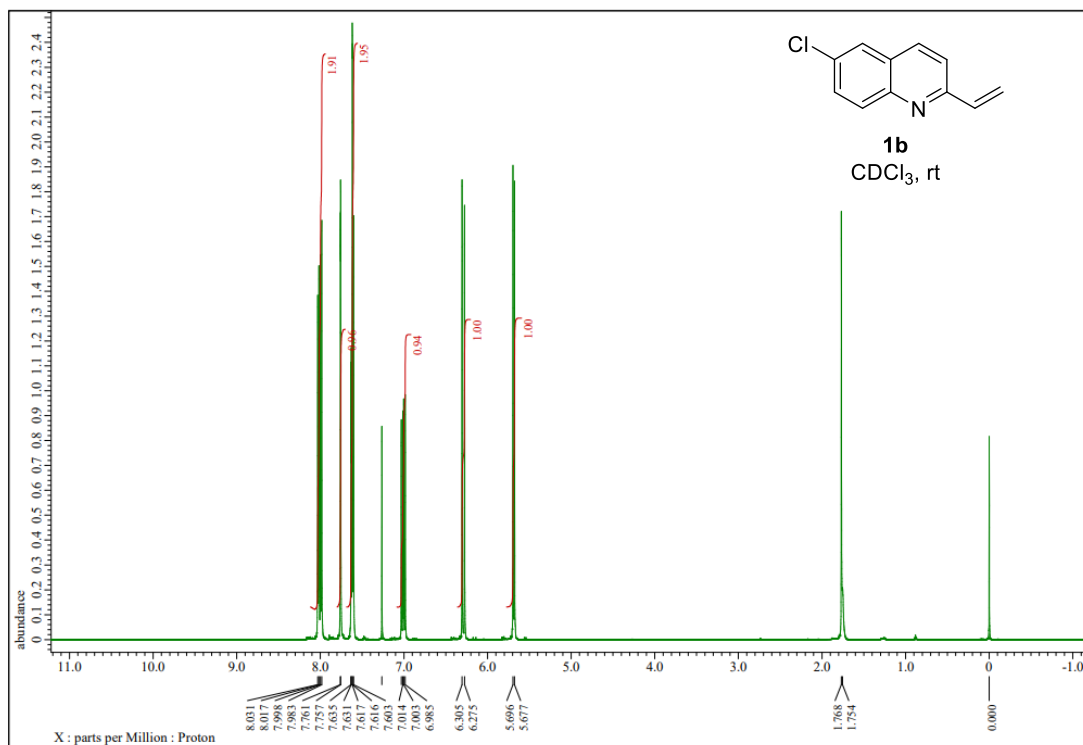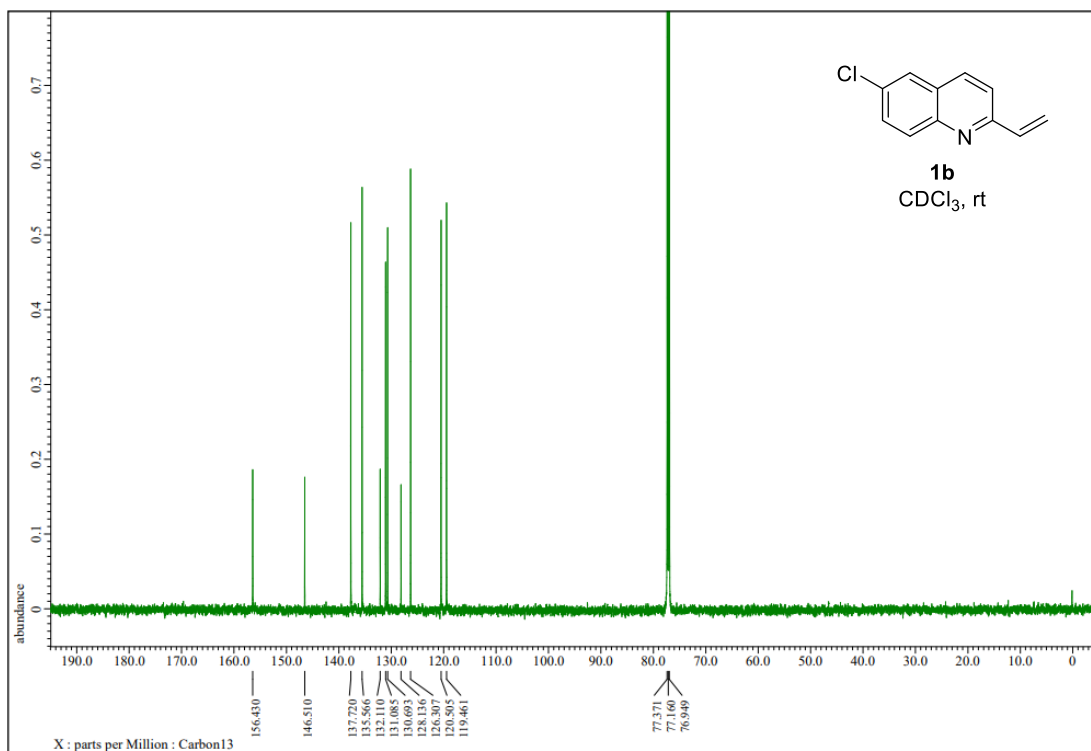

$^1\text{H}$  and  $^{13}\text{C}$  NMR charts of **1h**.

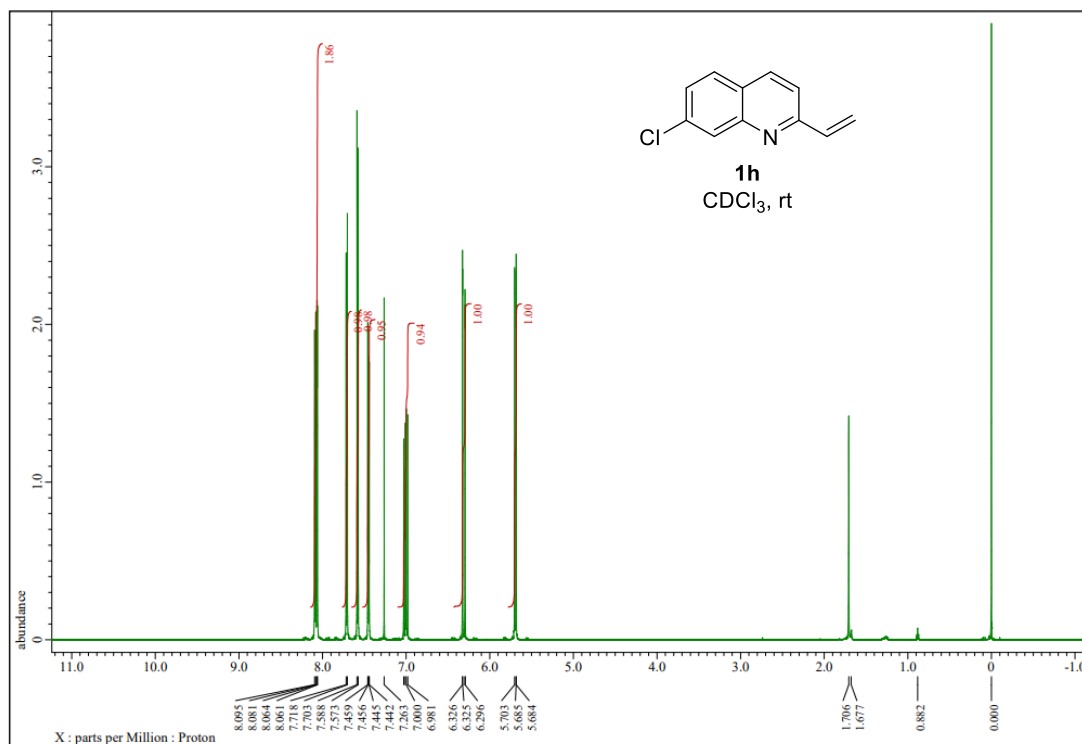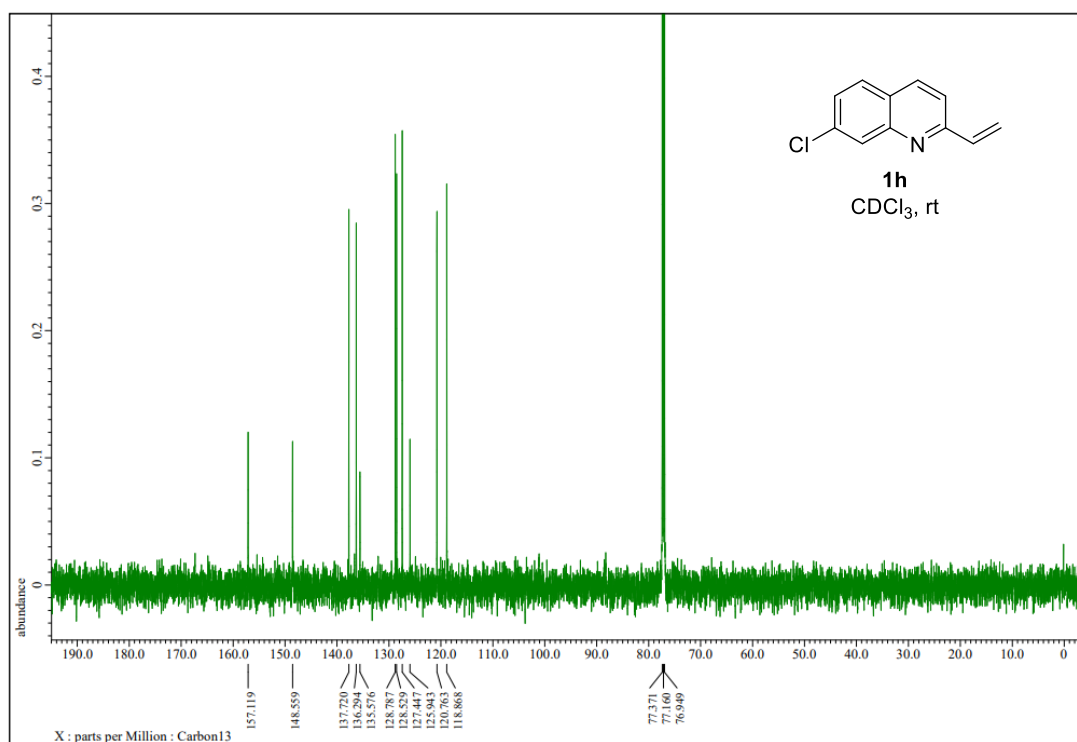

$^1\text{H}$  and  $^{13}\text{C}$  NMR charts of **1d**.

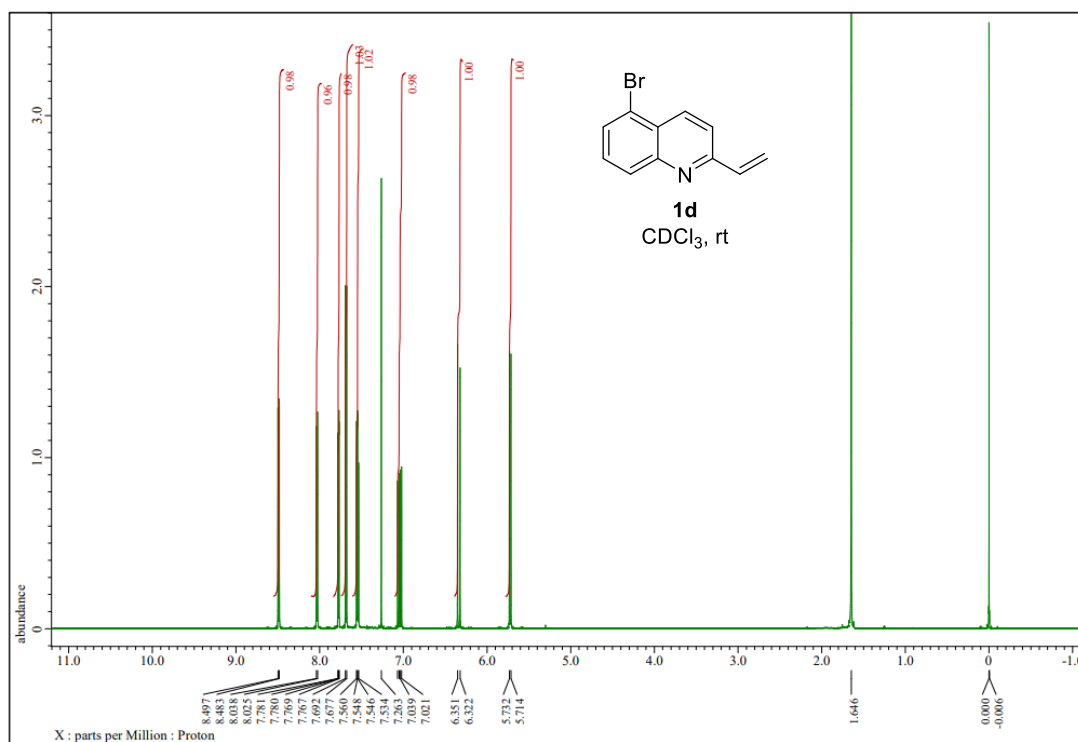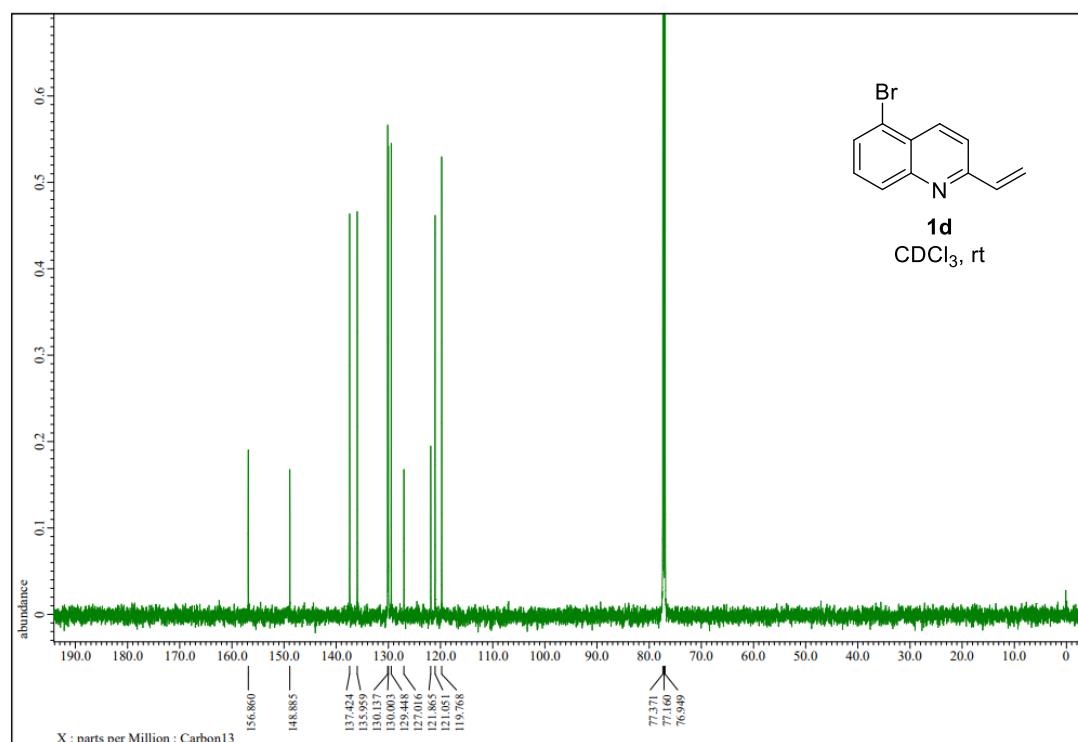

$^1\text{H}$  and  $^{13}\text{C}$  NMR charts of **1e**.

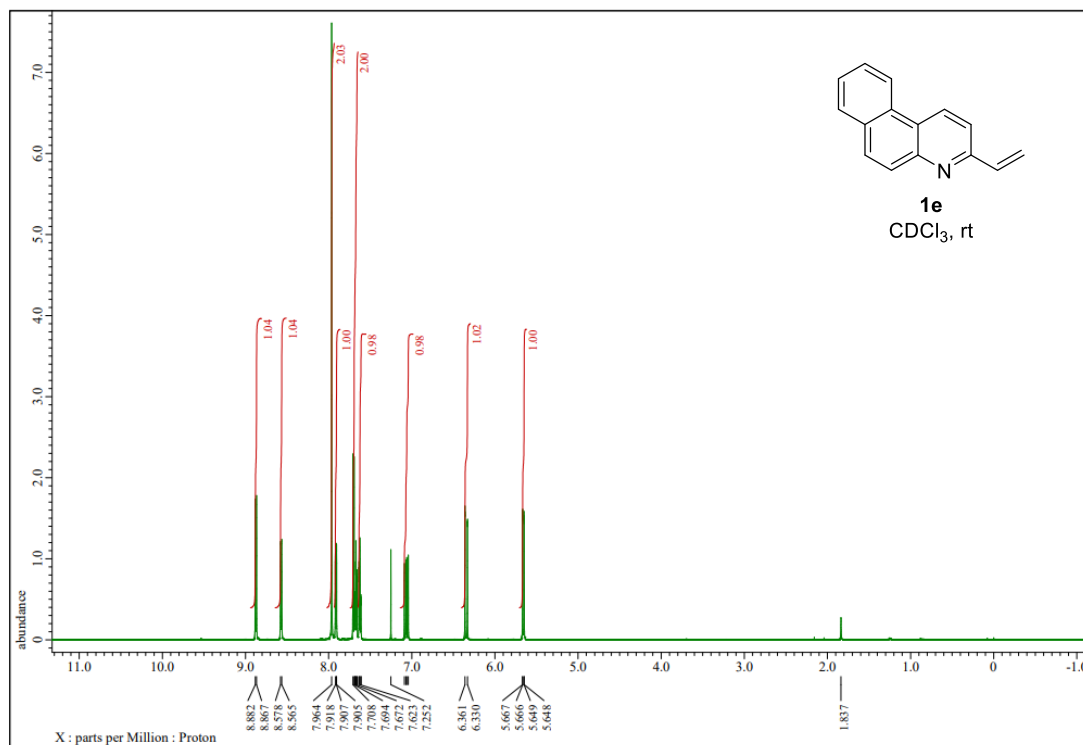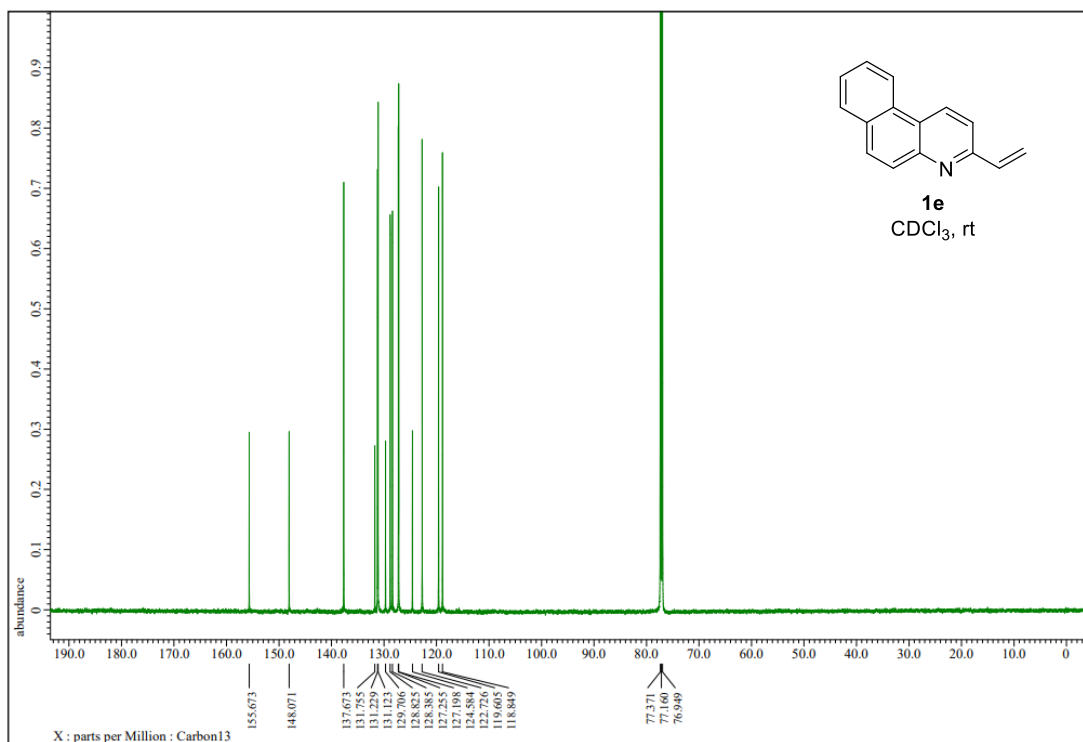

$^1\text{H}$  and  $^{13}\text{C}$  NMR charts of **S1f**.

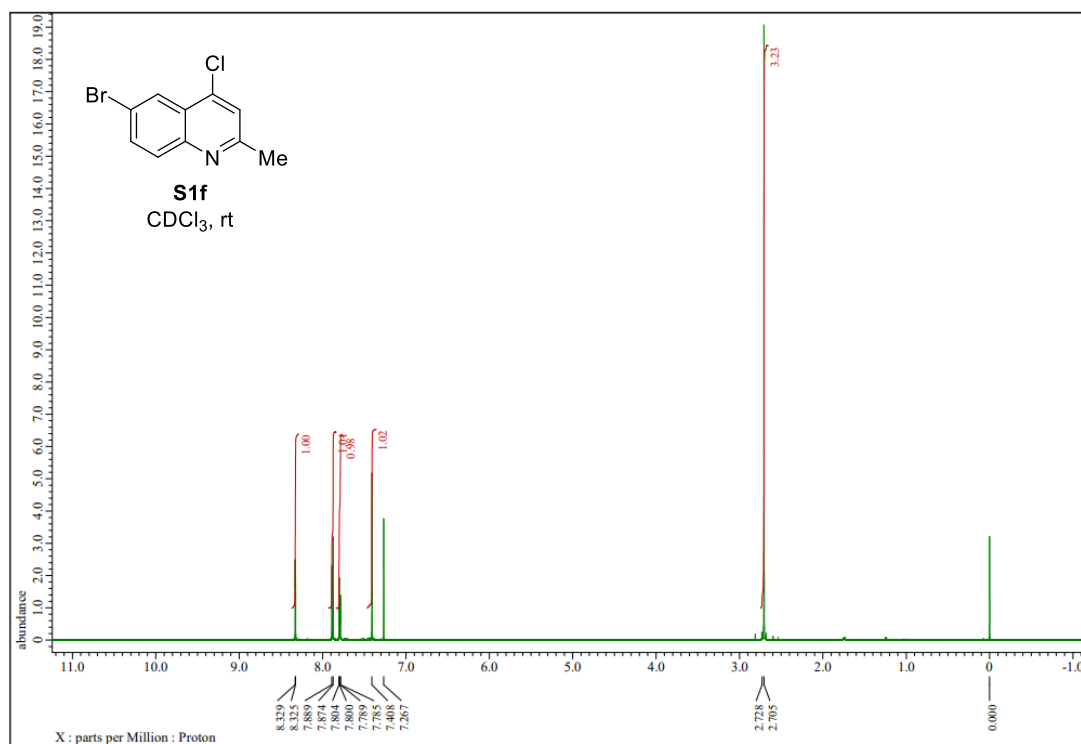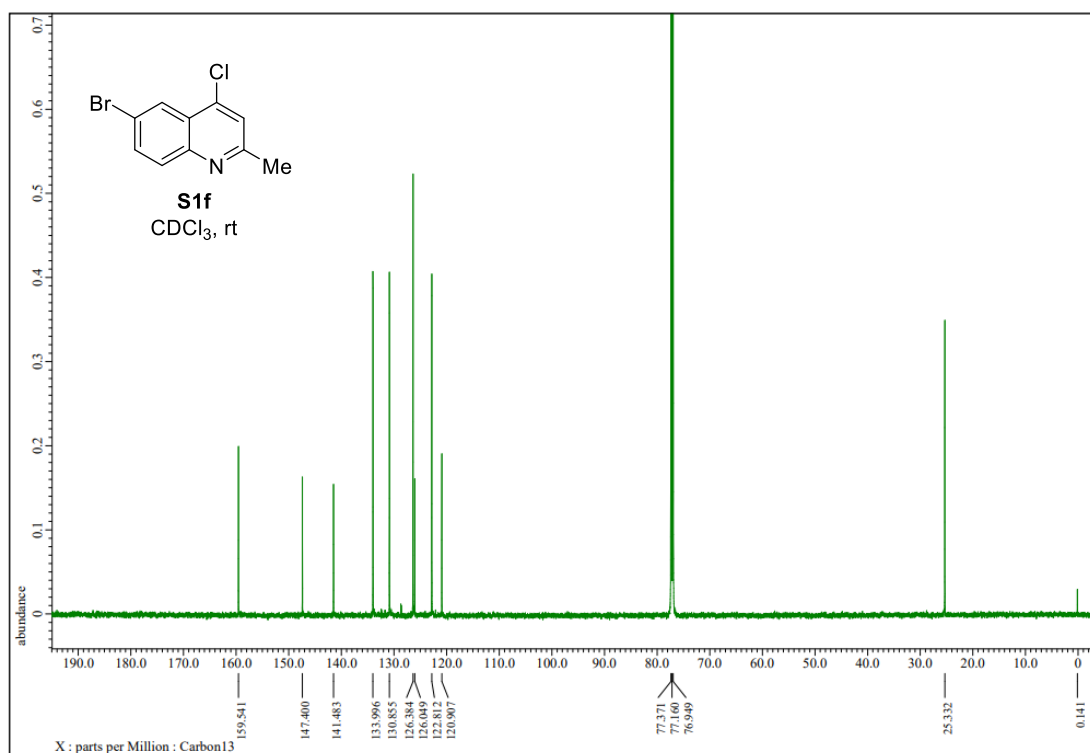

$^1\text{H}$  and  $^{13}\text{C}$  NMR charts of **1f**.

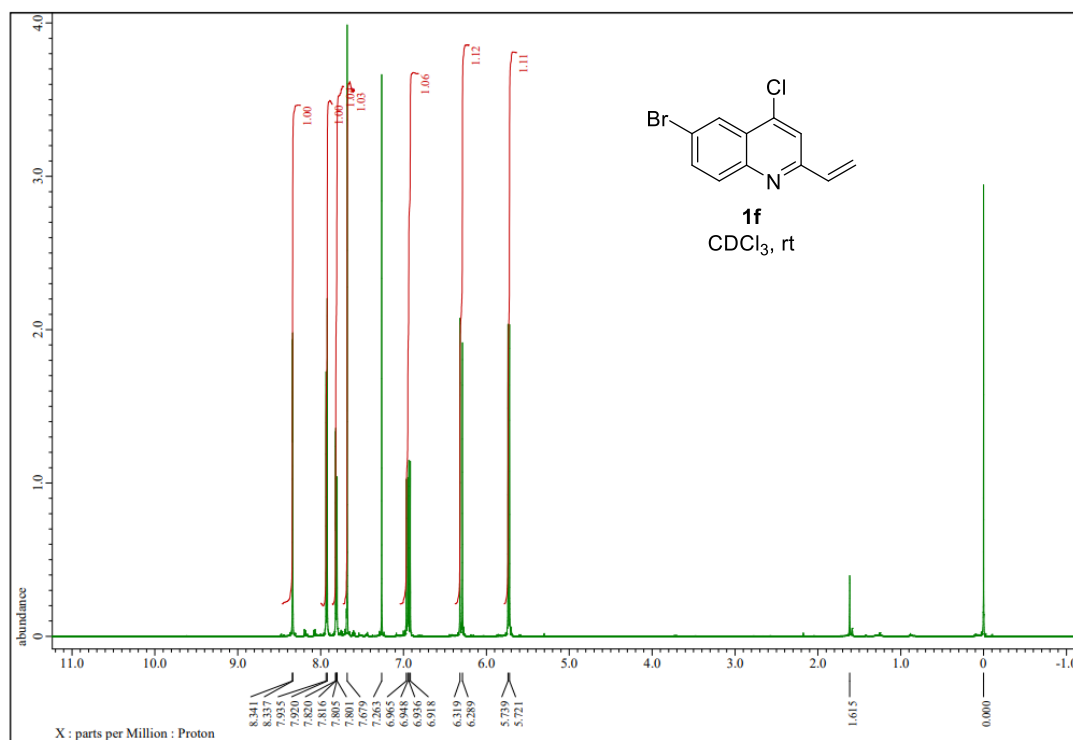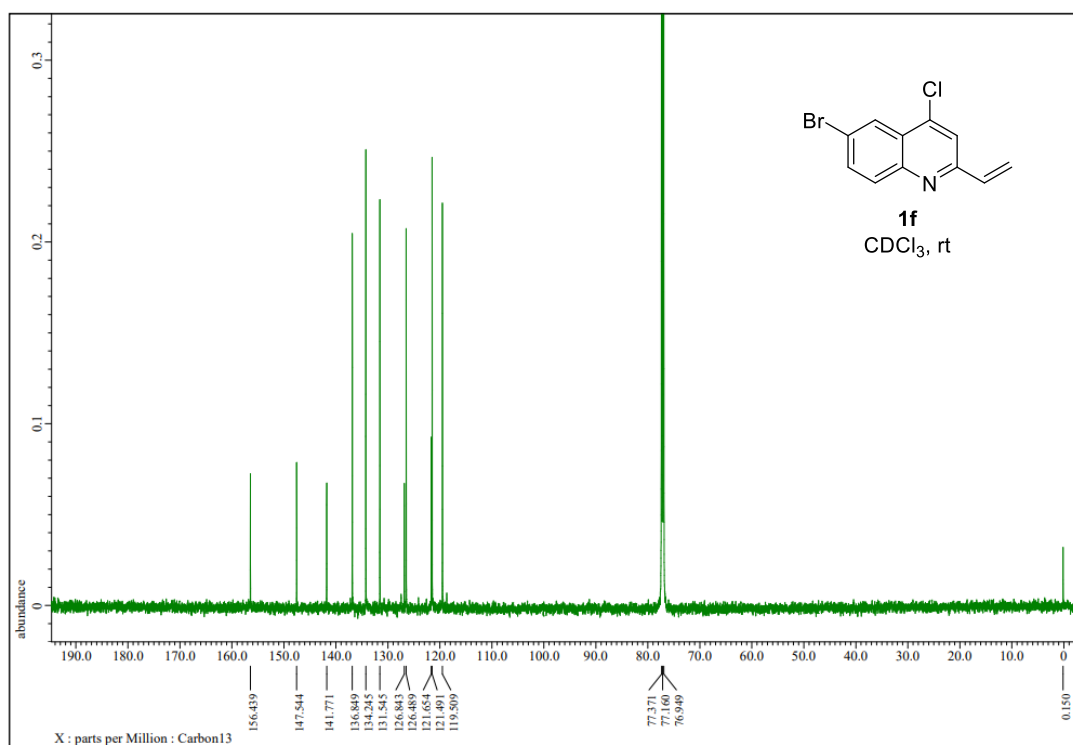

$^1\text{H}$  and  $^{13}\text{C}$  NMR charts of **7b**.

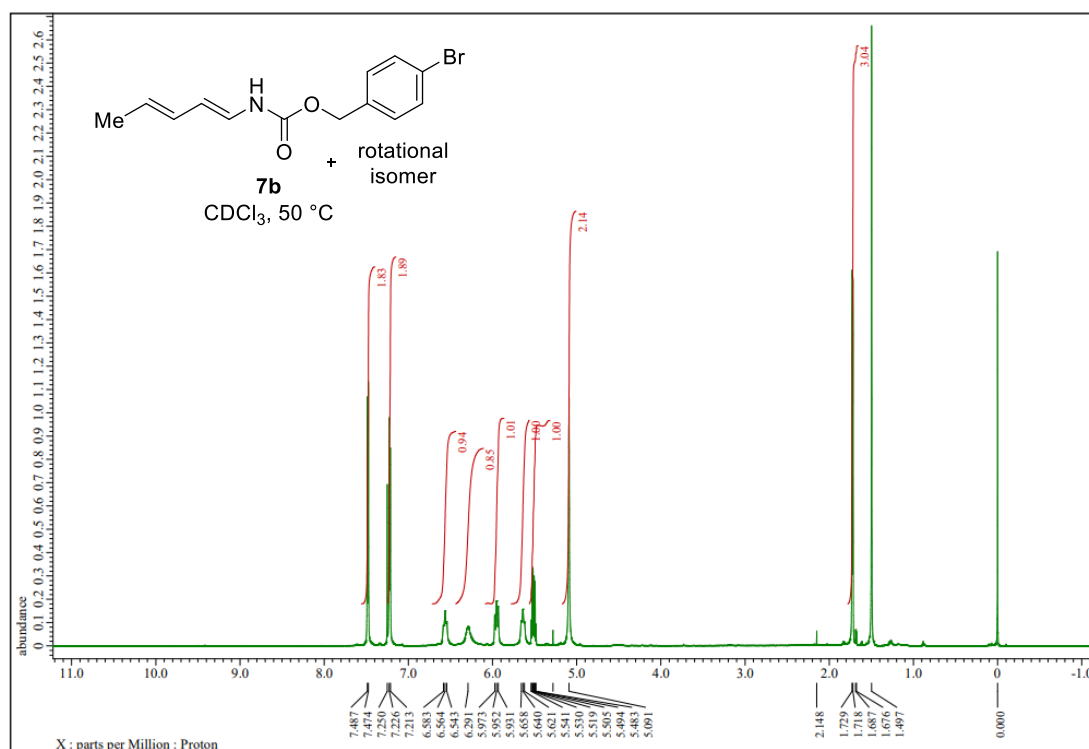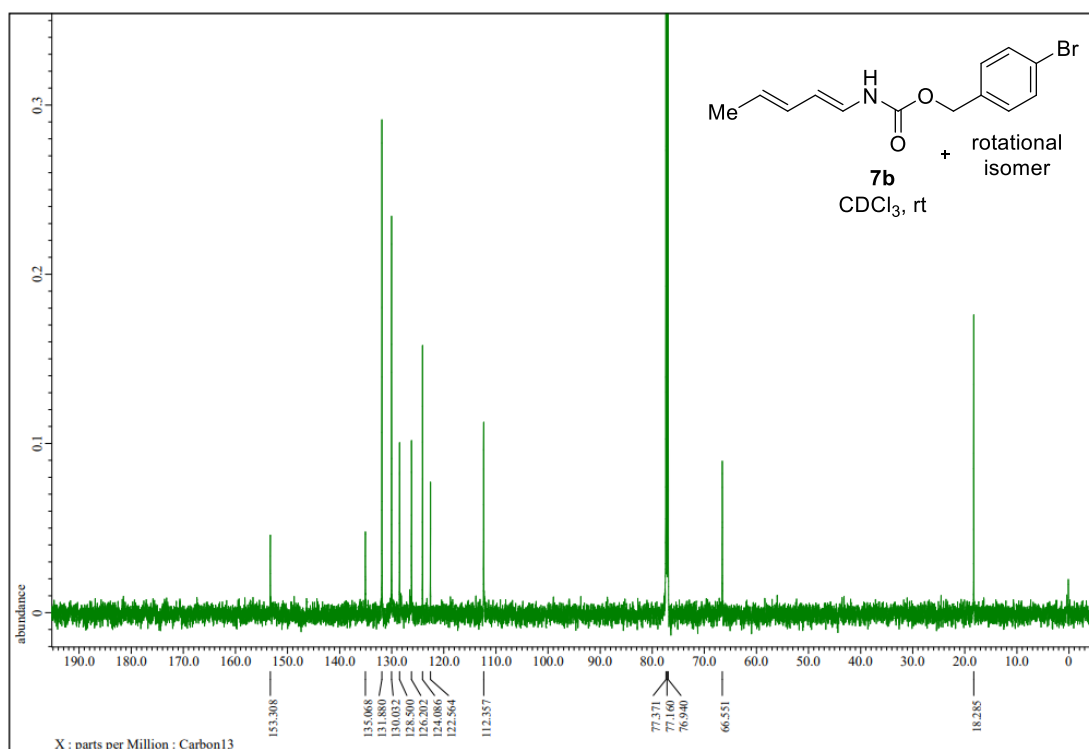

$^1\text{H}$  and  $^{13}\text{C}$  NMR charts of **8b**.

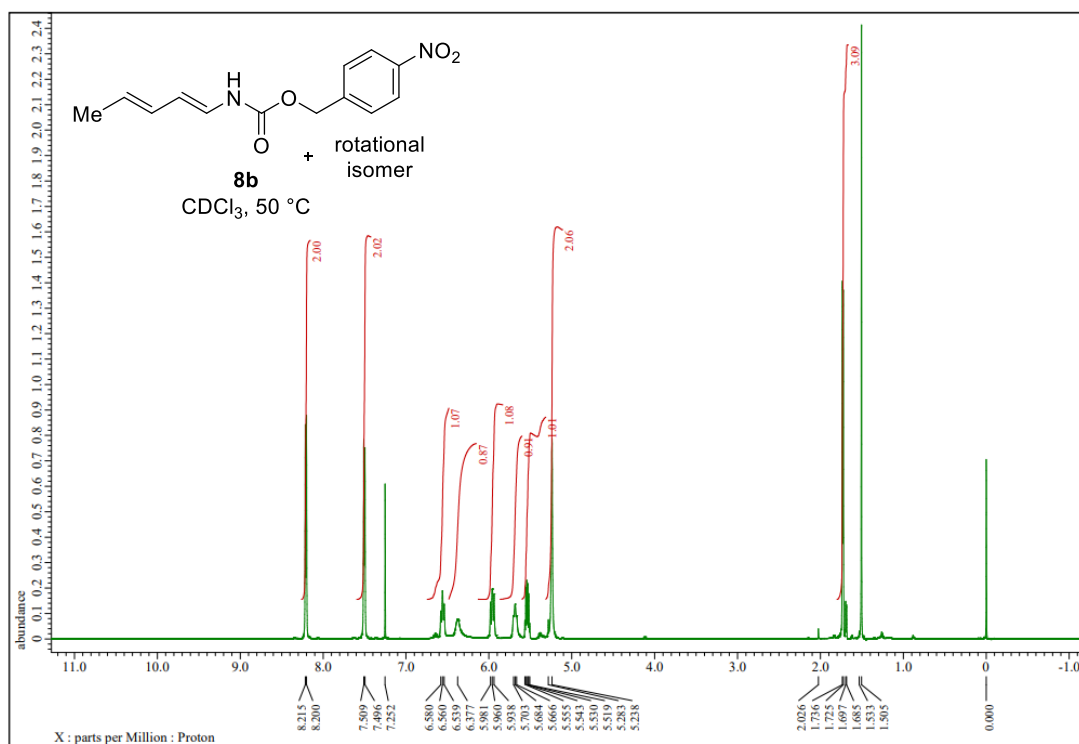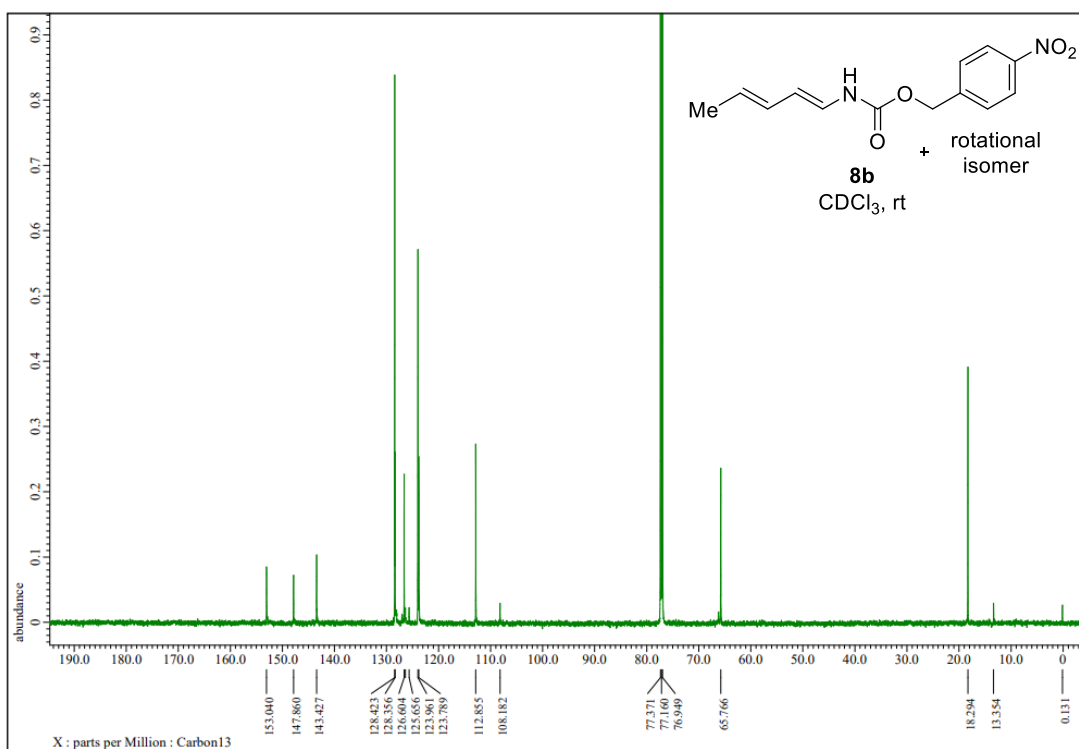



$^1\text{H}$  and  $^{13}\text{C}$  NMR charts of **9b**.

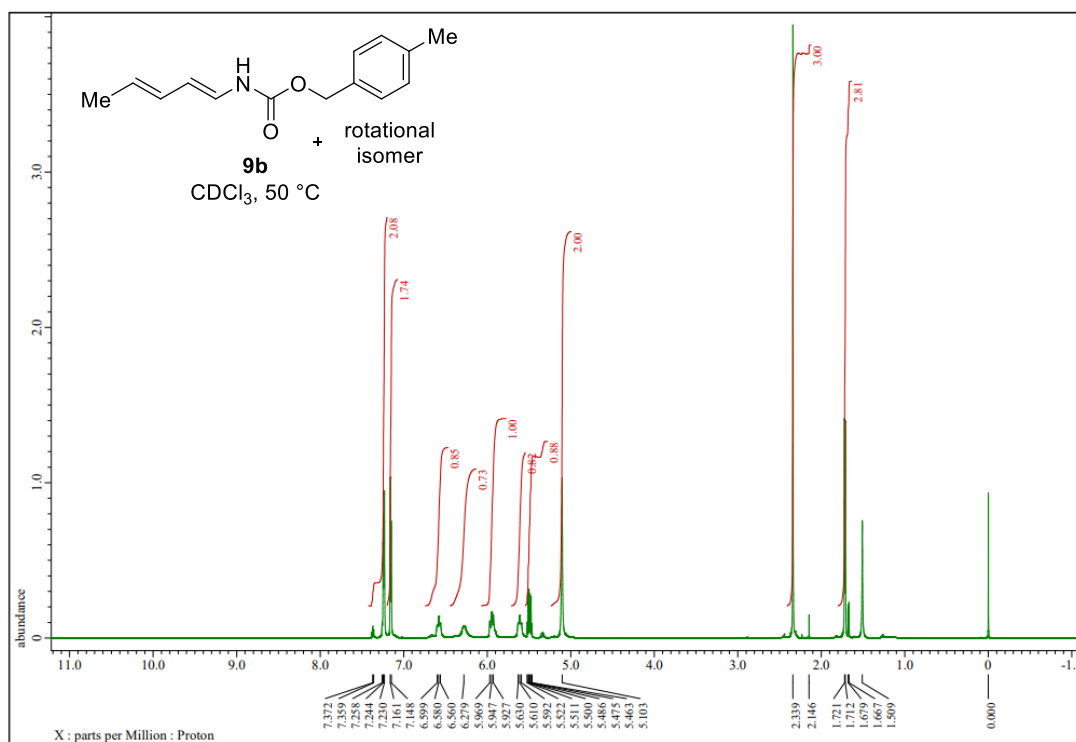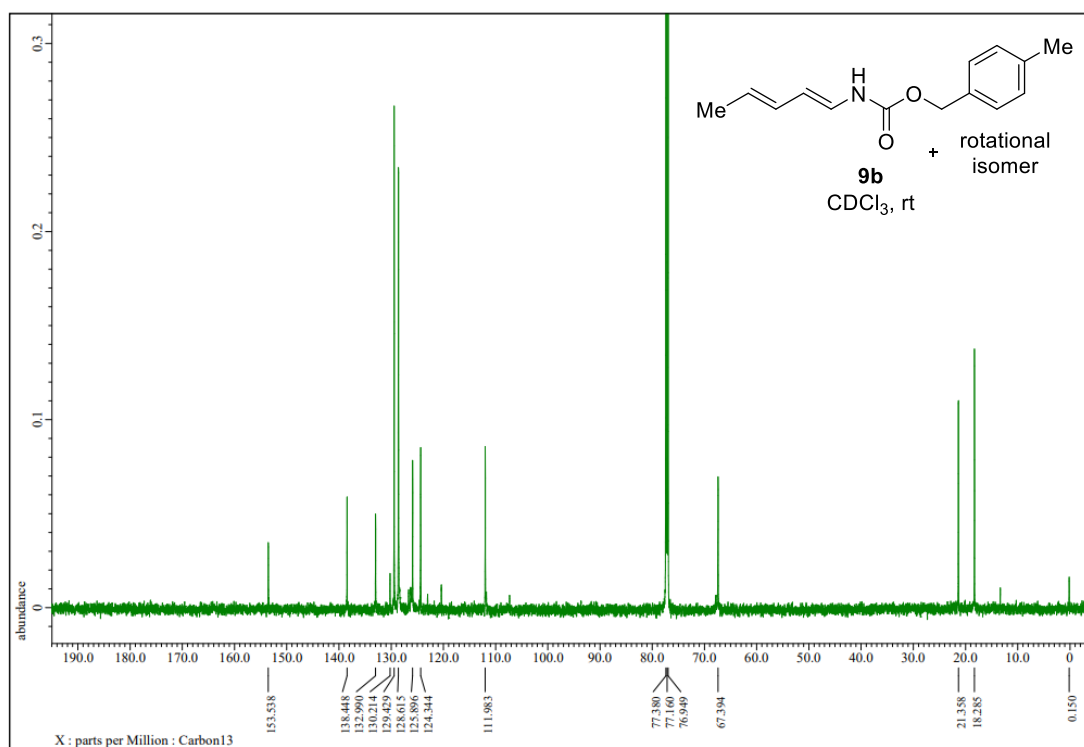

$^1\text{H}$  and  $^{13}\text{C}$  NMR charts of **10b**.

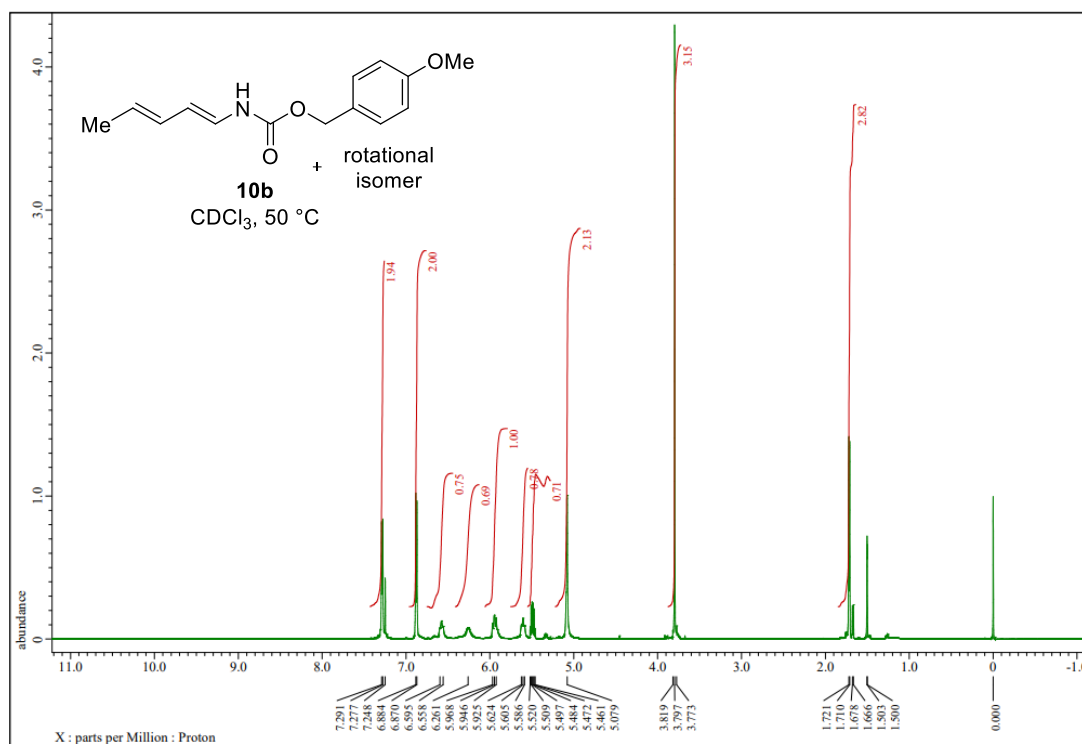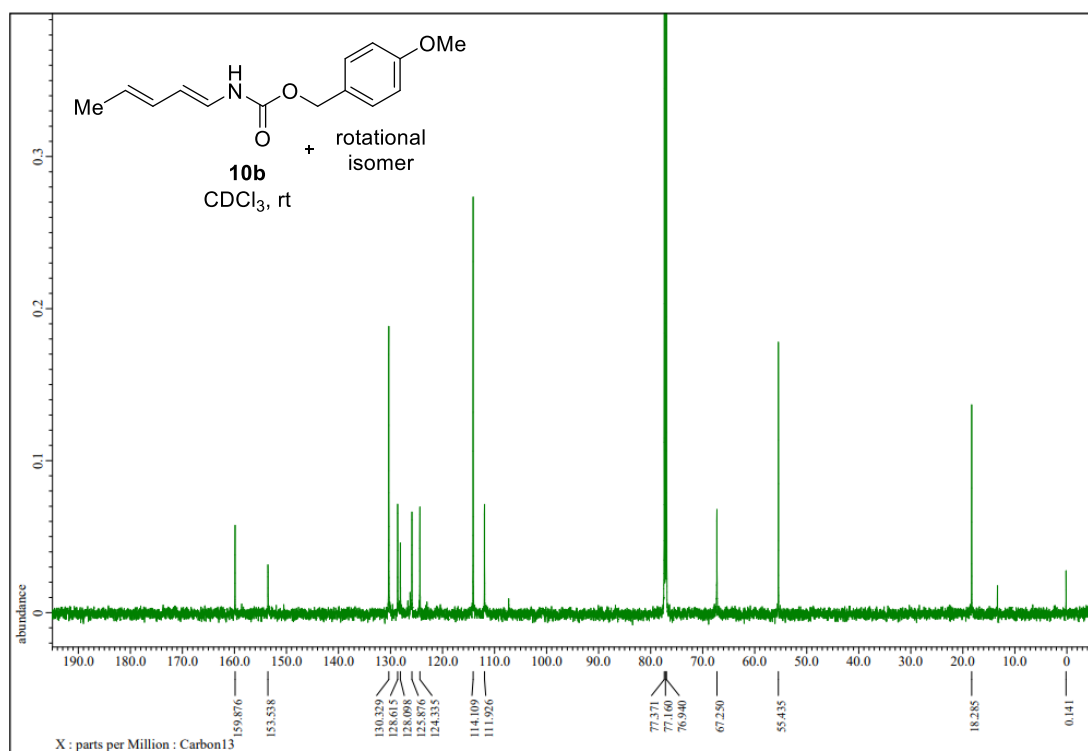

$^1\text{H}$  and  $^{13}\text{C}$  NMR charts of **8a**.

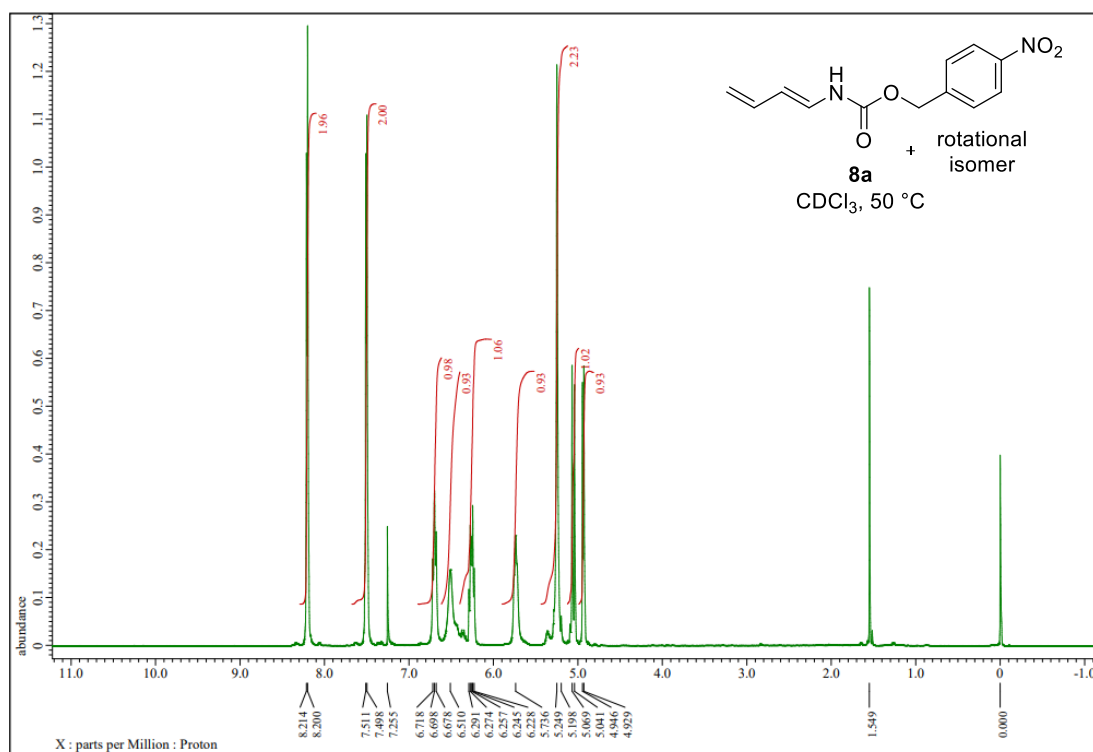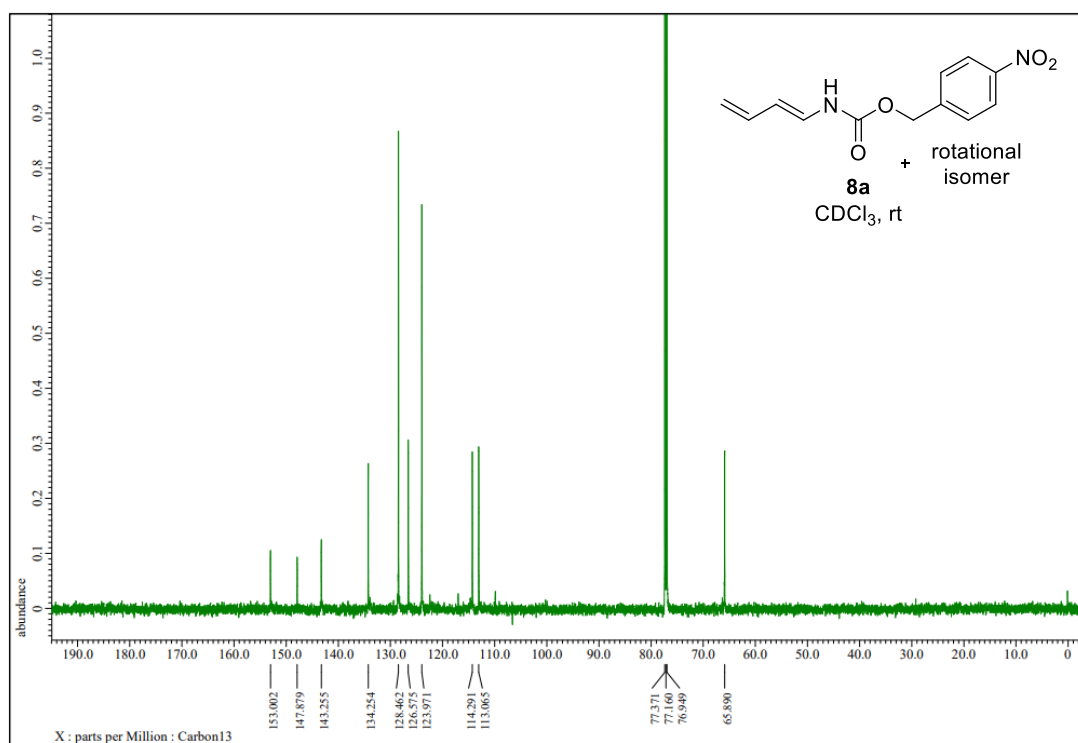

$^1\text{H}$  and  $^{13}\text{C}$  NMR charts of **8c**.

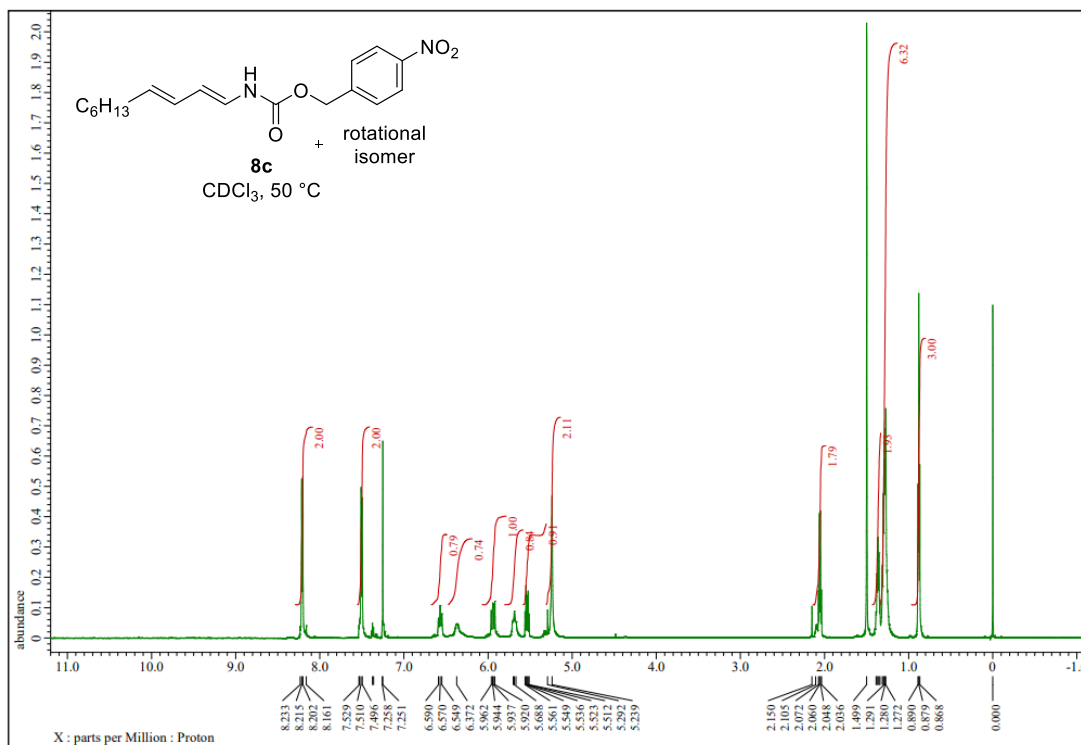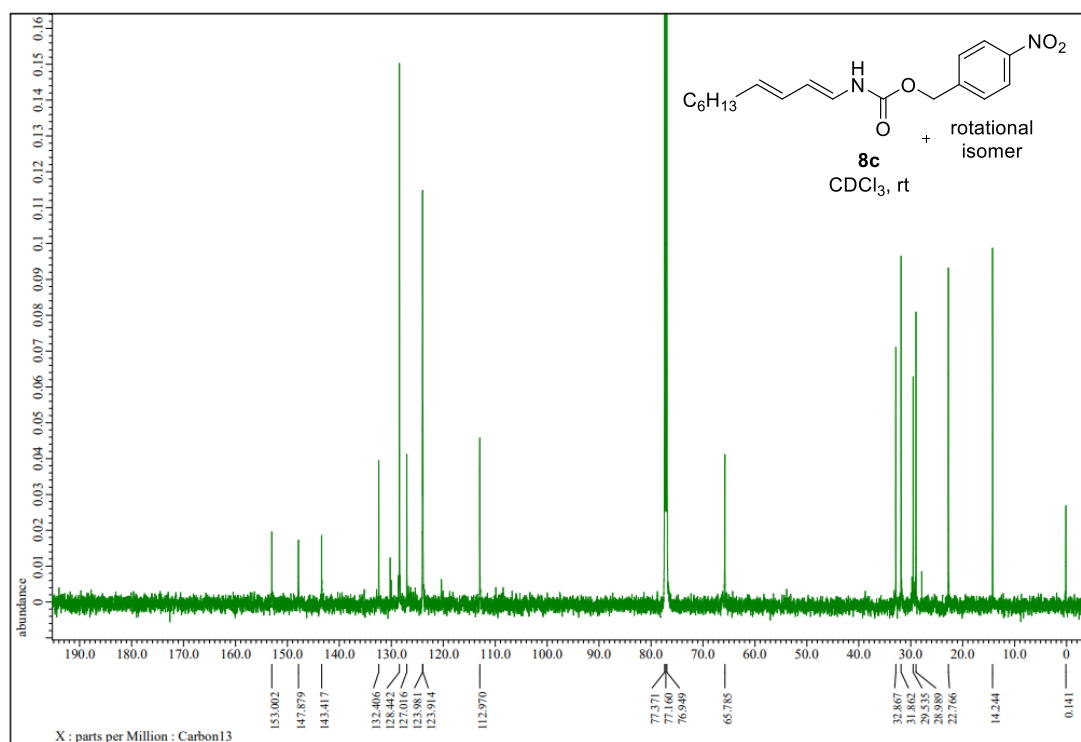

$^1\text{H}$  and  $^{13}\text{C}$  NMR charts of **8d**.

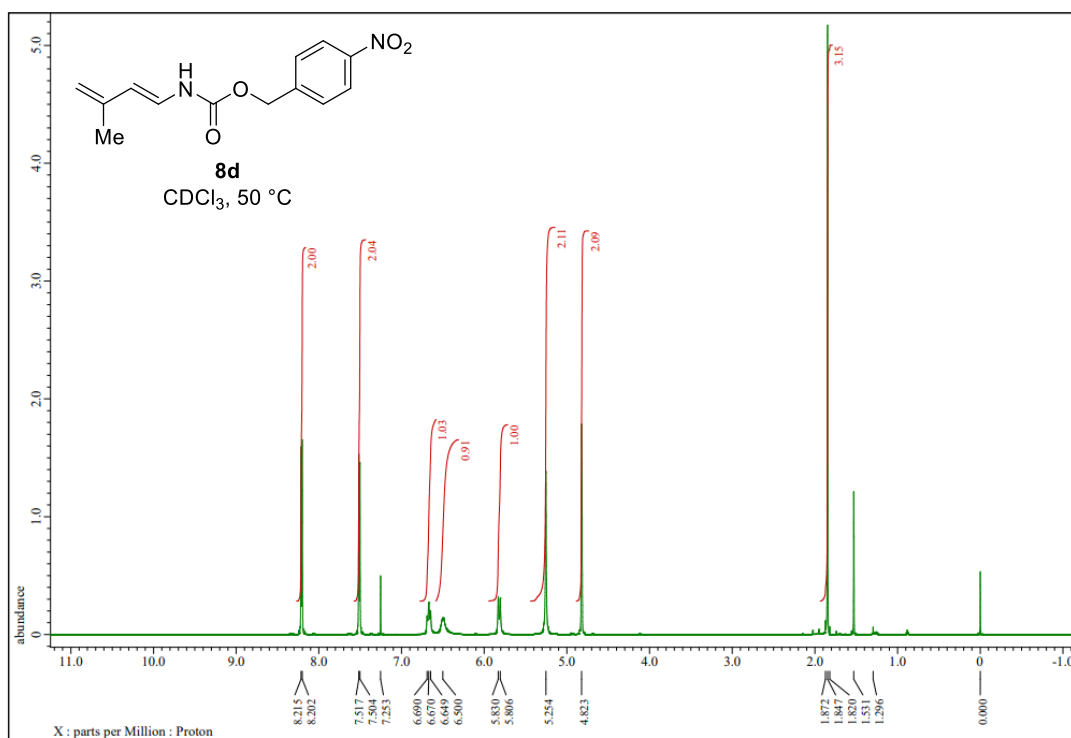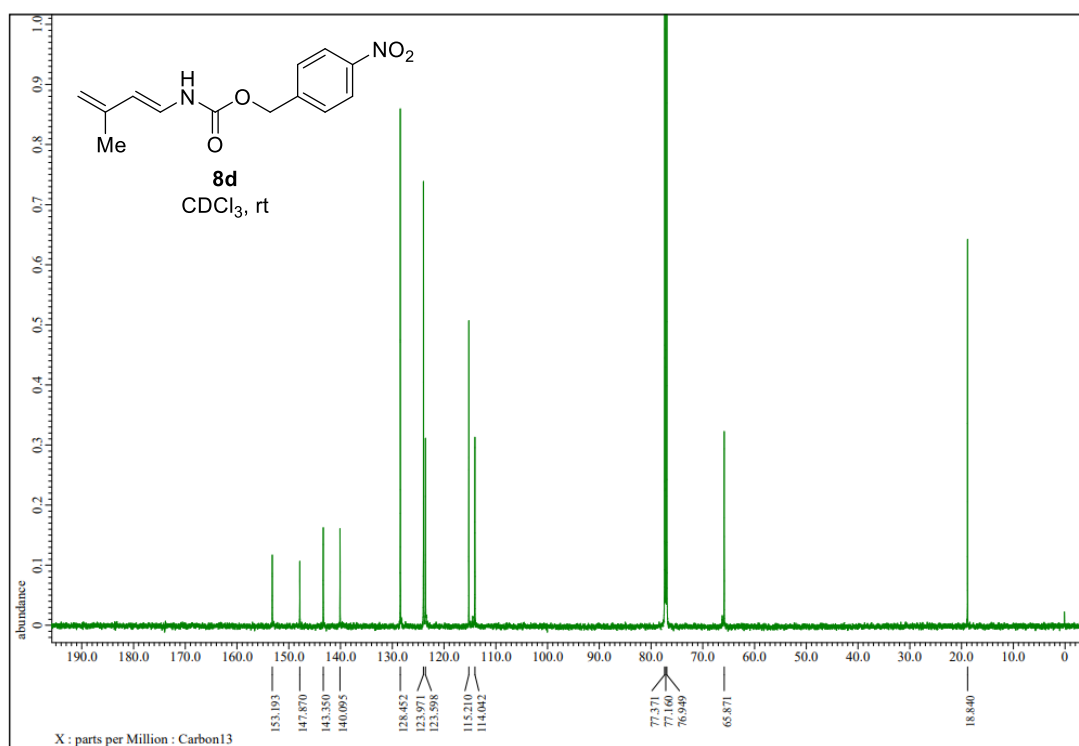

$^1\text{H}$  and  $^{13}\text{C}$  NMR charts of **3aa**.

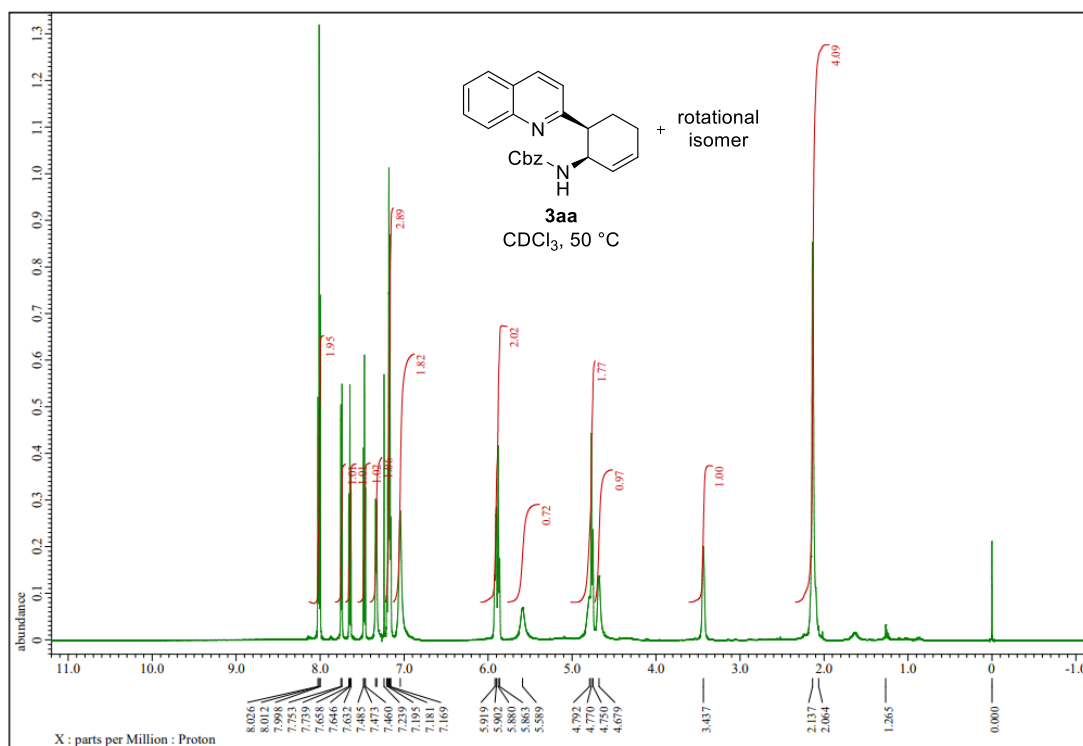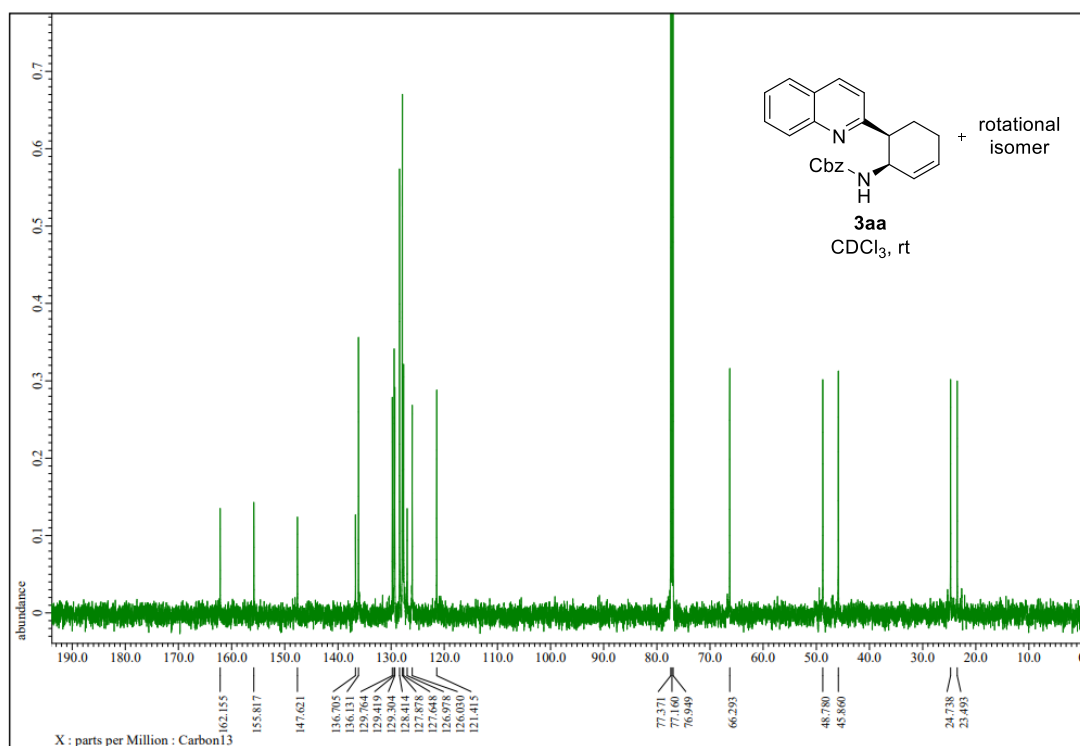

$^1\text{H}$  and  $^{13}\text{C}$  NMR charts of **3ab**.

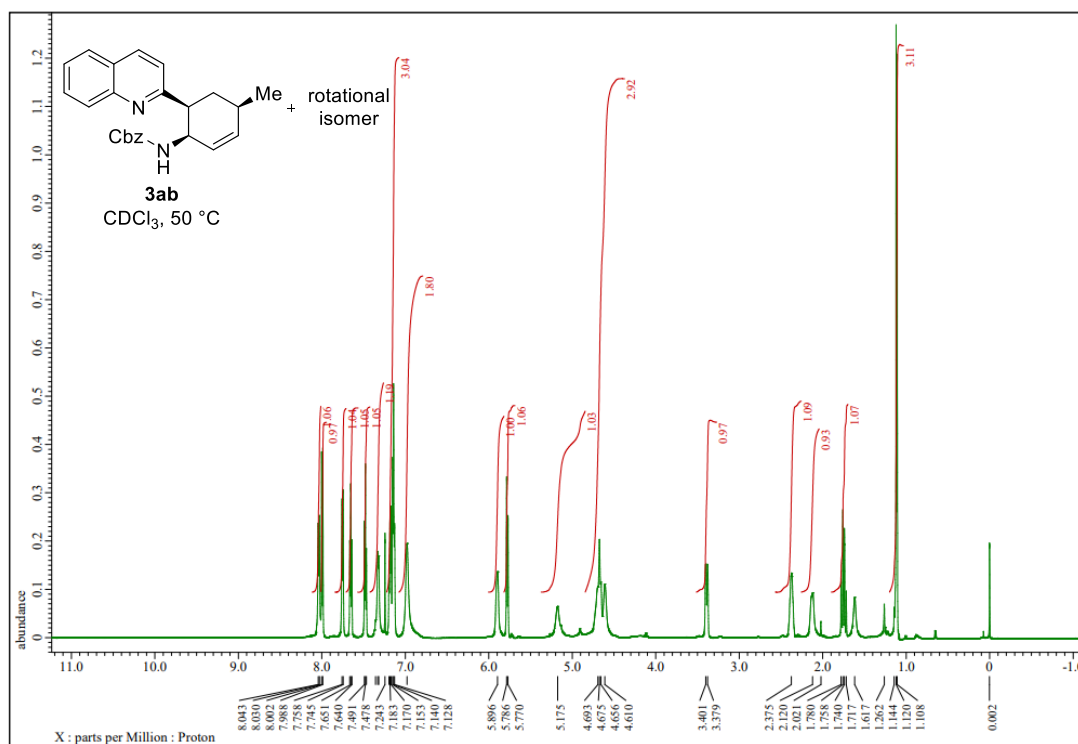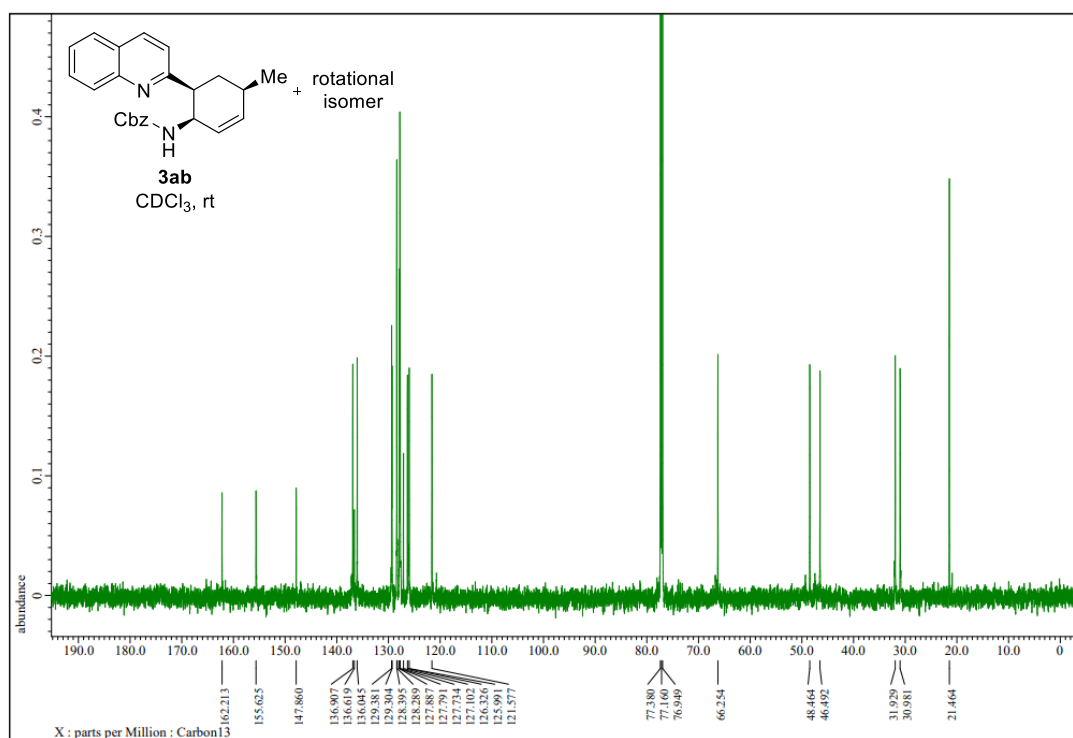

$^1\text{H}$  and  $^{13}\text{C}$  NMR charts of **11ab**.

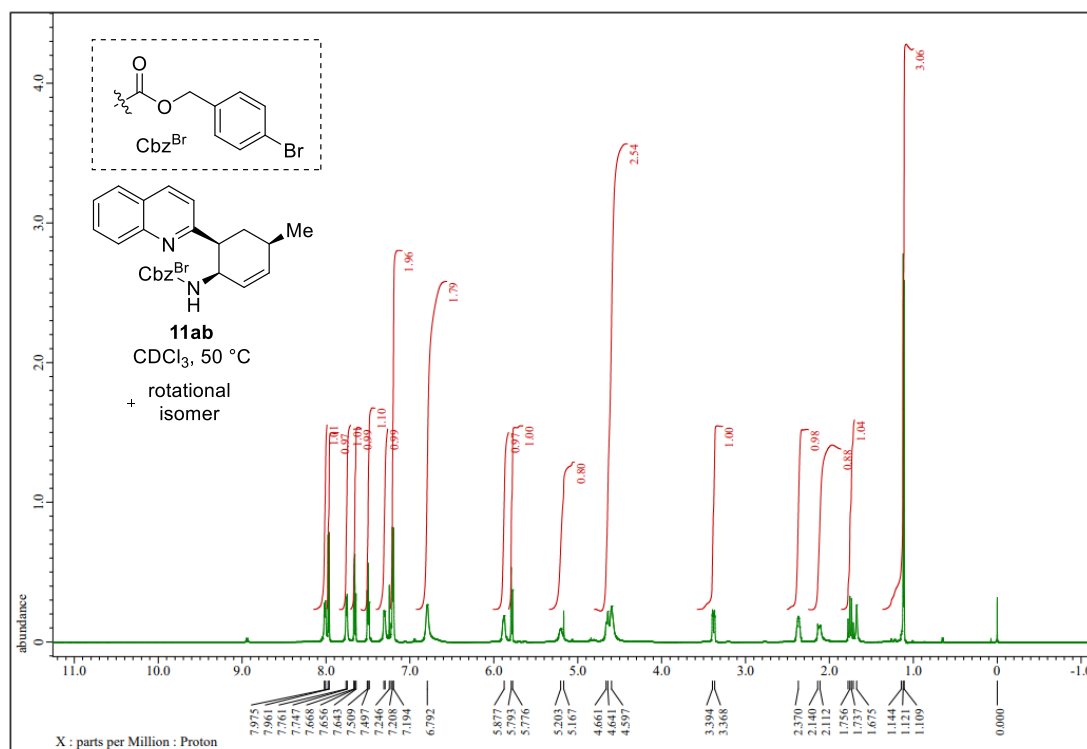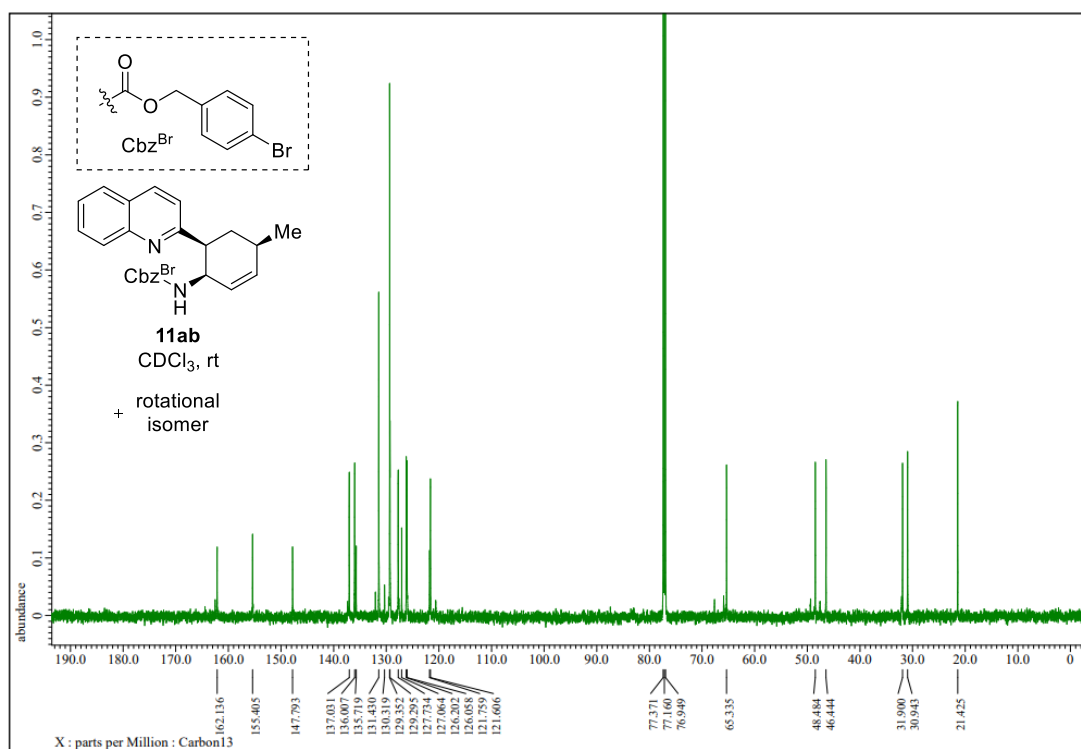



$^1\text{H}$  and  $^{13}\text{C}$  NMR charts of **12ab**.

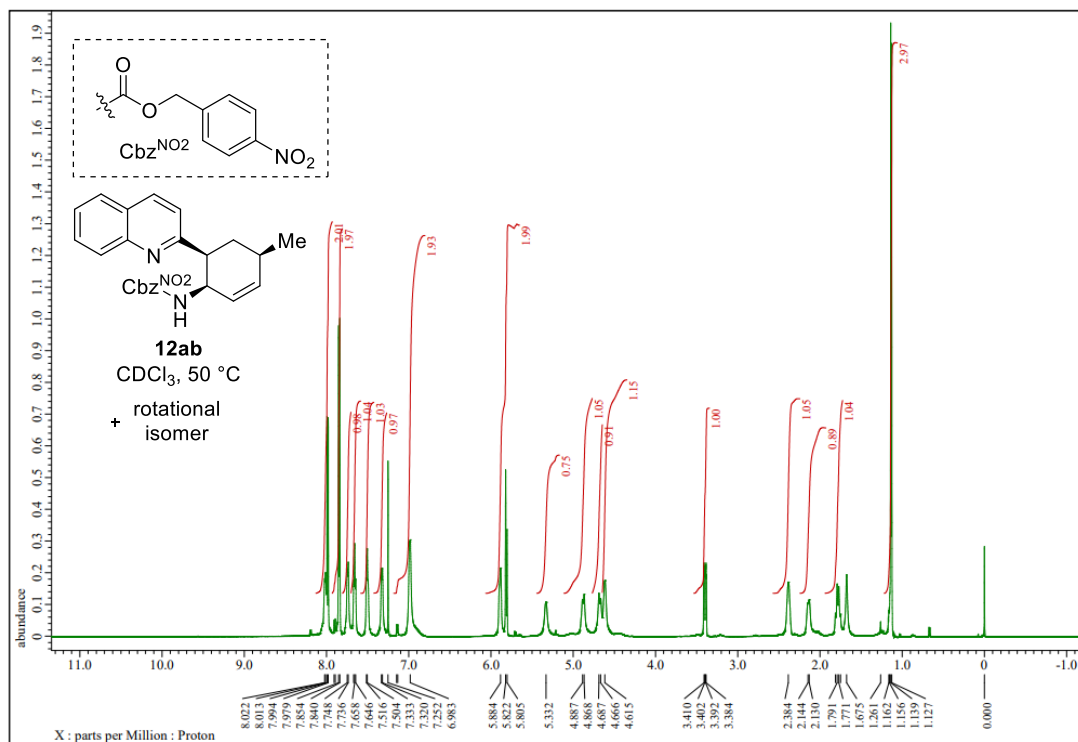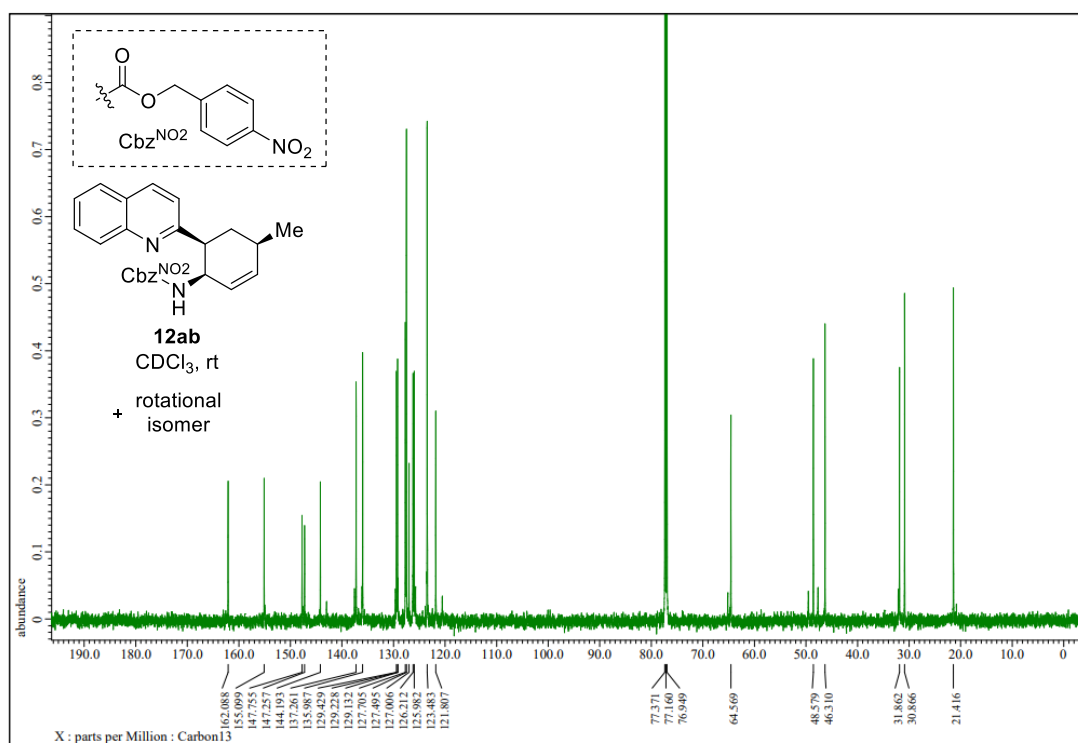

$^1\text{H}$  and  $^{13}\text{C}$  NMR charts of **13ab**.

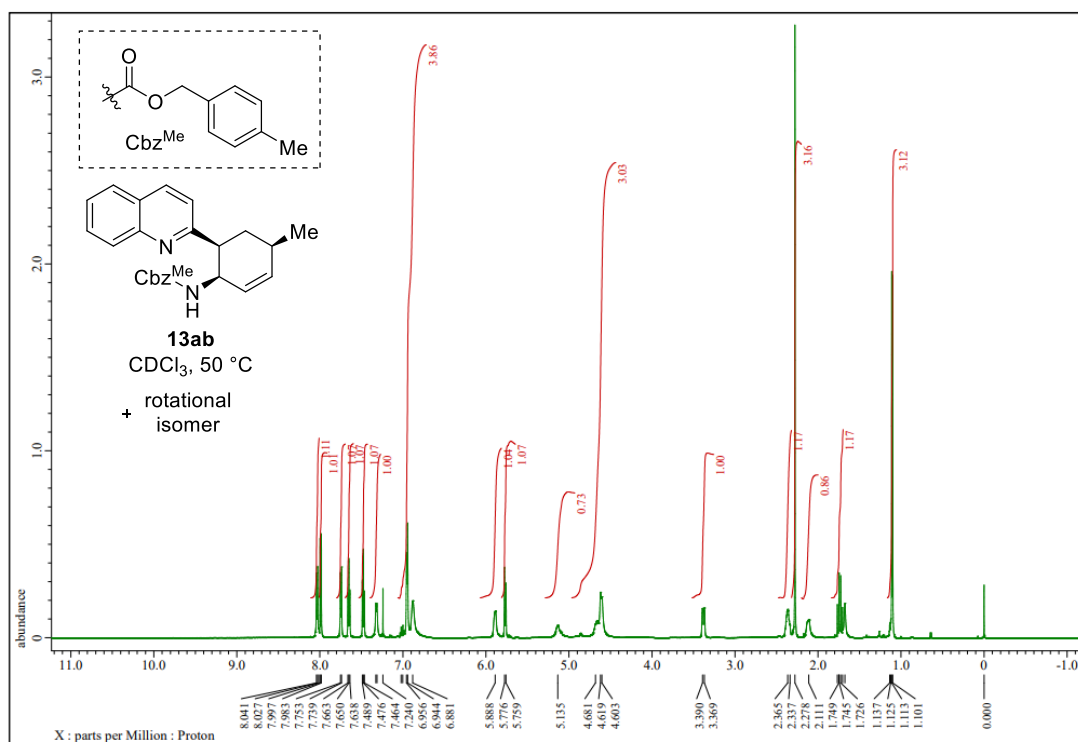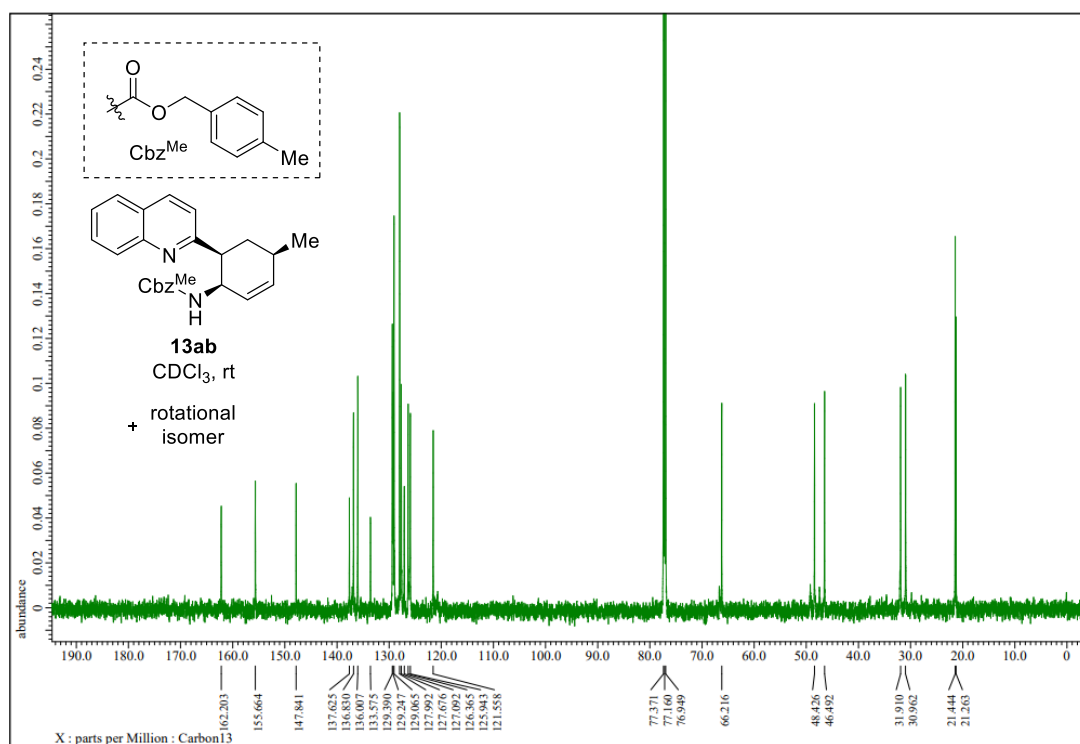

$^1\text{H}$  and  $^{13}\text{C}$  NMR charts of **14ab**.

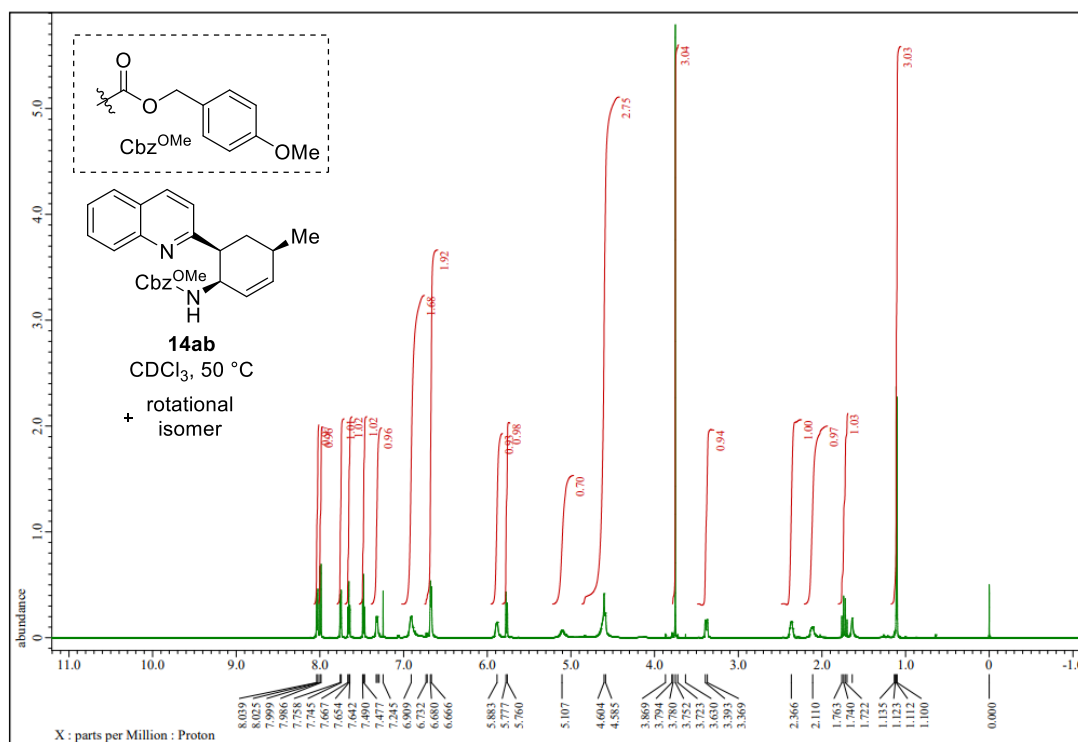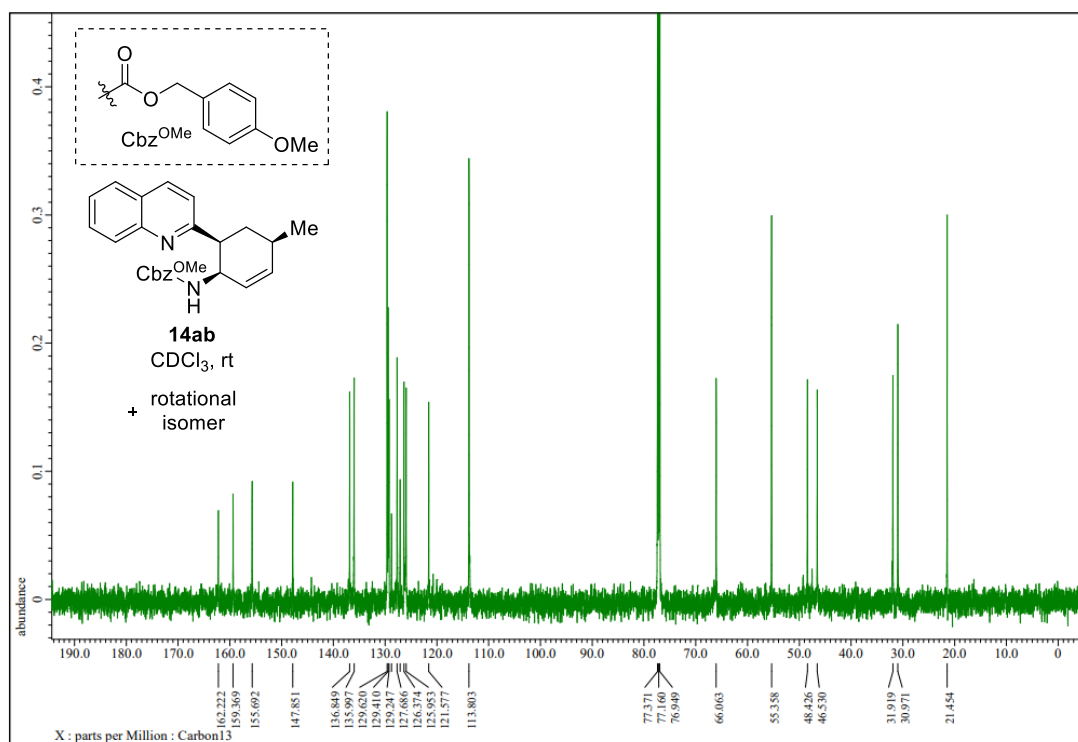

$^1\text{H}$  and  $^{13}\text{C}$  NMR charts of **3ba**.

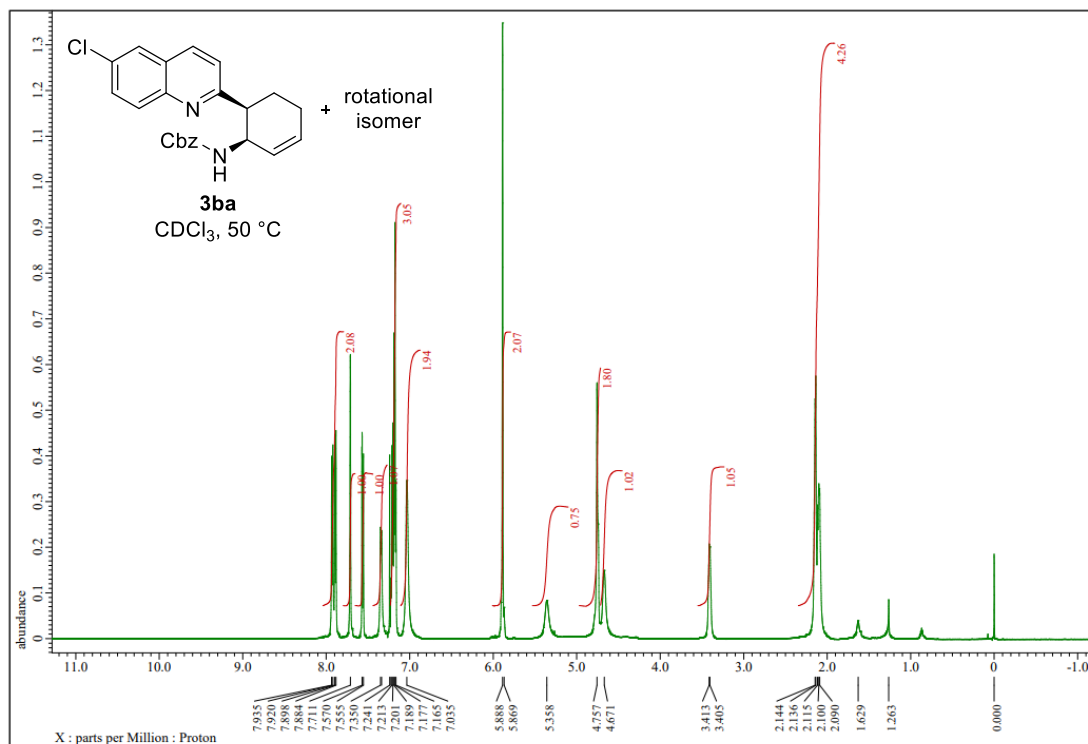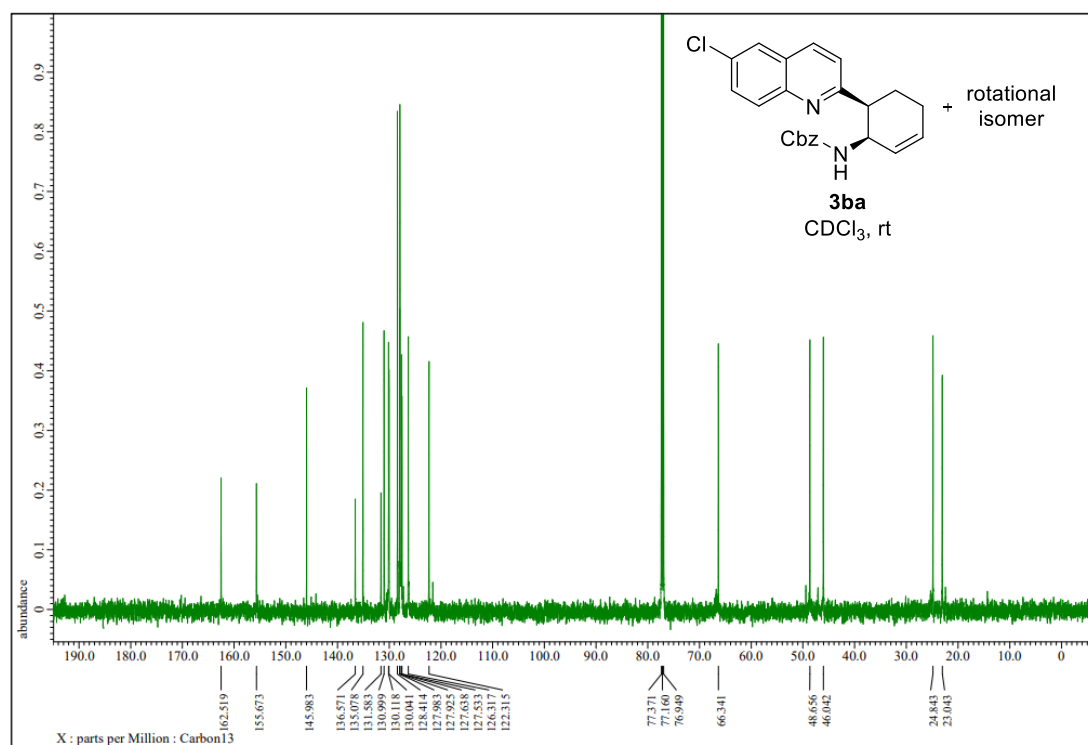

$^1\text{H}$  and  $^{13}\text{C}$  NMR charts of **3ca**.

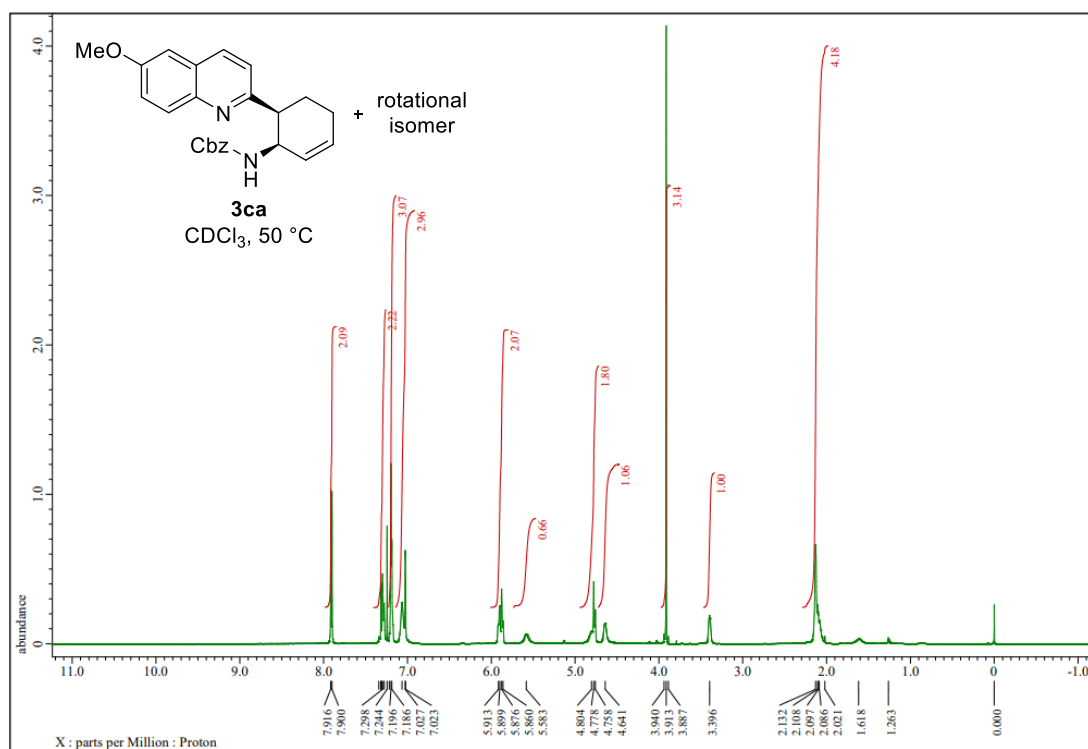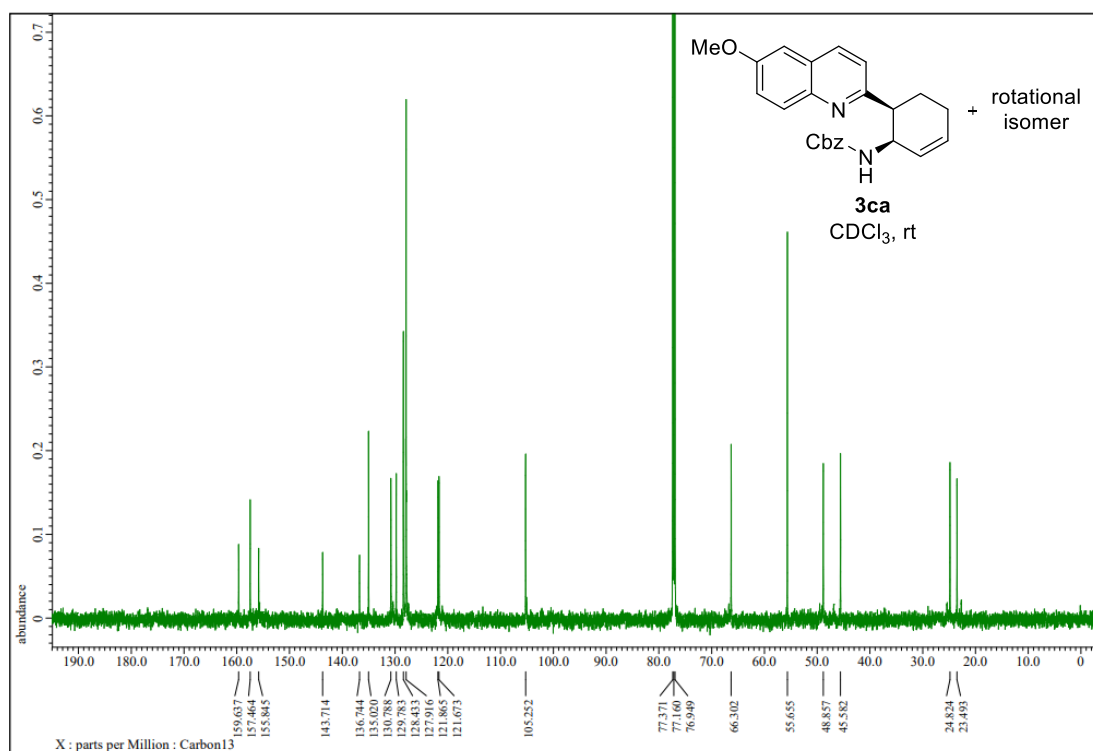

$^1\text{H}$  and  $^{13}\text{C}$  NMR charts of **3da**.

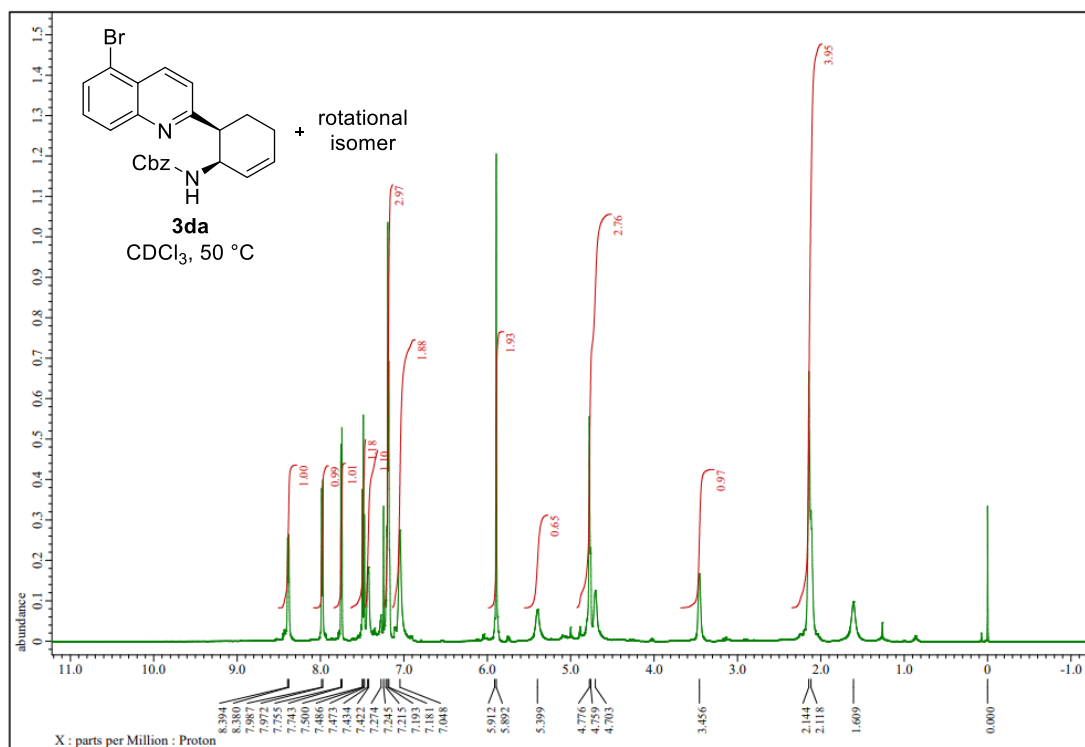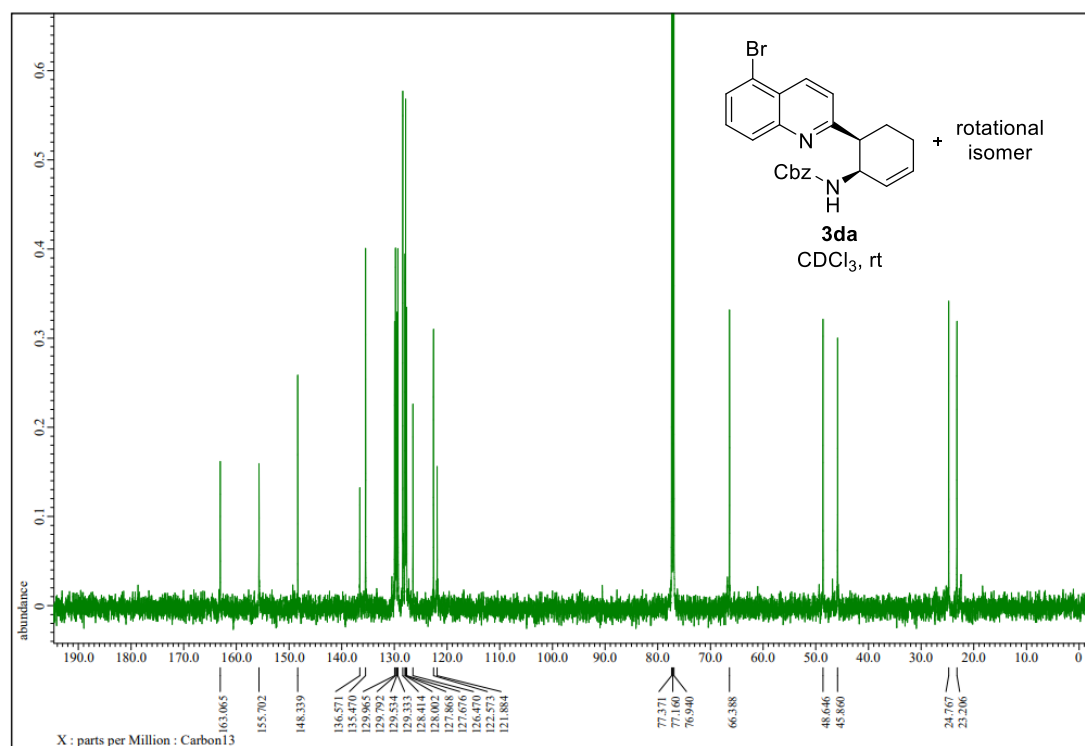

$^1\text{H}$  and  $^{13}\text{C}$  NMR charts of **3ea**.

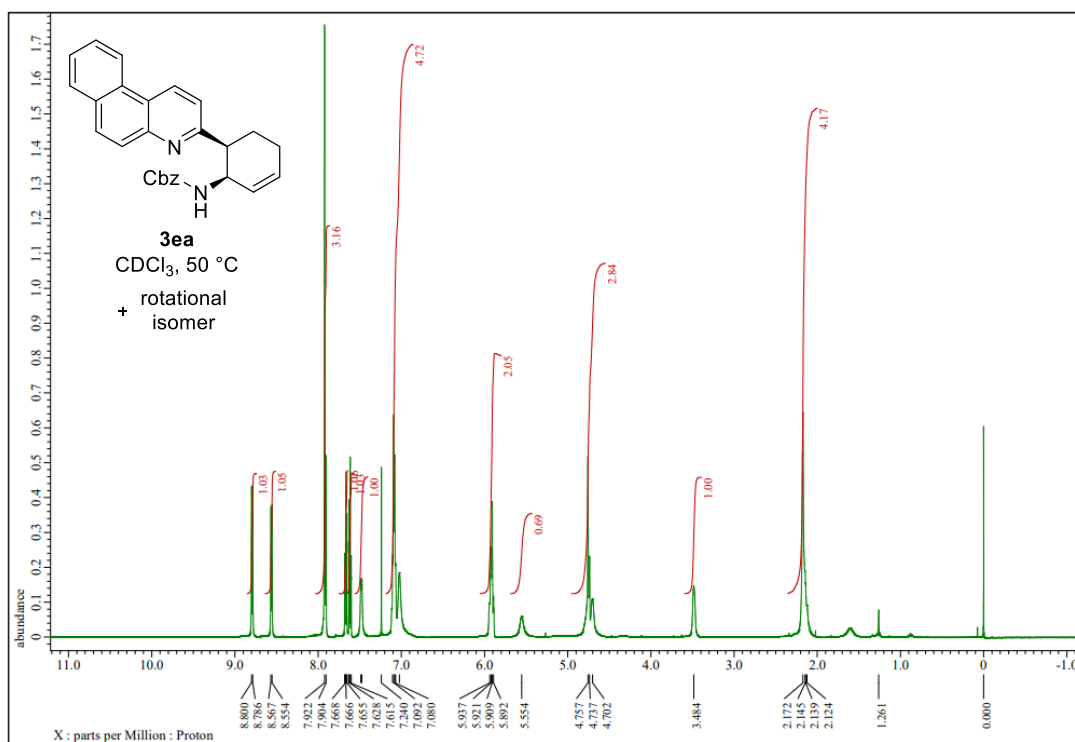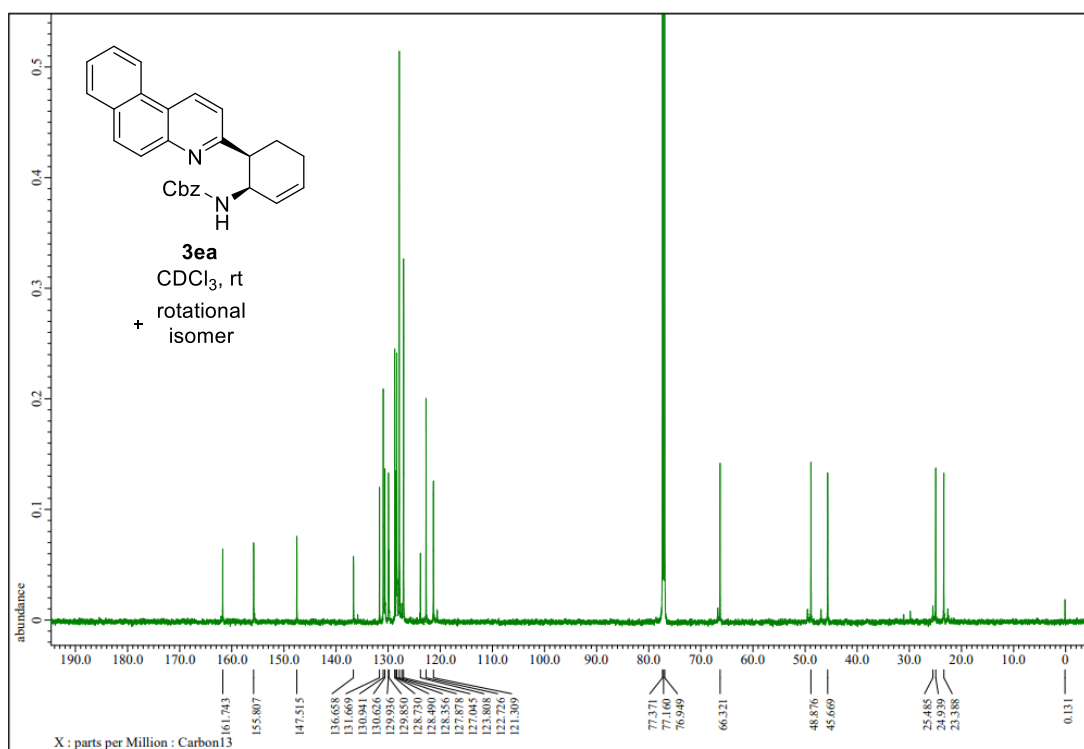

$^1\text{H}$  and  $^{13}\text{C}$  NMR charts of **3fa**.

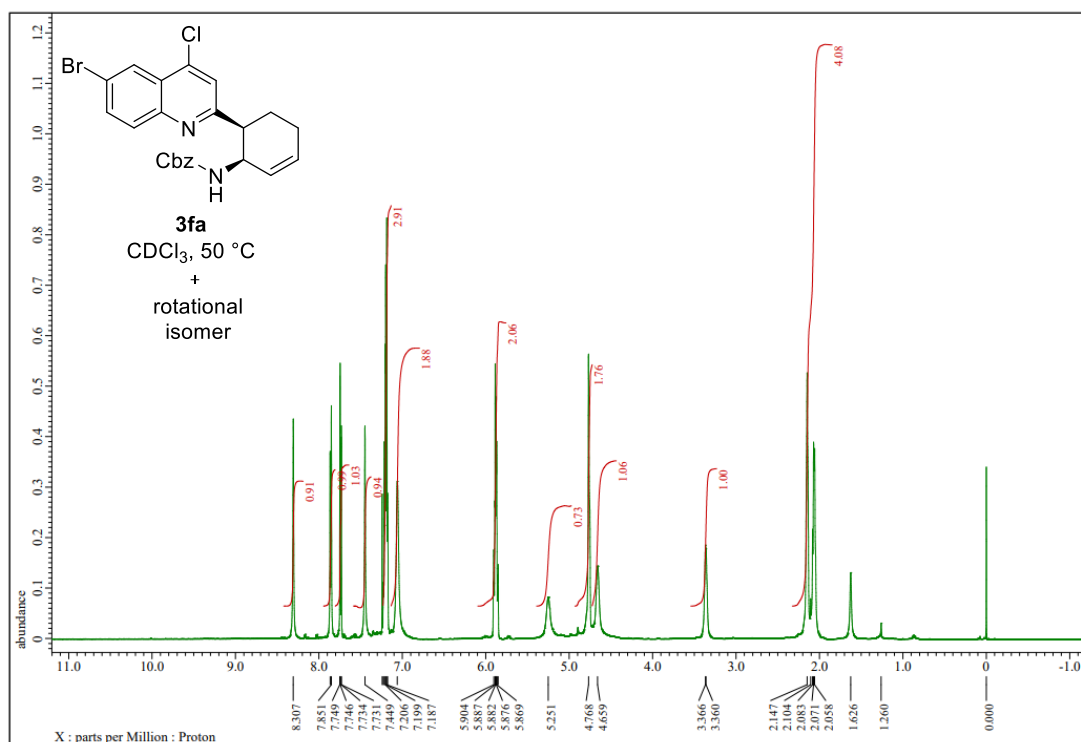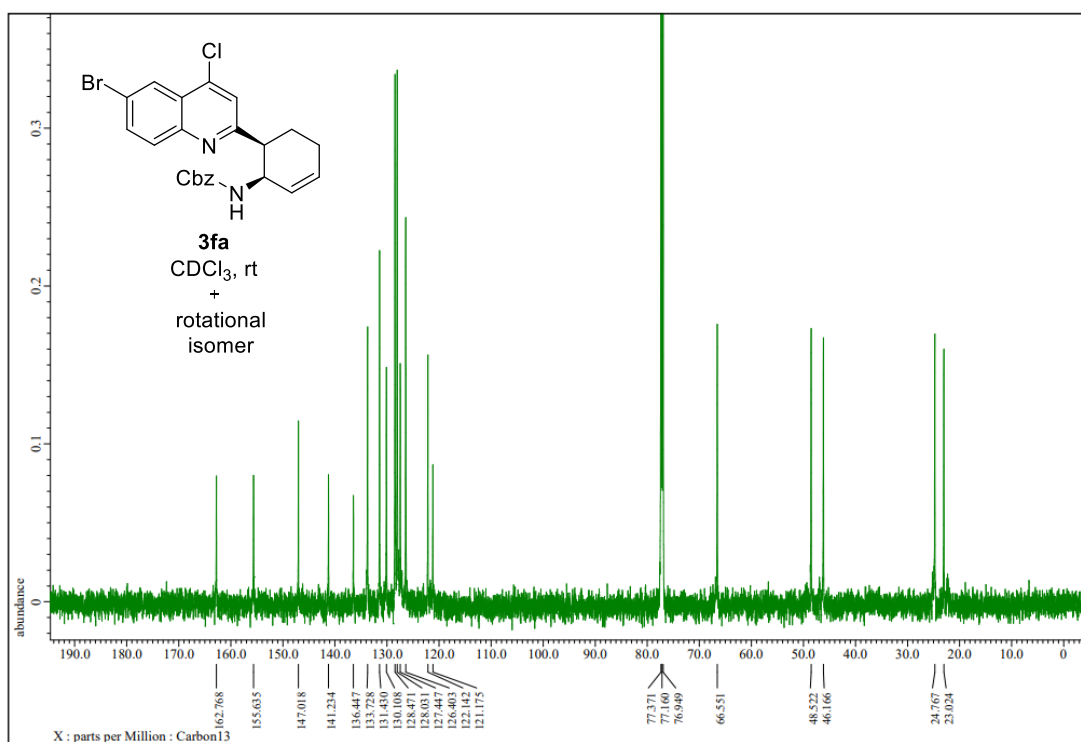



$^1\text{H}$ ,  $^{13}\text{C}$  and  $^{19}\text{F}$  NMR charts of **3ga**.

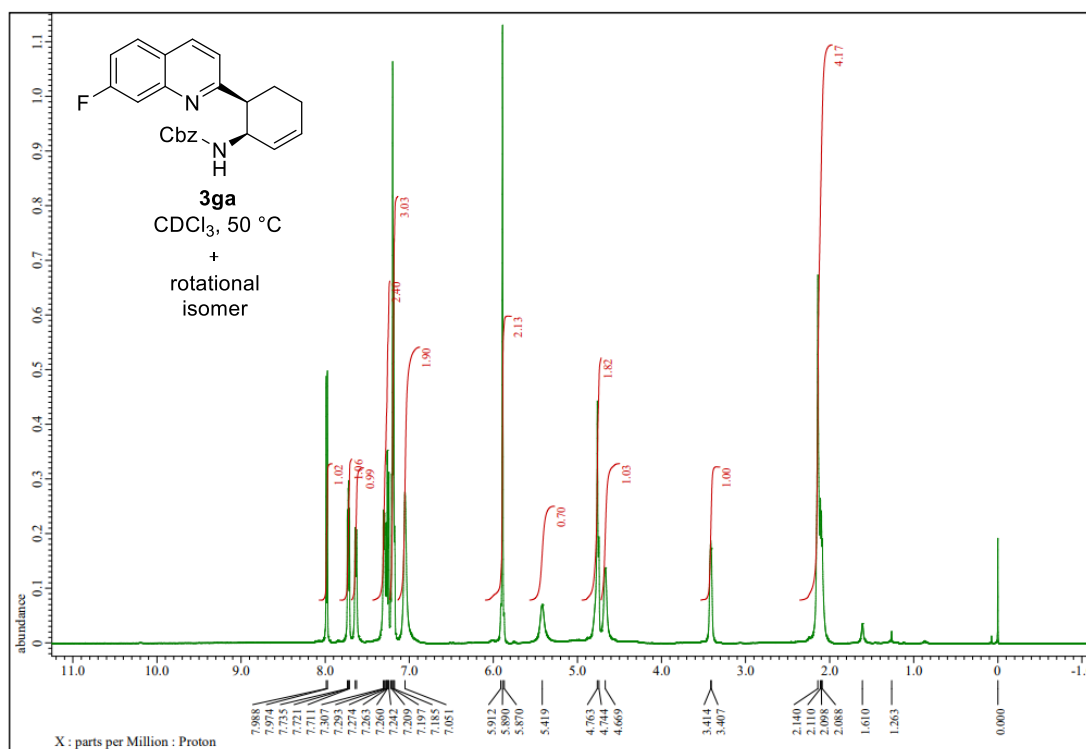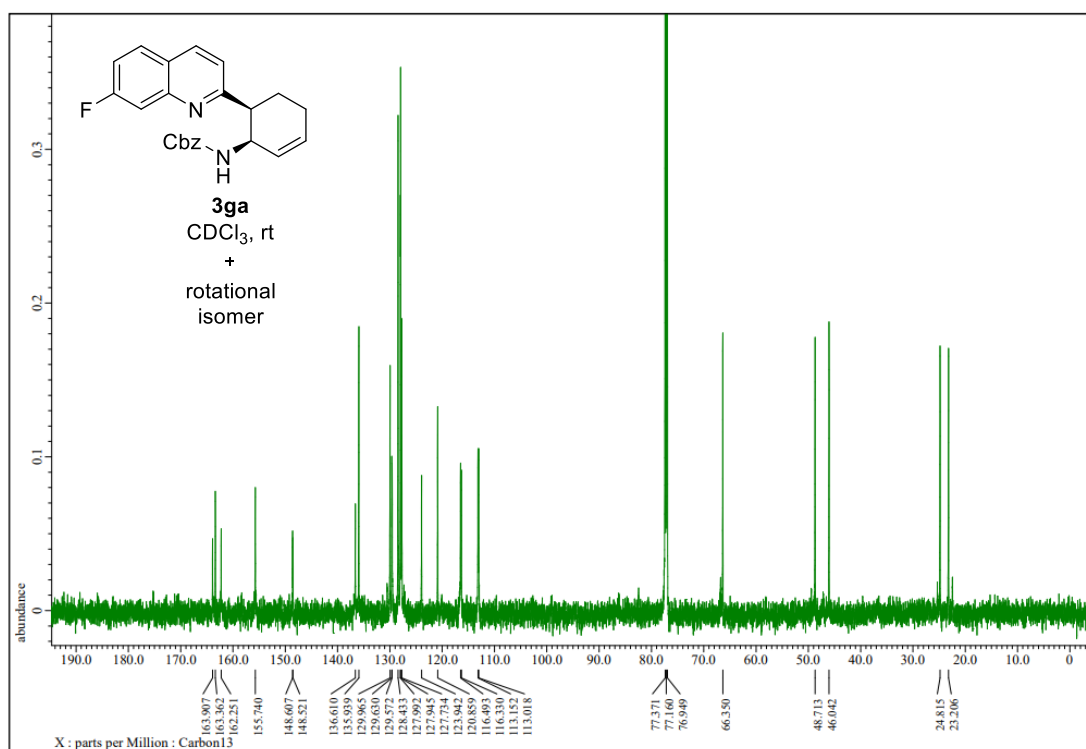

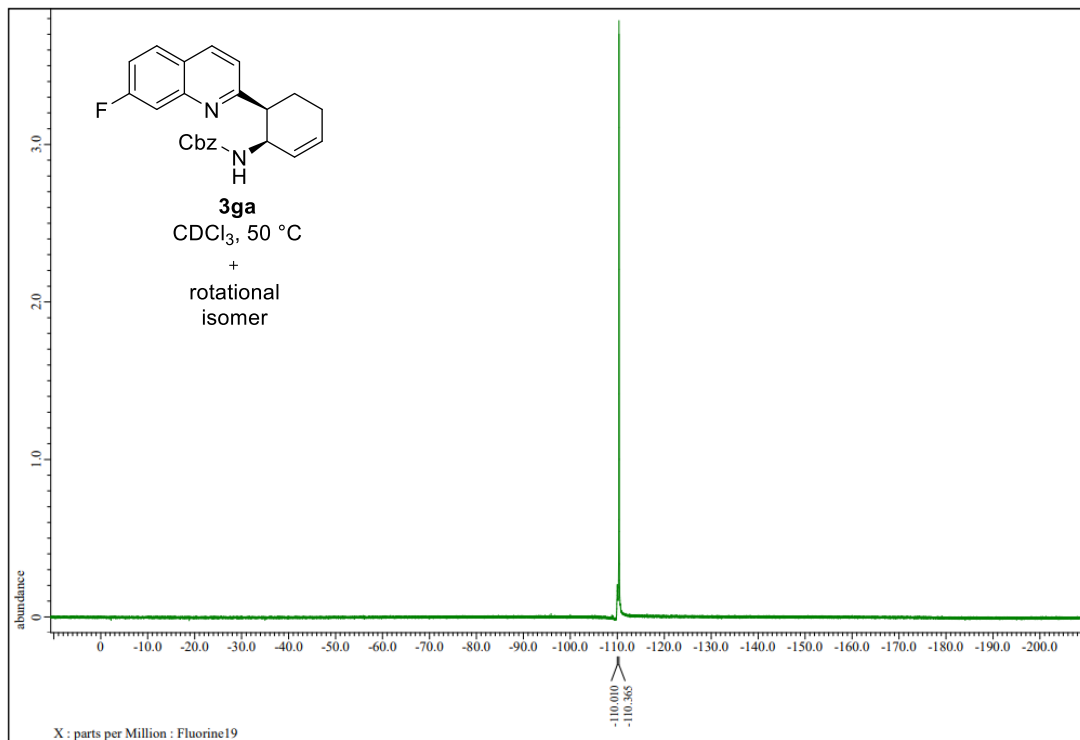

$^1\text{H}$  and  $^{13}\text{C}$  NMR charts of **3ha**.

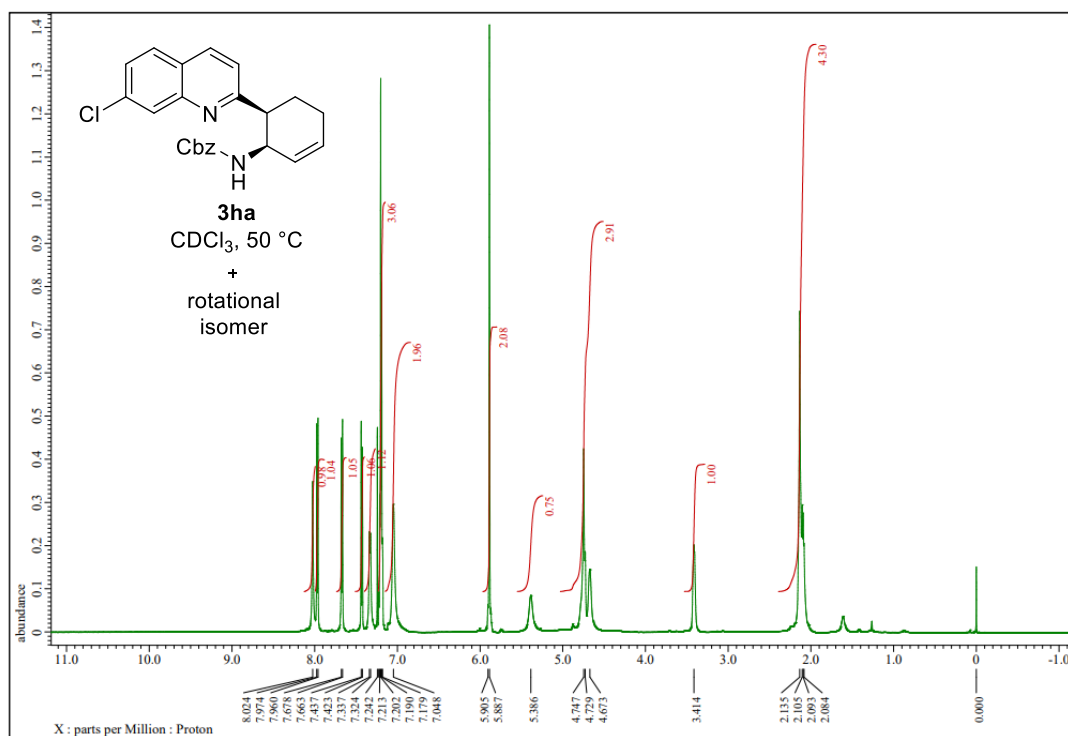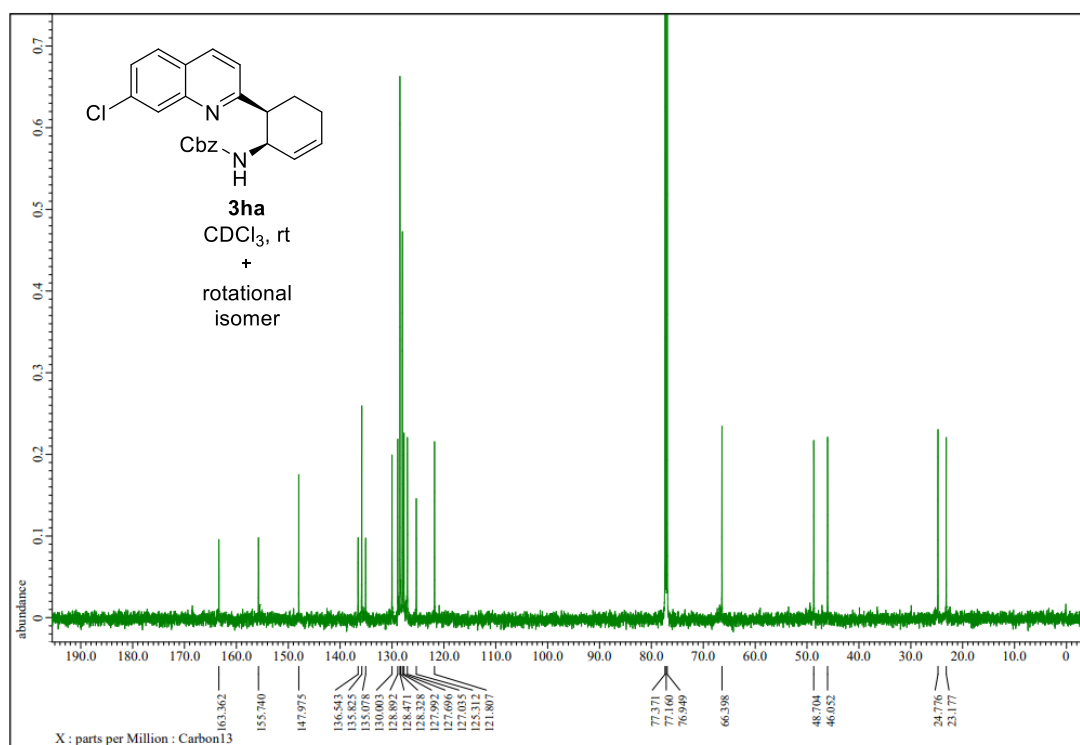

$^1\text{H}$  and  $^{13}\text{C}$  NMR charts of **3ac**.

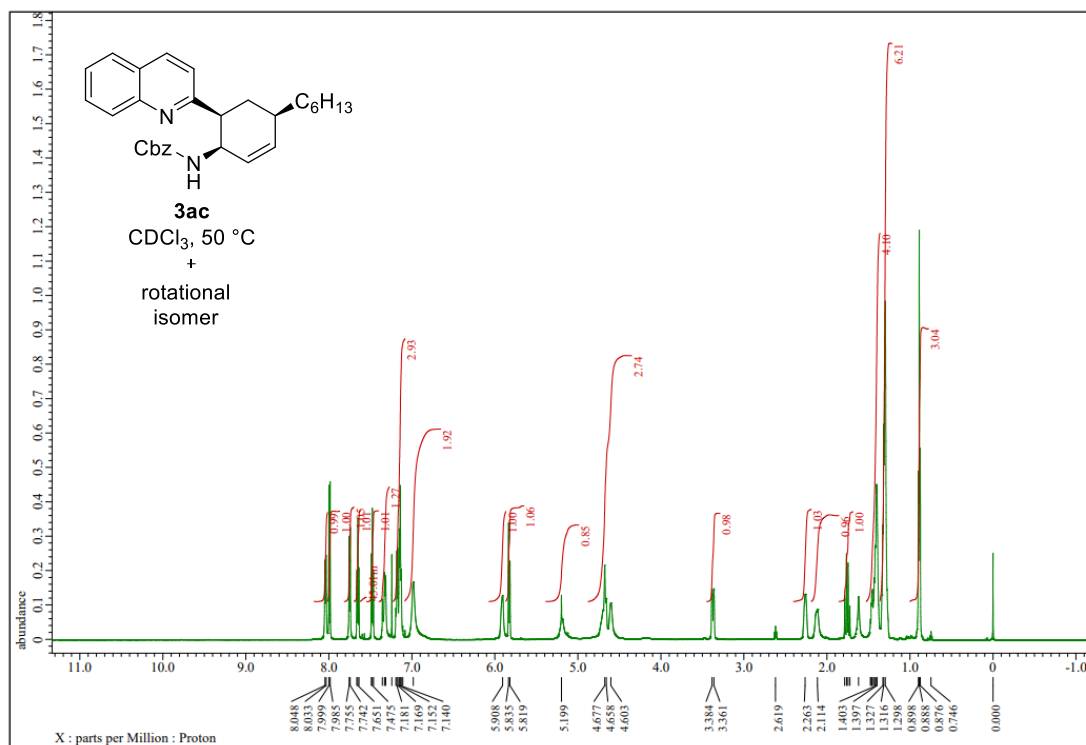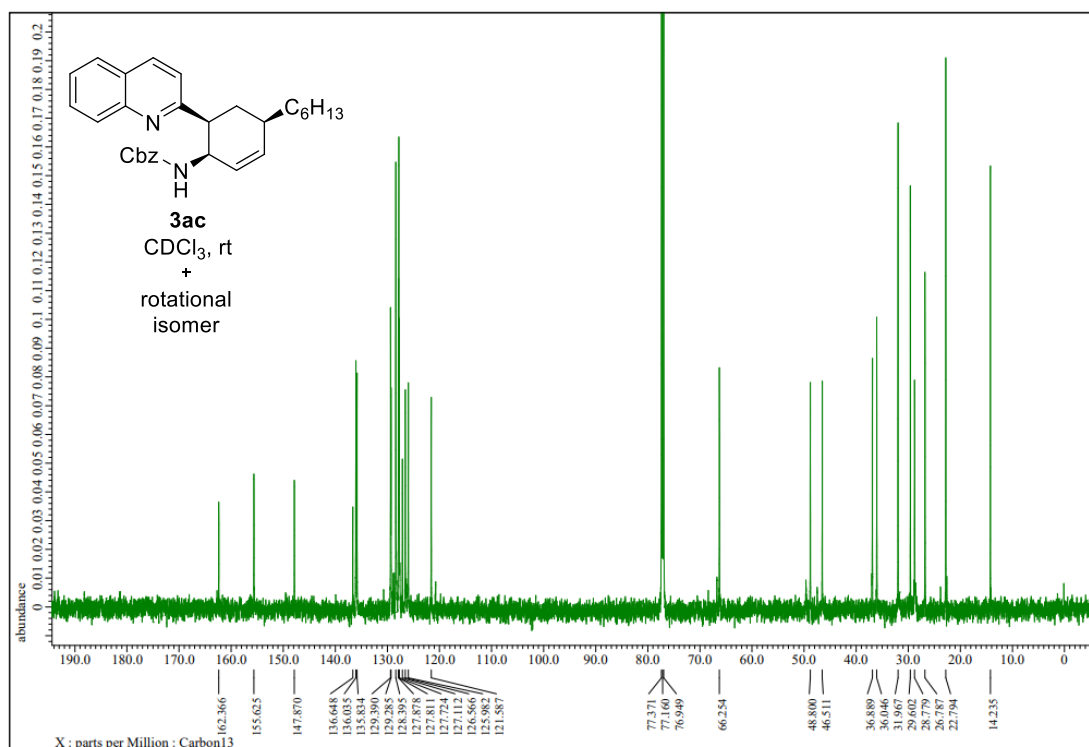

$^1\text{H}$  and  $^{13}\text{C}$  NMR charts of **3ad**.

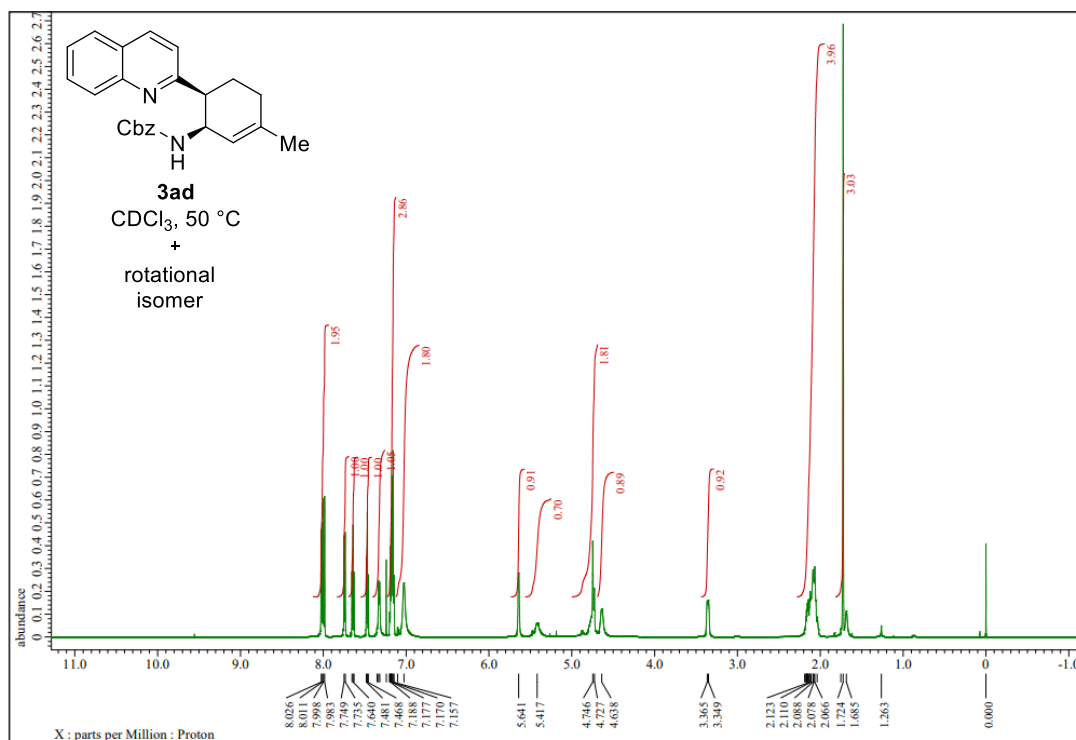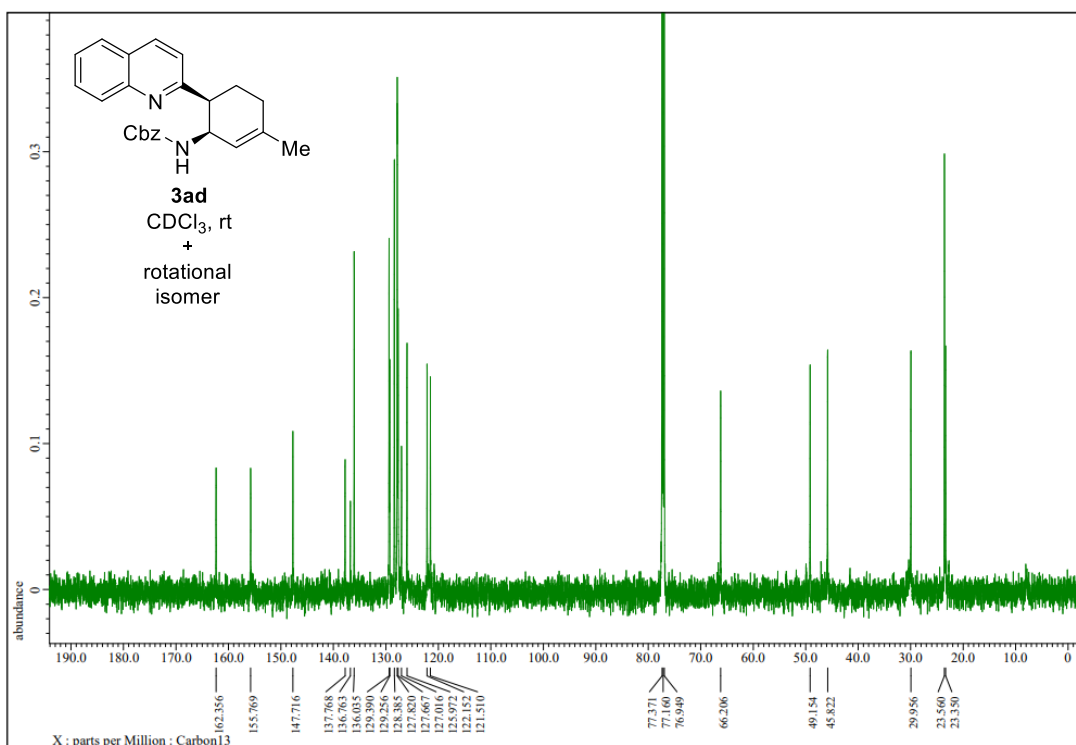

$^1\text{H}$  and  $^{13}\text{C}$  NMR charts of **12aa**.

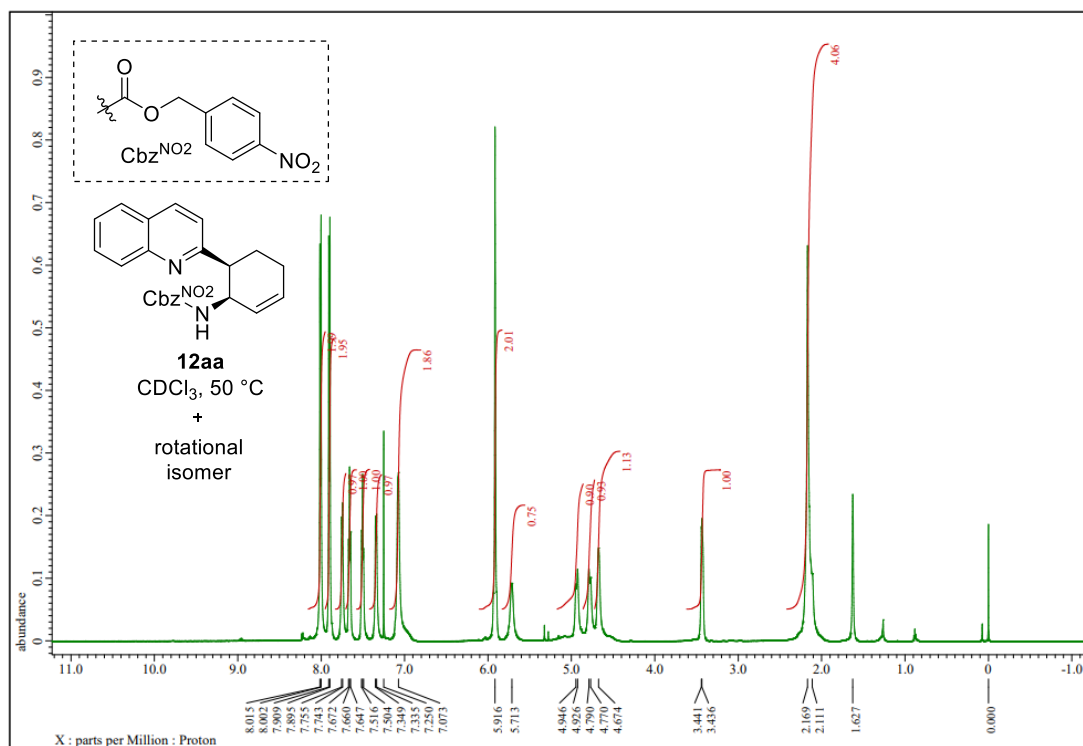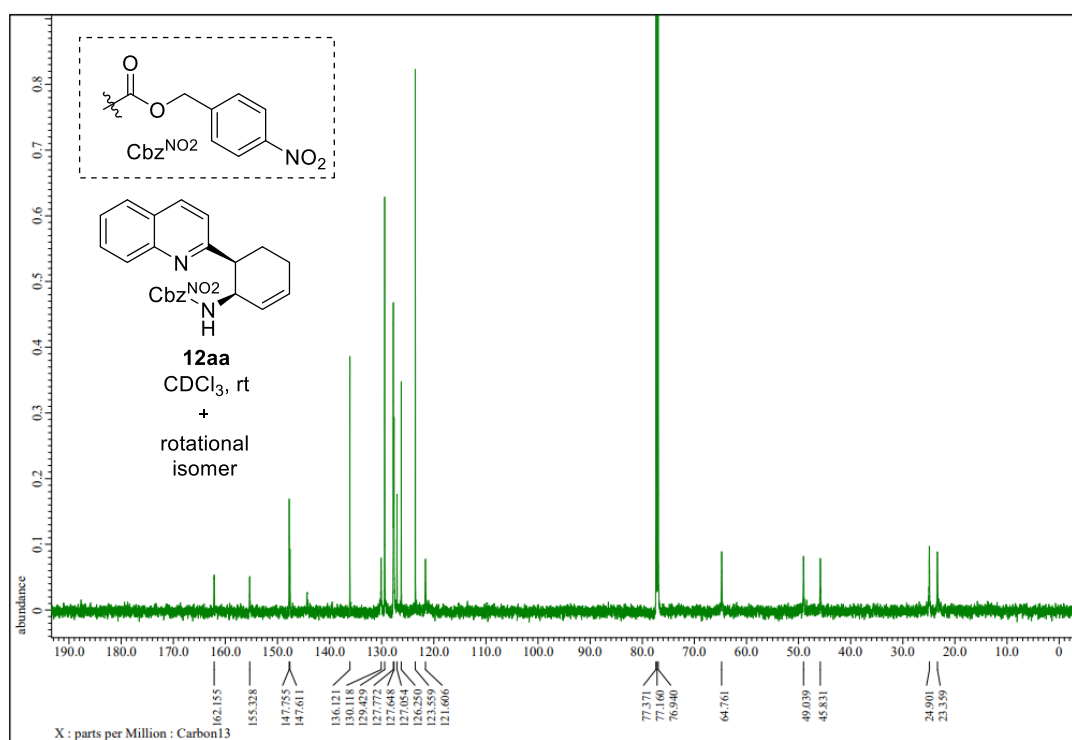

$^1\text{H}$  and  $^{13}\text{C}$  NMR charts of **12ba**.

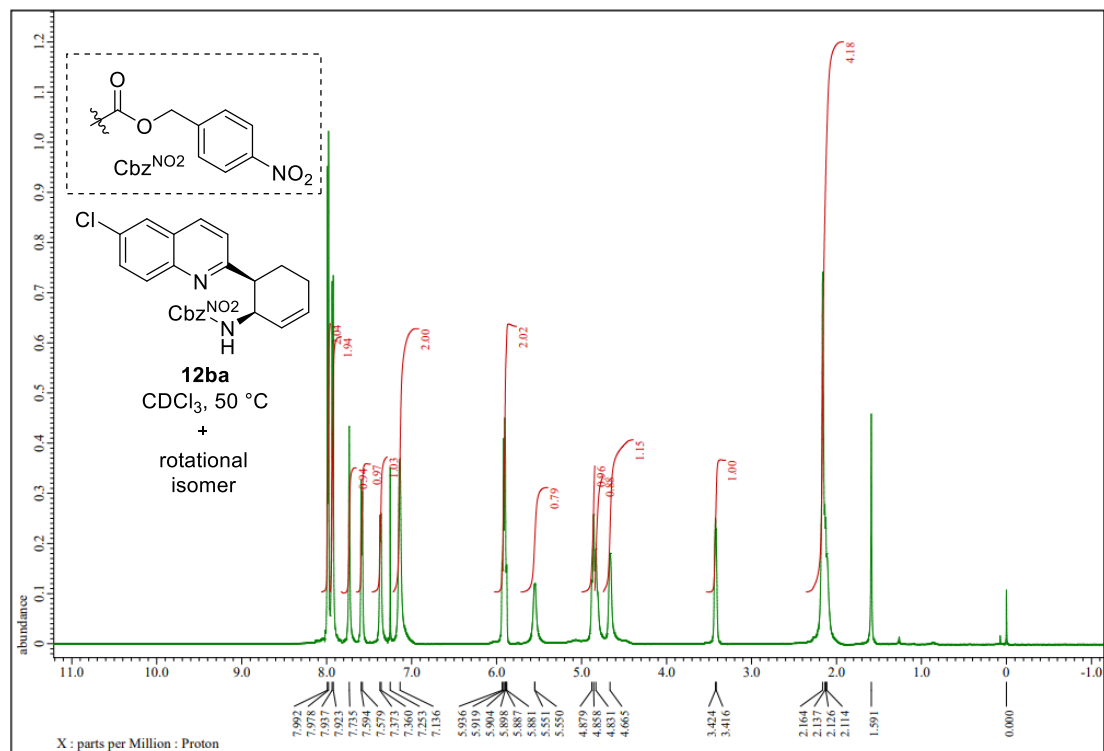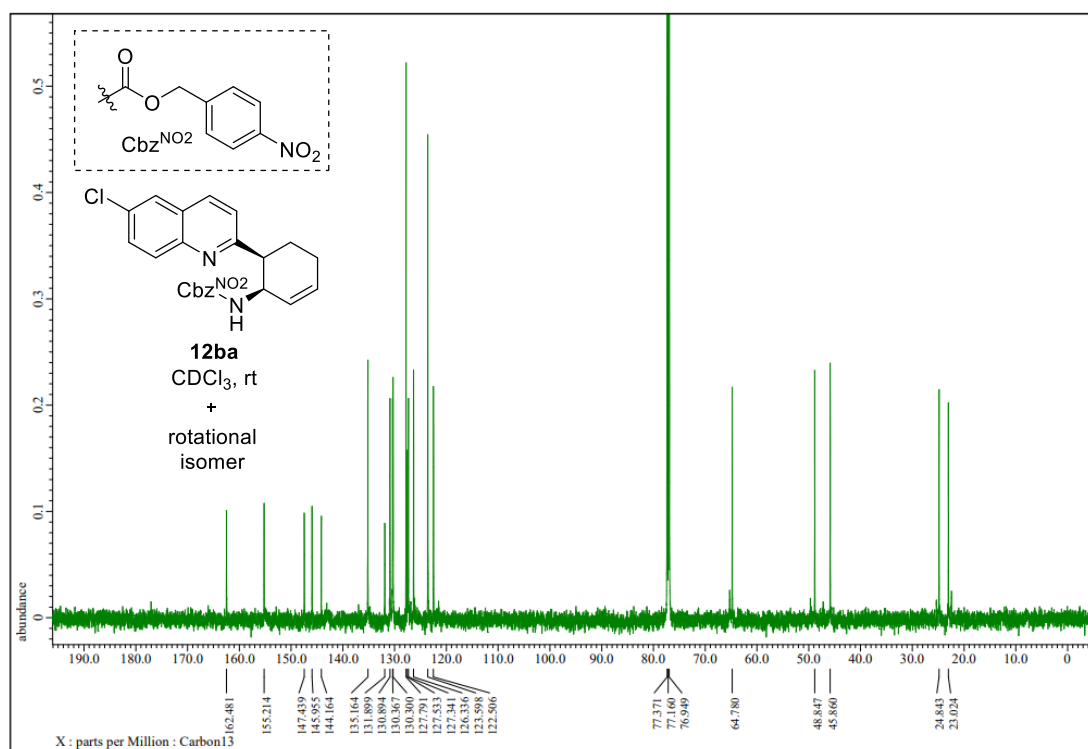

$^1\text{H}$  and  $^{13}\text{C}$  NMR charts of **12ca**.

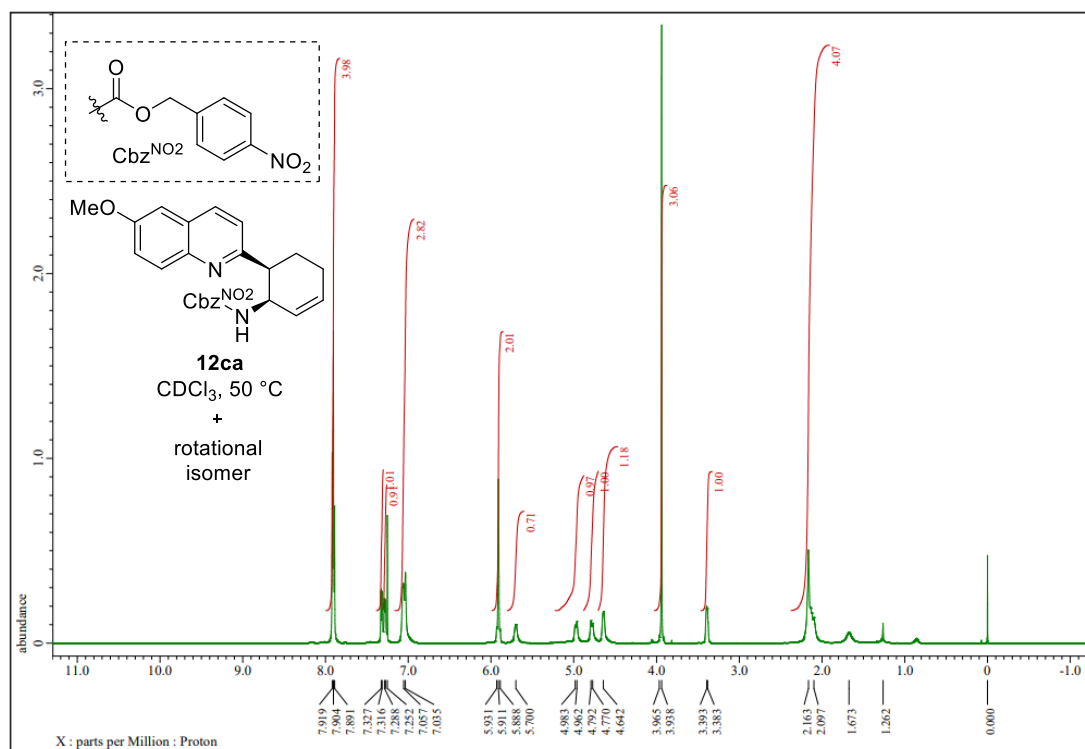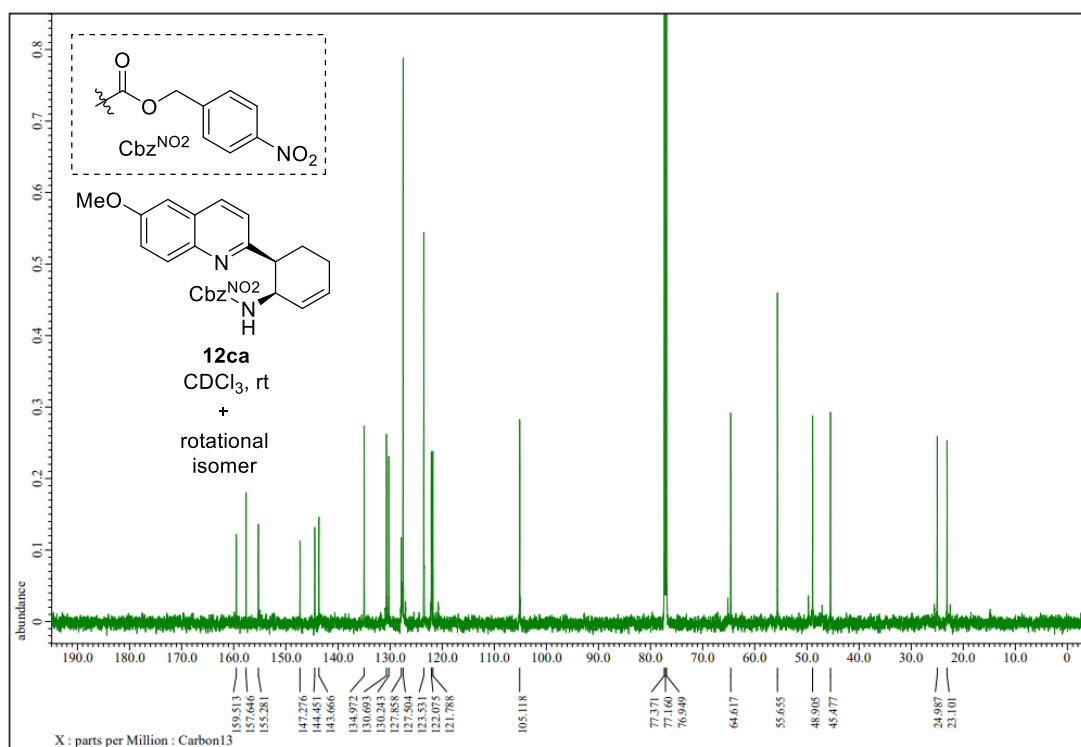



$^1\text{H}$  and  $^{13}\text{C}$  NMR charts of **12da**.

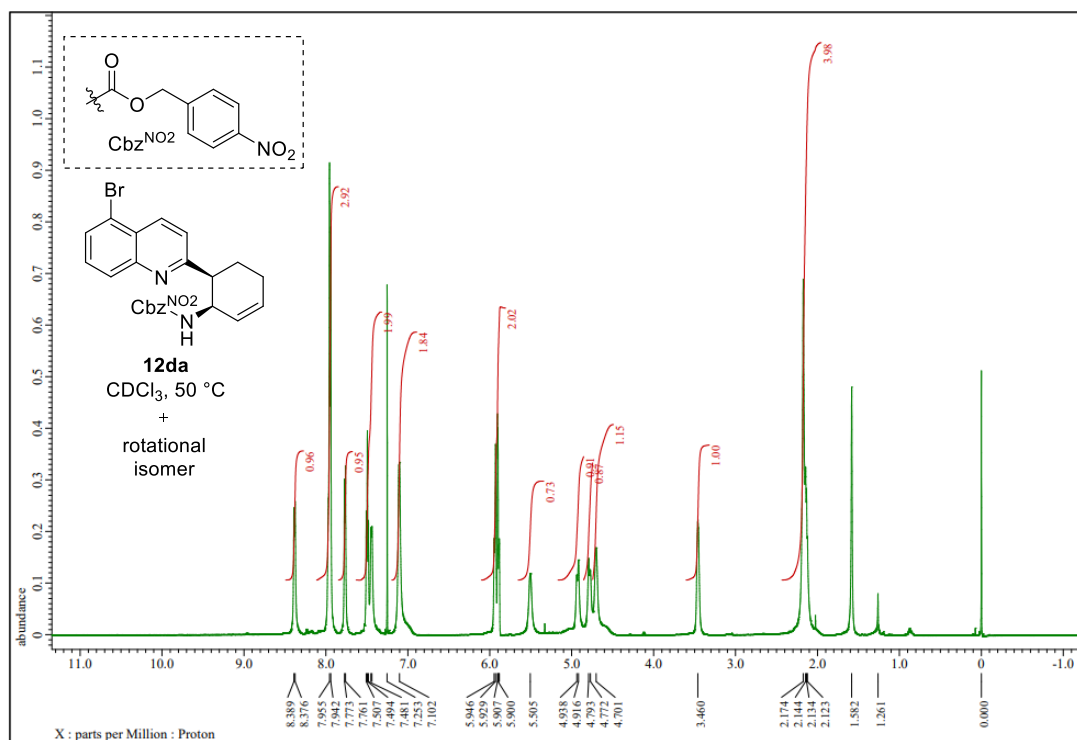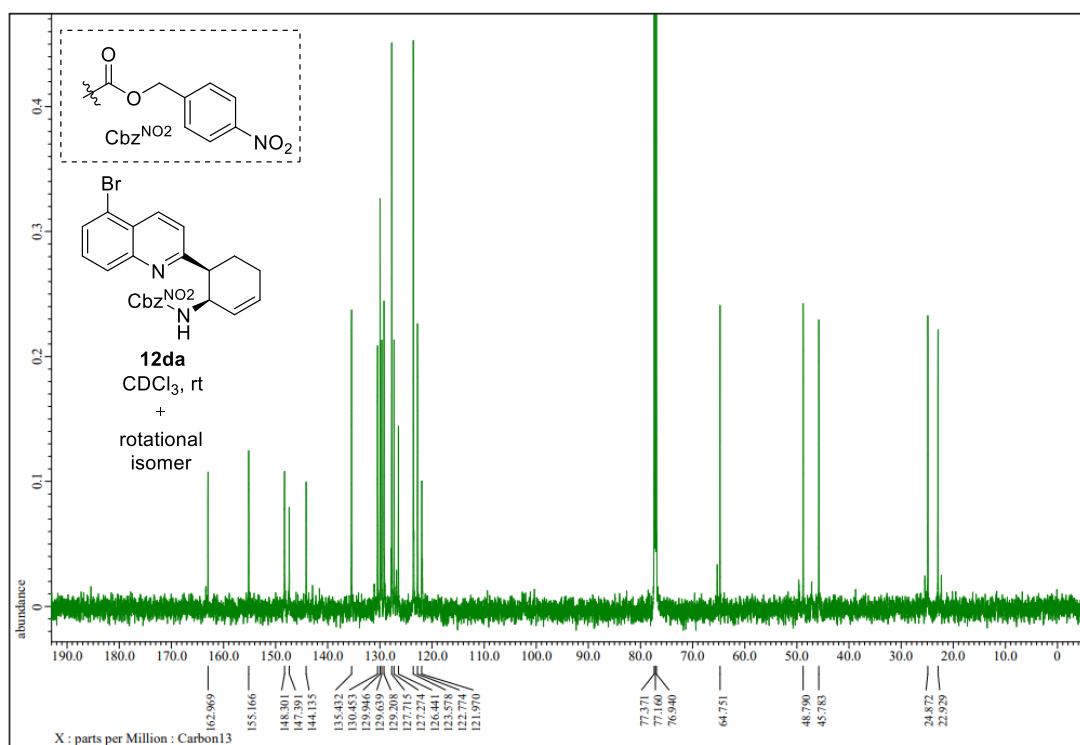

$^1\text{H}$  and  $^{13}\text{C}$  NMR charts of **12ea**.

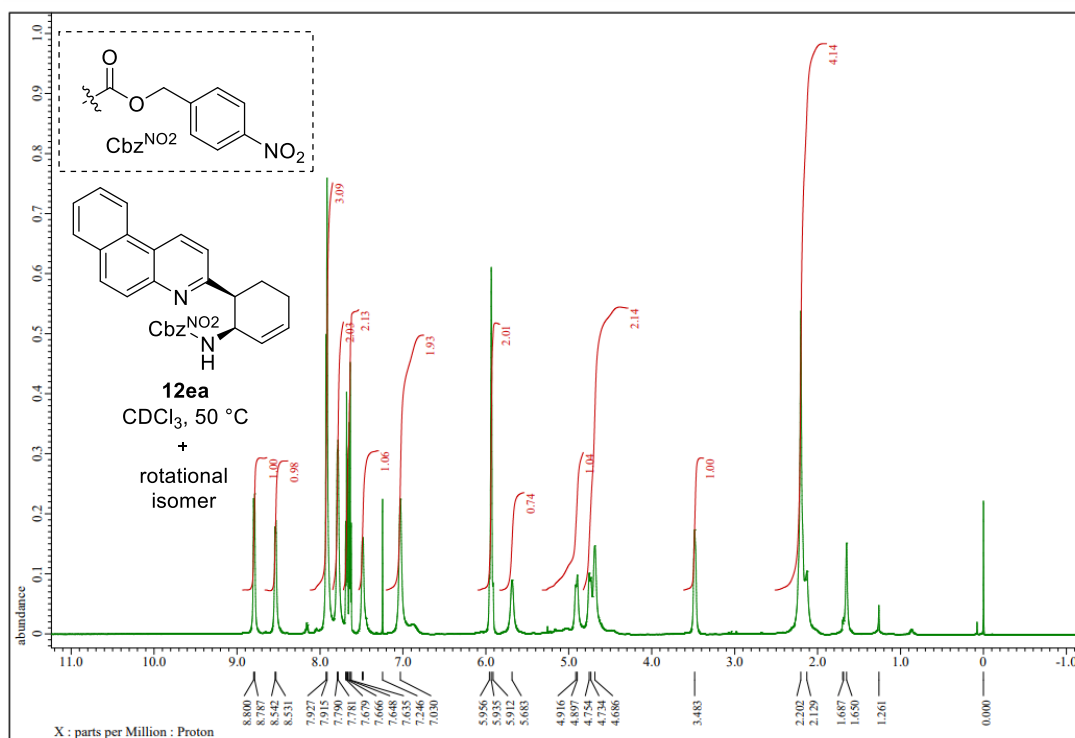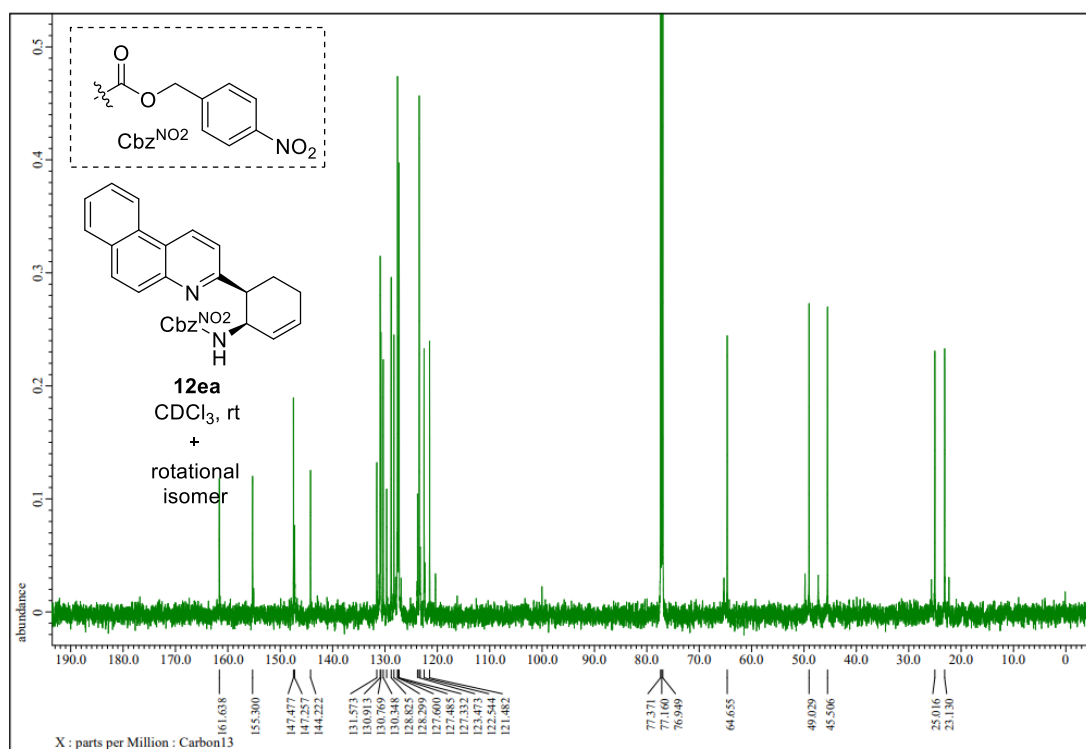

$^1\text{H}$  and  $^{13}\text{C}$  NMR charts of **12fa**.

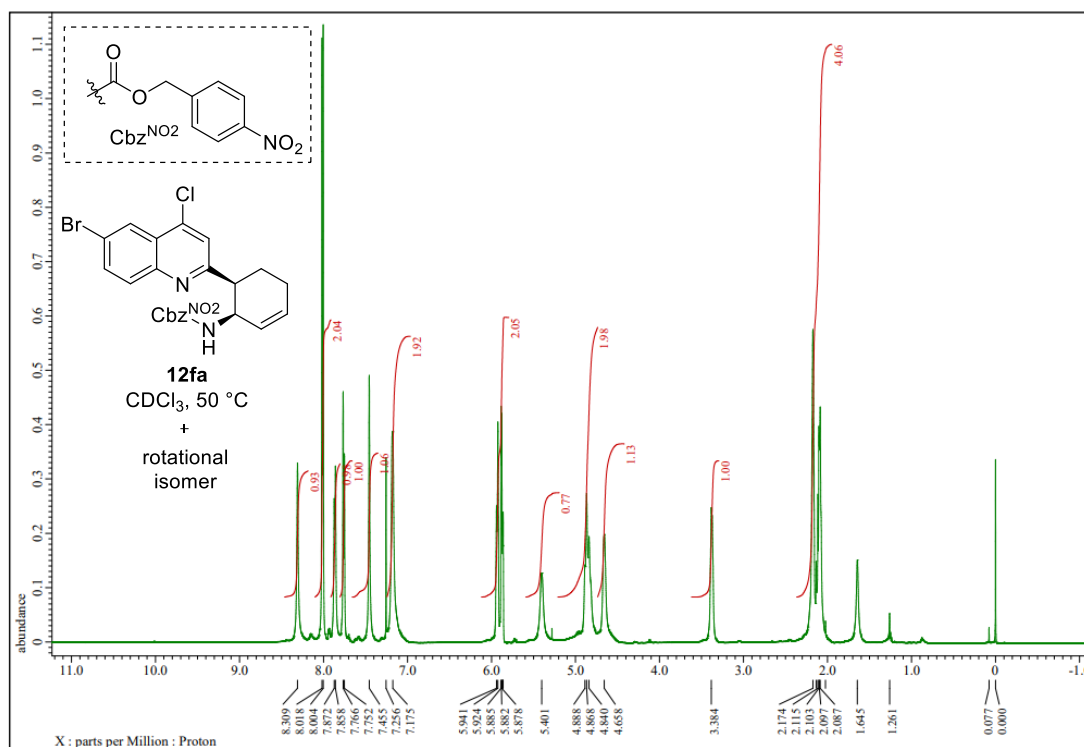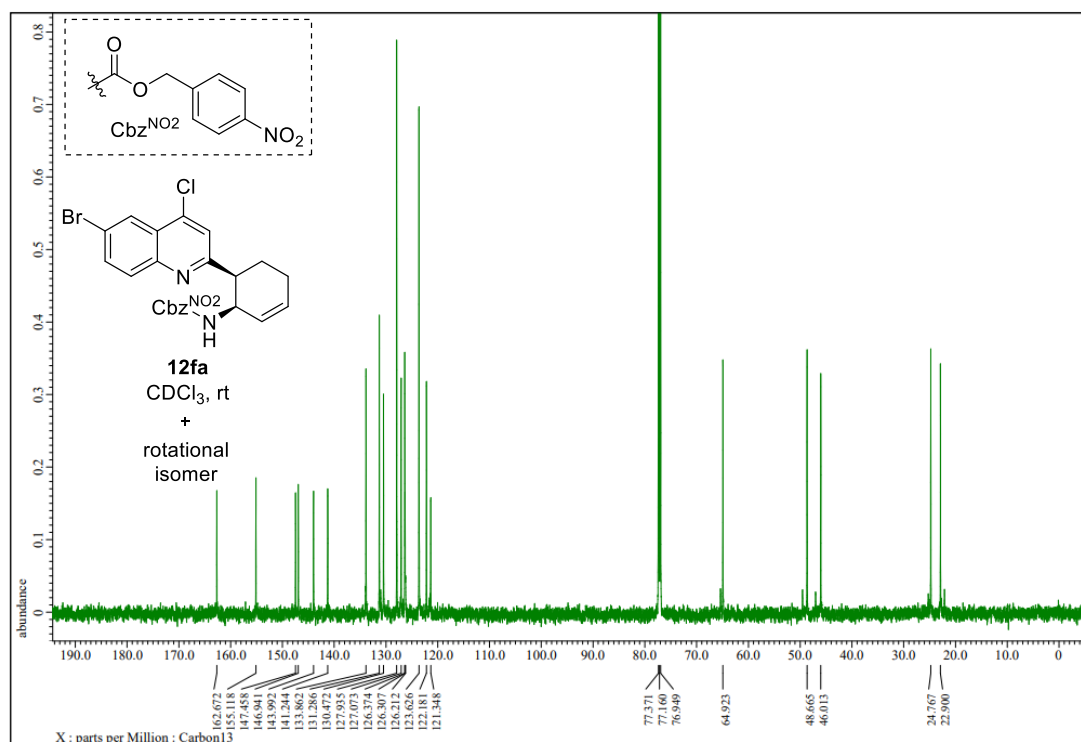

$^1\text{H}$ ,  $^{13}\text{C}$  and  $^{19}\text{F}$  NMR charts of **12ga**.

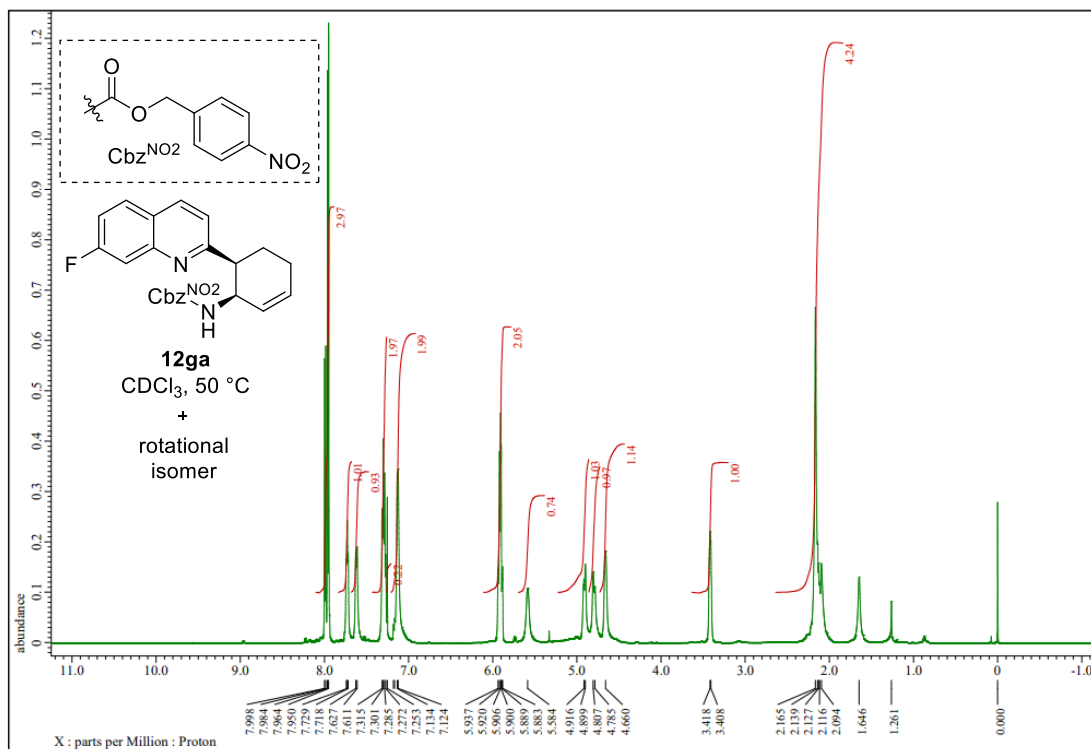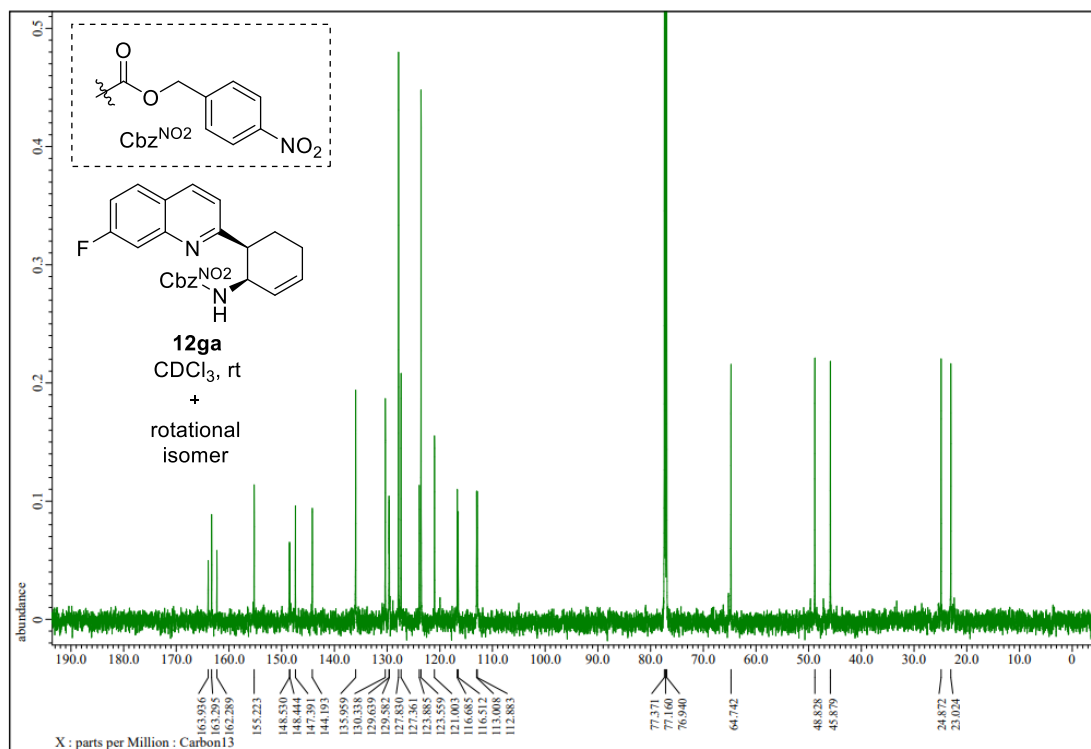

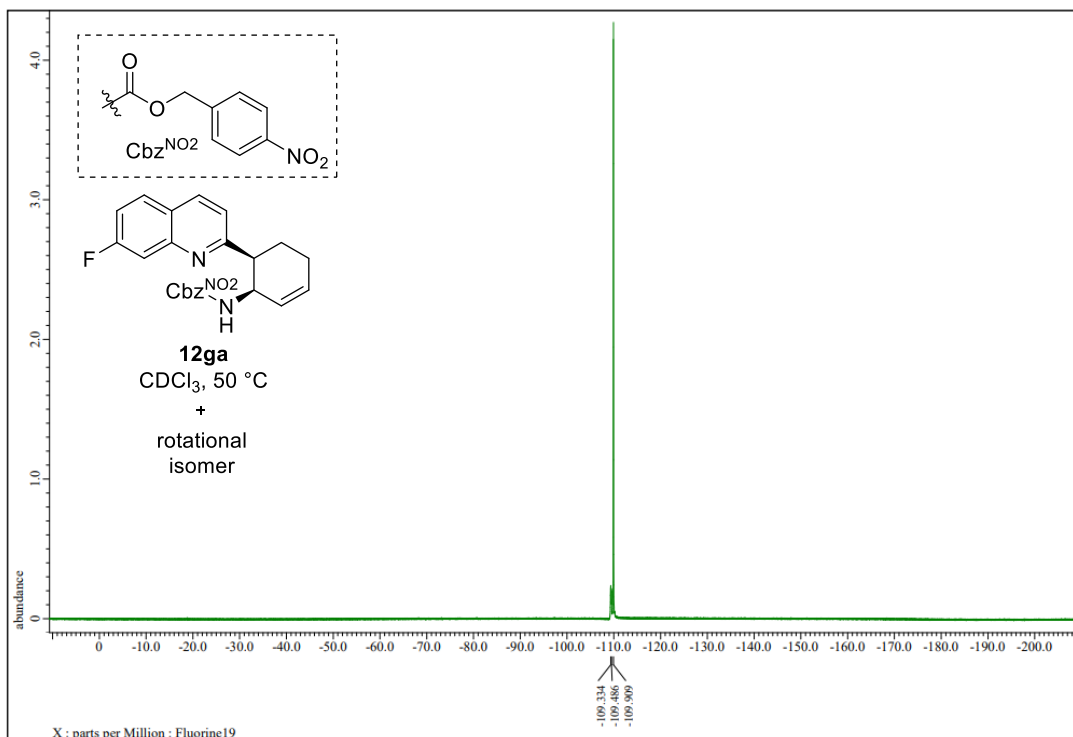

$^1\text{H}$  and  $^{13}\text{C}$  NMR charts of **12ha**.

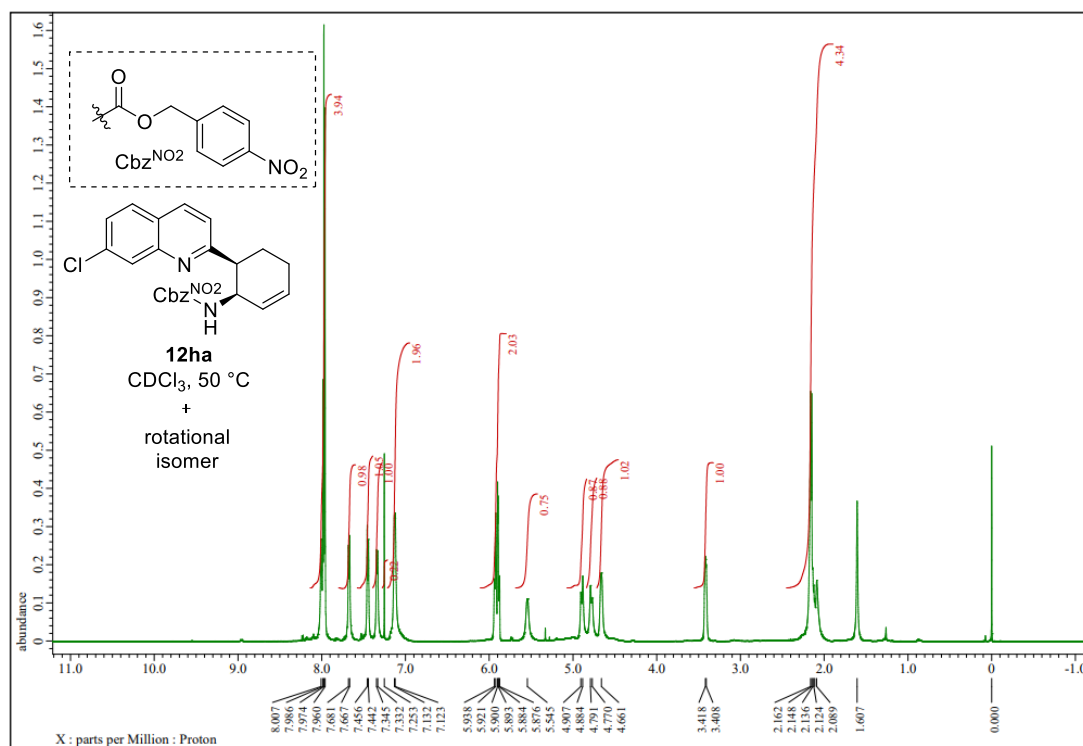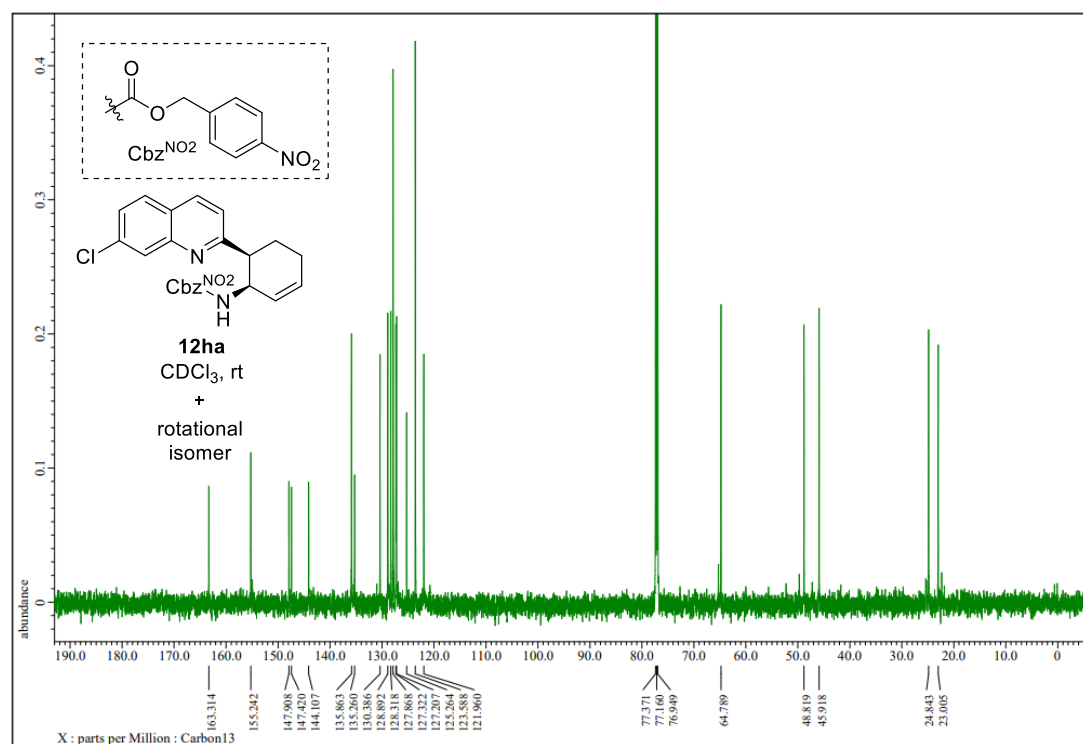

$^1\text{H}$  and  $^{13}\text{C}$  NMR charts of **12ac**.

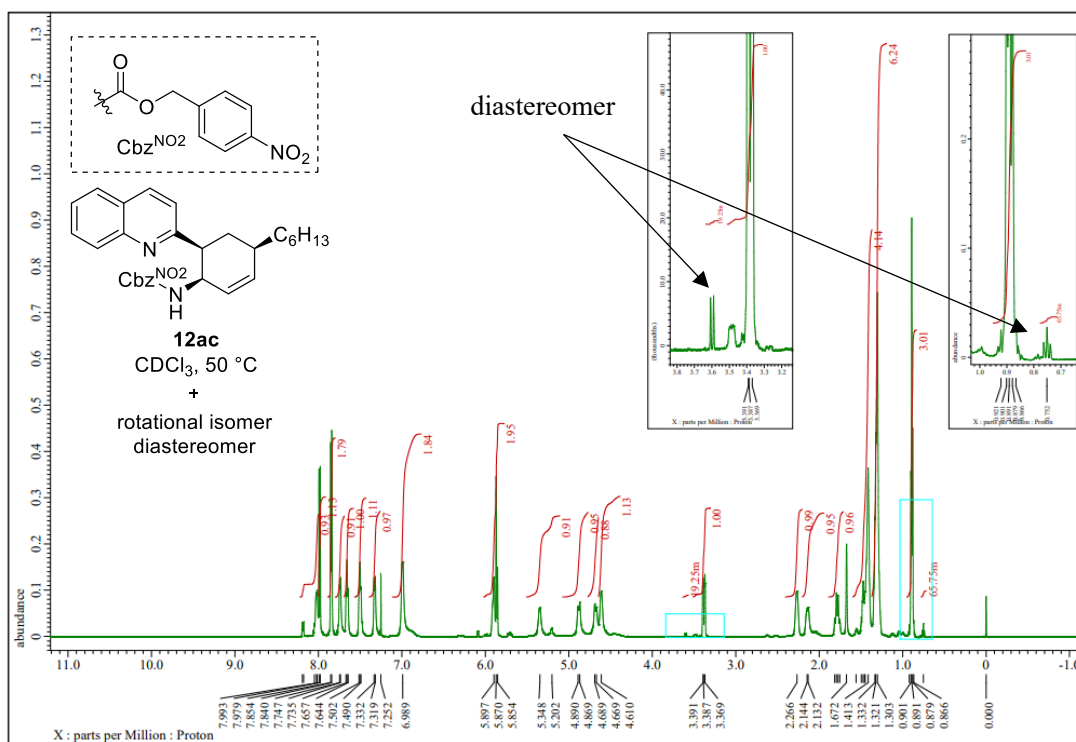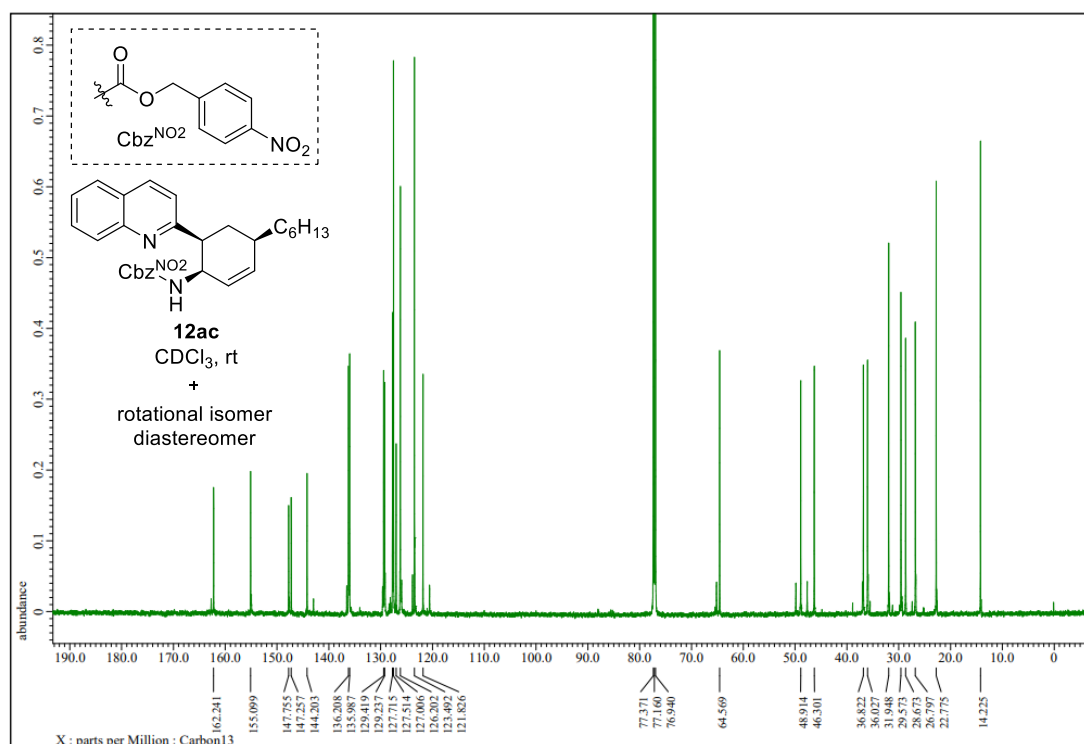

$^1\text{H}$  and  $^{13}\text{C}$  NMR charts of **12ad**.

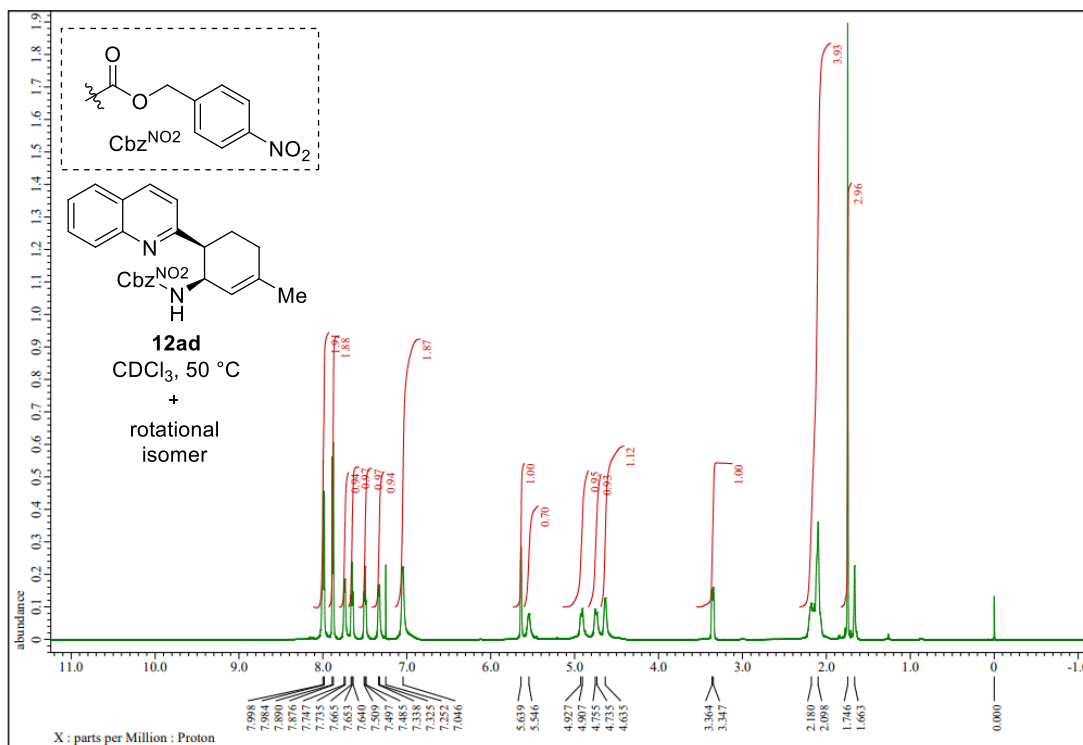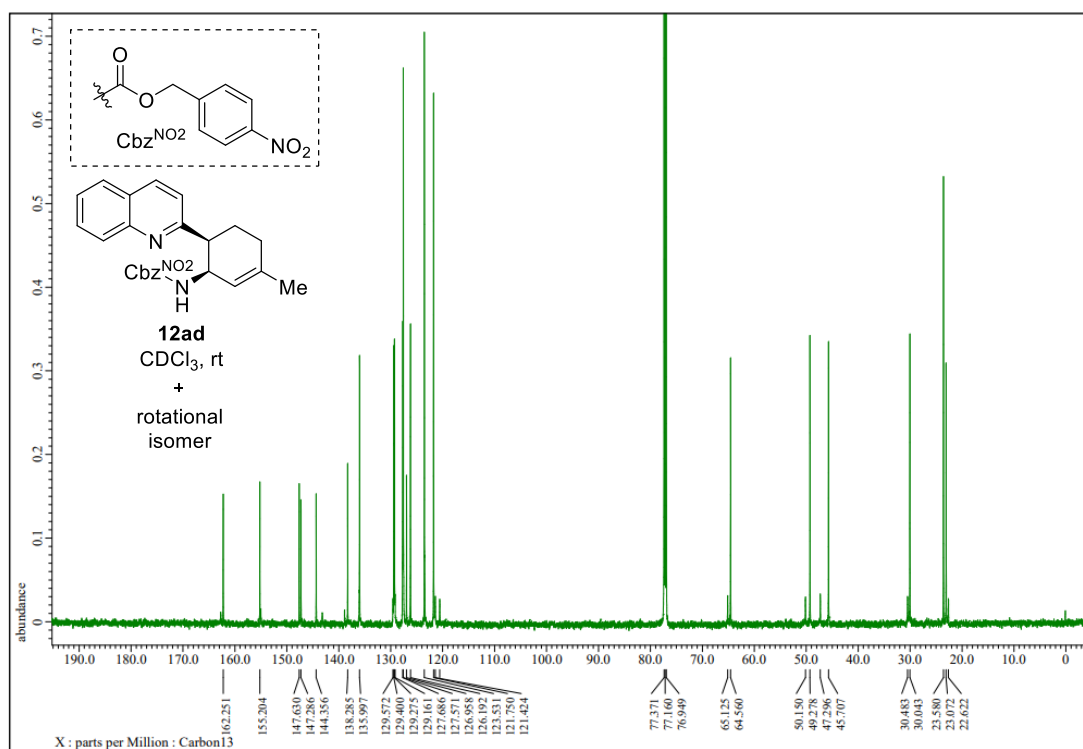



$^1\text{H}$  and  $^{13}\text{C}$  NMR charts of **X2**.

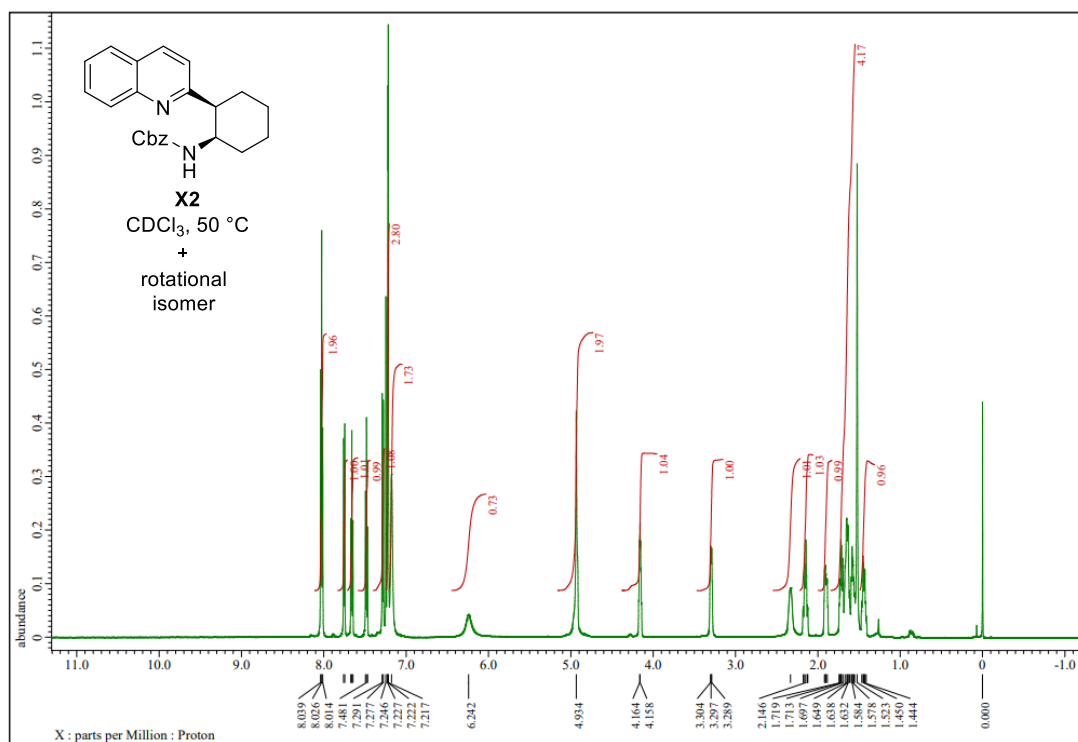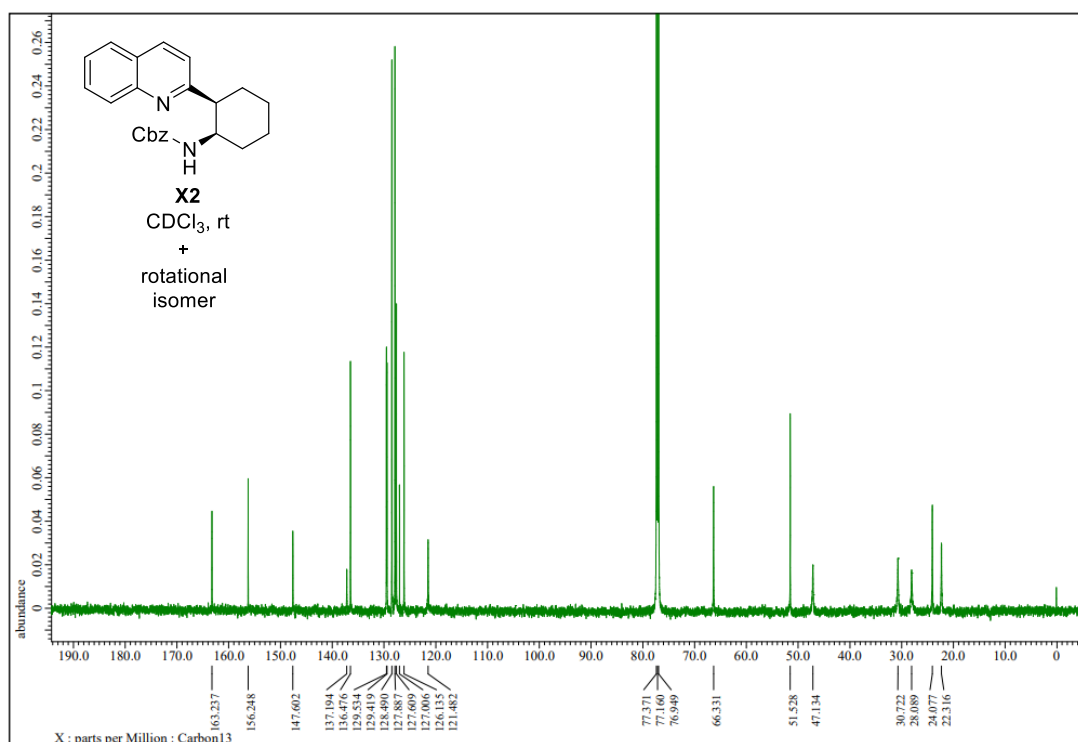

## 10. HPLC chart

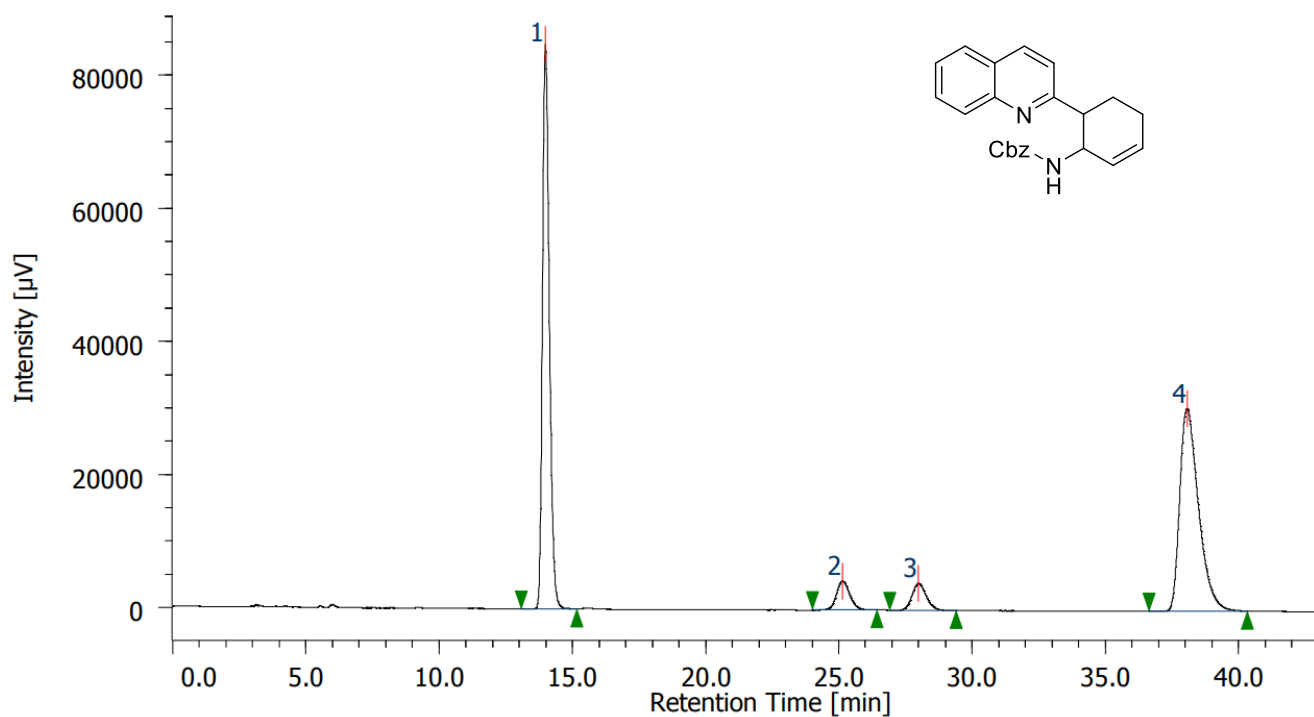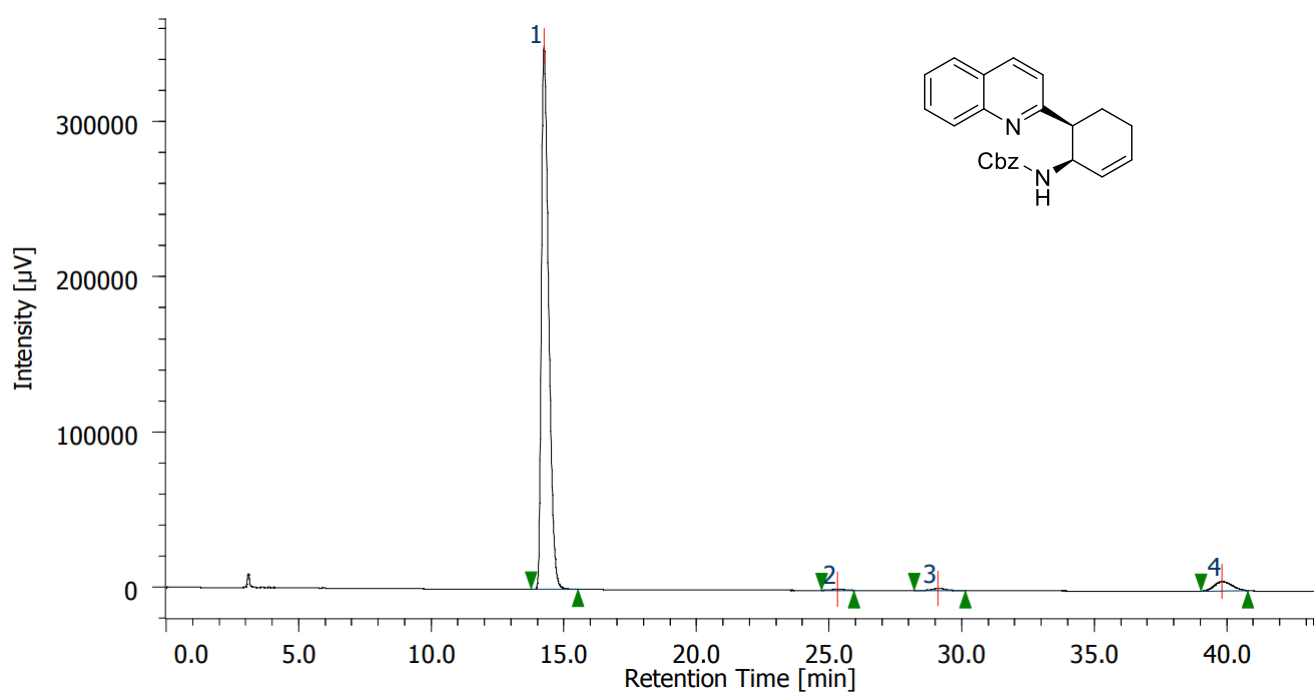

### 3aa

| Peak                 | 1 ( <i>endo</i> ) | 2 ( <i>exo</i> ) | 3 ( <i>exo</i> ) | 4 ( <i>endo</i> ) |
|----------------------|-------------------|------------------|------------------|-------------------|
| Retention Time (min) | 14.2              | 25.3             | 29.1             | 39.8              |
| Area (%)             | 94.8              | 0.4              | 0.8              | 4.0               |

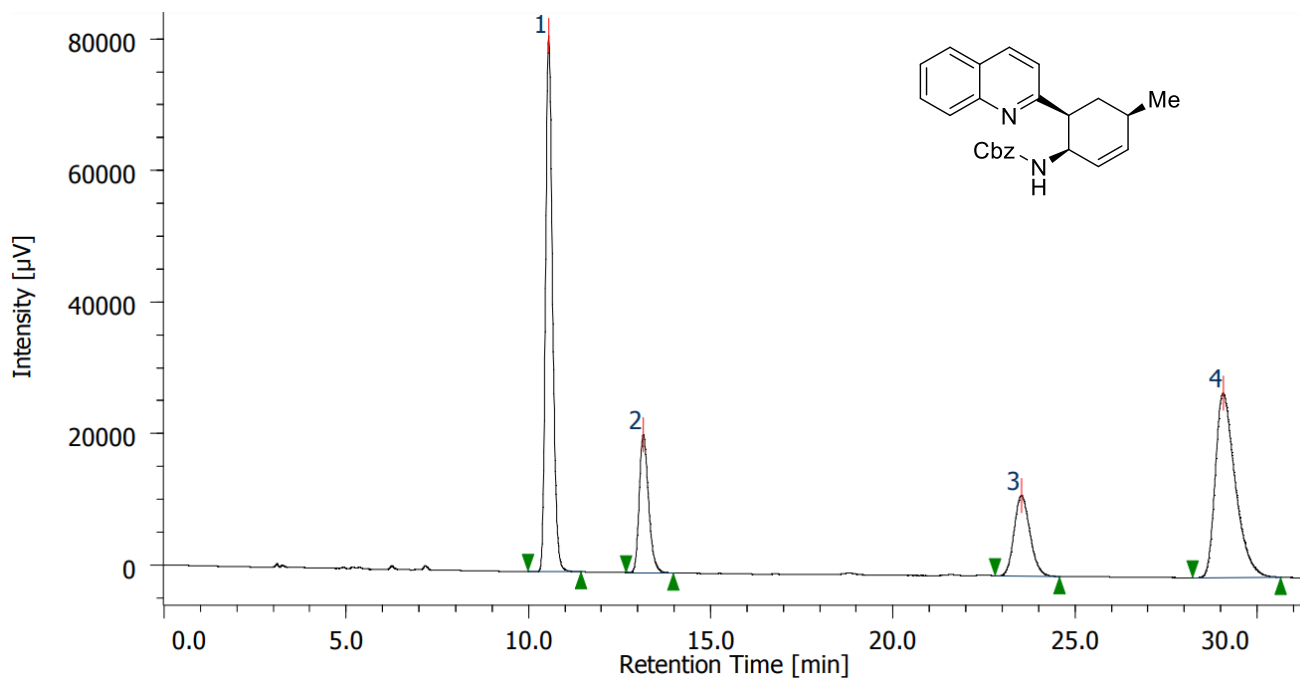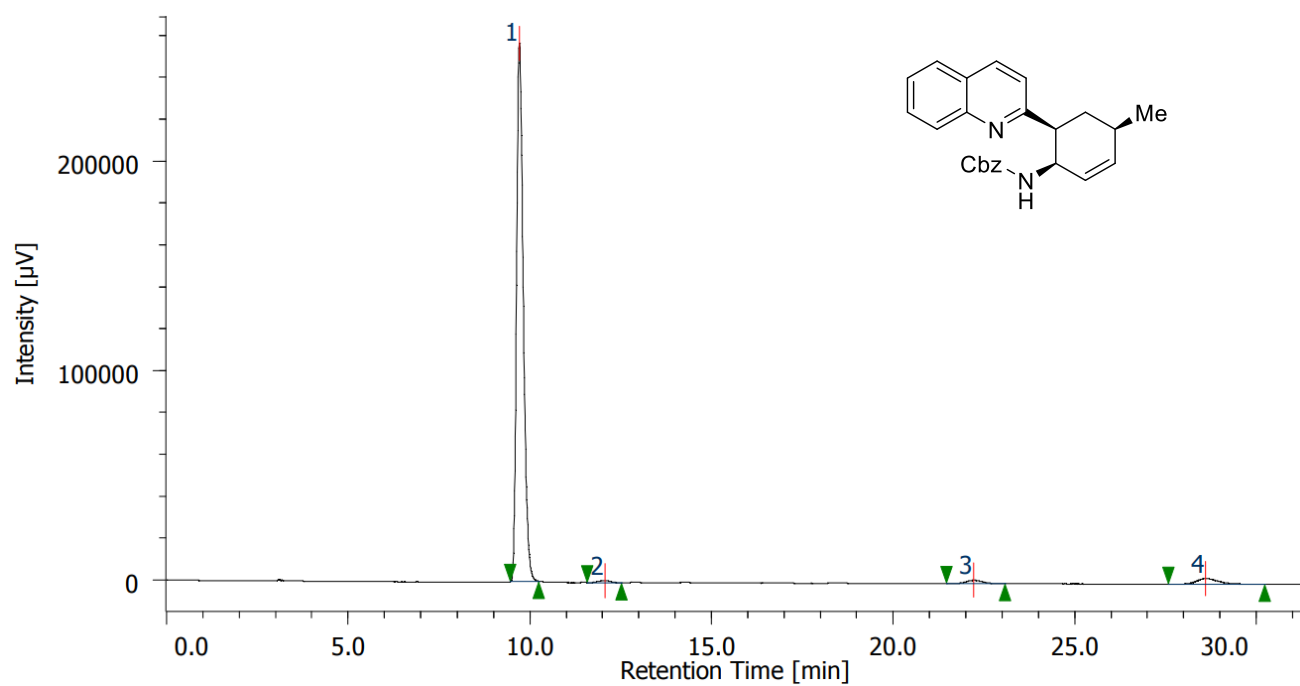

**3ab**

| Peak                 | 1 ( <i>endo</i> ) | 2 ( <i>exo</i> ) | 3 ( <i>exo</i> ) | 4 ( <i>endo</i> ) |
|----------------------|-------------------|------------------|------------------|-------------------|
| Retention Time (min) | 9.7               | 12.1             | 22.2             | 28.6              |
| Area (%)             | 94.1              | 0.6              | 1.1              | 4.2               |

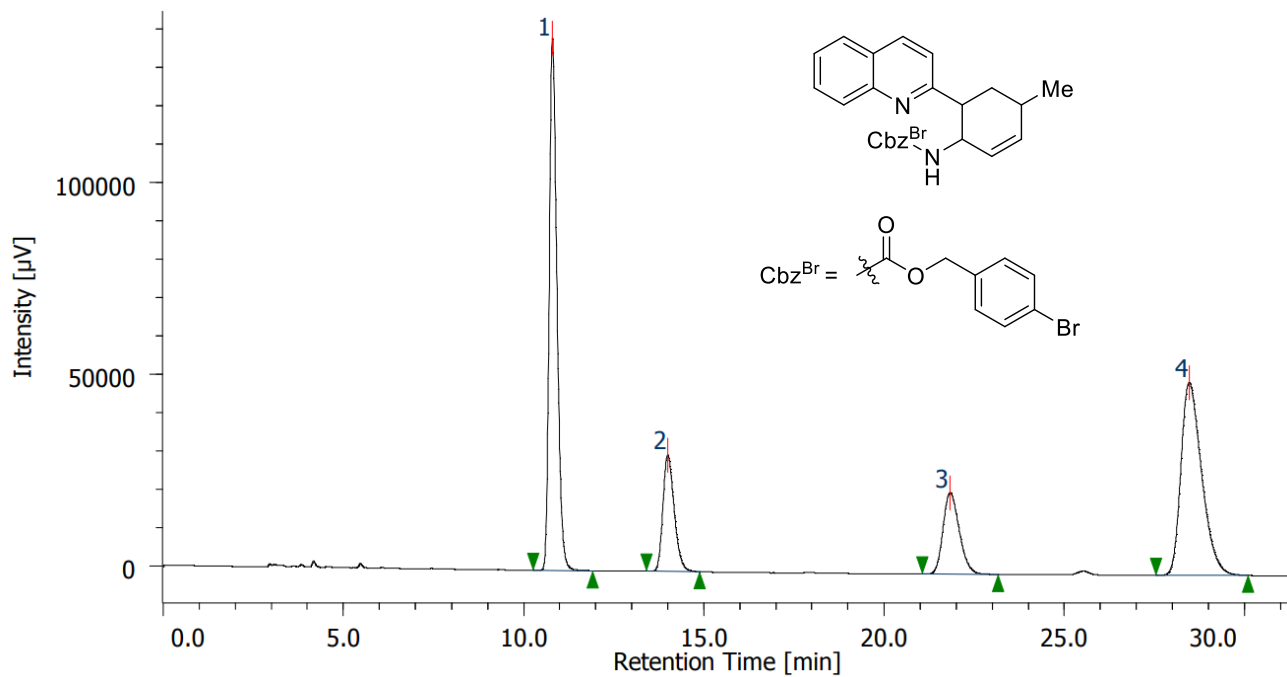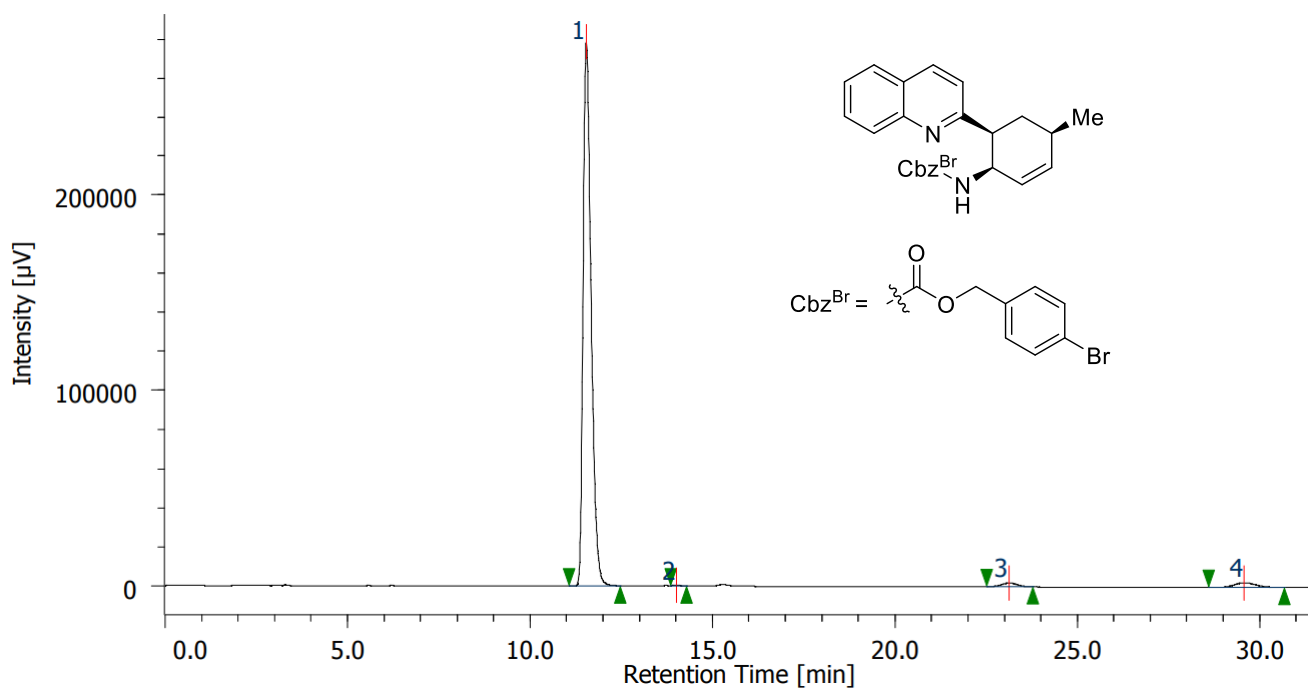

### 11ab

| Peak                 | 1 ( <i>endo</i> ) | 2 ( <i>exo</i> ) | 3 ( <i>exo</i> ) | 4 ( <i>endo</i> ) |
|----------------------|-------------------|------------------|------------------|-------------------|
| Retention Time (min) | 11.5              | 14.0             | 23.1             | 29.6              |
| Area (%)             | 96.3              | 0.1              | 1.4              | 2.2               |

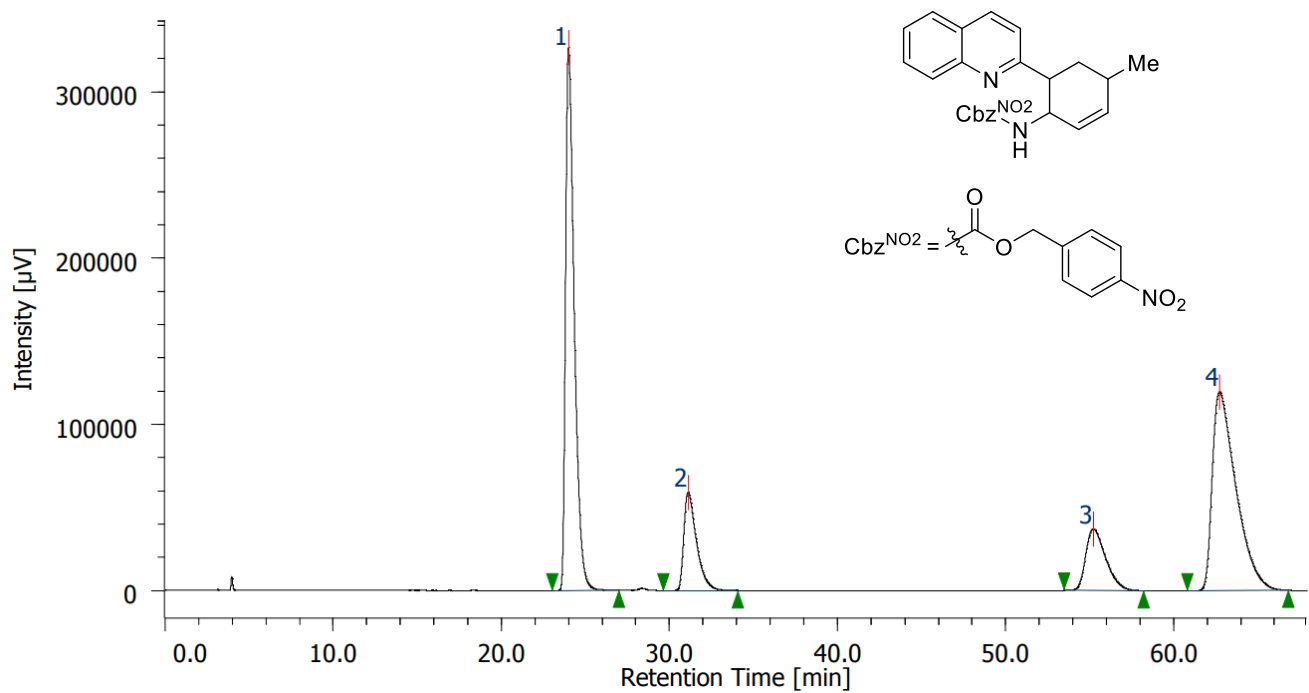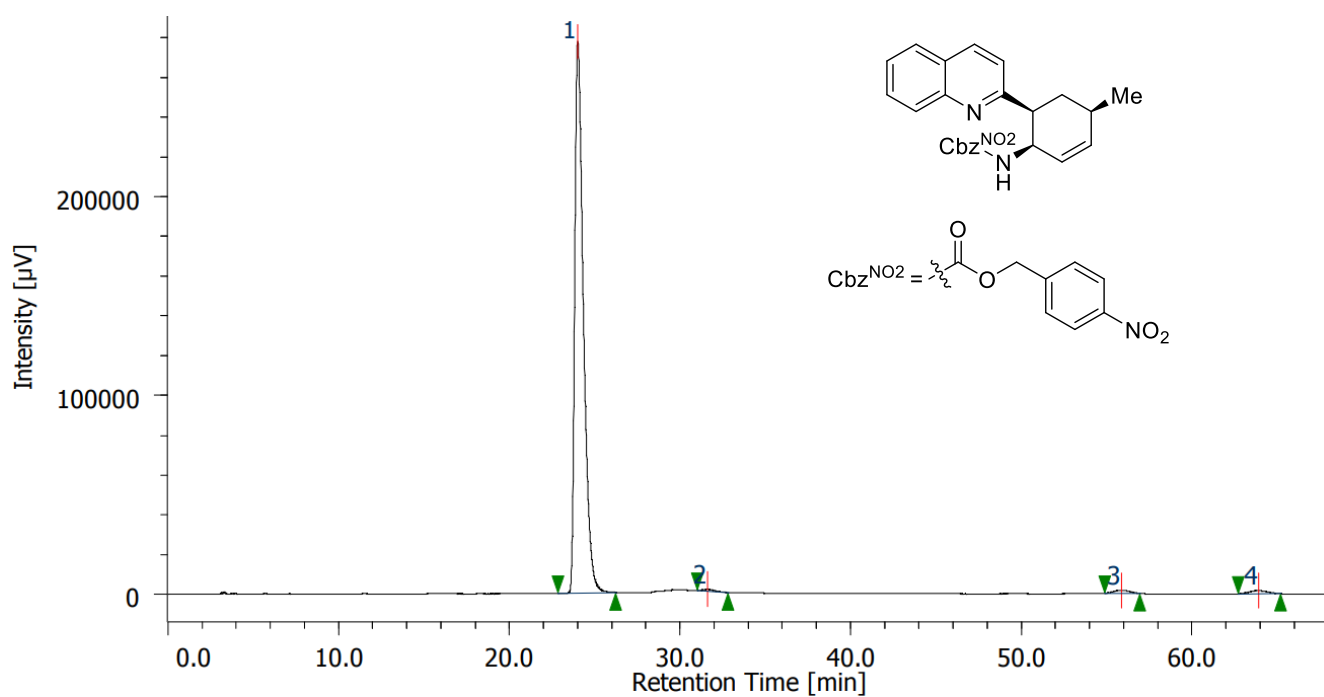

### 12ab

| Peak                 | 1 ( <i>endo</i> ) | 2 ( <i>exo</i> ) | 3 ( <i>exo</i> ) | 4 ( <i>endo</i> ) |
|----------------------|-------------------|------------------|------------------|-------------------|
| Retention Time (min) | 24.0              | 31.6             | 55.9             | 63.9              |
| Area (%)             | 97.3              | 0.4              | 1.0              | 1.2               |

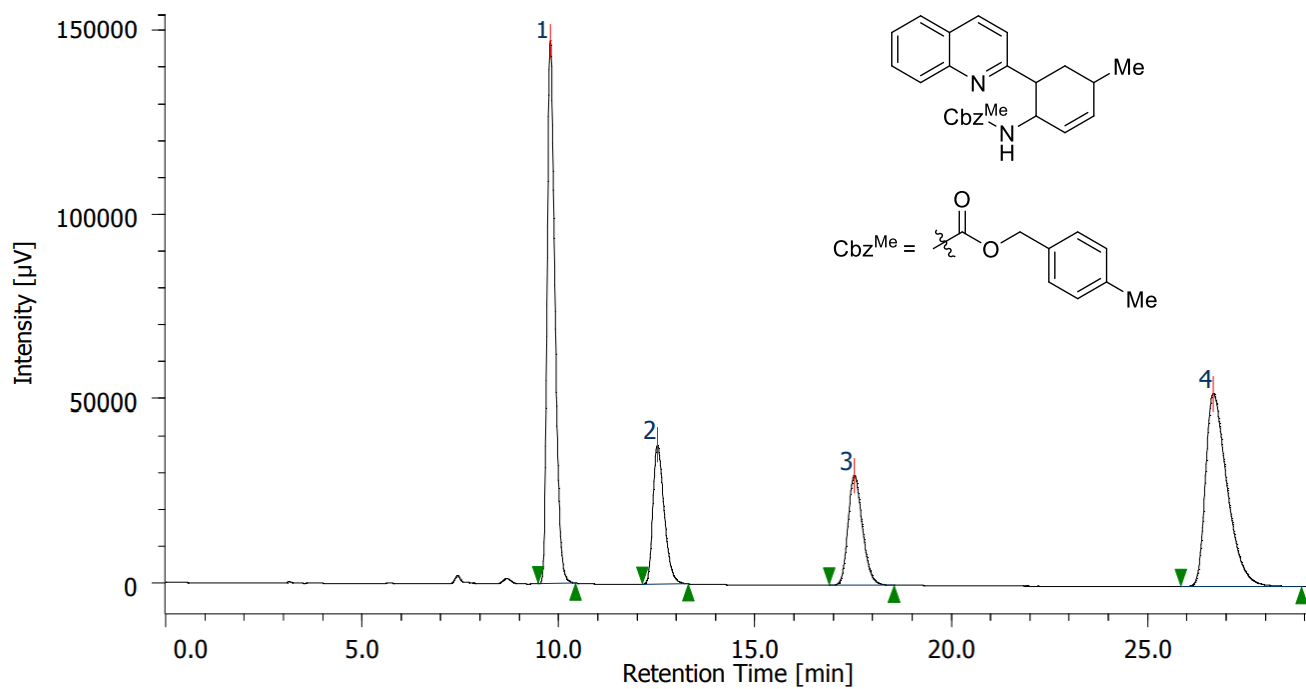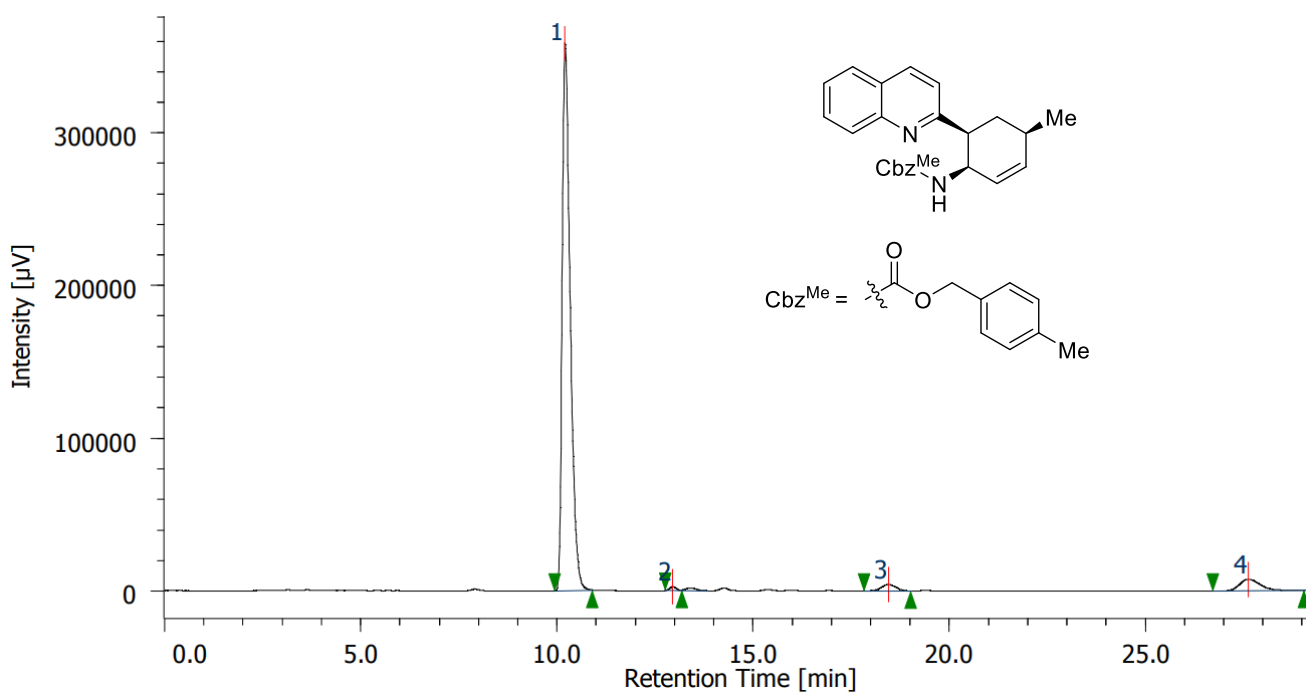

13ab

| Peak                 | 1 ( <i>endo</i> ) | 2 ( <i>exo</i> ) | 3 ( <i>exo</i> ) | 4 ( <i>endo</i> ) |
|----------------------|-------------------|------------------|------------------|-------------------|
| Retention Time (min) | 10.2              | 12.9             | 18.5             | 27.6              |
| Area (%)             | 92.6              | 0.6              | 1.9              | 4.9               |

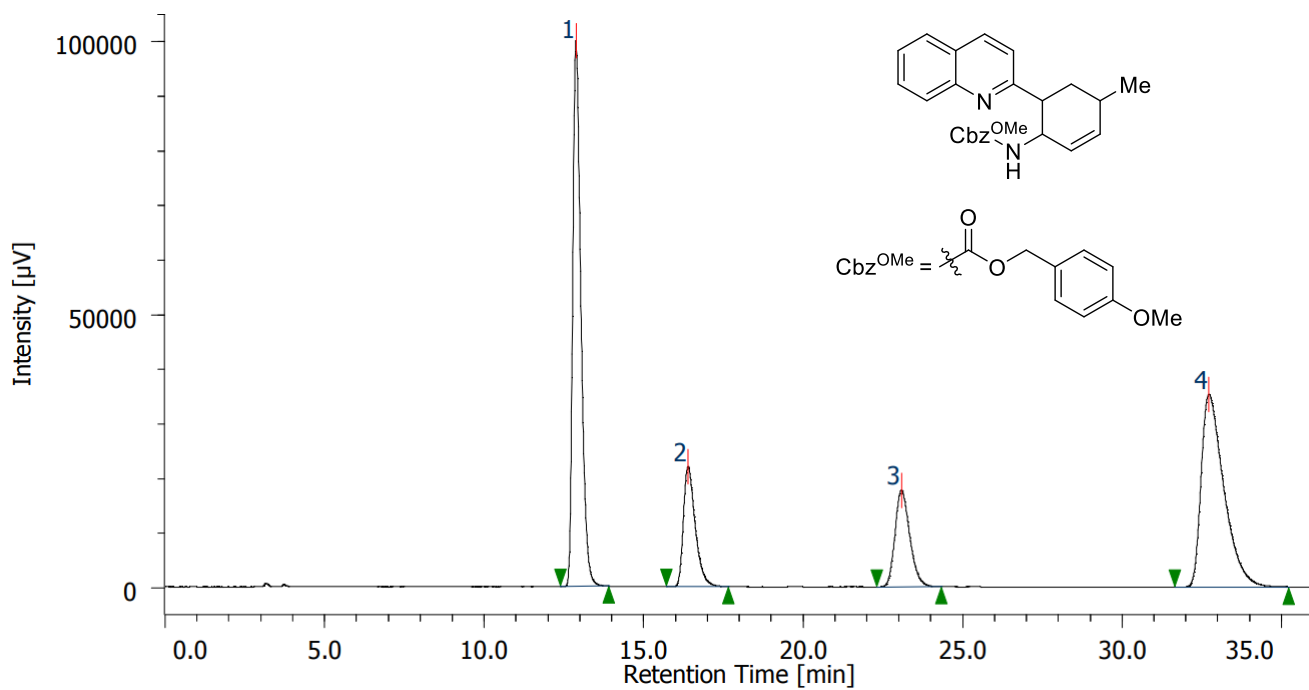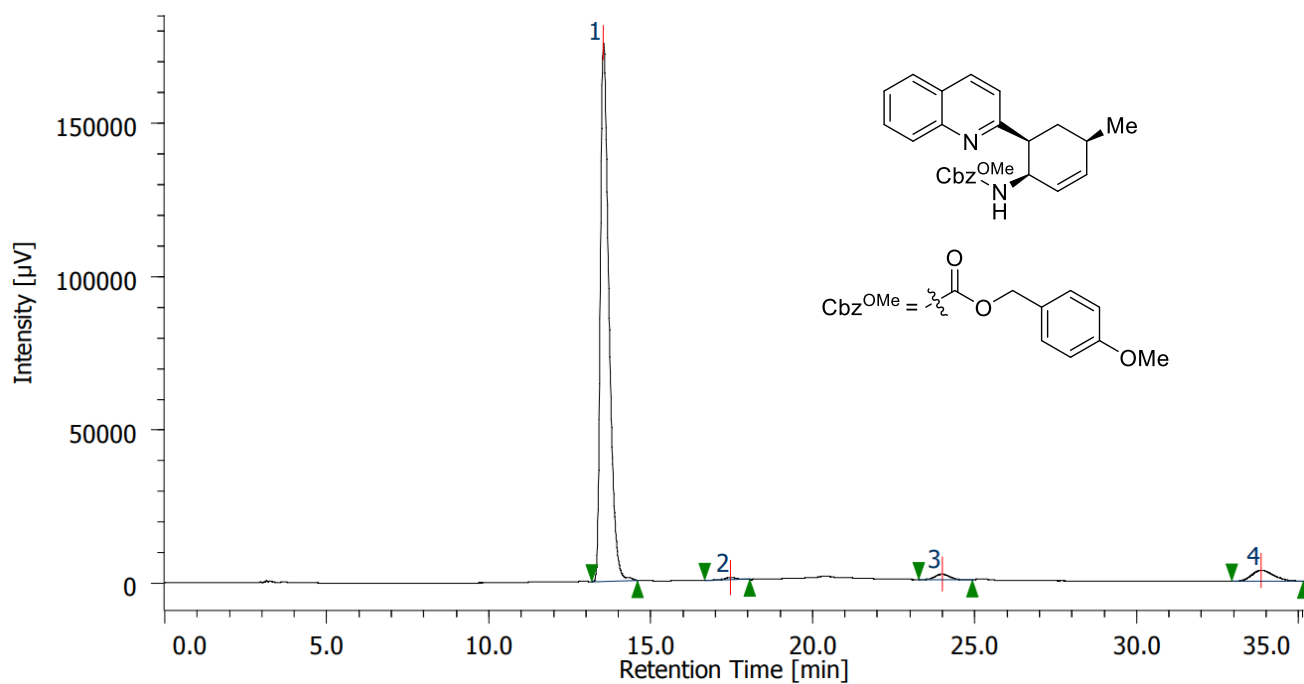

14ab

| Peak                 | 1 ( <i>endo</i> ) | 2 ( <i>exo</i> ) | 3 ( <i>exo</i> ) | 4 ( <i>endo</i> ) |
|----------------------|-------------------|------------------|------------------|-------------------|
| Retention Time (min) | 13.5              | 17.5             | 24.0             | 33.8              |
| Area (%)             | 92.9              | 0.6              | 1.6              | 4.9               |

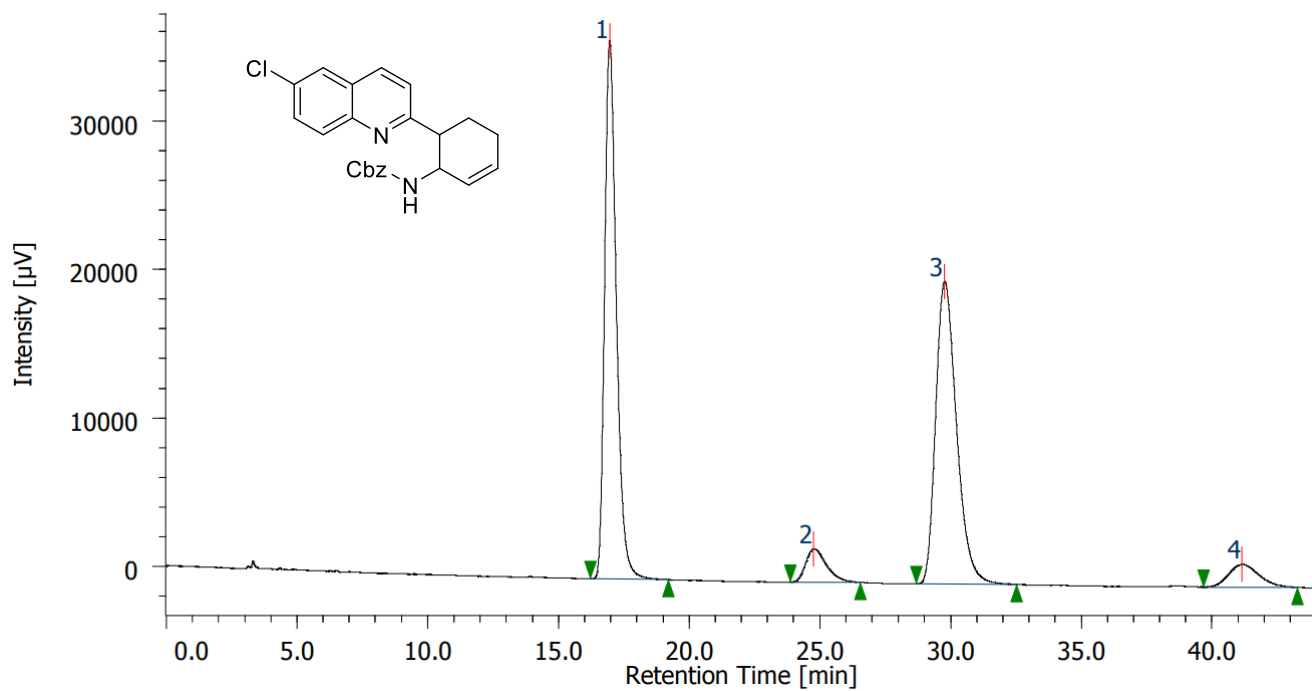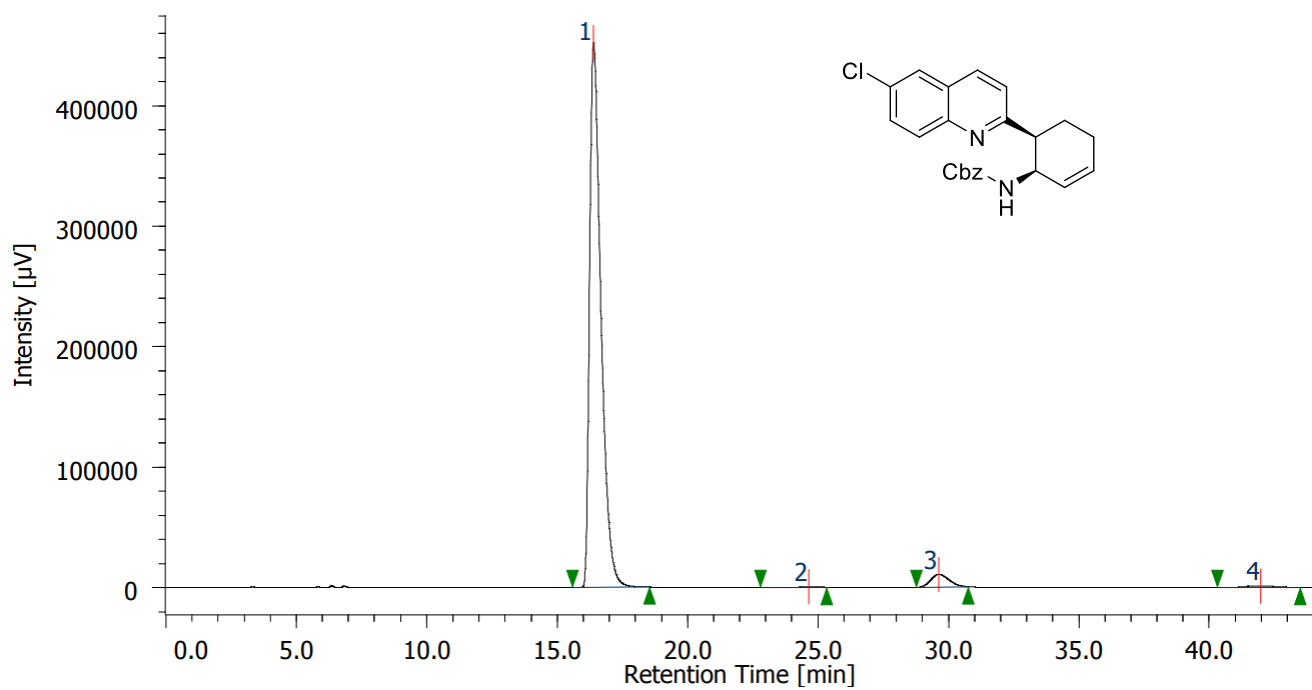

### 3ba

| Peak                 | 1 ( <i>endo</i> ) | 2 ( <i>exo</i> ) | 3 ( <i>endo</i> ) | 4 ( <i>exo</i> ) |
|----------------------|-------------------|------------------|-------------------|------------------|
| Retention Time (min) | 16.4              | 24.6             | 29.6              | 42.0             |
| Area (%)             | 95.4              | 0.2              | 3.7               | 0.8              |



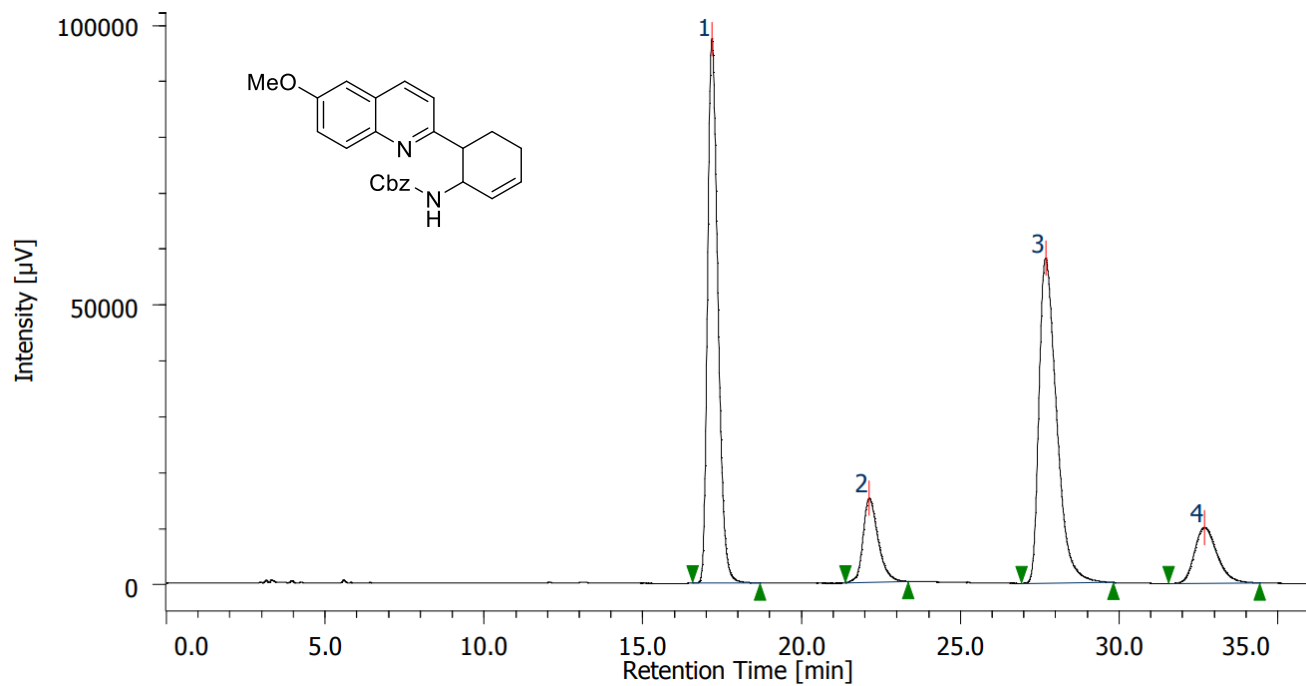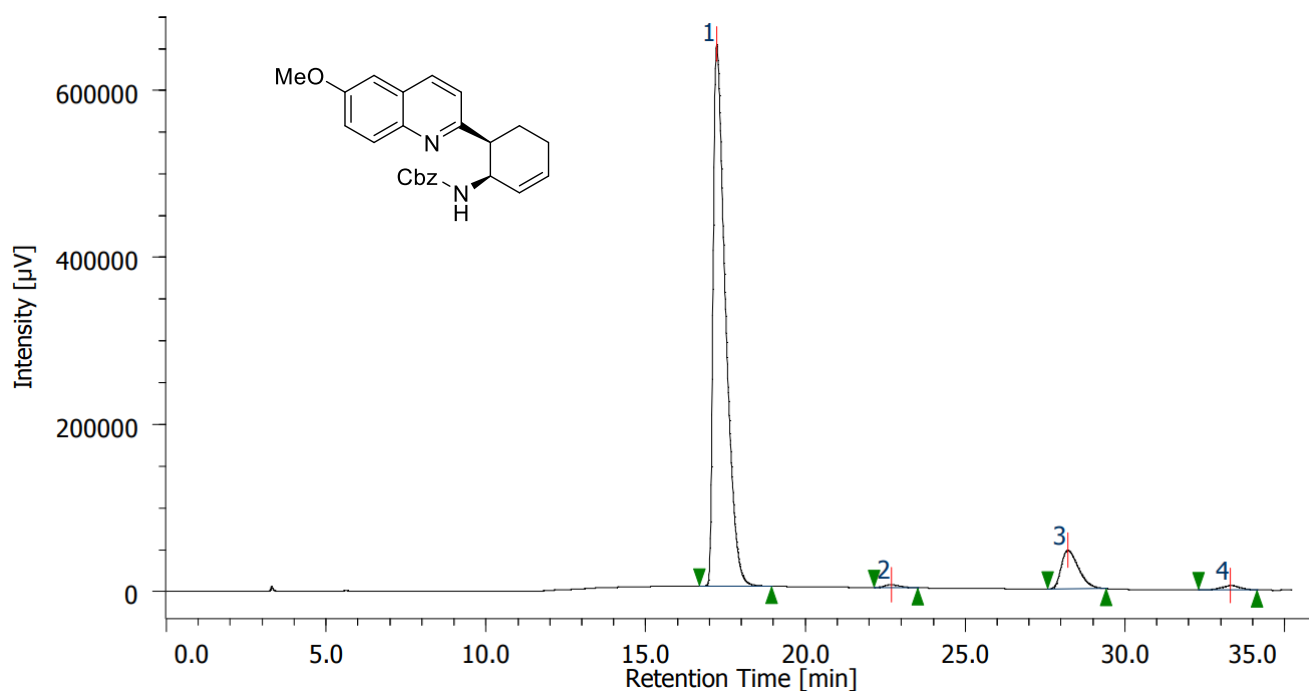

### 3ca

| Peak                 | 1 ( <i>endo</i> ) | 2 ( <i>exo</i> ) | 3 ( <i>endo</i> ) | 4 ( <i>exo</i> ) |
|----------------------|-------------------|------------------|-------------------|------------------|
| Retention Time (min) | 17.2              | 22.7             | 28.2              | 33.3             |
| Area (%)             | 89.4              | 0.6              | 9.0               | 1.0              |

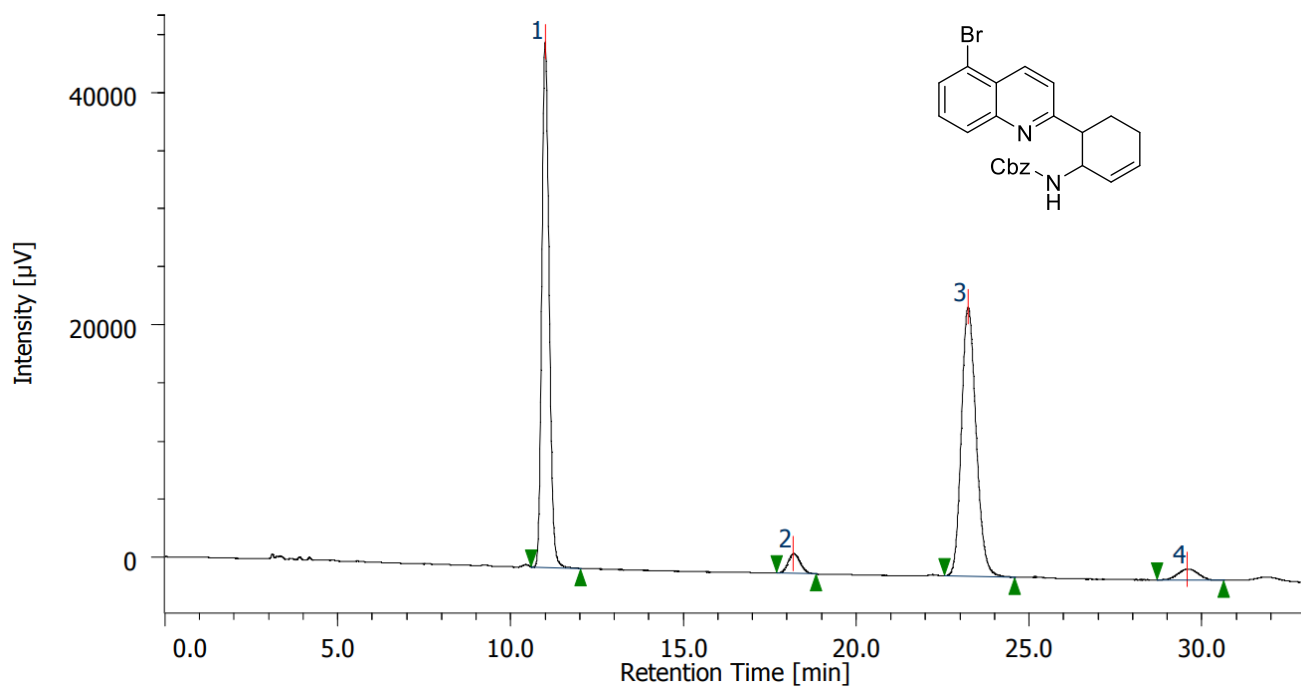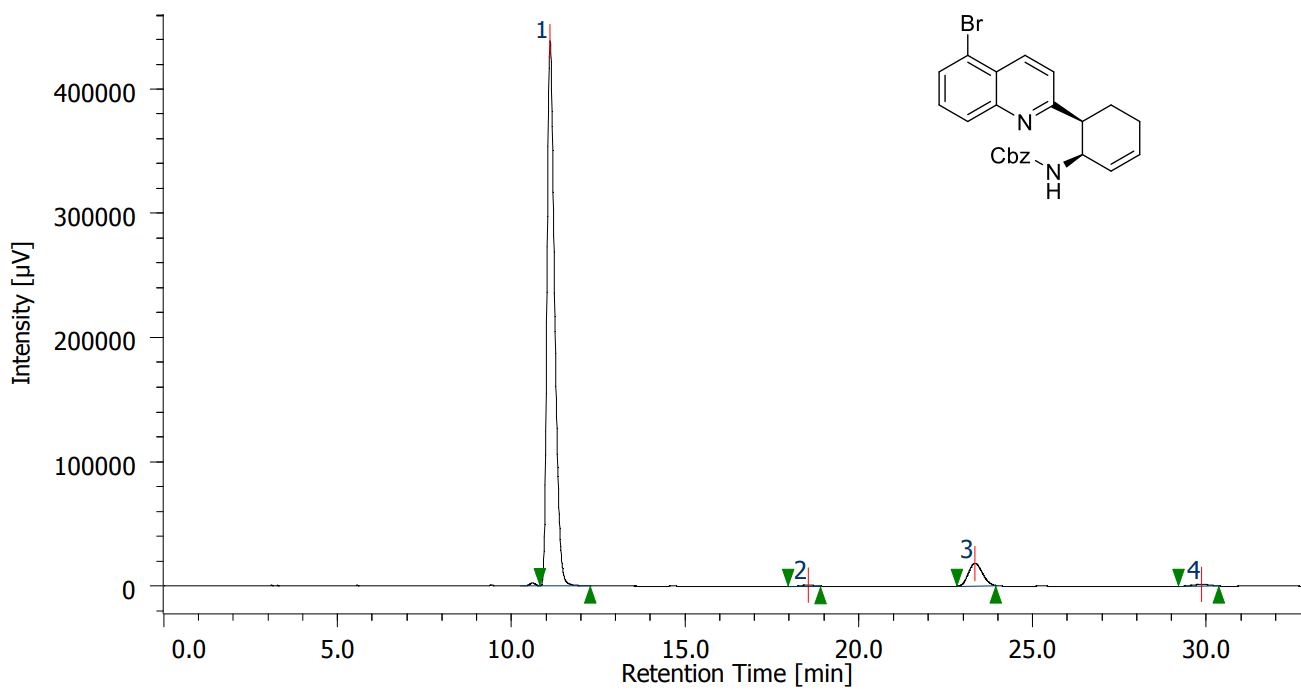

### 3da

| Peak                 | 1 ( <i>endo</i> ) | 2 ( <i>exo</i> ) | 3 ( <i>endo</i> ) | 4 ( <i>exo</i> ) |
|----------------------|-------------------|------------------|-------------------|------------------|
| Retention Time (min) | 11.1              | 18.5             | 23.3              | 29.8             |
| Area (%)             | 91.9              | 0.3              | 7.1               | 0.7              |

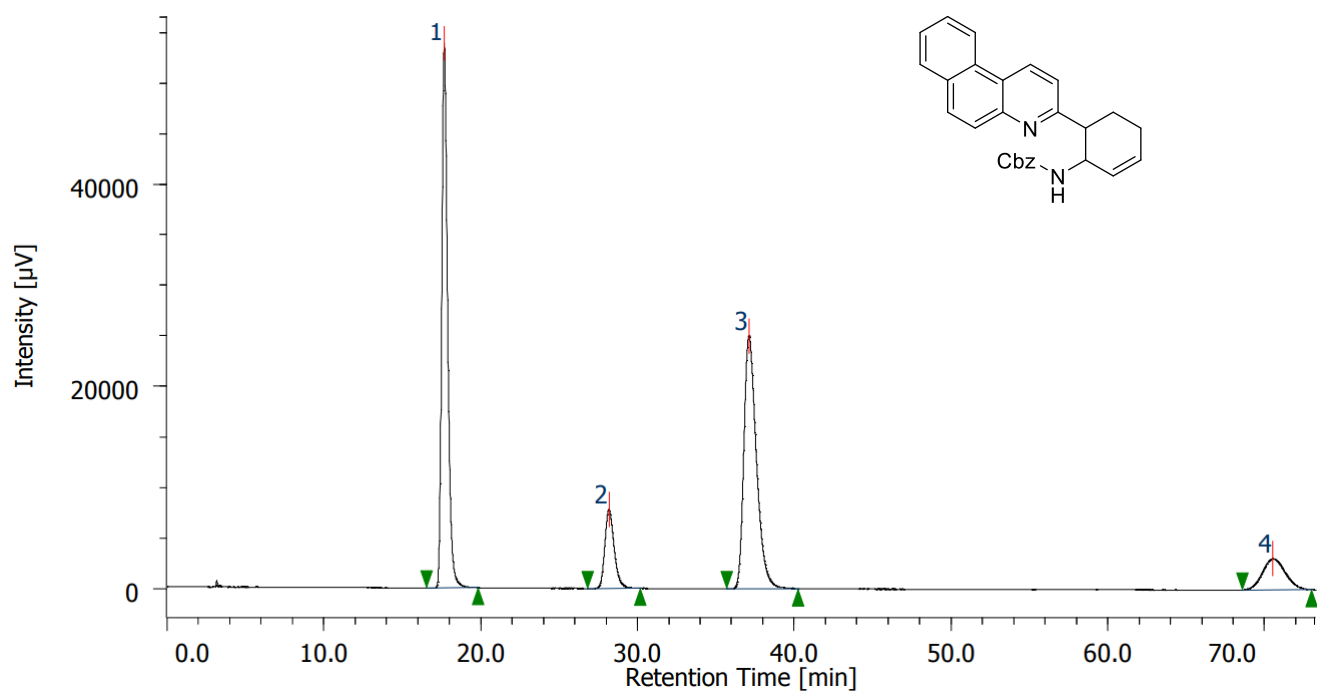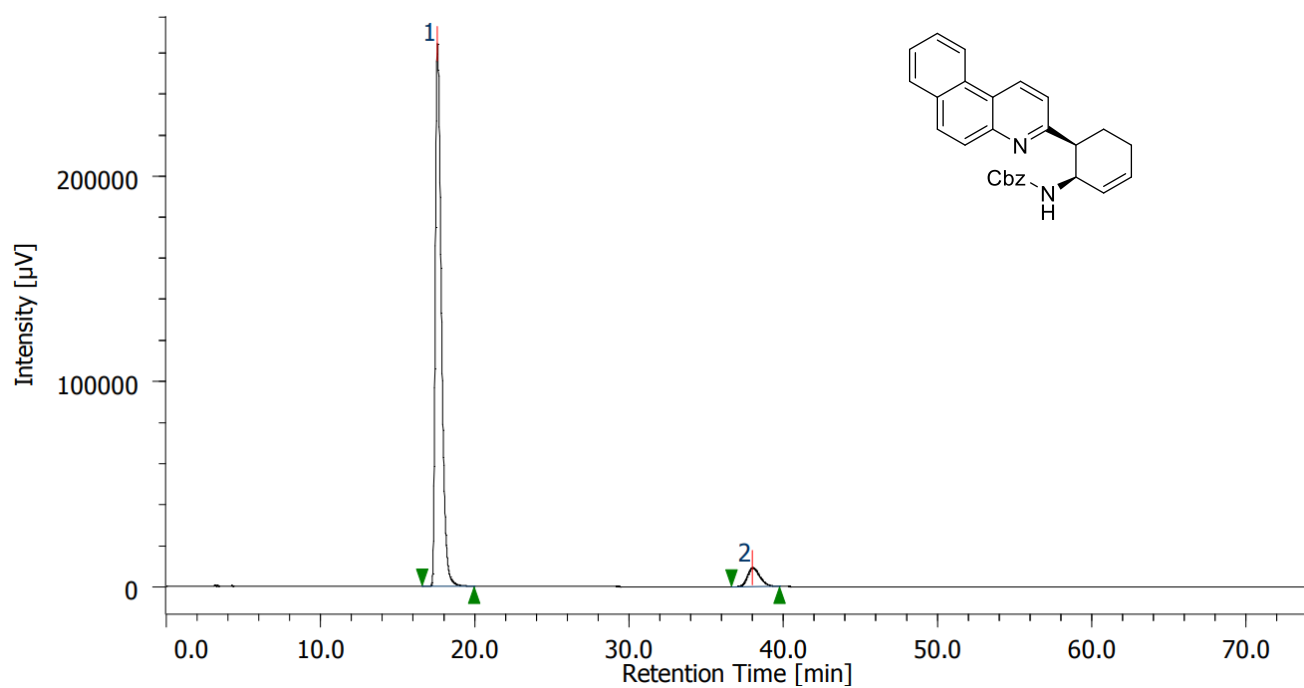

**3ea**

| Peak                 | 1 ( <i>endo</i> ) | 2 ( <i>exo</i> ) | 3(2) ( <i>endo</i> ) | 4 ( <i>exo</i> ) |
|----------------------|-------------------|------------------|----------------------|------------------|
| Retention Time (min) | 17.7              | 28.2             | 37.1                 | 70.5             |
| Area (%)             | 93.1              | -                | 6.9                  | -                |

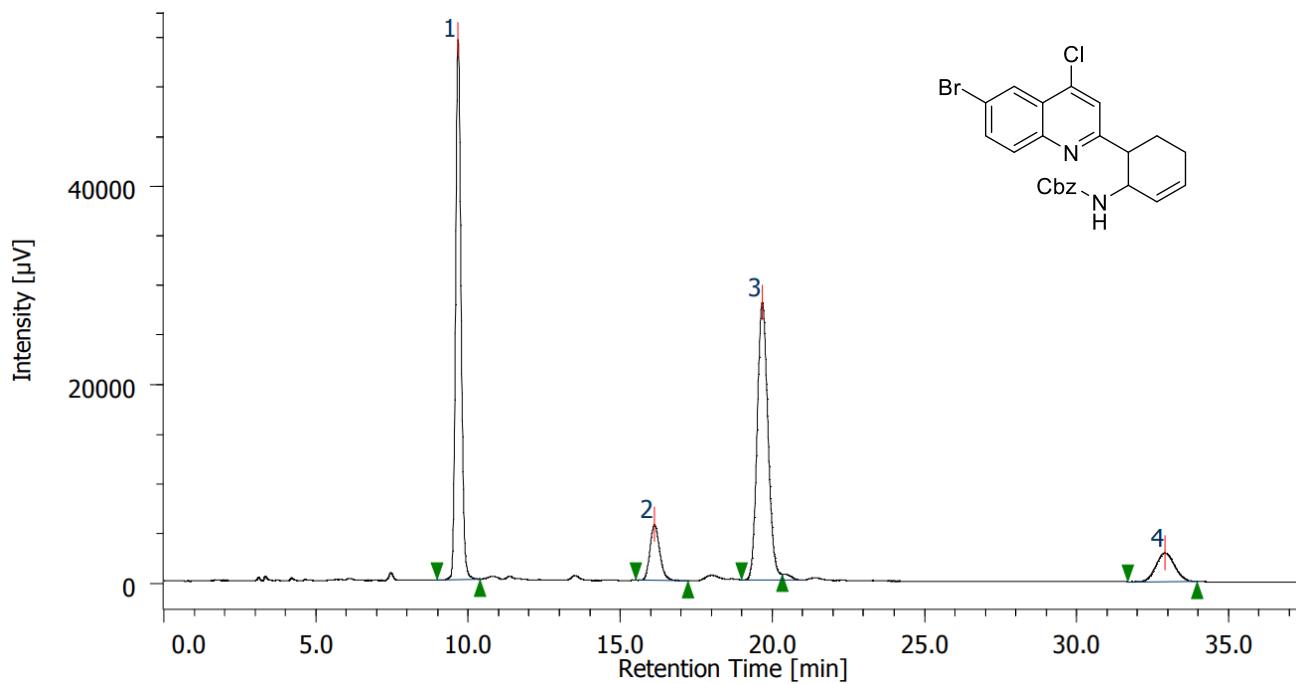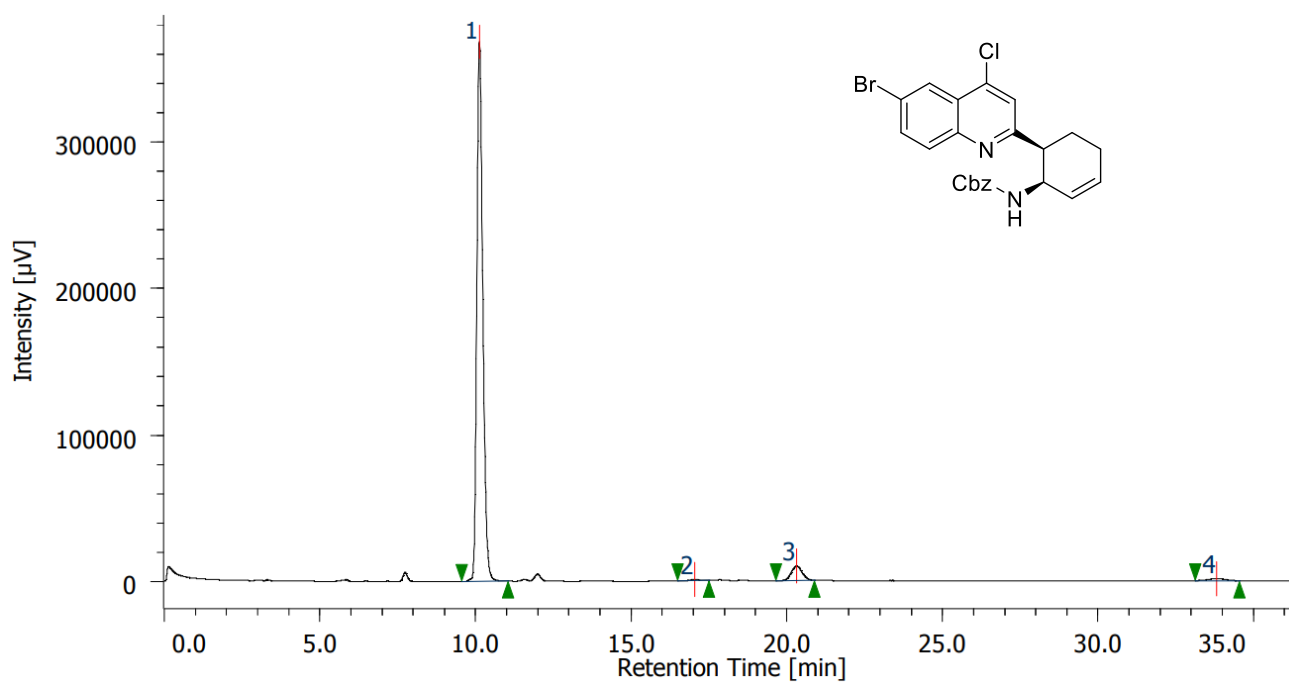

3fa

| Peak                 | 1 ( <i>endo</i> ) | 2 ( <i>exo</i> ) | 3 ( <i>endo</i> ) | 4 ( <i>exo</i> ) |
|----------------------|-------------------|------------------|-------------------|------------------|
| Retention Time (min) | 10.1              | 17.0             | 20.3              | 33.8             |
| Area (%)             | 94.1              | 0.4              | 4.5               | 1.0              |

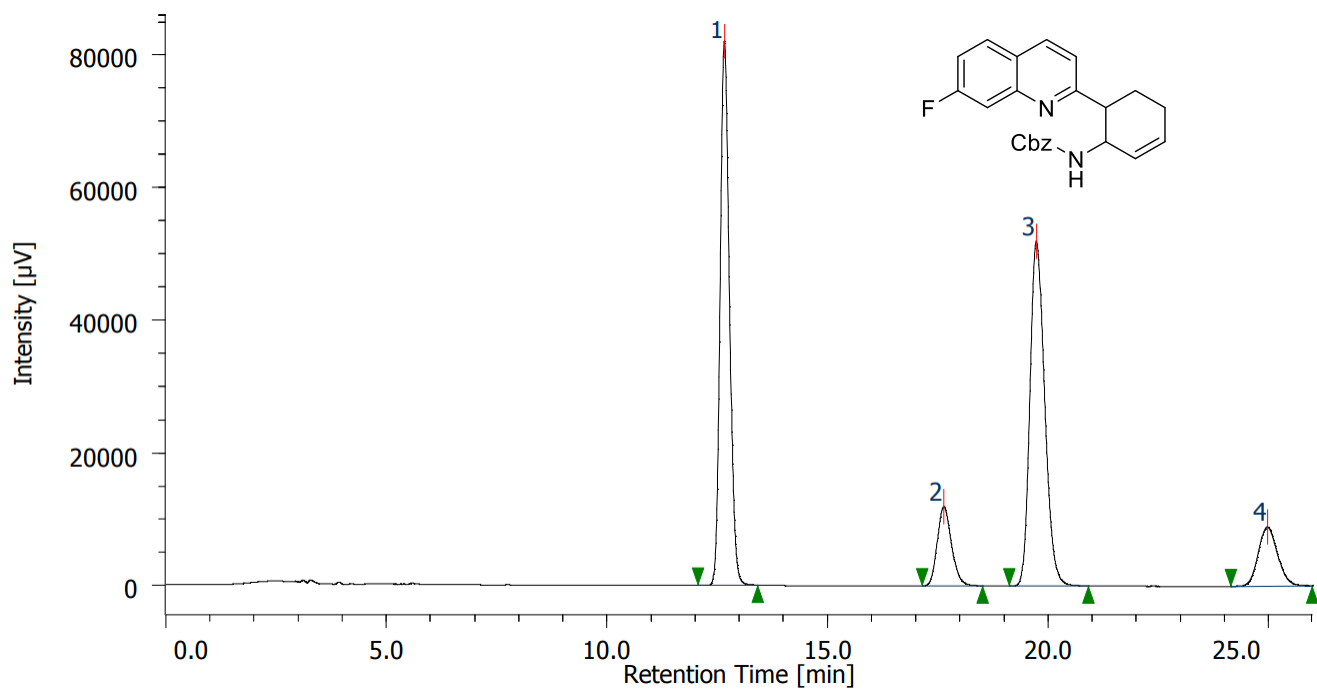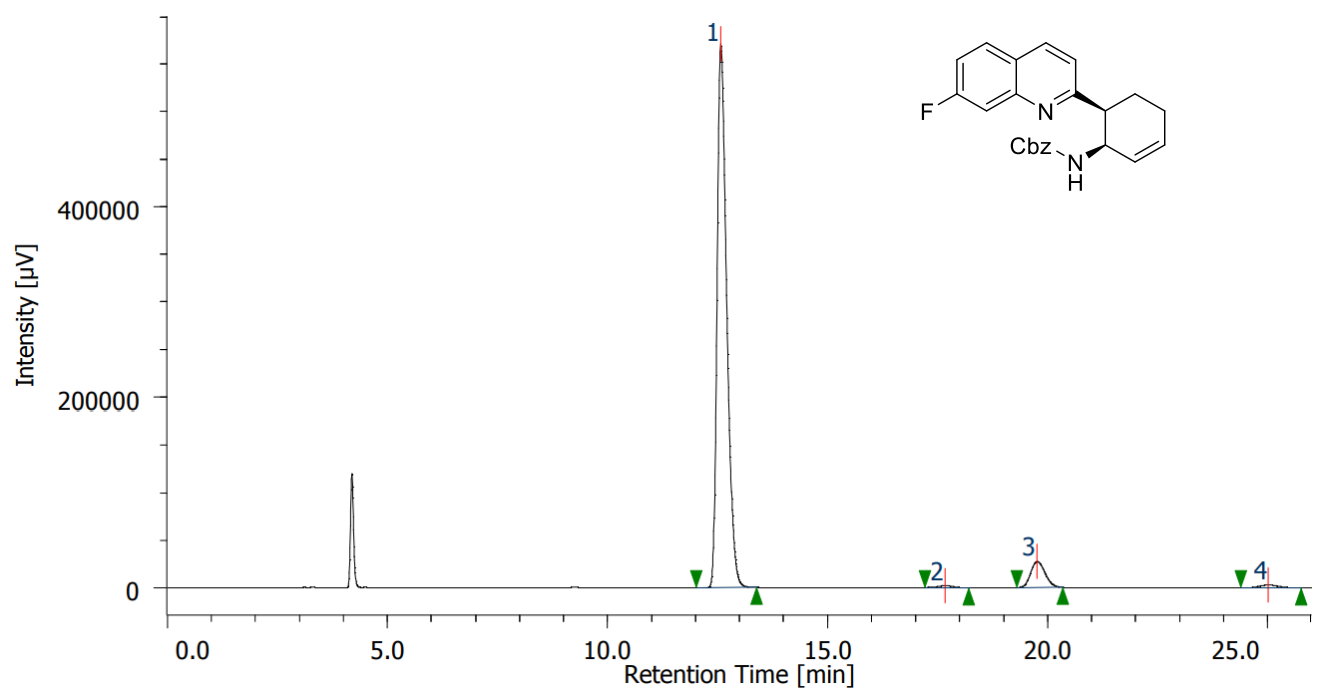

### 3ga

| Peak                 | 1 ( <i>endo</i> ) | 2 ( <i>exo</i> ) | 3 ( <i>endo</i> ) | 4 ( <i>exo</i> ) |
|----------------------|-------------------|------------------|-------------------|------------------|
| Retention Time (min) | 12.6              | 17.7             | 19.8              | 25.0             |
| Area (%)             | 91.9              | 0.5              | 6.6               | 1.0              |

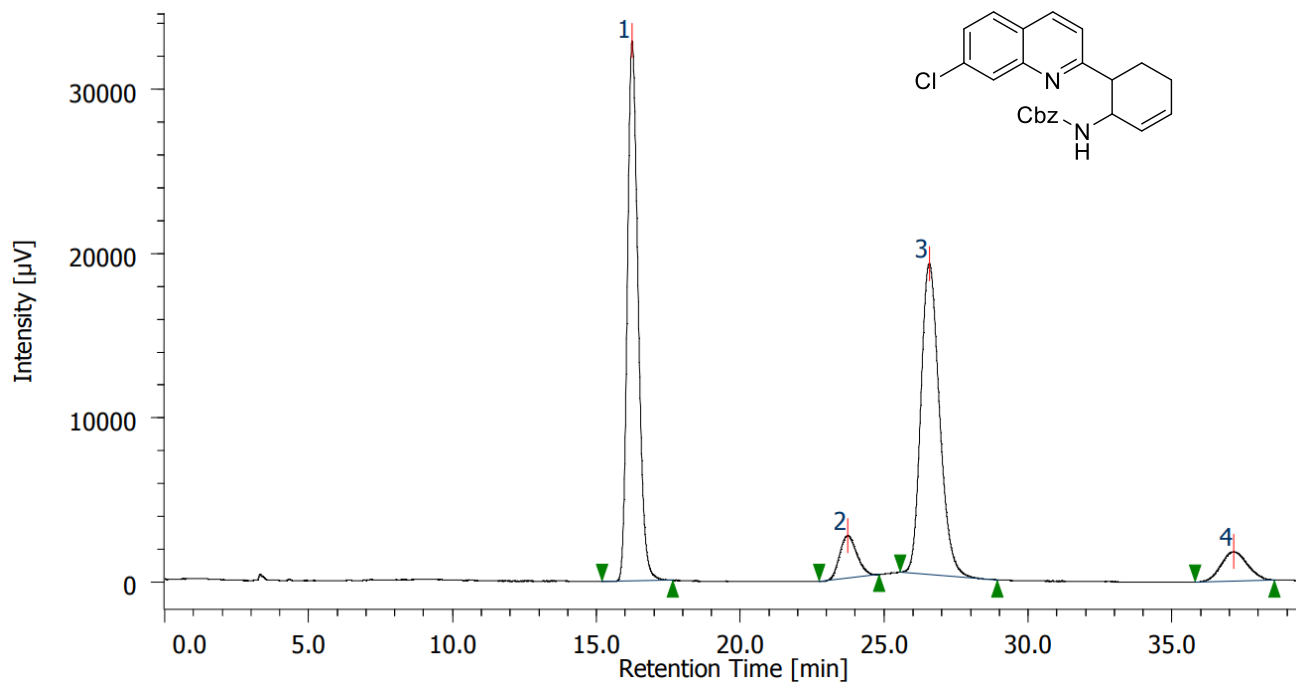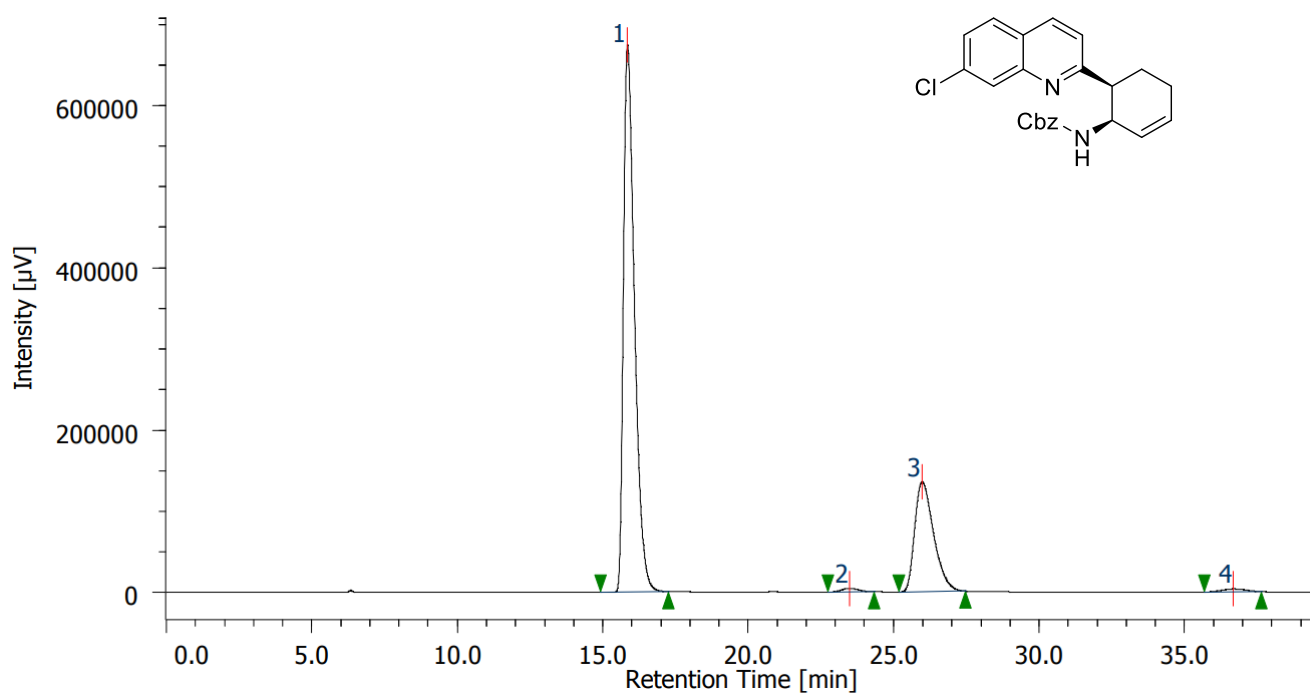

### 3ha

| Peak                 | 1 ( <i>endo</i> ) | 2 ( <i>exo</i> ) | 3 ( <i>endo</i> ) | 4 ( <i>exo</i> ) |
|----------------------|-------------------|------------------|-------------------|------------------|
| Retention Time (min) | 15.8              | 23.5             | 26.0              | 36.7             |
| Area (%)             | 73.2              | 0.7              | 25.2              | 0.8              |

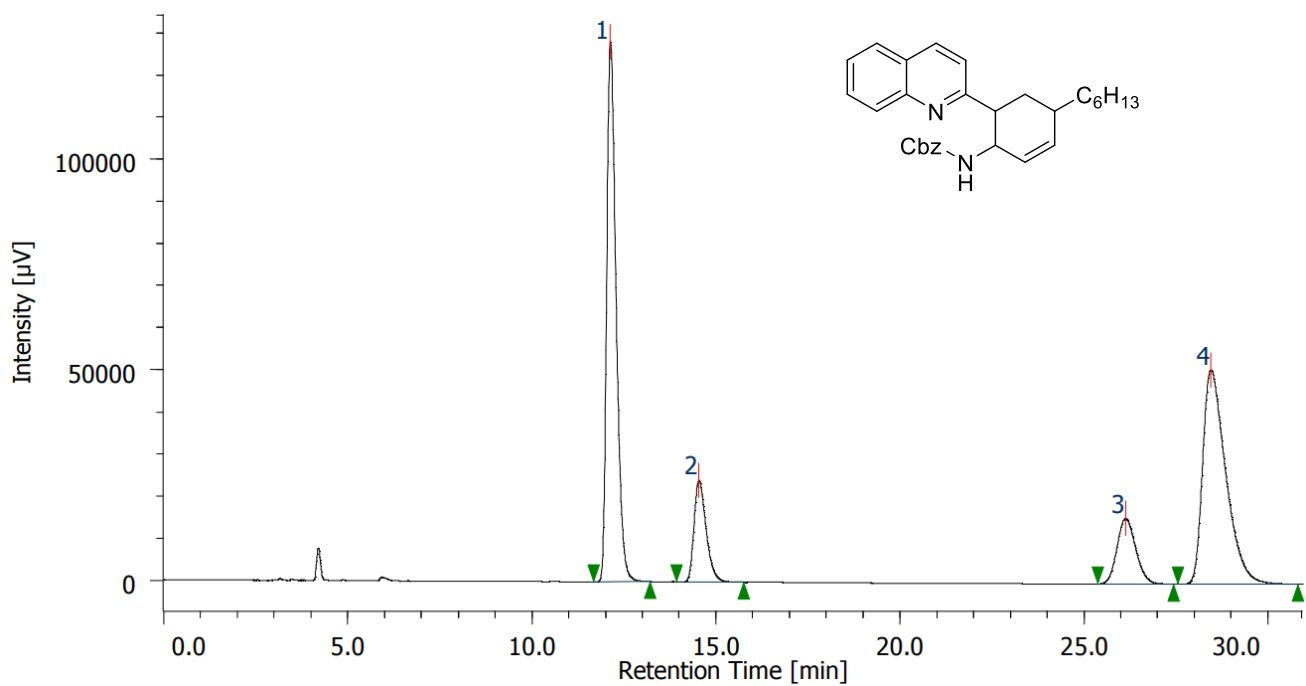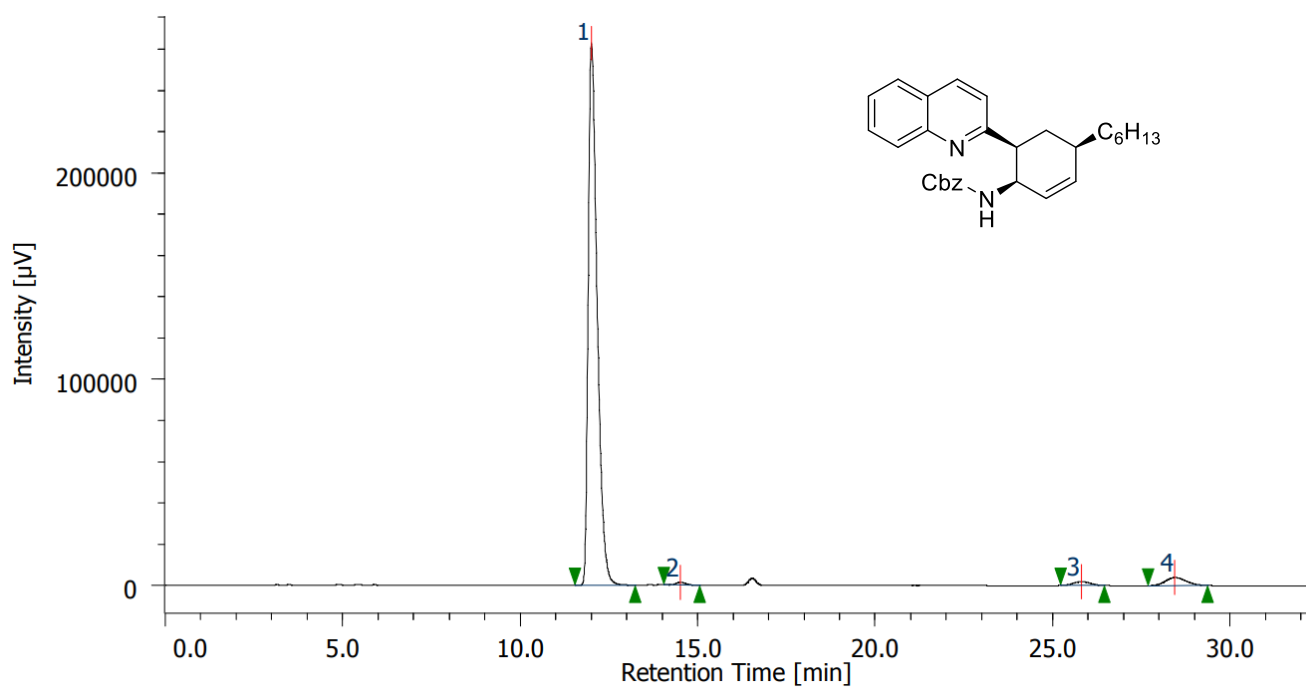

### 3ac

| Peak                 | 1 ( <i>endo</i> ) | 2 ( <i>exo</i> ) | 3 ( <i>exo</i> ) | 4 ( <i>endo</i> ) |
|----------------------|-------------------|------------------|------------------|-------------------|
| Retention Time (min) | 12.0              | 14.5             | 25.8             | 28.4              |
| Area (%)             | 94.9              | 0.5              | 1.3              | 3.3               |

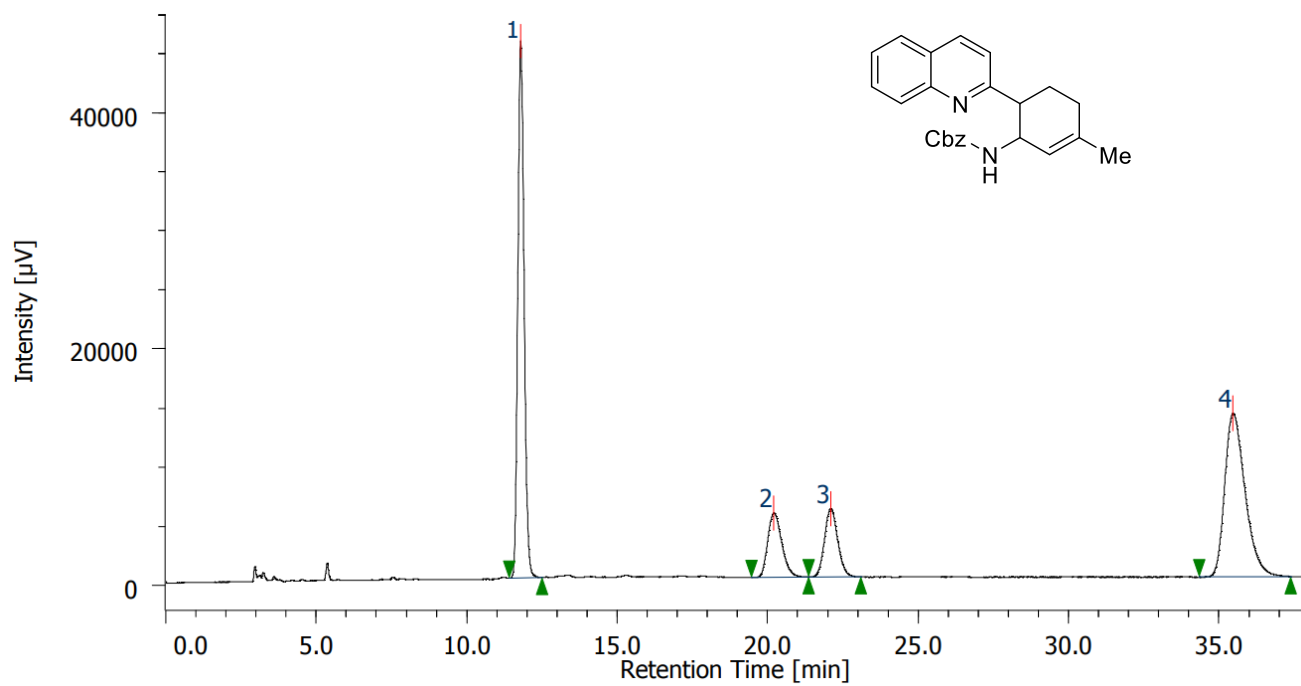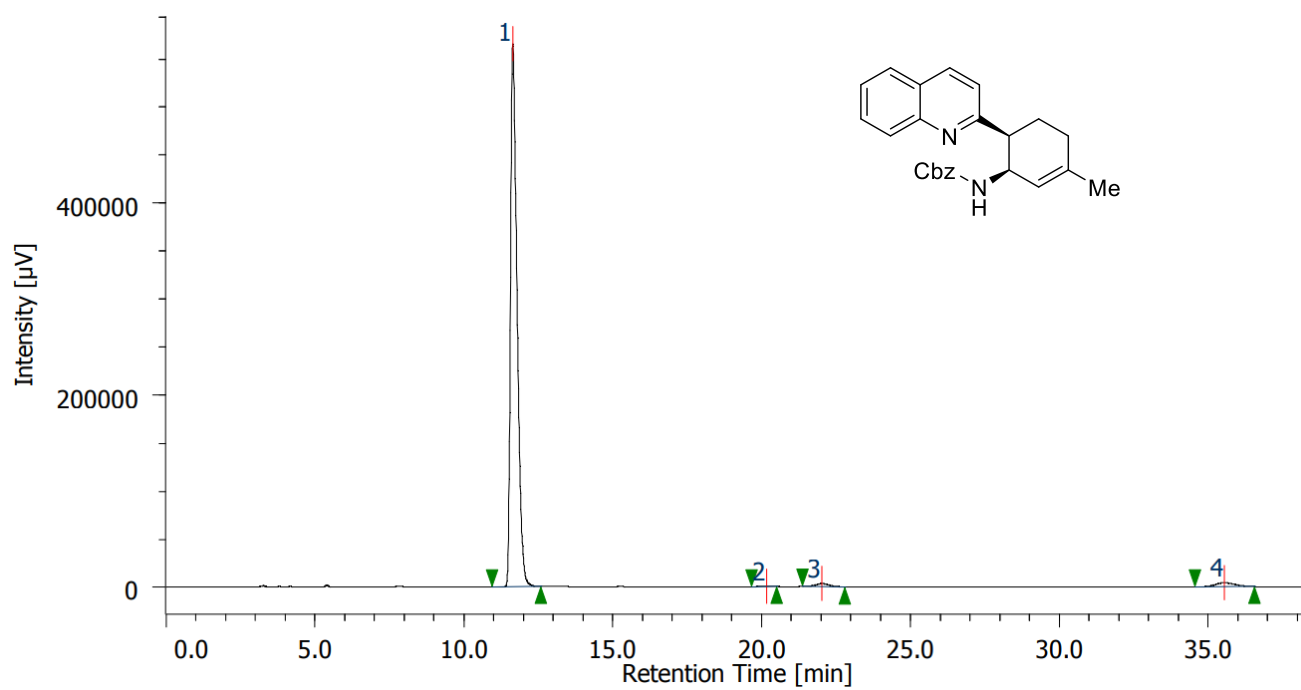

### 3ad

| Peak                 | 1 ( <i>endo</i> ) | 2 ( <i>exo</i> ) | 3 ( <i>exo</i> ) | 4 ( <i>endo</i> ) |
|----------------------|-------------------|------------------|------------------|-------------------|
| Retention Time (min) | 11.6              | 20.2             | 22.0             | 35.5              |
| Area (%)             | 96.6              | 0.2              | 1.1              | 2.1               |



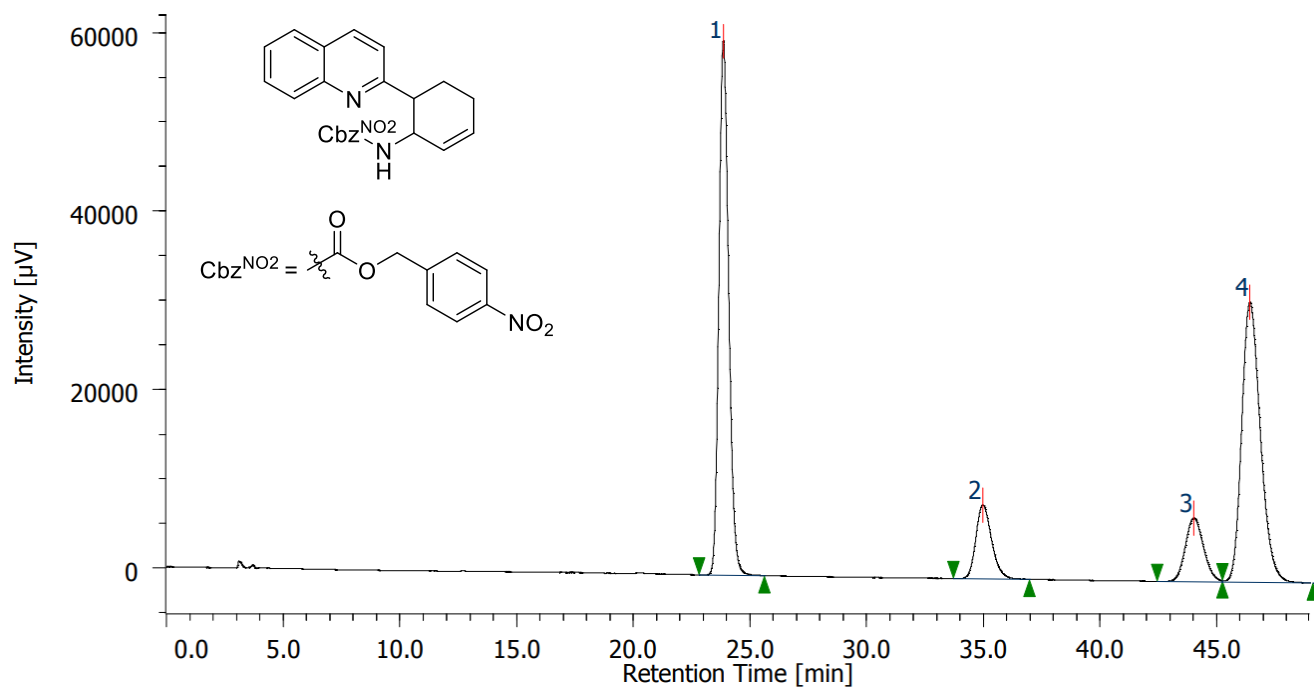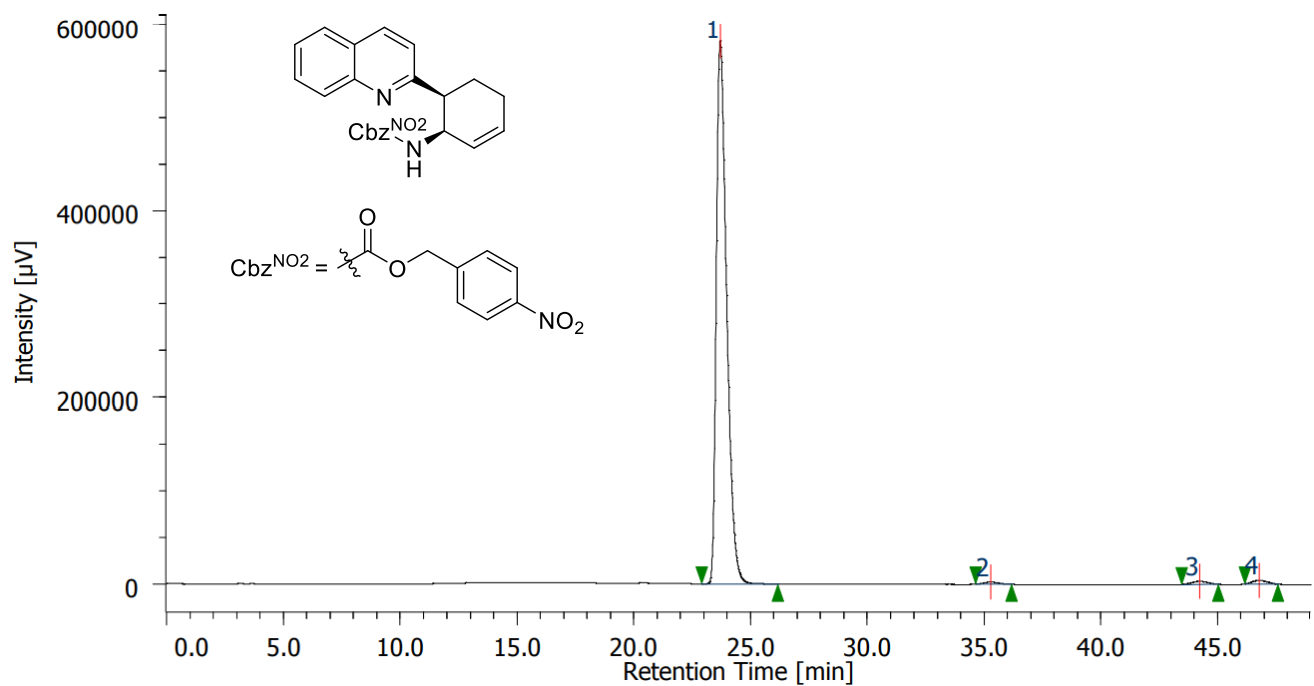

12aa

| Peak                 | 1 ( <i>endo</i> ) | 2 ( <i>exo</i> ) | 3 ( <i>exo</i> ) | 4 ( <i>endo</i> ) |
|----------------------|-------------------|------------------|------------------|-------------------|
| Retention Time (min) | 23.7              | 35.3             | 44.2             | 46.8              |
| Area (%)             | 97.6              | 0.6              | 0.8              | 1.0               |

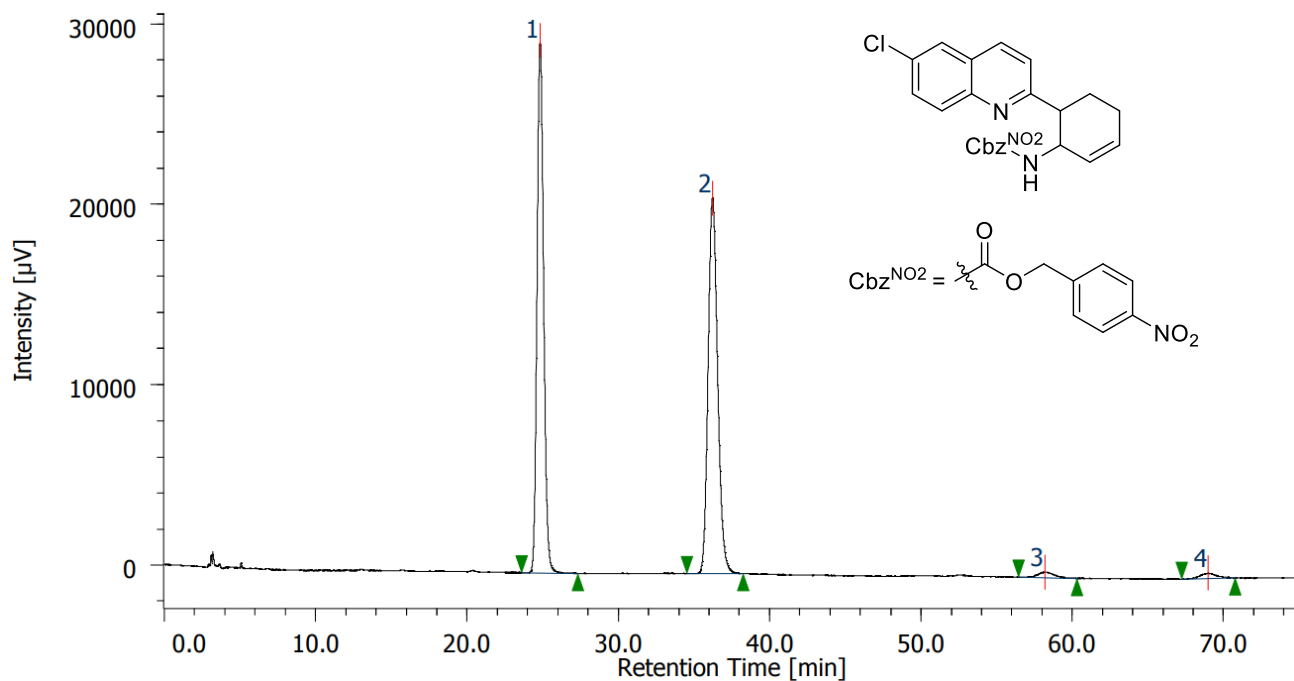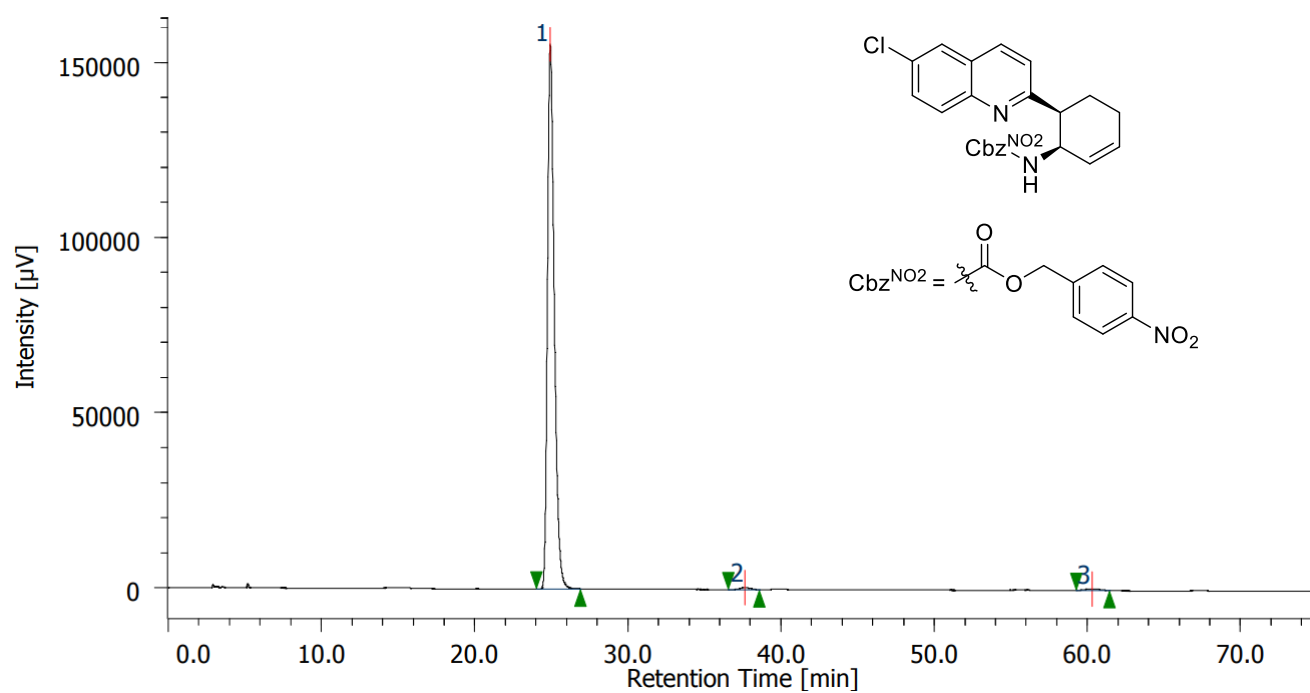

12ba

| Peak                 | 1 ( <i>endo</i> ) | 2 ( <i>endo</i> ) | 3 ( <i>exo</i> ) | 4 ( <i>exo</i> ) |
|----------------------|-------------------|-------------------|------------------|------------------|
| Retention Time (min) | 24.8              | 36.2              | 58.2             | 68.9             |
| Area (%)             | 98.8              | 0.5               | 0.7              | -                |

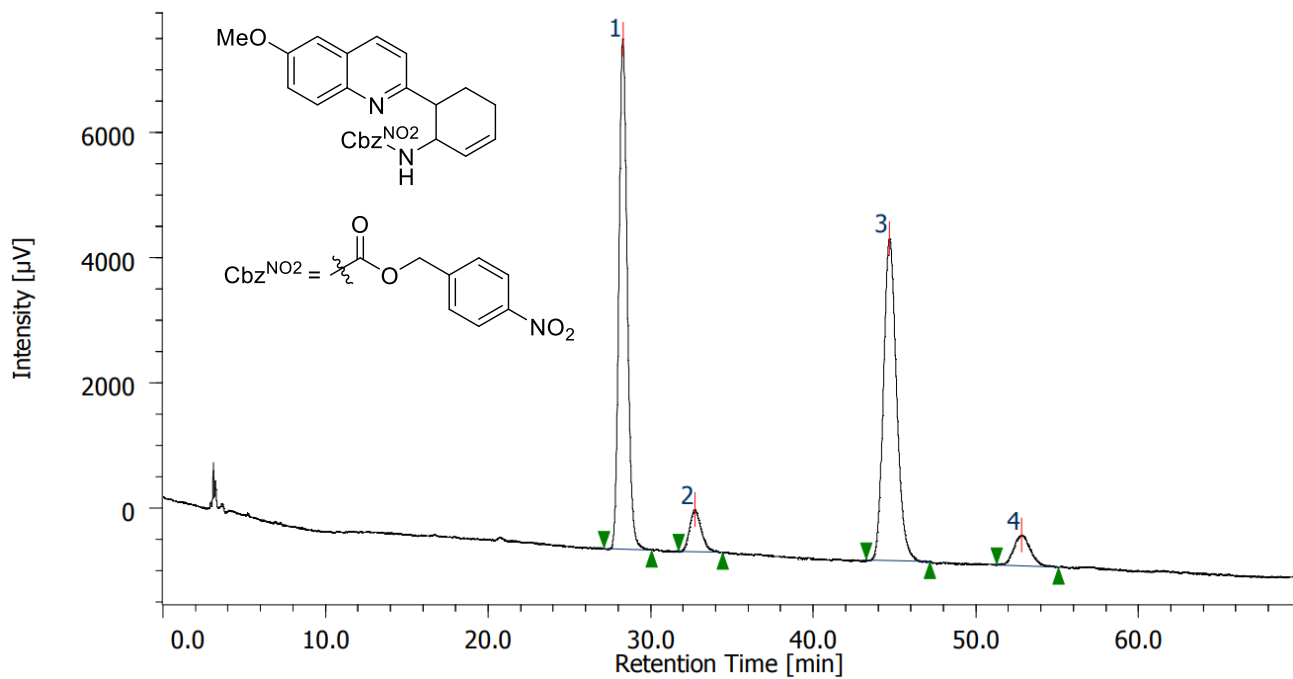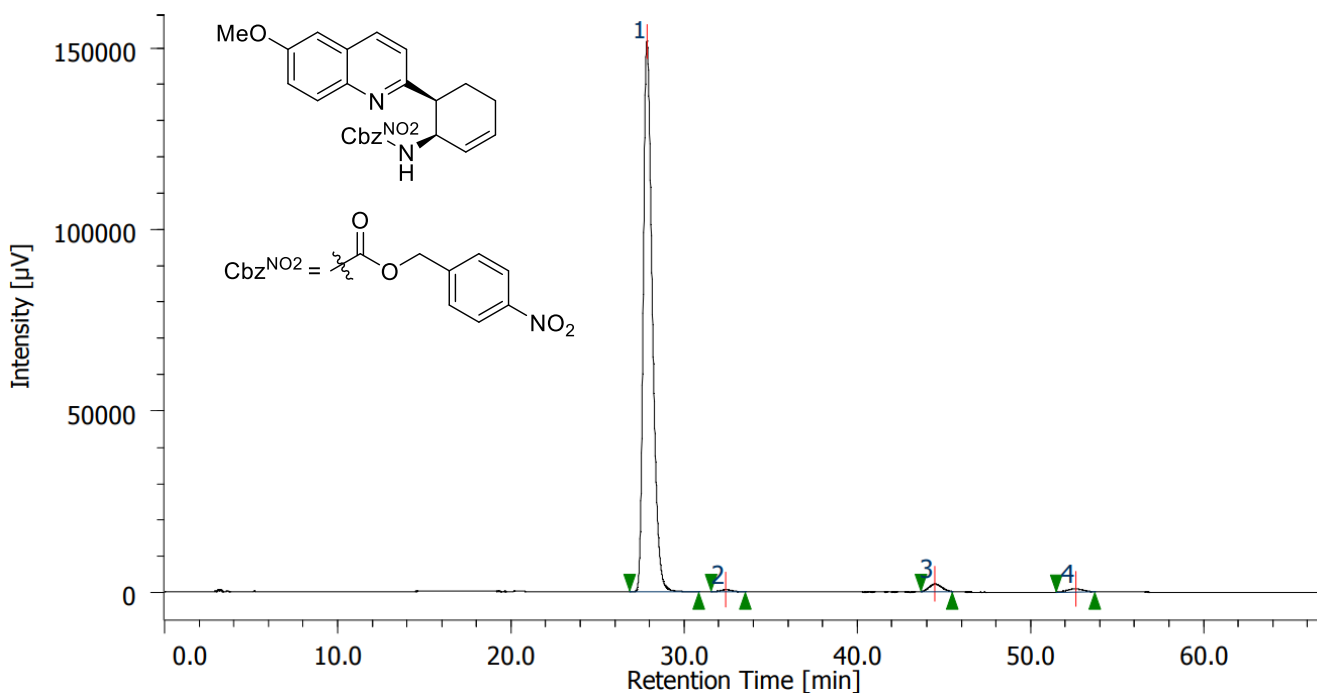

12ca

| Peak                 | 1 ( <i>endo</i> ) | 2 ( <i>exo</i> ) | 3 ( <i>endo</i> ) | 4 ( <i>exo</i> ) |
|----------------------|-------------------|------------------|-------------------|------------------|
| Retention Time (min) | 27.8              | 32.4             | 44.5              | 52.6             |
| Area (%)             | 96.7              | 0.5              | 1.9               | 1.0              |

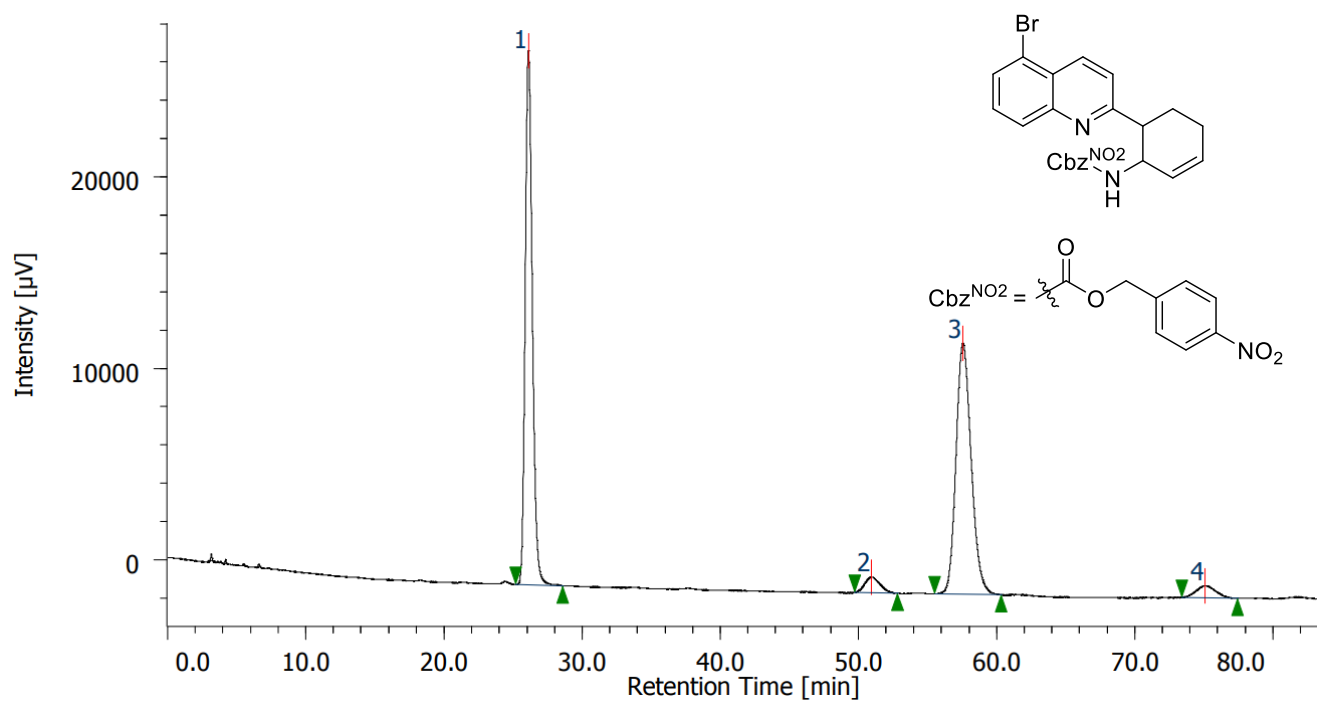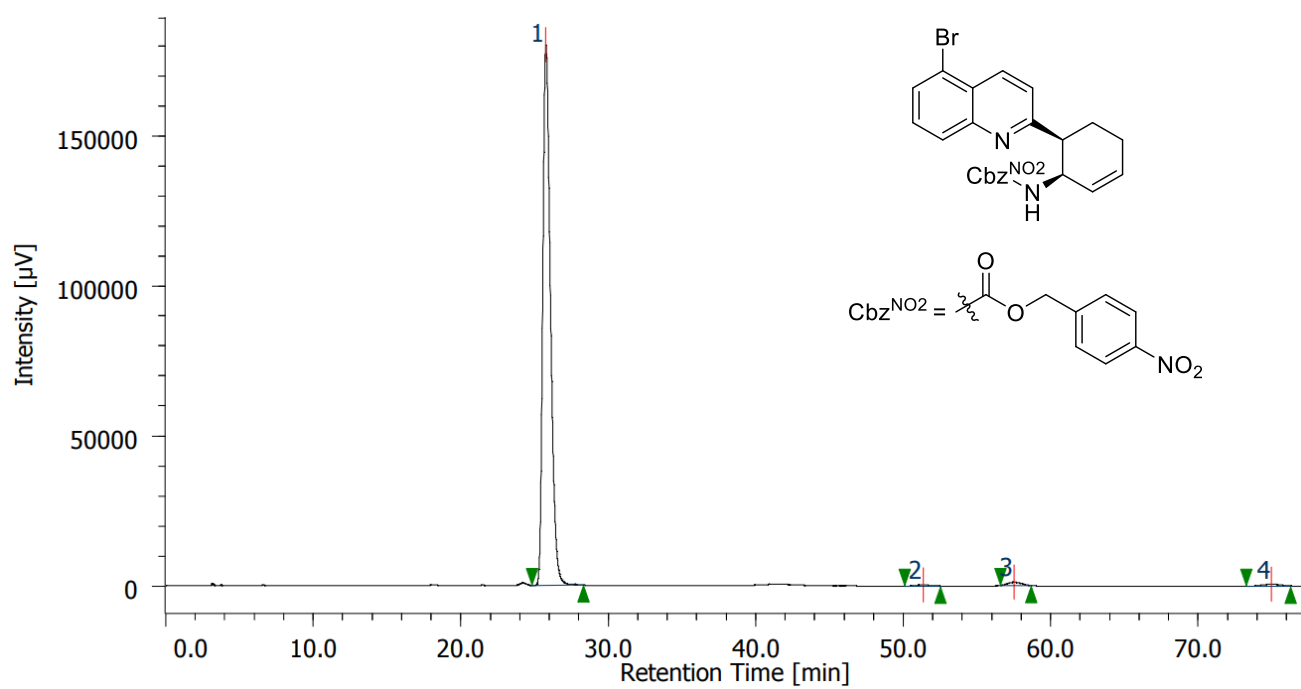

### 12da

| Peak                 | 1 ( <i>endo</i> ) | 2 ( <i>exo</i> ) | 3 ( <i>endo</i> ) | 4 ( <i>exo</i> ) |
|----------------------|-------------------|------------------|-------------------|------------------|
| Retention Time (min) | 25.8              | 51.3             | 57.5              | 75.0             |
| Area (%)             | 97.7              | 0.4              | 1.1               | 0.8              |

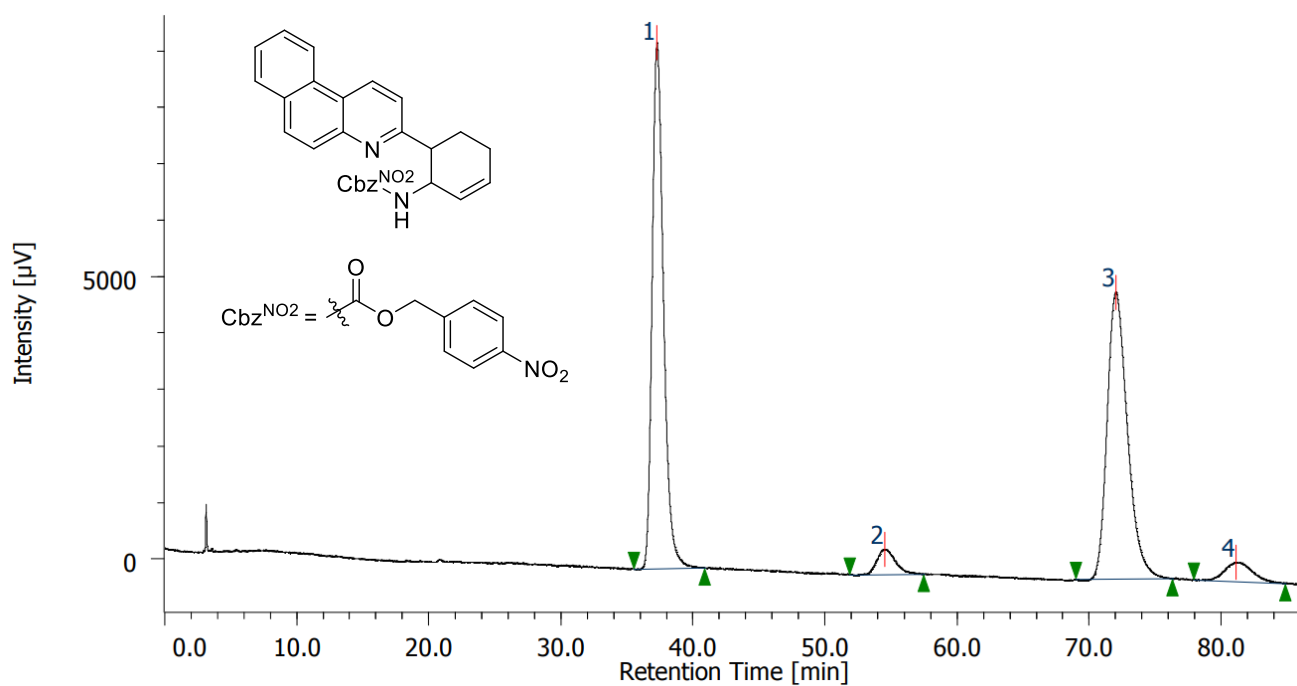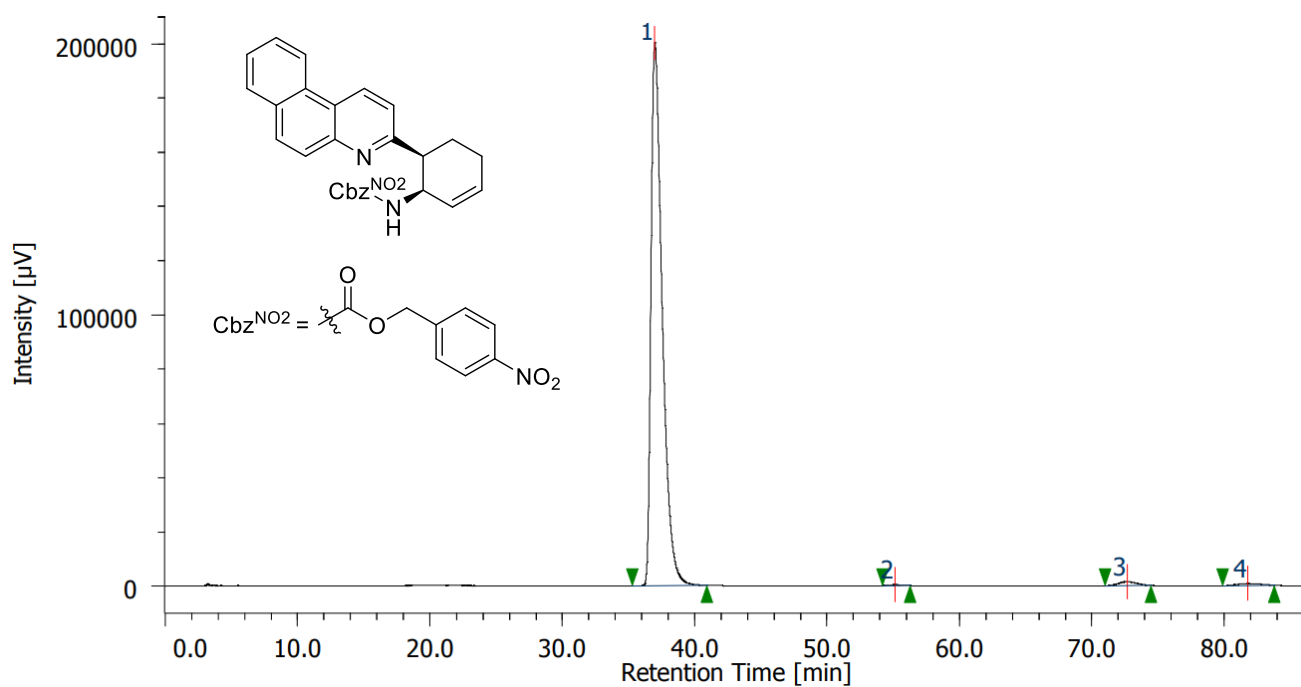

### 12ea

| Peak                 | 1 ( <i>endo</i> ) | 2 ( <i>exo</i> ) | 3 ( <i>endo</i> ) | 4 ( <i>exo</i> ) |
|----------------------|-------------------|------------------|-------------------|------------------|
| Retention Time (min) | 37.0              | 55.1             | 72.6              | 81.7             |
| Area (%)             | 97.9              | 0.2              | 1.2               | 0.8              |

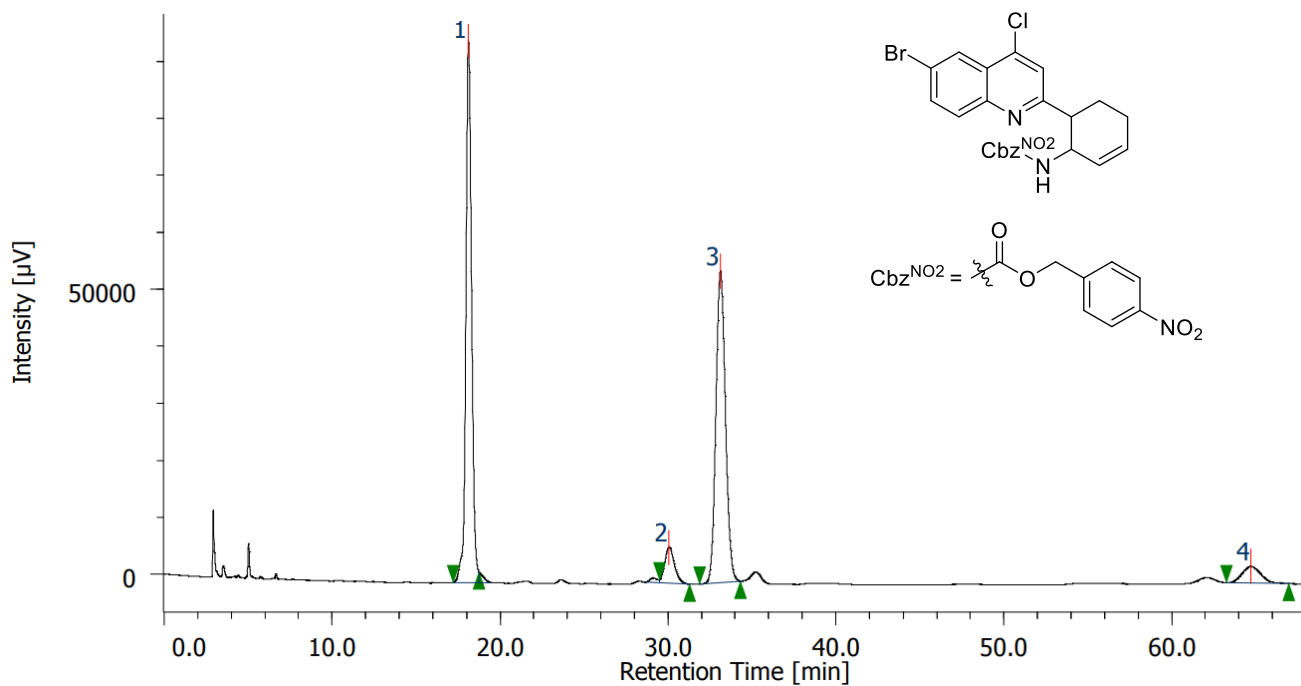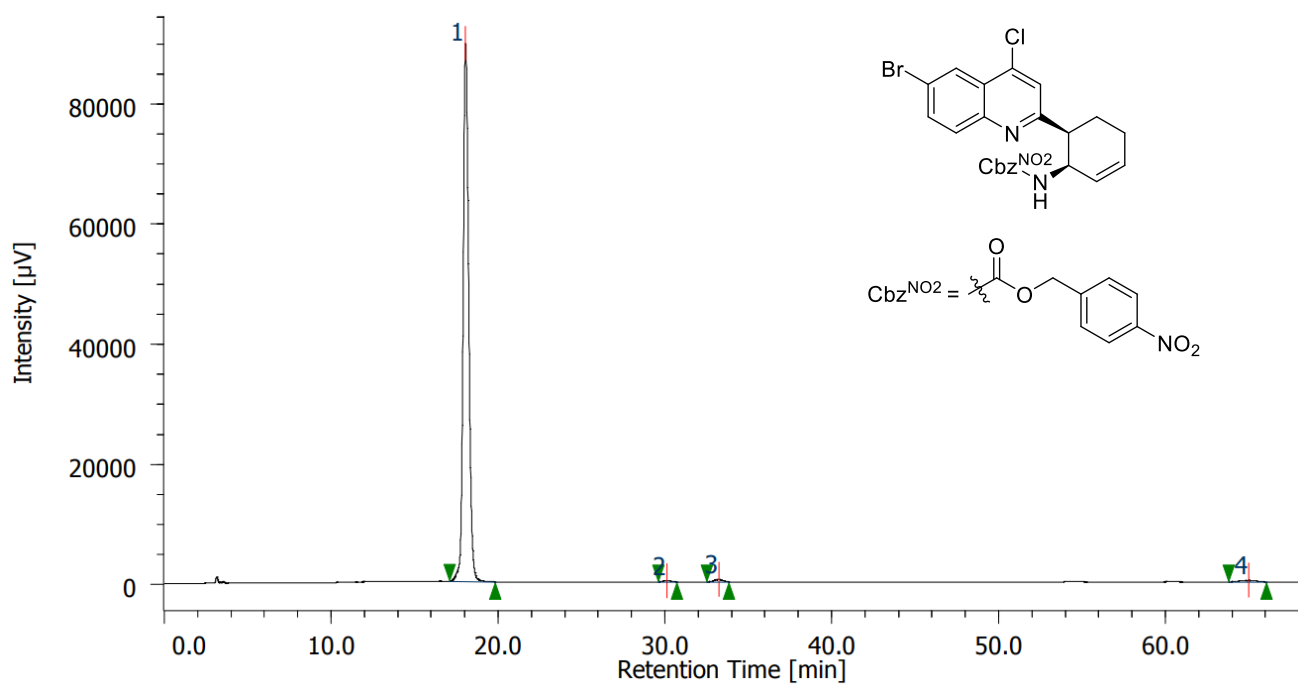

12fa

| Peak                 | 1 ( <i>endo</i> ) | 2 ( <i>exo</i> ) | 3 ( <i>endo</i> ) | 4 ( <i>exo</i> ) |
|----------------------|-------------------|------------------|-------------------|------------------|
| Retention Time (min) | 18.0              | 30.1             | 33.2              | 65.0             |
| Area (%)             | 98.1              | 0.4              | 0.7               | 0.8              |

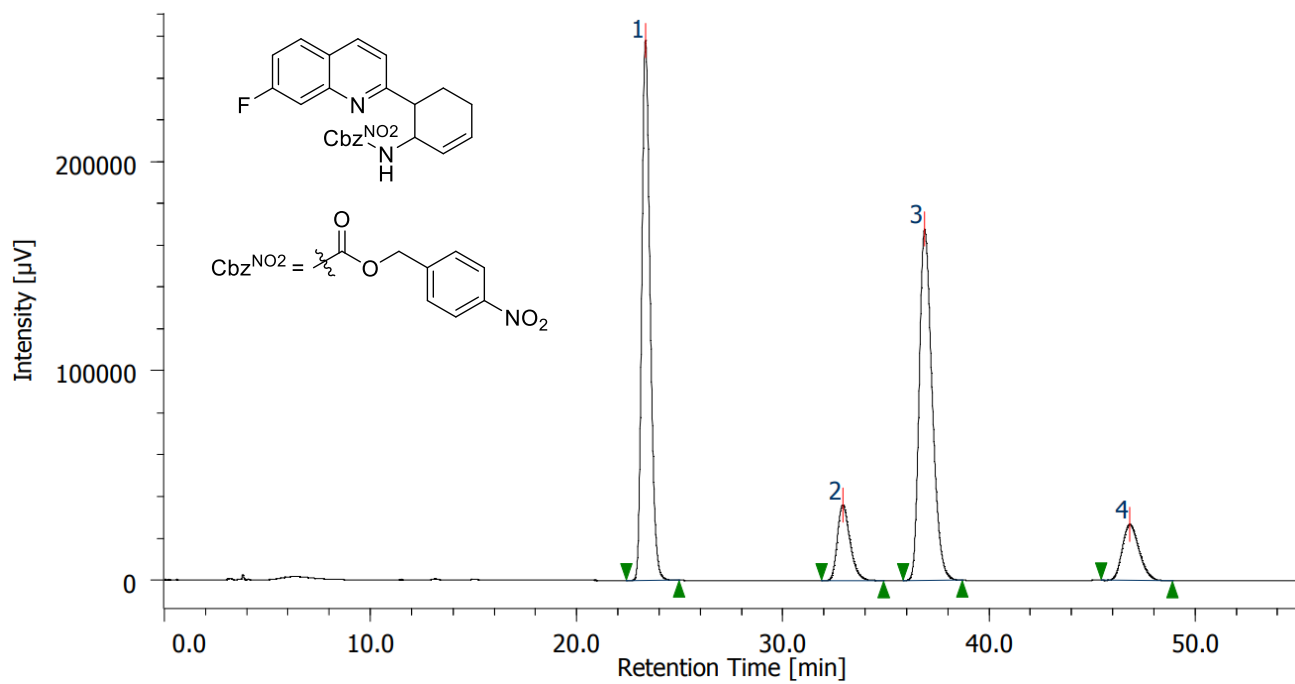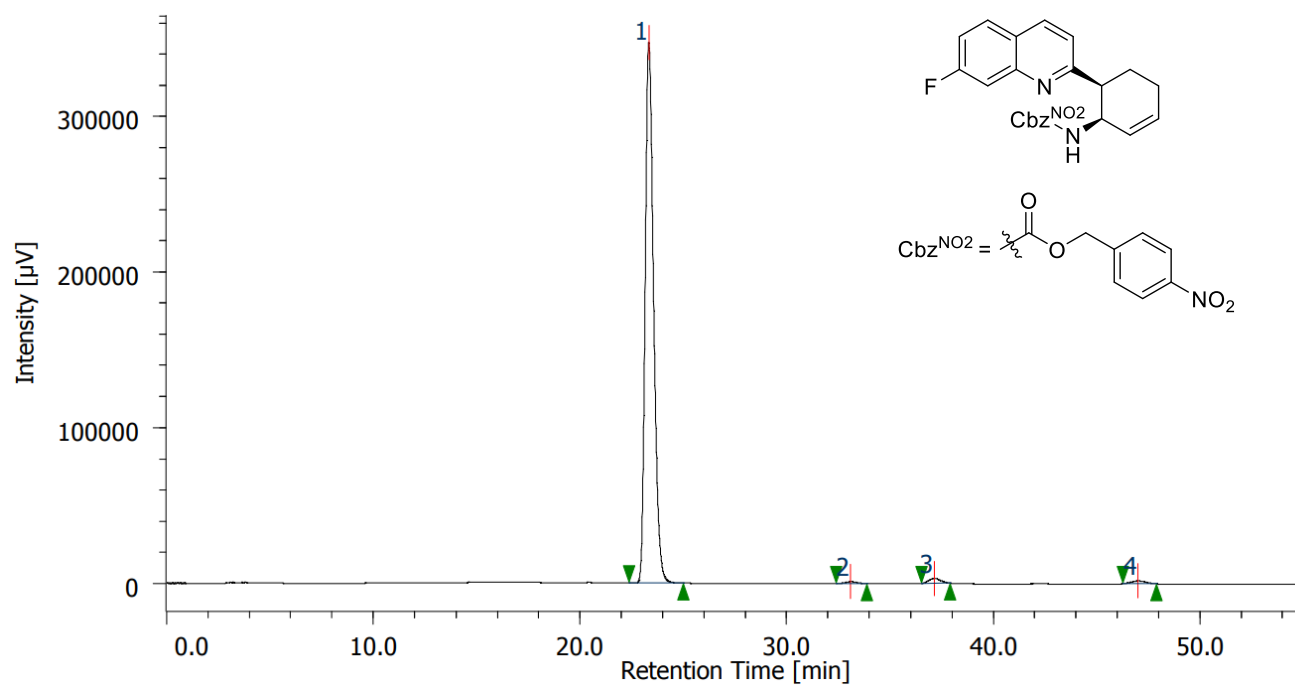

12ga

| Peak                 | 1 ( <i>endo</i> ) | 2 ( <i>exo</i> ) | 3 ( <i>endo</i> ) | 4 ( <i>exo</i> ) |
|----------------------|-------------------|------------------|-------------------|------------------|
| Retention Time (min) | 23.3              | 33.1             | 37.1              | 47.0             |
| Area (%)             | 97.4              | 0.5              | 1.2               | 0.9              |

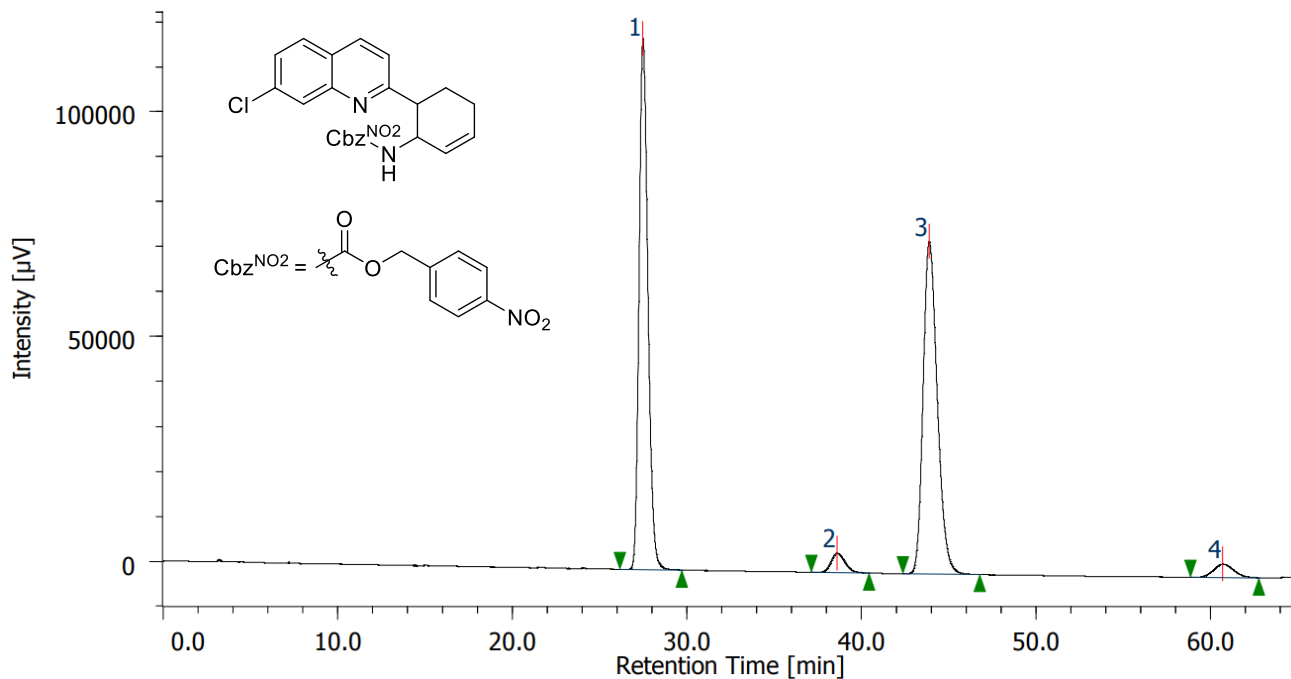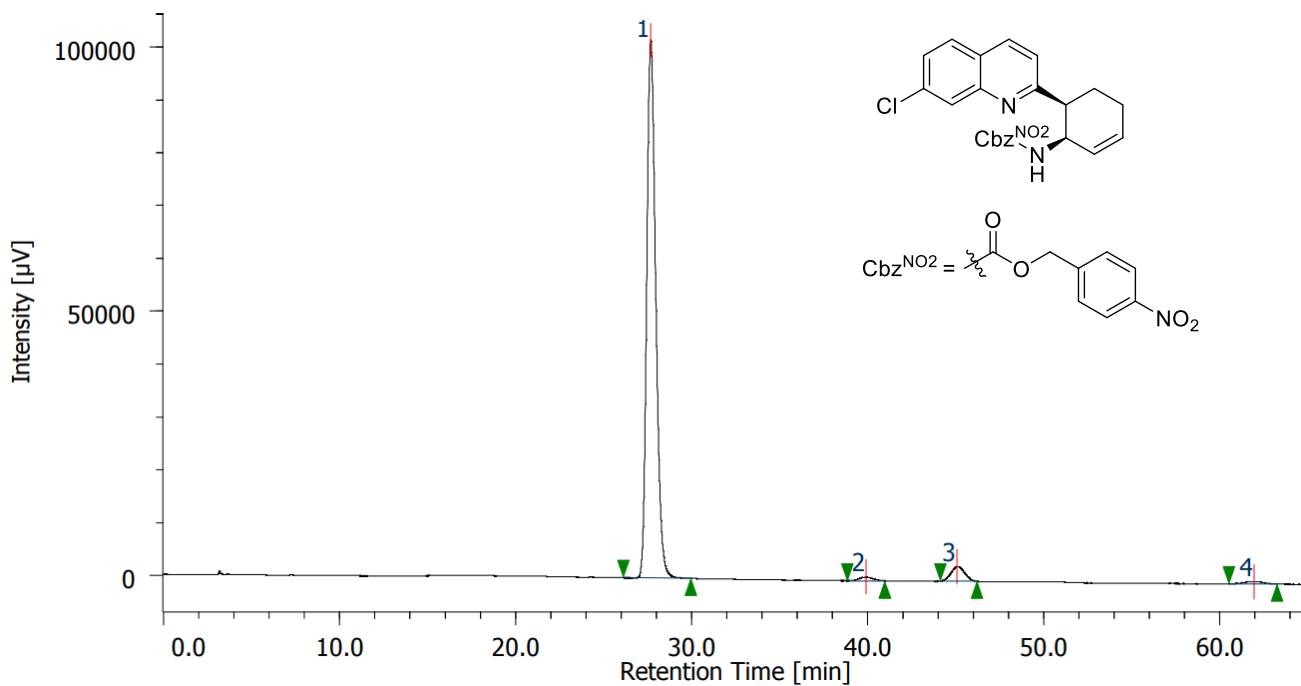

12ha

| Peak                 | 1 ( <i>endo</i> ) | 2 ( <i>exo</i> ) | 3 ( <i>endo</i> ) | 4 ( <i>exo</i> ) |
|----------------------|-------------------|------------------|-------------------|------------------|
| Retention Time (min) | 27.7              | 39.9             | 45.1              | 62.0             |
| Area (%)             | 94.2              | 1.0              | 3.9               | 0.9              |



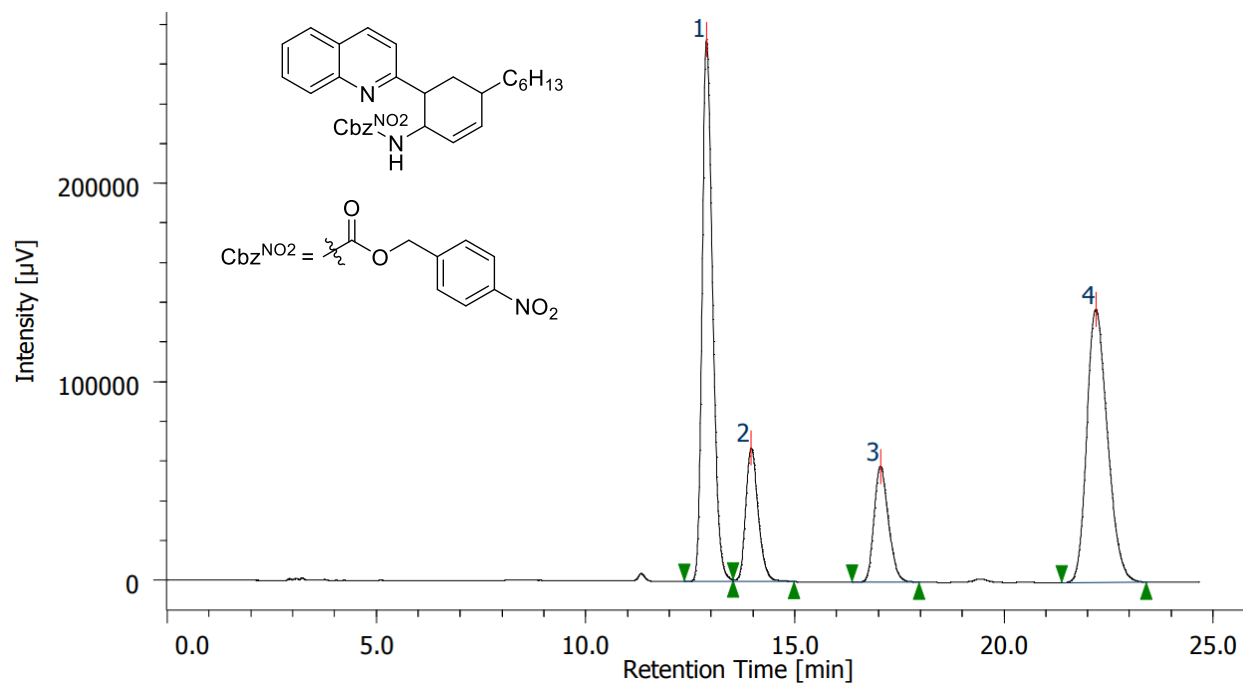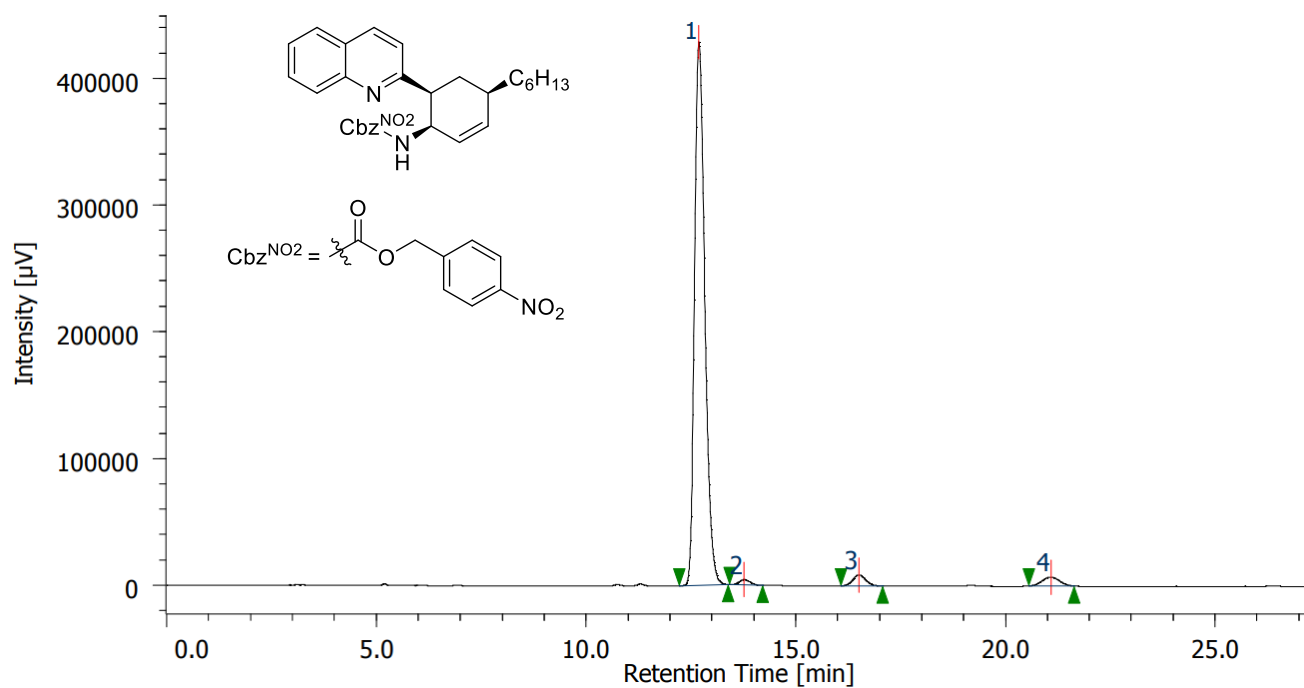

12ac

| Peak                 | 1 ( <i>endo</i> ) | 2 ( <i>exo</i> ) | 3 ( <i>exo</i> ) | 4 ( <i>endo</i> ) |
|----------------------|-------------------|------------------|------------------|-------------------|
| Retention Time (min) | 12.7              | 13.8             | 16.5             | 21.1              |
| Area (%)             | 94.0              | 1.0              | 2.4              | 2.6               |

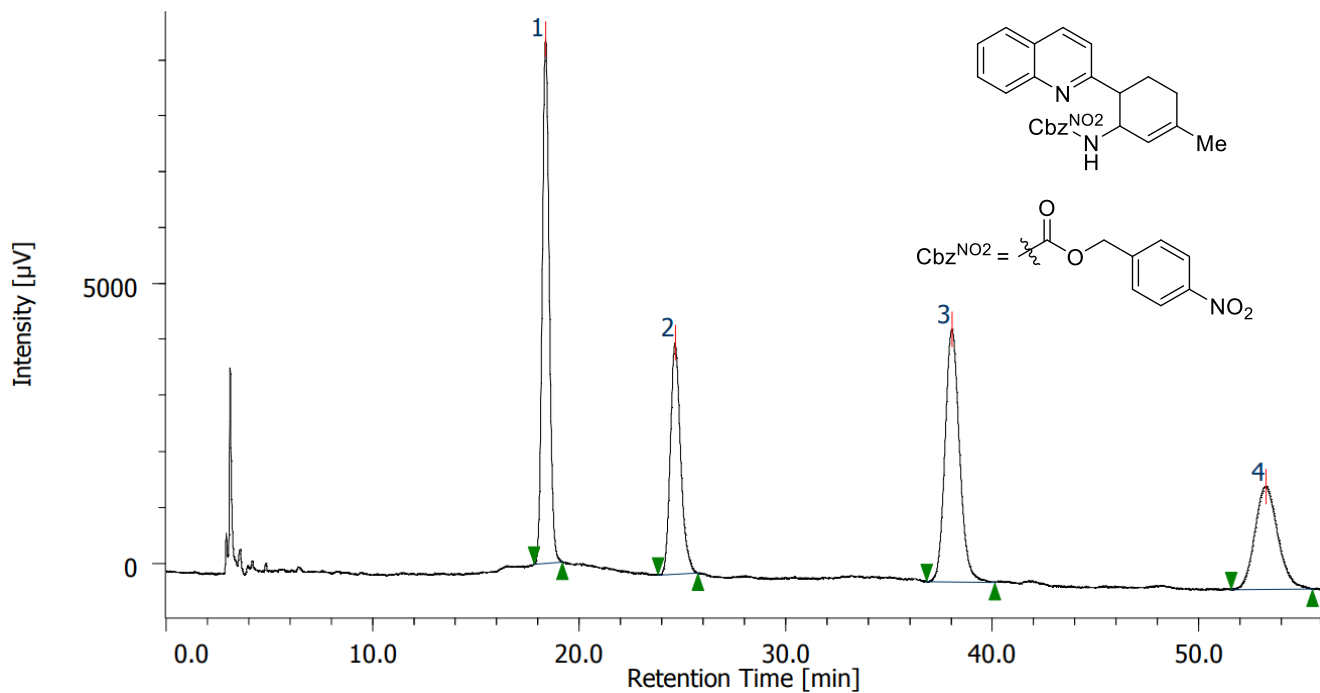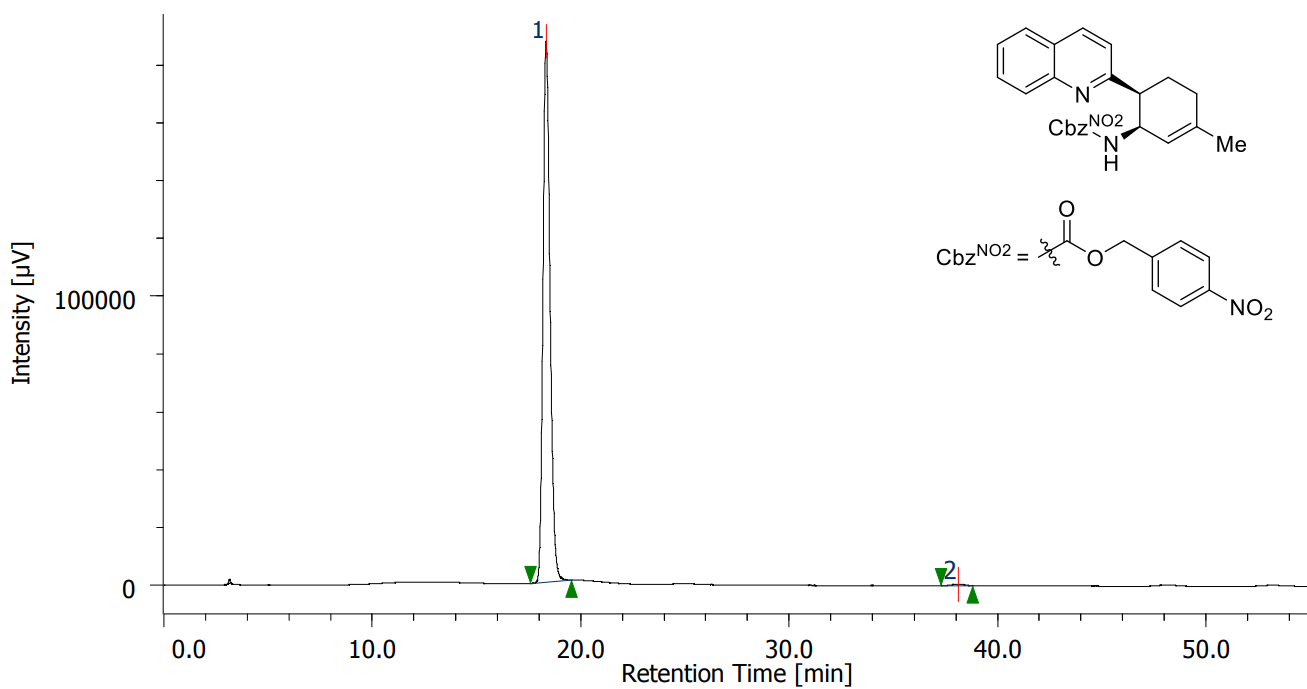

### 12ad

| Peak                 | 1 ( <i>endo</i> ) | 2 ( <i>exo</i> ) | 3(2) ( <i>endo</i> ) | 4 ( <i>exo</i> ) |
|----------------------|-------------------|------------------|----------------------|------------------|
| Retention Time (min) | 18.4              | 24.6             | 38.0                 | 53.2             |
| Area (%)             | 99.4              | -                | 0.6                  | -                |
